# Supplementary material for: Novel isatin–indole derivatives as potential inhibitors of chorismate mutase (CM): their synthesis along with unexpected formation of 2-indolylmethylamino benzoate ester under Pd–Cu catalysis
Source: PubMed Central journal article supplement — RSC Adv. 2020 Jan 2;10(1):289–97. doi: 10.1039/c9ra09236f (PMC9047634; doi:10.1039/c9ra09236f), 2020-01-02
Supplement: RA-010-C9RA09236F-s001.pdf [file RA-010-C9RA09236F-s001.pdf]

## Electronic Supplementary Information

### Novel isatin-indole derivatives as potential inhibitors of chorismate mutase (CM): their synthesis along with unexpected formation of 2-indolylmethylamino benzoate ester under Pd-Cu catalysis

Gangireddy Sujeevan Reddy,<sup>a,b</sup> Kazi Amirul Hossain,<sup>a</sup> Jetta Sandeep Kumar,<sup>a,b</sup>  
B. Thirupataiah,<sup>a,b</sup> Rebecca Kristina Edwin,<sup>a</sup> Varadaraj Bhat Giliyaru,<sup>b</sup> Raghu Chandrashekhar  
Hariharapura,<sup>b</sup> G. Gautham Shenoy,<sup>b</sup> Parimal Misra<sup>a</sup> and Manojit Pal<sup>a,\*</sup>

<sup>a</sup>*Dr. Reddy's Institute of Life Sciences, University of Hyderabad Campus, Gachibowli,  
Hyderabad 500 046, India.*

<sup>b</sup>*Manipal College of Pharmaceutical Sciences, Manipal Academy of Higher Education,  
Madhav Nagar, Manipal, 576 104, Karnataka, India.*

*E-mail address: [manojitpal@rediffmail.com](mailto:manojitpal@rediffmail.com)*

#### Table of contents

| S.No. | Content                                         | Page No.  |
|-------|-------------------------------------------------|-----------|
| 1     | Figure S-1                                      | .....S-2  |
| 2     | Figure S-2                                      | .....S-3  |
| 3     | Figure S-3                                      | .....S-4  |
| 4     | Figure S-4                                      | .....S-5  |
| 5     | Figure S-5                                      | .....S-6  |
| 6     | Figure S-6                                      | .....S-7  |
| 7     | Figure S-7                                      | .....S-8  |
| 8     | Figure S-8                                      | .....S-9  |
| 9     | Experimental Section, Chemistry                 | .....S-10 |
| 10    | Docking studies                                 | .....S-32 |
| 11    | Pharmacology, Chorismate mutase enzymatic assay | .....S-33 |
| 12    | References                                      | .....S-34 |

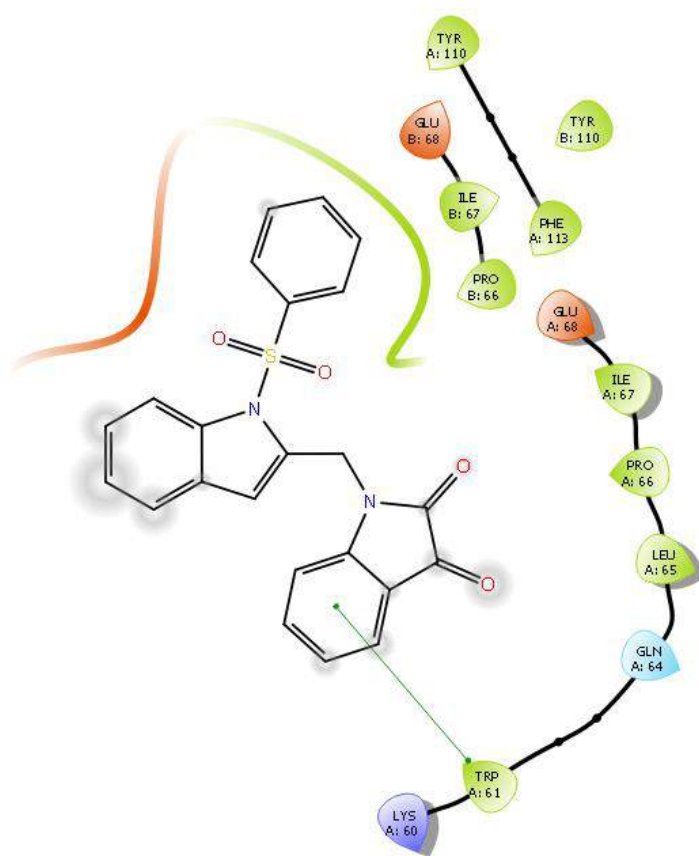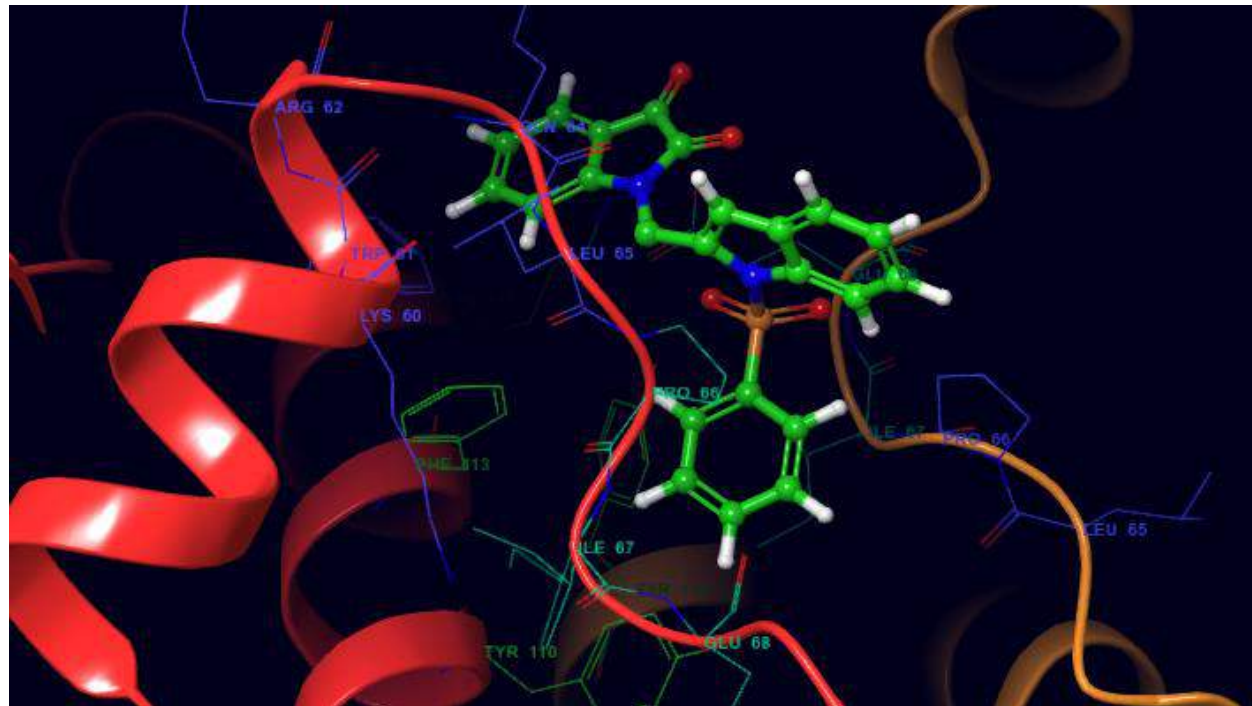

**Fig S-1.** The 2D followed by 3D interaction diagram of molecule **F-1** with interface residues of chorismate mutase (PDB code: 2FP2).

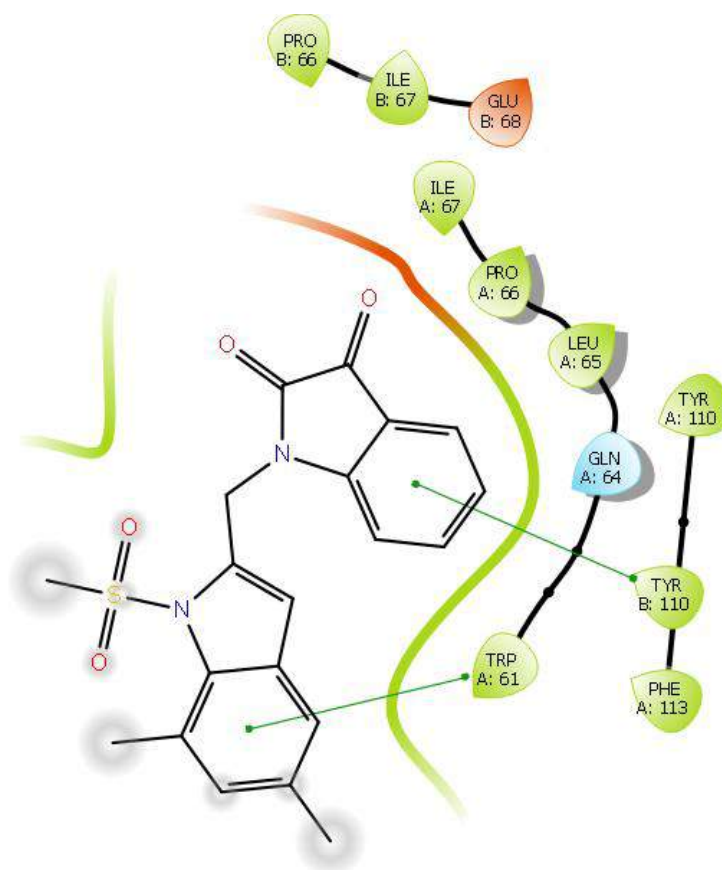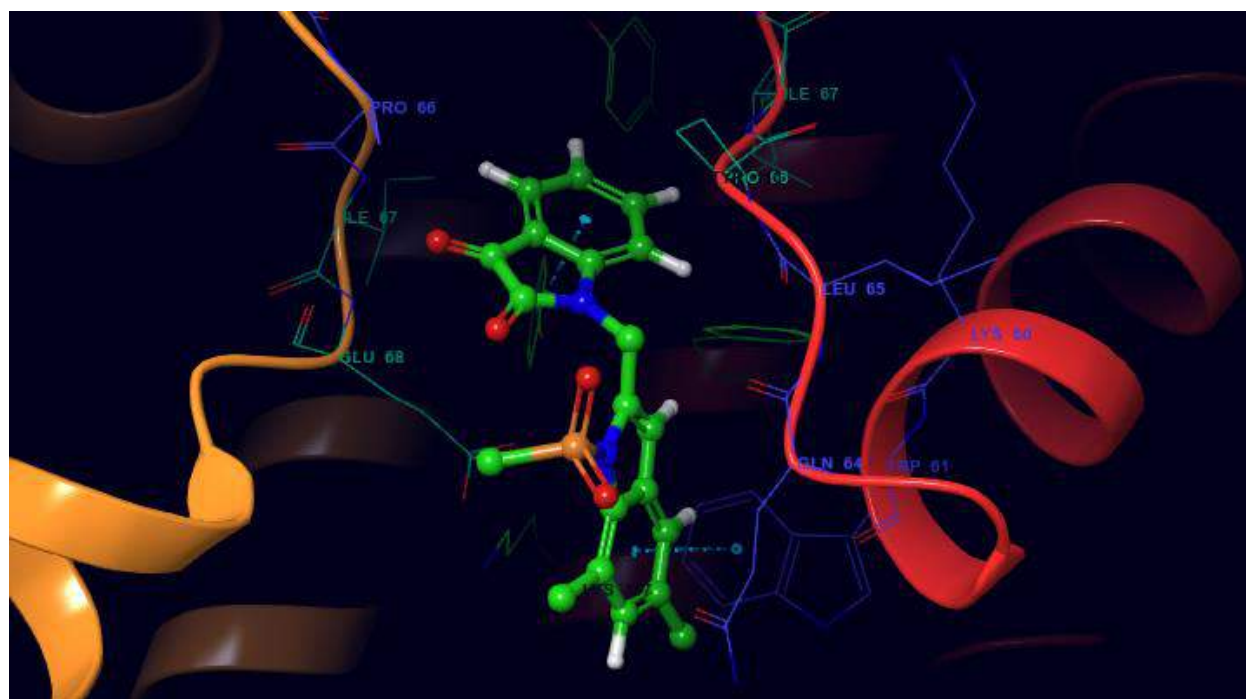

**Fig S-2.** The 2D followed by 3D interaction diagram of molecule **F-2** with interface residues of chorismate mutase (PDB code: 2FP2). The pi-pi stacking is shown in cyan color.

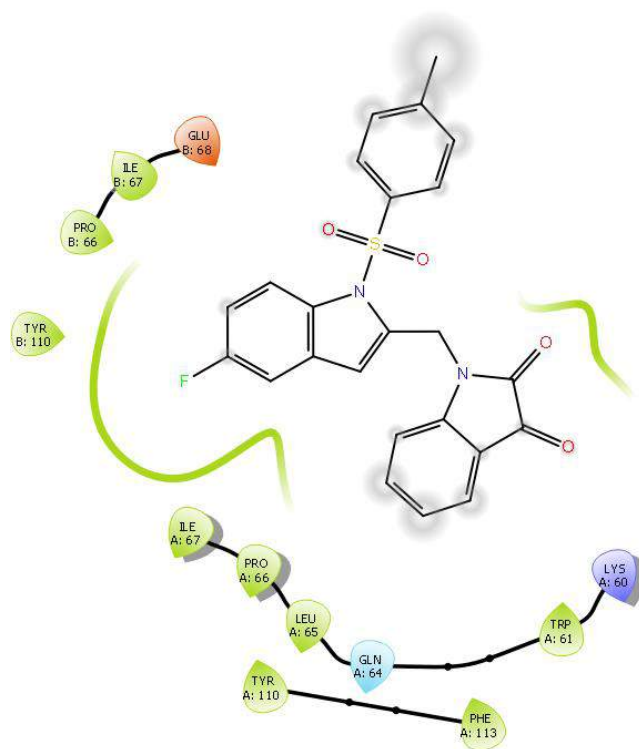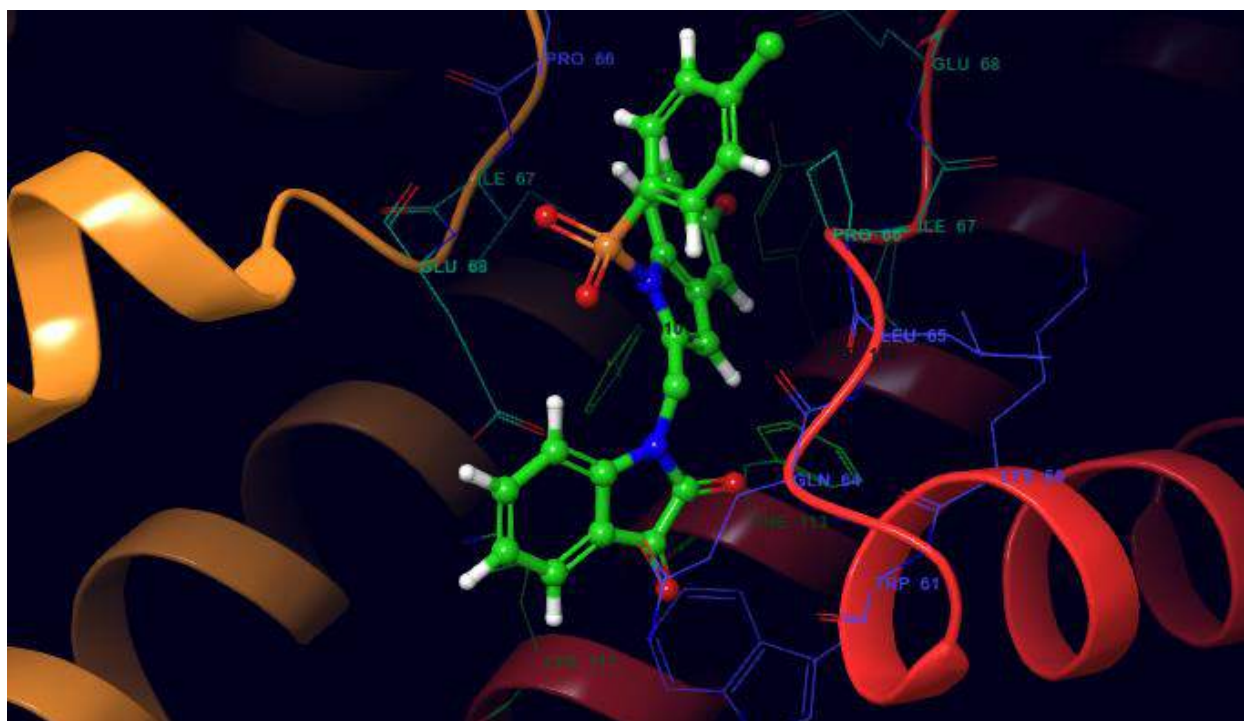

**Fig S-3.** The 2D followed by 3D interaction diagram of molecule **F-3** with interface residues of chorismate mutase (PDB code: 2FP2).



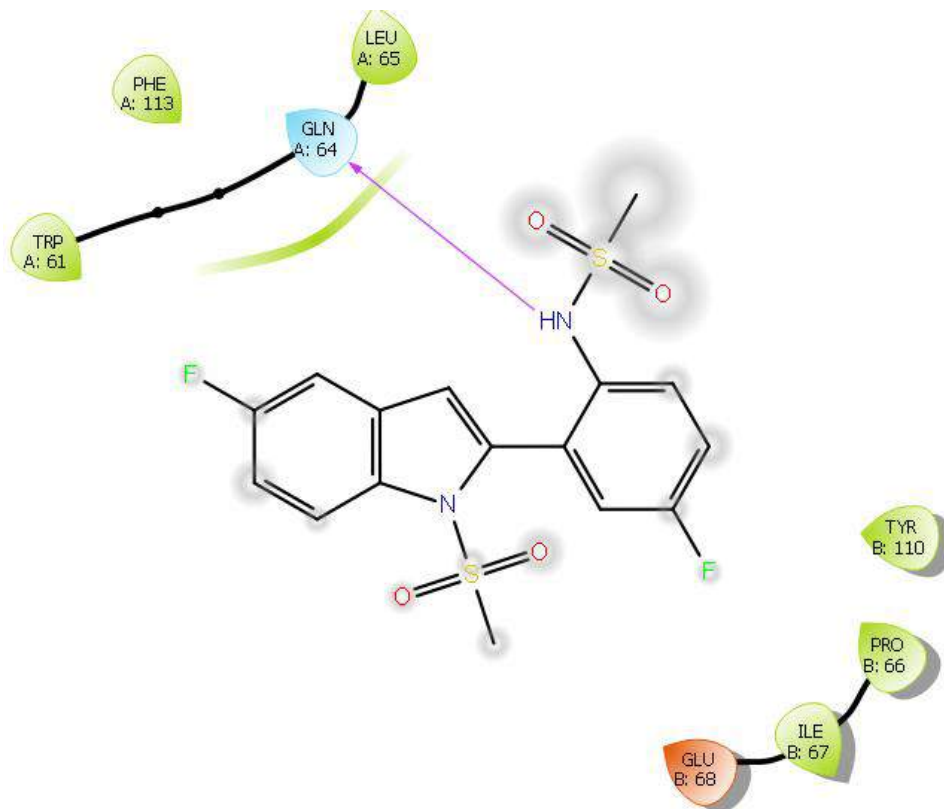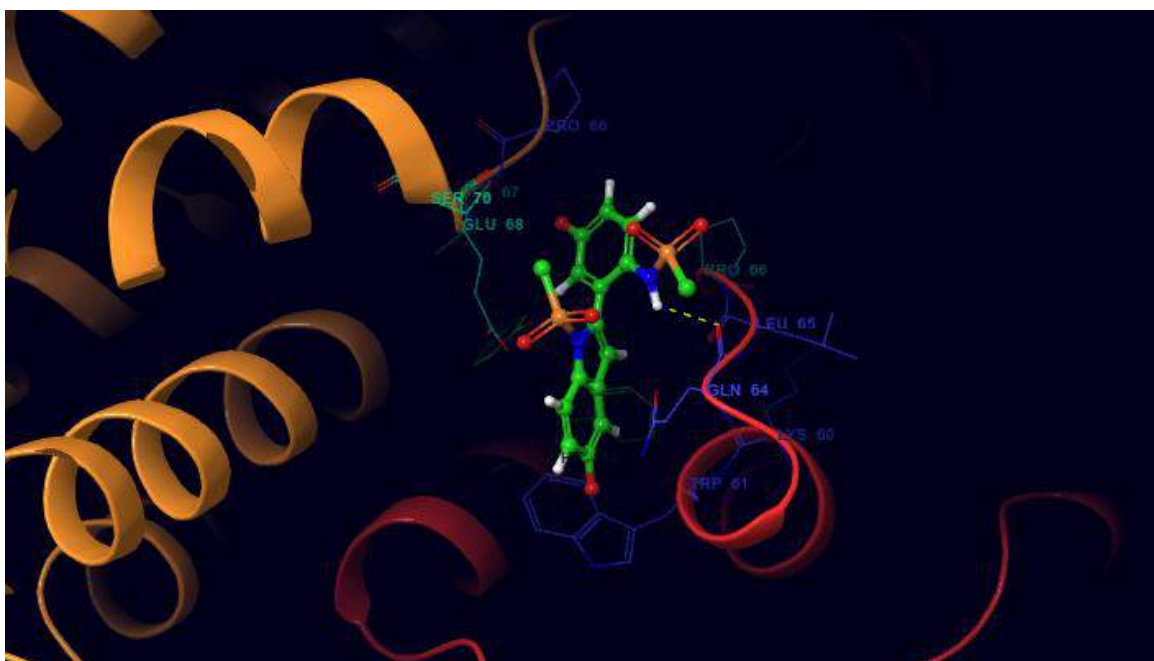

**Fig S-4.** The 2D followed by 3D interaction diagram of molecule **E** with interface residues of chorismate mutase (PDB code: 2FP2). H-bond is shown in yellow color.

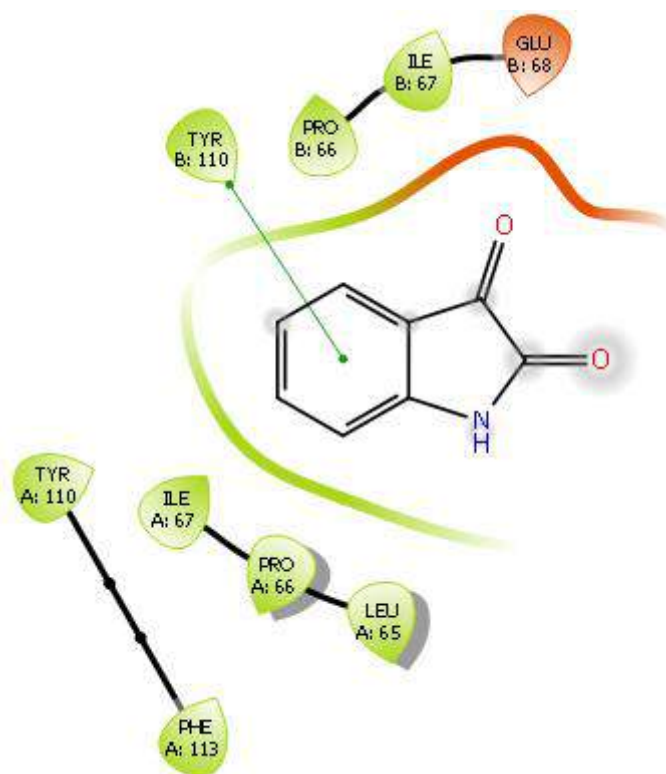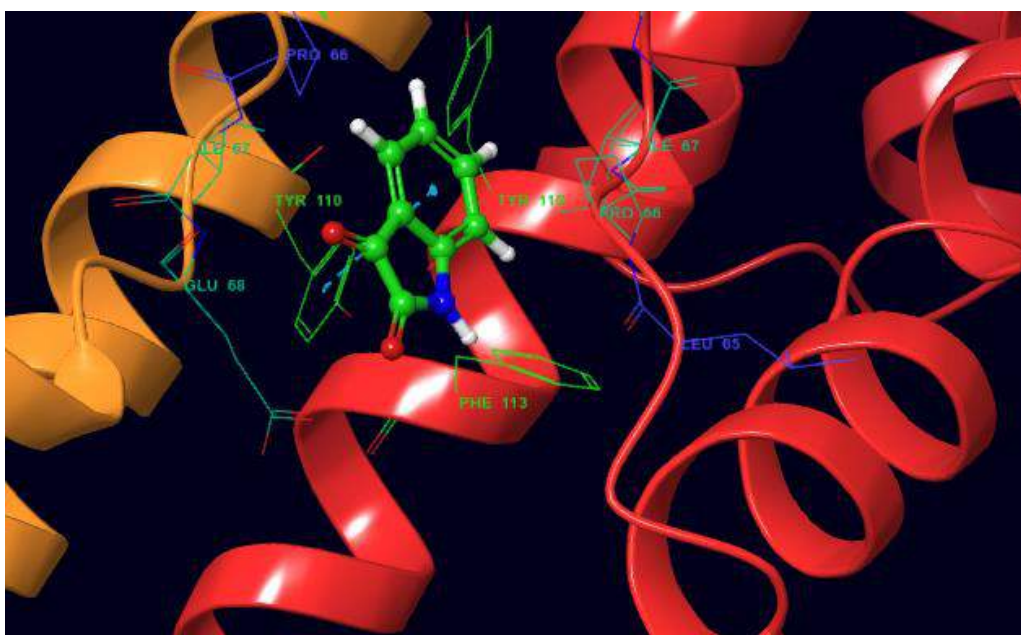

**Fig S-5.** The 2D followed by 3D interaction diagram of isatin **D** with interface residues of chorismate mutase (PDB code: 2FP2). The pi-pi stacking is shown in cyan color.

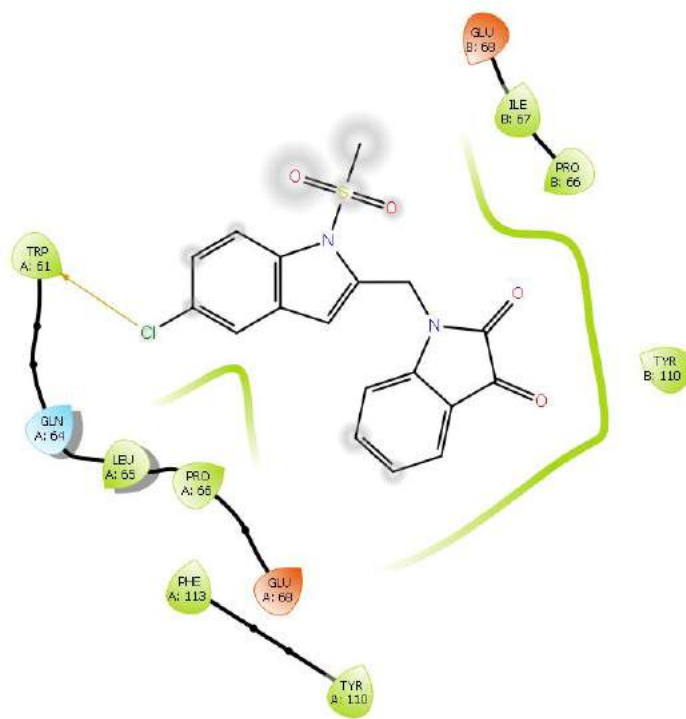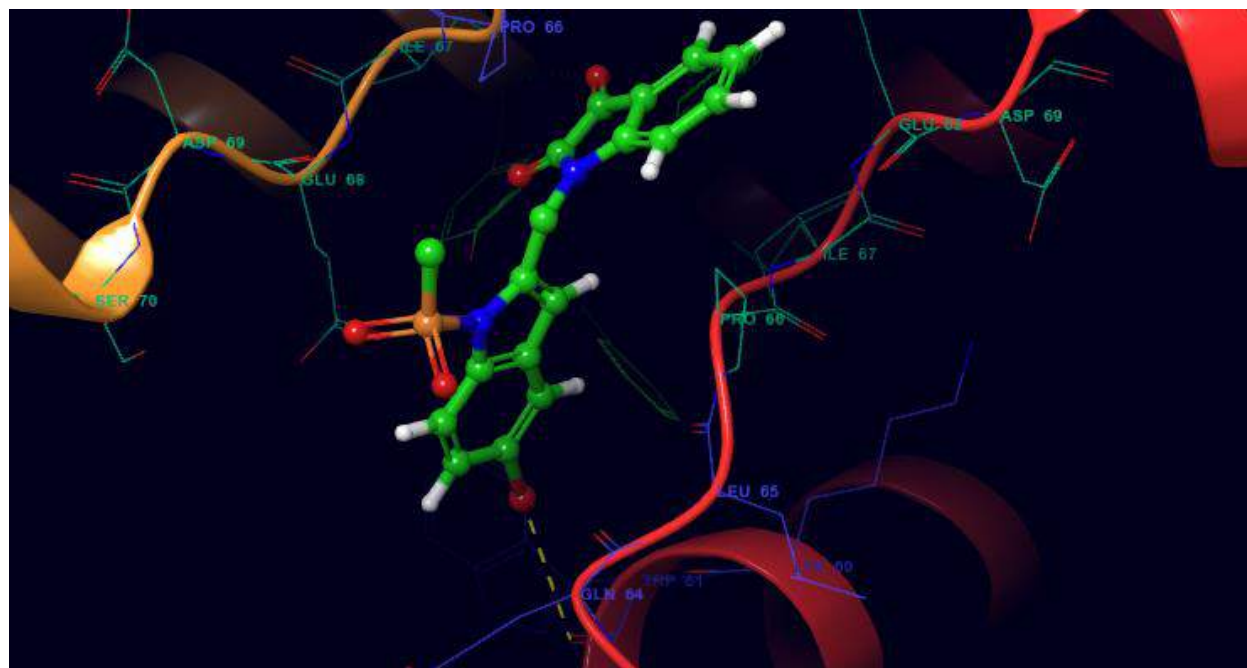

**Fig S-6.** The 2D followed by 3D interaction diagram of **3e** with interface residues of chorismate mutase (PDB code: 2FP2). The halogen bond is shown in yellow color.

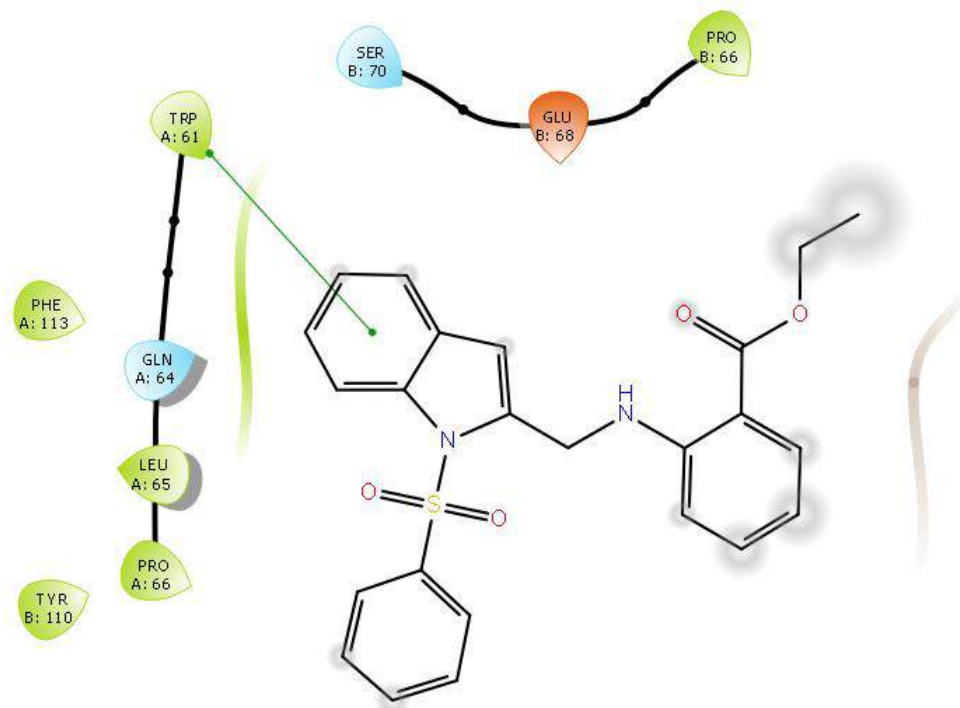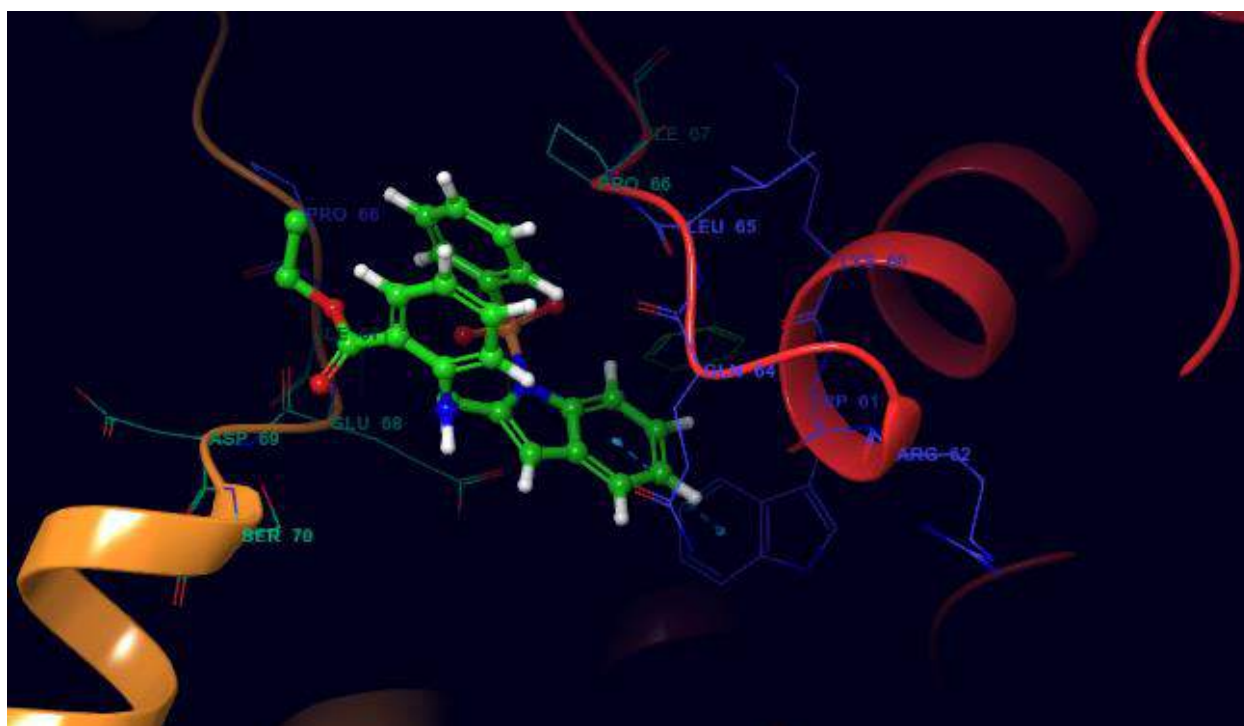

**Fig S-7.** The 2D followed by 3D interaction diagram of ester **4f** with interface residues of chorismate mutase (PDB code: 2FP2). A relatively lesser number of hydrophobic contacts has been found here and a pi-pi interaction found with TRP61A.

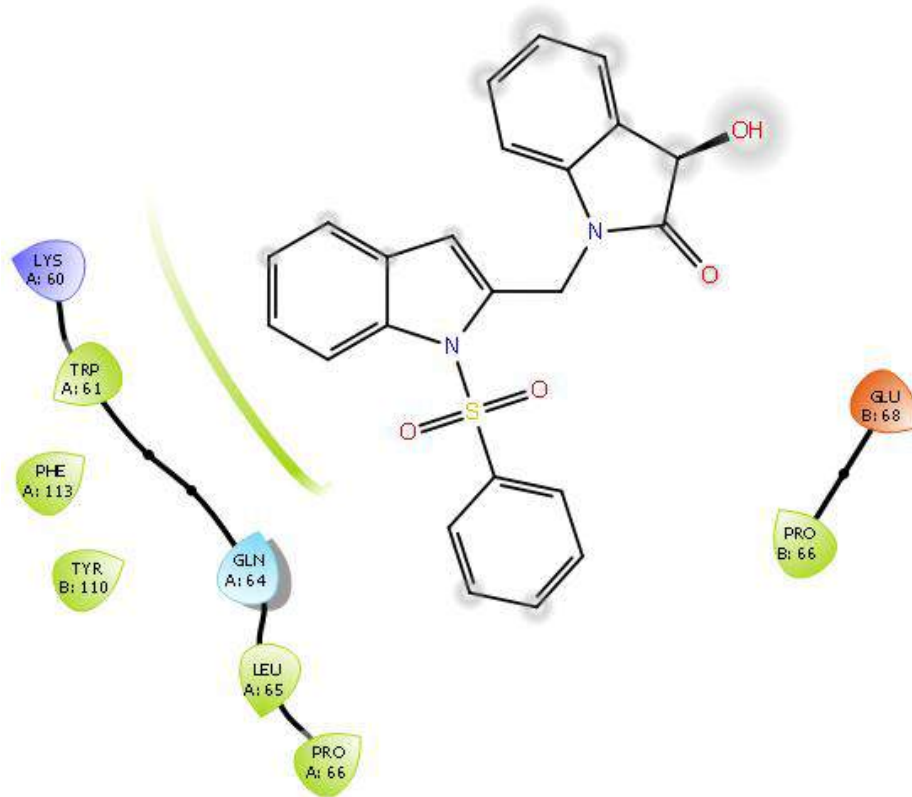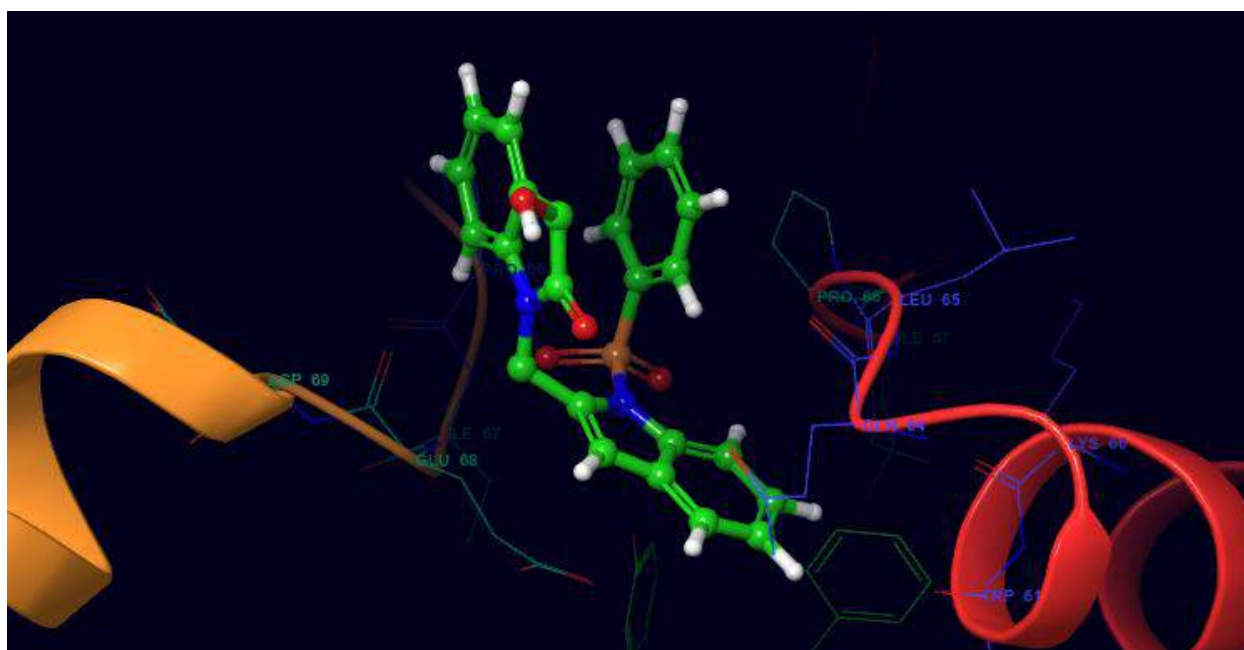

**Fig S-8.** The 2D followed by 3D interaction diagram of alcohol **5b** with interface residues of chorismate mutase (PDB code: 2FP2). The compound showed lesser number of hydrophobic contacts.



## Experimental Section

### Chemistry

**General methods:** Unless stated otherwise, reactions were performed under nitrogen atmosphere using oven dried glassware. Reactions were monitored by thin layer chromatography (TLC) on silica gel plates (60 F254), visualizing with ultraviolet light or iodine spray. Flash chromatography was performed on silica gel (230-400 mesh) using distilled hexane and EtOAc.  $^1\text{H}$  and  $^{13}\text{C}$  NMR spectra were recorded in  $\text{CDCl}_3$  or  $\text{DMSO}-d_6$  solution by using a 400 and 100 MHz spectrometer. Proton chemical shifts ( $\delta$ ) are relative to tetramethylsilane (TMS,  $\delta = 0.00$ ) as internal standard and expressed in ppm. Spin multiplicities are given as s (singlet), d (doublet), dd (doublet of doublet), td (triplet of doublet), t (triplet), q (quartet) and m (multiplet) as well as bs (broad singlet). Coupling constants ( $J$ ) are given in hertz. Melting points were determined using melting point apparatus and are uncorrected. MS spectra were obtained on Agilent 6430 series Triple Quad LC-MS / MS spectrometer. Chromatographic purity by HPLC (Agilent 1200 series ChemStation software) was determined by using area normalization method and the condition specified in each case: column, mobile phase (range used), flow rate, diluent, detection wavelength, and retention times. High Resolution Mass Spectra (HRMS) were obtained on a Bruker Compass data analysis 4.0 Spectrometer.

### General procedure for the preparation of compound 1

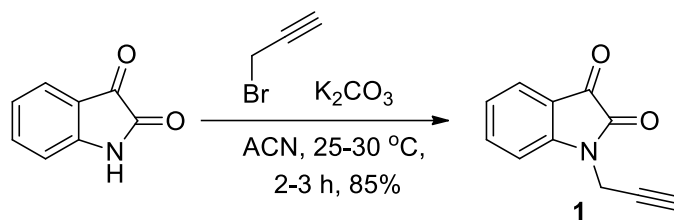

Propargyl bromide (1.2 mmol) was added to a solution of isatin (1.0 mmol) and potassium carbonate (3.0 mmol) in acetonitrile (10 mL) under a nitrogen atmosphere. The mixture was stirred at room temperature (25-30 °C) for 2-3 h. After completion (confirmed by TLC), the mixture was diluted with ice-water (60 mL) and extracted with ethyl acetate (3 x 15 mL). The organic layers were collected, combined, dried over anhydrous  $\text{Na}_2\text{SO}_4$ , filtered and concentrated under low vacuum. The residue was purified by column chromatography using 5% EtOAc in hexane as eluent to afford the title compound.

### 1-(Prop-2-yn-1-yl)indoline-2,3-dione

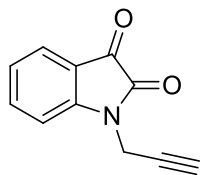

Orange solid (85% yield); mp: 128-130 °C;  $R_f$  = 0.5 (20% EtOAc/*n*-hexane);  $^1\text{H}$  NMR (400 MHz, DMSO- $d_6$ )  $\delta$ : 7.75-7.67 (m, 1H, ArH), 7.58 (d,  $J$  = 7.6 Hz, 1H, ArH), 7.22 (d,  $J$  = 8.0 Hz, 1H, ArH), 7.17 (t,  $J$  = 7.6 Hz, 1H, ArH), 4.54 (d,  $J$  = 2.4 Hz, 2H, NCH<sub>2</sub>), 3.34 (t,  $J$  = 2.4 Hz, 1H, HC $\equiv$ C);  $^{13}\text{C}$  NMR (100 MHz, DMSO- $d_6$ )  $\delta$ : 182.9 (C=O), 157.7 (C=O), 149.9, 138.5, 125.0, 124.1, 118.1, 111.6, 77.8 (-C $\equiv$ ), 75.4 (HC $\equiv$ ), 29.5 (NCH<sub>2</sub>); MS (ES mass):  $m/z$  186.0 (M+1, 40%), 146.1 (M-39, 100%).

### General procedure for the preparation of compound 3 and 4:

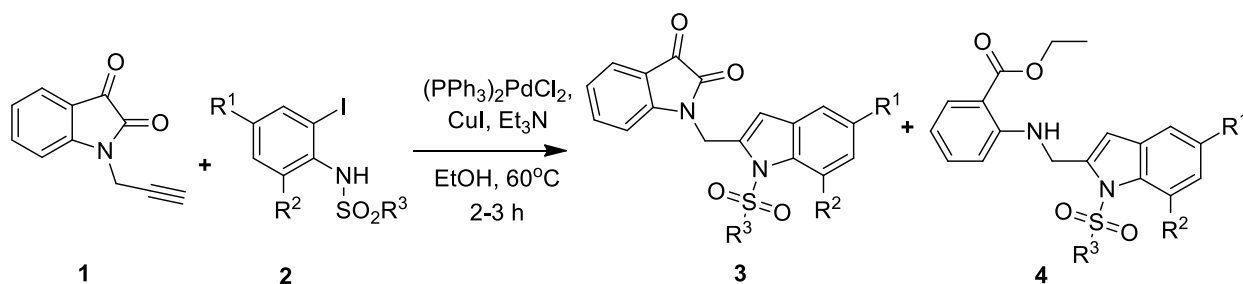

A mixture of compound **1** (1.0 mmol), *o*-iodoanilide **2** (1.2 mmol), (PPh<sub>3</sub>)<sub>2</sub>PdCl<sub>2</sub> (5 mol%), CuI (5 mol%) and triethylamine (3.0 mmol) in ethanol (methanol is used for compounds **4i** and **4j**) (10 mL) was stirred at 60°C for 2-3 h. After completion of the reaction (indicated by TLC) the reaction mixture is diluted with EtOAc (50 mL) and filtered through celite bed. The organic layer was collected, combined, washed with water (3 × 30 mL), dried over anhydrous Na<sub>2</sub>SO<sub>4</sub>, filtered and concentrated under low vacuum. The crude residue was purified by column chromatography on silica gel using 5% EtOAc in hexane to afford the desired product. All the compounds (**3a-k**, **4a-j**) prepared were characterized by MS, NMR spectra and purity was determined by HPLC method.

**1-((5-Chloro-1-tosyl-1H-indol-2-yl)methyl)indoline-2,3-dione (3a)**

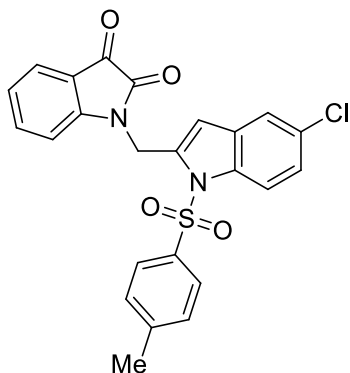

Yellow solid (62% yield); mp: 168-170 °C;  $R_f$  = 0.42 (20% EtOAc/*n*-hexane);  $^1\text{H}$  NMR (400 MHz,  $\text{CDCl}_3$ )  $\delta$ : 8.06 (d,  $J$  = 8.8 Hz, 1H, ArH), 7.73 (d,  $J$  = 8.4 Hz, 2H, ArH), 7.67 (d,  $J$  = 7.2 Hz, 1H, ArH), 7.52 (t,  $J$  = 7.6 Hz, 1H, ArH), 7.32-7.24 (m, 4H, ArH), 7.16 (t,  $J$  = 7.6 Hz, 1H, ArH), 6.73 (d,  $J$  = 8.0 Hz, 1H, ArH), 6.33 (s, 1H, indole (C-3) H), 5.37 (s, 2H,  $\text{NCH}_2$ ), 2.38 (s, 3H,  $\text{ArCH}_3$ );  $^{13}\text{C}$  NMR (100 MHz,  $\text{CDCl}_3$ )  $\delta$ : 182.5 (C=O), 158.1 (C=O), 150.2, 145.8, 138.6, 135.6, 135.0, 134.8, 130.3 (2C), 130.2, 129.8, 126.4 (2C), 125.6, 125.2, 124.3, 120.4, 117.7, 115.6, 110.8, 109.0, 38.9 ( $\text{NCH}_2$ ), 21.6 ( $\text{ArMe}$ ); HPLC: 97.2%, Column: Symmetry C-18 75\*4.6 mm 3.5 $\mu\text{m}$ , mobile phase A: 10 mM Ammonium formate in water, mobile phase B: ACN, (gradient) T/B% : 0/10, 3/10, 15/95, 20/95, 21/10, 25/10; flow rate: 1 mL/min, diluent: ACN:water (80:20), UV: 245.0 nm, retention time 14.5 min; MS (ES mass):  $m/z$  465.0 (M+1, 30%), 318.0 (M-146, 100%).

**1-((5-Bromo-1-tosyl-1H-indol-2-yl)methyl)indoline-2,3-dione (3b)**

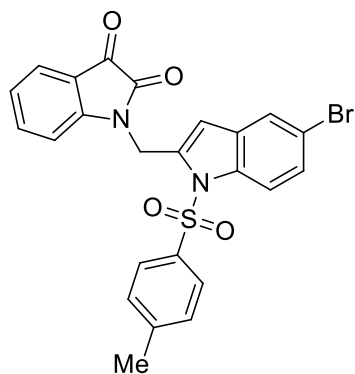

Yellow solid (60% yield); mp: 168-170 °C;  $R_f$  = 0.44 (20% EtOAc/*n*-hexane);  $^1\text{H}$  NMR (400 MHz, DMSO- $d_6$ )  $\delta$ : 7.99 (d,  $J$  = 8.8 Hz, 1H, ArH), 7.87 (d,  $J$  = 8.4 Hz, 2H, ArH), 7.64-7.60 (m, 2H, ArH), 7.55 (dt,  $J$  = 8.0, 1.2 Hz, 1H, ArH), 7.50-7.40 (m, 3H, ArH), 7.15 (t,  $J$  = 7.6 Hz, 1H, ArH), 6.82 (s, 1H, indole (C-3) H), 6.80 (d,  $J$  = 8.0 Hz, 1H, ArH), 5.28 (s, 2H, NCH $_2$ ), 2.33 (s, 3H, ArCH $_3$ );  $^{13}\text{C}$  NMR (100 MHz, DMSO- $d_6$ )  $\delta$ : 183.0 (C=O), 158.8 (C=O), 150.3, 146.6, 138.3, 136.4, 135.8, 134.4, 131.4, 131.0 (2C), 127.8, 126.9 (2C), 125.0, 123.9, 123.8, 118.5, 117.1, 116.4, 111.3, 109.3, 38.2 (NCH $_2$ ), 21.5 (ArMe); HPLC: 99.4%, Column: Cosmicsil Aura ODS C-18 150\*4.6 mm 5 $\mu$ m, mobile phase A: 0.1% TFA in water, mobile phase B: ACN, (gradient) T/B% : 0/30, 20/95, 30/95, 31/30, 35/30; flow rate: 1 mL/min, diluent: ACN:water (80:20), UV: 245.0 nm, retention time 16.4 min; MS (ES mass):  $m/z$  508.8 (M $^+$ , 90%), 510.9 (M+2, 100%).

### 1-((5-Fluoro-1-(4-methylphenyl)sulfonyl-1H-indol-2-yl)methyl)indoline-2,3-dione (3c)

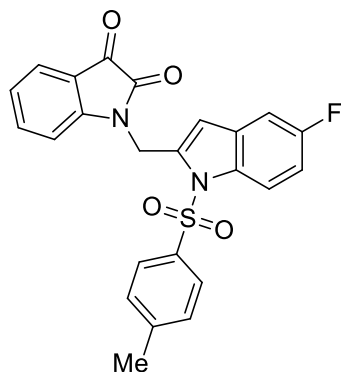

Yellow solid (58% yield); mp: 166-168 °C;  $R_f$  = 0.42 (20% EtOAc/*n*-hexane);  $^1\text{H}$  NMR (400 MHz, DMSO- $d_6$ )  $\delta$ : 8.03 (dd,  $J$  = 9.2, 4.4 Hz, 1H, ArH), 7.88 (s, 1H, ArH), 7.85 (s, 1H, ArH), 7.62 (d,  $J$  = 7.2 Hz, 1H, ArH), 7.55 (dt,  $J$  = 7.6, 1.6 Hz, 1H, ArH), 7.43 (d,  $J$  = 8.0 Hz, 2H,

ArH), 7.23 (dd,  $J = 8.8, 2.8$  Hz, 1H, ArH), 7.20-7.11 (m, 2H, ArH), 6.84 (s, 1H, indole (C-3) H), 6.81 (d,  $J = 7.6$  Hz, 1H, ArH), 5.27 (s, 2H, NCH<sub>2</sub>), 2.34 (s, 3H, ArCH<sub>3</sub>); <sup>13</sup>C NMR (100 MHz, DMSO-*d*<sub>6</sub>)  $\delta$ : 183.0 (C=O), 160.7 (C-F  $J = 237.5$  Hz), 158.9 (C=O), 150.3, 146.5, 138.3, 136.8, 134.4, 133.4, 130.9 (2C), 130.8 (C-F  $J = 10.6$  Hz), 126.9 (2C), 124.9, 123.9, 118.5, 115.9 (C-F  $J = 9.5$  Hz), 113.0 (C-F  $J = 24.0$  Hz), 111.2, 110.0 (C-F  $J = 4.0$  Hz), 107.1 (C-F  $J = 23.8$  Hz), 39.2 (NCH<sub>2</sub>), 21.5 (ArMe); HPLC: 98.0%, Column: Cosmiscal Aura ODS C-18 150\*4.6 mm 5 $\mu$ m, mobile phase A: 0.1% TFA in water, mobile phase B: ACN, (gradient) T/B% : 0/30, 20/95, 30/95, 31/30, 35/30; flow rate: 1 mL/min, diluent: ACN:water (80:20), UV: 240.0 nm, retention time 15.0 min; MS (ES mass):  $m/z$  449.1 (M+1, 100%).

### 1-[(1-Tosyl-1H-indol-2-yl)methyl]indoline-2,3-dione (3d)

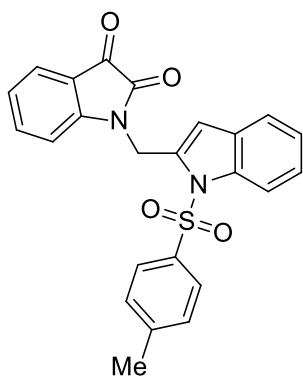

Yellow solid (60% yield); mp: 150-152 °C;  $R_f = 0.4$  (20% EtOAc/*n*-hexane); <sup>1</sup>H NMR (400 MHz, DMSO-*d*<sub>6</sub>)  $\delta$ : 8.02 (d,  $J = 8.4$  Hz, 1H, ArH), 7.88 (d,  $J = 7.6$  Hz, 2H, ArH), 7.65-7.60 (m, 1H, ArH), 7.58-7.52 (m, 1H, ArH), 7.45-7.37 (m, 3H, ArH), 7.34-7.26 (m, 1H, ArH), 7.23-7.17 (m, 1H, ArH), 7.17-7.10 (m, 1H, ArH), 6.85 (s, 1H, indole (C-3) H), 6.81 (d,  $J = 8.0$  Hz, 1H, ArH), 5.28 (s, 2H, NCH<sub>2</sub>), 2.32 (s, 3H, ArCH<sub>3</sub>); <sup>13</sup>C NMR (100 MHz, DMSO-*d*<sub>6</sub>)  $\delta$ : 183.0 (C=O), 158.8 (C=O), 150.4, 146.3, 138.3, 136.9, 134.7, 134.7, 130.9 (2C), 129.5, 126.8 (2C), 125.2, 124.9, 124.4, 123.9, 121.4, 118.5, 114.4, 111.2, 110.2, 39.2 (NCH<sub>2</sub>), 21.5 (ArMe); HPLC: 97.9%, Column: X-Bridge C-18 150\*4.6 mm 5 $\mu$ m, mobile phase A: 0.1% TFA in water, mobile phase B: ACN, (gradient) T/B% : 0/5, 25/90, 35/90, 36/5, 40/5; flow rate: 1 mL/min, diluent: ACN:water (80:20), UV: 240.0 nm, retention time 21.1 min; MS (ES mass):  $m/z$  431.1 (M+1, 70%), 432.2 (M+2, 100%).



**1-[(5-Chloro-1-(methylsulfonyl)-1H-indol-2-yl)methyl]indoline-2,3-dione (3e)**

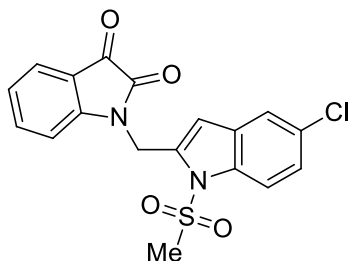

Yellow solid (61% yield); mp: 192-194 °C;  $R_f = 0.25$  (20% EtOAc/*n*-hexane);  $^1\text{H NMR}$  (400 MHz, DMSO- $d_6$ )  $\delta$ : 7.87 (d,  $J = 8.8$  Hz, 1H, ArH), 7.67-7.53 (m, 3H, ArH), 7.36 (dd,  $J = 8.8, 2.4$  Hz, 1H, ArH), 7.19-7.07 (m, 2H, ArH), 6.81 (s, 1H, indole (C-3) H), 5.19 (s, 2H, NCH $_2$ ), 3.61 (s, 3H, SCH $_3$ );  $^{13}\text{C NMR}$  (100 MHz, DMSO- $d_6$ )  $\delta$ : 183.1 (C=O), 158.9 (C=O), 150.4, 138.3, 136.7, 135.3, 130.5, 128.4, 124.9, 124.6, 123.9, 120.5, 118.5, 115.4, 111.9, 107.4, 41.7 (SMe), 38.8 (NCH $_2$ ); HPLC: 98.4%, Column: X-Bridge C-18 150\*4.6 mm 5 $\mu\text{m}$ , mobile phase A: 5 mM Ammonium acetate in water, mobile phase B: ACN, (gradient) T/B% : 0/5, 20/90, 30/90, 31/5, 35/5; flow rate: 1 mL/min, diluent: ACN:water (80:20), UV: 225.0 nm, retention time 16.1 min; MS (ES mass):  $m/z$  389.0 (M+1, 100%); HRMS (ESI)  $m/z$ : [M + Na] $^+$  Calculated for C $_{18}$ H $_{13}$ ClN $_2$ NaO $_4$ S: 411.0177, Found: 411.0180.

**1-[(1-(Phenylsulfonyl)-1H-indol-2-yl)methyl]indoline-2,3-dione (3f)**

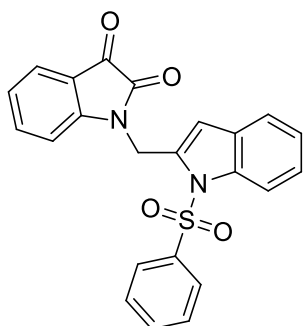

Yellow solid (60% yield); mp: 172-174 °C;  $R_f = 0.31$  (20% EtOAc/*n*-hexane);  $^1\text{H NMR}$  (400 MHz, DMSO- $d_6$ )  $\delta$ : 8.05 (d,  $J = 8.0$  Hz, 1H, ArH), 8.02-7.89 (m, 2H, ArH), 7.75 (t,  $J = 7.2$  Hz, 1H, ArH), 7.70-7.60 (m, 3H, ArH), 7.56 (t,  $J = 7.6$  Hz, 1H, ArH), 7.43 (d,  $J = 7.6$  Hz, 1H, ArH),

7.34 (t,  $J = 7.6$  Hz, 1H, ArH), 7.22 (t,  $J = 7.6$  Hz, 1H, ArH), 7.16 (t,  $J = 7.6$  Hz, 1H, ArH), 6.89 (s, 1H, indole (C-3) H), 6.82 (d,  $J = 8.0$  Hz, 1H, ArH), 5.30 (s, 2H, NCH<sub>2</sub>); <sup>13</sup>C NMR (100 MHz, DMSO-*d*<sub>6</sub>)  $\delta$ : 183.1 (C=O), 158.9 (C=O), 150.4, 138.4, 137.6, 137.0, 135.4, 134.8, 130.5 (2C), 129.5, 126.8 (2C), 125.3, 125.0, 124.6, 123.9, 121.5, 118.6, 114.5, 111.2, 110.3, 39.3 (NCH<sub>2</sub>); HPLC: 97.9%, Column: Cosmiscal Aura ODS C-18 150\*4.6 mm 5 $\mu$ m, mobile phase A: 0.1% TFA in water, mobile phase B: ACN, (gradient) T/B% : 0/10, 20/95, 27/95, 31/10, 35/10; flow rate: 1 mL/min, diluent: ACN:water (80:20), UV: 245.0 nm, retention time 17.3 min; MS (ES mass):  $m/z$  415.2 (M-1, 100%); HRMS (ESI)  $m/z$ : [M + Na]<sup>+</sup> Calculated for C<sub>23</sub>H<sub>16</sub>N<sub>2</sub>NaO<sub>4</sub>S: 439.0723, Found: 439.0728.

### 1-[[1-(Thiophen-2-ylsulfonyl)-1H-indol-2-yl]methyl]indoline-2,3-dione (3g)

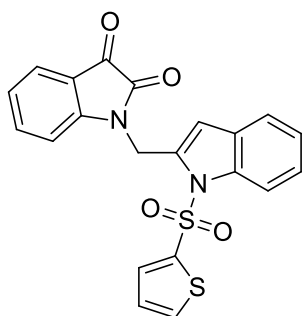

Yellow solid (59% yield); mp: 194-196 °C;  $R_f = 0.32$  (20% EtOAc/*n*-hexane); <sup>1</sup>H NMR (400 MHz, DMSO-*d*<sub>6</sub>)  $\delta$ : 8.11-7.97 (m, 3H, ArH), 7.64 (d,  $J = 7.2$  Hz, 1H, ArH), 7.61-7.53 (m, 1H, ArH), 7.44 (d,  $J = 7.6$  Hz, 1H, ArH), 7.38 (t,  $J = 7.6$  Hz, 1H, ArH), 7.30-7.20 (m, 2H, ArH), 7.16 (t,  $J = 7.6$  Hz, 1H, ArH), 6.91 (s, 1H, indole (C-3) H), 6.86 (d,  $J = 8.0$  Hz, 1H, ArH), 5.26 (s, 2H, NCH<sub>2</sub>); <sup>13</sup>C NMR (100 MHz, DMSO-*d*<sub>6</sub>)  $\delta$ : 182.6 (C=O), 158.3 (C=O), 149.9, 137.9, 136.4 (2C), 136.3, 134.2, 134.1, 129.3, 128.3, 124.9, 124.5, 124.3, 123.4, 121.1, 118.1, 114.1, 110.8, 110.4, 38.8 (NCH<sub>2</sub>); HPLC: 99.6%, Column: X-Bridge C-18 150\*4.6 mm 5 $\mu$ m, mobile phase A: 5 mM Ammonium acetate in water, mobile phase B: ACN, (gradient) T/B% : 0/20, 20/90, 30/90, 31/20, 35/20; flow rate: 1 mL/min, diluent: ACN:THF, UV: 245.0 nm, retention time 14.9 min; MS (ES mass):  $m/z$  422.9 (M<sup>+</sup>, 70%), 275.9 (M-146, 100%).

### 1-[(1-(Methylsulfonyl)-1H-indol-2-yl)methyl]indoline-2,3-dione (3h)

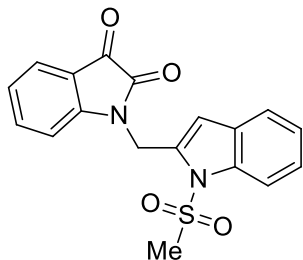

Yellow solid (62% yield); mp: 176-178 °C;  $R_f$  = 0.25 (20% EtOAc/*n*-hexane);  $^1\text{H}$  NMR (400 MHz, DMSO- $d_6$ )  $\delta$ : 7.89 (d,  $J$  = 8.0 Hz, 1H, ArH), 7.67-7.57 (m, 2H, ArH), 7.50 (d,  $J$  = 7.6 Hz, 1H, ArH), 7.38-7.31 (m, 1H, ArH), 7.26 (m, 1H, ArH), 7.17 (t,  $J$  = 7.6 Hz, 1H, ArH), 7.12 (d,  $J$  = 8.0 Hz, 1H, ArH), 6.83 (s, 1H, indole (C-3) H), 5.20 (s, 2H, NCH $_2$ ), 3.57 (s, 3H, SCH $_3$ );  $^{13}\text{C}$  NMR (100 MHz, DMSO- $d_6$ )  $\delta$ : 182.7 (C=O), 158.4 (C=O), 150.1, 137.9, 136.4, 134.4, 128.7, 124.4, 124.4, 123.5, 123.4, 120.8, 118.1, 113.4, 111.3, 107.7, 41.7 (SMe), 38.4 (NCH $_2$ ); HPLC: 99.1%, Column: Cosmisil Aura ODS C-18 150\*4.6 mm 5 $\mu\text{m}$ , mobile phase A: 0.1% TFA in water, mobile phase B: ACN, (gradient) T/B% : 0/10, 20/95, 37/95, 40/10, 45/10; flow rate: 1 mL/min, diluent: ACN:water (80:20), UV: 245.0 nm, retention time 15.3 min; MS (ES mass):  $m/z$  355.0 (M+1, 30%), 208.0 (M-146, 100%).

### 1-((5,7-Dimethyl-1-tosyl-1H-indol-2-yl)methyl)indoline-2,3-dione (3i)

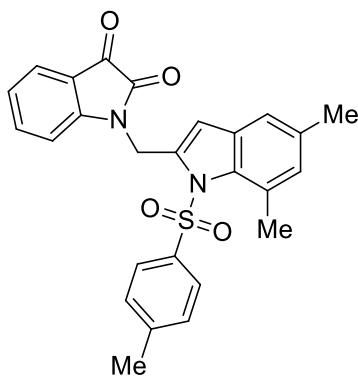

Yellow solid (68% yield); mp: >200 °C;  $R_f$  = 0.46 (20% EtOAc/*n*-hexane);  $^1\text{H}$  NMR (400 MHz, DMSO- $d_6$ )  $\delta$ : 7.60 (d,  $J$  = 7.6 Hz, 1H, ArH), 7.57-7.50 (m, 1H, ArH), 7.47 (d,  $J$  = 7.6 Hz, 2H, ArH), 7.30 (d,  $J$  = 8.0 Hz, 2H, ArH), 7.13 (t,  $J$  = 7.6 Hz, 1H, ArH), 6.95 (s, 1H, ArH), 6.91 (s,

<sup>1</sup>H, ArH), 6.81-6.77 (m, 2H, indole (C-3) H, ArH), 5.17 (s, 2H, NCH<sub>2</sub>), 2.59 (s, 3H, ArCH<sub>3</sub>), 2.31 (s, 3H, ArCH<sub>3</sub>), 2.26 (s, 3H, ArCH<sub>3</sub>); <sup>13</sup>C NMR (100 MHz, DMSO-*d*<sub>6</sub>) δ: 182.7 (C=O), 158.4 (C=O), 149.9, 145.1, 137.8, 137.5, 137.0, 135.9, 134.5, 133.0, 130.0, 129.7 (2C), 127.3, 126.2 (2C), 124.4, 123.3, 118.8, 118.0, 115.2, 110.8, 39.8 (NCH<sub>2</sub>), 21.5 (ArMe), 21.0 (ArMe), 20.4 (ArMe); HPLC: 98.8%, Column: X-Bridge C-18 150\*4.6 mm 5μm, mobile phase A: 5 mM Ammonium acetate in water, mobile phase B: ACN, (gradient) T/B% : 0/10, 23/90, 30/90, 31/10, 35/10; flow rate: 1 mL/min, diluent: DMSO, UV: 245.0 nm, retention time 16.4 min; MS (ES mass): *m/z* 459.1 (M+1, 40%), 312.1 (M-146, 100%).

**1-((5,7-Dimethyl-1-(methylsulfonyl)-1*H*-indol-2-yl)methyl)indoline-2,3-dione (3j)**

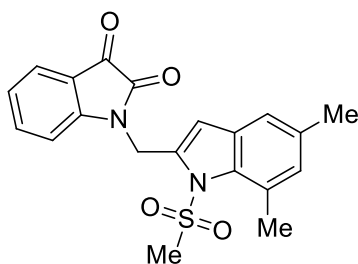

Yellow solid (70% yield); mp: 140-142 °C; *R<sub>f</sub>* = 0.29 (20% EtOAc/*n*-hexane); <sup>1</sup>H NMR (400 MHz, DMSO-*d*<sub>6</sub>) δ: 7.61 (d, *J* = 7.2 Hz, 1H, ArH), 7.60-7.54 (m, 1H, ArH), 7.14 (t, *J* = 7.2 Hz, 1H, ArH), 7.06 (s, 1H, ArH), 6.98-6.93 (m, 2H, ArH), 6.84 (s, 1H, indole (C-3) H), 5.16 (s, 2H, NCH<sub>2</sub>), 3.52 (s, 3H, SCH<sub>3</sub>), 2.62 (s, 3H, ArCH<sub>3</sub>), 2.29 (s, 3H, ArCH<sub>3</sub>); <sup>13</sup>C NMR (100 MHz, DMSO-*d*<sub>6</sub>) δ: 182.8 (C=O), 158.4 (C=O), 149.9, 137.8, 136.9, 136.1, 133.5, 131.6, 129.7, 125.4, 124.4, 123.4, 118.7, 118.1, 111.4, 111.1, 41.3 (SMe), 39.2 (NCH<sub>2</sub>), 21.6 (ArMe), 20.4 (ArMe); HPLC: 97.3%, Column: X-Bridge C-18 150\*4.6 mm 3.5μm, mobile phase A: 0.1% TFA in water PH-3 with OPA, mobile phase B: ACN, (gradient) T/B% : 0/10, 3/10, 15/95, 23/95, 25/10, 30/10; flow rate: 1 mL/min, diluent: ACN:water (20:80), UV: 210.0 nm, retention time 13.7 min; MS (ES mass): *m/z* 383.1 (M+1, 20%), 236.1 (M-146, 100%).

**1-((5,7-Dimethyl-1-(phenylsulfonyl)-1*H*-indol-2-yl)methyl)indoline-2,3-dione (3k)**

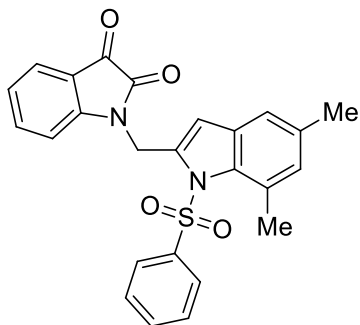

Yellow solid (68% yield); mp: >200 °C;  $R_f$ =0.47 (20% EtOAc/*n*-hexane);  $^1\text{H}$  NMR (400 MHz, DMSO- $d_6$ )  $\delta$ : 7.65 (t,  $J$  = 7.6 Hz, 1H, ArH), 7.62-7.47 (m, 6H, ArH), 7.13 (t,  $J$  = 7.6 Hz, 1H, ArH), 6.95 (s, 1H, ArH), 6.91 (s, 1H, ArH), 6.81 (s, 1H, indole (C-3) H), 6.80 (d,  $J$  = 8.0 Hz, 1H, ArH), 5.18 (s, 2H, NCH $_2$ ), 2.59 (s, 3H, ArCH $_3$ ), 2.26 (s, 3H, ArCH $_3$ );  $^{13}\text{C}$  NMR (100 MHz, DMSO- $d_6$ )  $\delta$ : 182.7 (C=O), 158.4 (C=O), 149.8, 137.8, 137.6, 137.0, 135.7, 134.6, 134.4, 132.9, 130.0, 129.3 (2C), 127.2, 126.2 (2C), 124.4, 123.3, 118.9, 118.0, 115.2, 110.8, 39.1 (NCH $_2$ ), 21.4 (ArMe), 20.4 (ArMe); HPLC: 98.9%, Column: Cosmicsil C-18 150\*4.6 mm 5 $\mu\text{m}$ , mobile phase A: 5 mM Ammonium acetate in water, mobile phase B: ACN, (gradient) T/B% : 0/5, 20/90, 25/90, 26/5, 30/5; flow rate: 1 mL/min, diluent: ACN:water (80:20), UV: 240.0 nm, retention time 18.2 min; MS (ES mass):  $m/z$  445.1 (M+1, 30%), 298.0 (M-146, 100%).

#### Ethyl 2-[(5-chloro-1-tosyl-1*H*-indol-2-yl)methyl]amino]benzoate (4a)

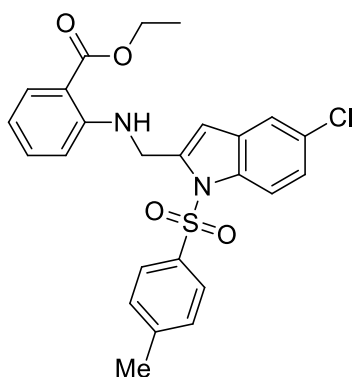

White solid (28% yield); mp: 126-128 °C;  $R_f$ =0.36 (5% EtOAc/*n*-hexane);  $^1\text{H}$  NMR (400 MHz, DMSO- $d_6$ )  $\delta$ : 8.26 (t,  $J$  = 6.4 Hz, 1H, NH, D $_2$ O exchangeable), 8.00 (d,  $J$  = 8.8 Hz, 1H, ArH), 7.84-7.78 (m, 3H, ArH), 7.60 (d,  $J$  = 2.0 Hz, 1H, ArH), 7.37 (d,  $J$  = 8.0 Hz, 2H, ArH), 7.31 (dd,  $J$  = 8.8, 2.4 Hz, 1H, ArH), 7.29-7.24 (m, 1H, ArH), 6.66 (s, 1H, indole (C-3) H), 6.63-6.58 (m,



2H, ArH), 4.90 (d,  $J = 6.4$  Hz, 2H, NCH<sub>2</sub>), 4.28 (q,  $J = 7.2$  Hz, 2H, OCH<sub>2</sub>), 2.33 (s, 3H, ArCH<sub>3</sub>), 1.32 (t,  $J = 7.2$  Hz, 3H, CH<sub>2</sub>CH<sub>3</sub>); <sup>13</sup>C NMR (100 MHz, DMSO-*d*<sub>6</sub>)  $\delta$ : 167.6 (C=O), 149.7, 145.8, 140.4, 134.9, 134.6, 134.3, 131.2, 130.5, 130.3 (2C), 128.3, 126.5 (2C), 124.3, 120.4, 115.5, 115.1, 111.7, 110.1, 109.5, 60.2 (OCH<sub>2</sub>), 40.5 (NCH<sub>2</sub>), 21.0 (ArMe), 14.2 (CH<sub>2</sub>Me); HPLC: 97.1%, Column: X-Bridge C-18 150\*4.6 mm 5 $\mu$ m, mobile phase A: 5 Mm Ammonium acetate in water, mobile phase B: ACN, (gradient) T/B% : 0/20, 20/90, 30/90, 31/20, 35/20; flow rate: 1 mL/min, diluent: THF:ACN:H<sub>2</sub>O, UV: 220.0 nm, retention time 22.8 min; MS (ES mass):  $m/z$  482.9 (M<sup>+</sup>, 100%).

### Ethyl 2-[[5-bromo-1-tosyl-1*H*-indol-2-yl)methyl]amino]benzoate (4b)

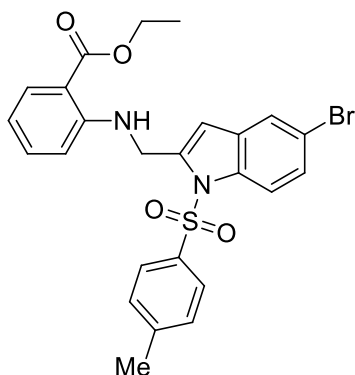

White solid (30% yield); mp: 117-119 °C;  $R_f = 0.39$  (5% EtOAc/*n*-hexane); <sup>1</sup>H NMR (400 MHz, DMSO-*d*<sub>6</sub>)  $\delta$ : 8.25 (t,  $J = 6.4$  Hz, 1H, NH, D<sub>2</sub>O exchangeable), 7.94 (d,  $J = 8.8$  Hz, 1H, ArH), 7.85-7.77 (m, 3H, ArH), 7.72 (d,  $J = 1.6$  Hz, 1H, ArH), 7.42 (dd,  $J = 8.8, 2.0$  Hz, 1H, ArH), 7.37 (d,  $J = 8.0$  Hz, 2H, ArH), 7.29-7.22 (m, 1H, ArH), 6.64 (s, 1H, indole (C-3) H), 6.59 (t,  $J = 7.6$  Hz, 2H, ArH), 4.89 (d,  $J = 6.4$  Hz, 2H, NCH<sub>2</sub>), 4.27 (q,  $J = 7.2$  Hz, 2H, OCH<sub>2</sub>), 2.32 (s, 3H, ArCH<sub>3</sub>), 1.31 (t,  $J = 7.2$  Hz, 3H, CH<sub>2</sub>CH<sub>3</sub>); <sup>13</sup>C NMR (100 MHz, DMSO-*d*<sub>6</sub>)  $\delta$ : 168.0 (C=O), 150.2, 146.3, 140.7, 135.7, 135.0, 134.7, 131.7, 131.5, 130.8 (2C), 127.4, 126.9 (2C), 123.9, 116.9, 116.3, 115.5, 112.2, 110.5, 110.0, 60.6 (OCH<sub>2</sub>), 41.0 (NCH<sub>2</sub>), 21.5 (ArMe), 14.6 (CH<sub>2</sub>Me); HPLC: 97.1%, Column: X-Bridge C-18 150\*4.6 mm 5 $\mu$ m, mobile phase A: 5 mM Ammonium acetate in water, mobile phase B: ACN, (gradient) T/B% : 0/20, 20/90, 30/90, 31/20, 35/20; flow rate: 1 mL/min, diluent: ACN:H<sub>2</sub>O (80:20), UV: 220.0 nm, retention time 22.5 min; MS (ES mass):  $m/z$  526.0 (M<sup>+</sup>, 90%), 528.9 (M<sup>+2</sup>, 100%).

**Ethyl 2-[(5-fluoro-1-tosyl-1H-indol-2-yl)methyl]amino]benzoate (4c)**

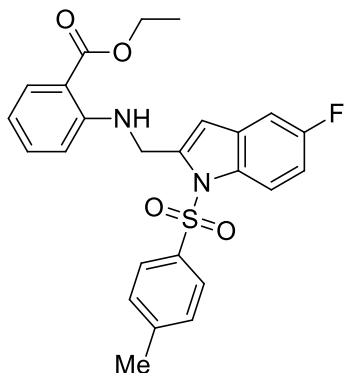

White solid (31% yield); mp: 131-133 °C;  $R_f$ =0.32 (5% EtOAc/*n*-hexane);  $^1\text{H}$  NMR (400 MHz, DMSO- $d_6$ )  $\delta$ : 8.25 (t,  $J$  = 6.0 Hz, 1H, NH, D<sub>2</sub>O exchangeable), 8.00 (dd,  $J$  = 9.2, 4.4 Hz, 1H, ArH), 7.87-7.75 (m, 3H, ArH), 7.41-7.31 (m, 3H, ArH), 7.31-7.24 (m, 1H, ArH), 7.17-7.08 (m, 1H, ArH), 6.67 (s, 1H, indole (C-3) H), 6.65-6.56 (m, 2H, ArH), 4.90 (d,  $J$  = 6.0 Hz, 2H, NCH<sub>2</sub>), 4.28 (q,  $J$  = 7.2 Hz, 2H, OCH<sub>2</sub>), 2.33 (s, 3H, ArCH<sub>3</sub>), 1.32 (t,  $J$  = 7.2 Hz, 3H, CH<sub>2</sub>CH<sub>3</sub>);  $^{13}\text{C}$  NMR (100 MHz, DMSO- $d_6$ )  $\delta$ : 167.5 (C=O), 160.2 (d, C-F  $J$  = 236.9 Hz), 149.7, 147.8, 145.7, 140.6, 134.5 (d, C-F  $J$  = 21.2 Hz), 132.9, 131.8, 131.2, 130.3 (2C), 130.2, 126.4 (2C), 115.4 (d, C-F  $J$  = 9.7 Hz), 115.1, 112.2 (C-F  $J$  = 25.2 Hz), 111.7, 110.1 (d, C-F  $J$  = 5.6 Hz), 106.7 (d, C-F  $J$  = 23.8 Hz), 60.1 (OCH<sub>2</sub>), 40.5 (NCH<sub>2</sub>), 21.0 (ArMe), 14.1 (CH<sub>2</sub>Me); HPLC: 97.0%, Column: Eclipse plus C-18 250\*4.6 mm 5 $\mu$ m, mobile phase A: 5 mM Ammonium acetate in water, mobile phase B: ACN, (gradient) T/B% : 0/30, 30/90, 40/90, 41/30, 45/30; flow rate: 1 mL/min, diluent: ACN:THF, UV: 220.0 nm, retention time 31.3 min; MS (ES mass):  $m/z$  467.0 (M+1, 100%).

**Ethyl 2-[(1-tosyl-1H-indol-2-yl)methyl]amino]benzoate (4d)**

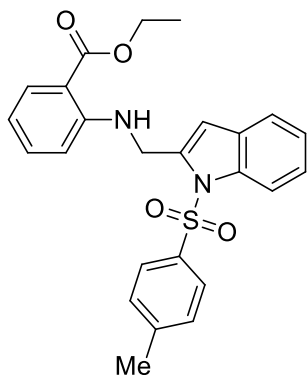

White solid (25% yield); mp: 93-95 °C;  $R_f$  = 0.35 (5% EtOAc/*n*-hexane);  $^1\text{H}$  NMR (400 MHz,  $\text{CDCl}_3$ )  $\delta$ : 8.15 (d,  $J$  = 8.4 Hz, 1H, ArH), 7.95 (dd,  $J$  = 8.0, 1.6 Hz, 1H, ArH), 7.67 (d,  $J$  = 8.4 Hz, 2H, ArH), 7.39 (d,  $J$  = 7.6 Hz, 1H, ArH), 7.33-7.26 (m, 2H, ArH), 7.26-7.16 (m, 4H, ArH), 6.65 (m, 2H, ArH, NH ( $\text{D}_2\text{O}$  exchangeable)), 6.55 (s, 1H, indole (C-3) H), 4.85 (s, 2H,  $\text{NCH}_2$ ), 4.32 (q,  $J$  = 7.2 Hz, 2H,  $\text{OCH}_2$ ), 2.35 (s, 3H,  $\text{ArCH}_3$ ), 1.38 (t,  $J$  = 7.2 Hz, 3H,  $\text{CH}_2\text{CH}_3$ );  $^{13}\text{C}$  NMR (100 MHz,  $\text{CDCl}_3$ )  $\delta$ : 168.4 (C=O), 149.0, 145.0, 137.5, 135.9, 134.5, 131.6, 129.9 (2C), 129.2, 126.4 (2C), 124.5, 123.6, 120.8, 116.6, 114.4, 112.9, 112.8, 110.5, 110.3, 60.6 ( $\text{OCH}_2$ ), 42.5 ( $\text{NCH}_2$ ), 21.6 (ArMe), 14.3 ( $\text{CH}_2\text{Me}$ ); HPLC: 99.9%, Column: X-Bridge C-18 150\*4.6 mm 5 $\mu\text{m}$ , mobile phase A: 0.1% TFA in water, mobile phase B: ACN, (gradient) T/B% : 0/5, 20/90, 30/90, 31/5, 35/5; flow rate: 1 mL/min, diluent: ACN:H<sub>2</sub>O (80:20), UV: 220.0 nm, retention time 21.3 min; MS (ES mass):  $m/z$  449.0 (M+1, 100%).

#### Ethyl 2-[[5-chloro-1-(methylsulfonyl)-1H-indol-2-yl]methyl]amino]benzoate (4e)

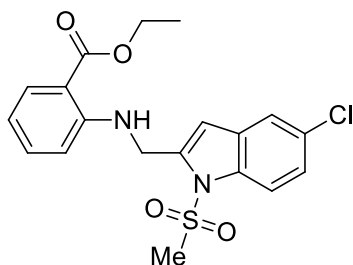

White solid (28% yield); mp: 94-96 °C;  $R_f$  = 0.35 (5% EtOAc/*n*-hexane);  $^1\text{H}$  NMR (400 MHz,  $\text{DMSO-}d_6$ )  $\delta$ : 8.21 (t,  $J$  = 6.4 Hz, 1H, NH,  $\text{D}_2\text{O}$  exchangeable), 7.88-7.79 (m, 2H, ArH), 7.67 (d,  $J$  = 2.0 Hz, 1H, ArH), 7.38-7.30 (m, 2H, ArH), 6.88 (d,  $J$  = 8.8 Hz, 1H, ArH), 6.68 (s, 1H, indole (C-3) H), 6.61 (t,  $J$  = 7.6 Hz, 1H, ArH), 4.81 (d,  $J$  = 6.4 Hz, 2H,  $\text{NCH}_2$ ), 4.27 (q,  $J$  = 7.2

Hz, 2H, OCH<sub>2</sub>), 3.44 (s, 3H, SCH<sub>3</sub>), 1.31 (t,  $J = 7.2$  Hz, 3H, CH<sub>2</sub>CH<sub>3</sub>); <sup>13</sup>C NMR (100 MHz, DMSO-*d*<sub>6</sub>) δ: 168.1 (C=O), 150.3, 140.7, 135.2, 135.7, 131.7, 130.6, 128.3, 124.5, 120.7, 115.6, 115.5, 112.4, 110.4, 108.5, 60.7 (OCH<sub>2</sub>), 41.5 (SMe), 40.5 (NCH<sub>2</sub>), 14.6 (CH<sub>2</sub>Me); HPLC: 99.5%, Column: X-Bridge C-18 150\*4.6 mm 5μm, mobile phase A: 0.1% TFA in water, mobile phase B: ACN, (gradient) T/B% : 0/5, 20/90, 30/90, 31/5, 35/5; flow rate: 1 mL/min, diluent: ACN:H<sub>2</sub>O (80:20), UV: 225.0 nm, retention time 20.2 min; MS (ES mass):  $m/z$  407.1 (M+1, 30%), 242.0 (M-164, 100%).

**Ethyl 2-[[1-(phenylsulfonyl)-1H-indol-2-yl]methyl]amino]benzoate (4f)**

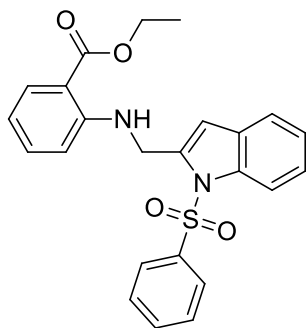

White solid (30% yield); mp: 102-104 °C;  $R_f = 0.40$  (5% EtOAc/*n*-hexane); <sup>1</sup>H NMR (400 MHz, DMSO-*d*<sub>6</sub>) δ: 8.28 (t,  $J = 6.4$  Hz, 1H, NH, D<sub>2</sub>O exchangeable), 8.01 (d,  $J = 8.4$  Hz, 1H, ArH), 7.94-7.88 (m, 2H, ArH), 7.83 (dd,  $J = 8.0, 1.6$  Hz, 1H, ArH), 7.72-7.67 (m, 1H, ArH), 7.55 (m, 2H, ArH), 7.50 (d,  $J = 7.6$  Hz, 1H, ArH), 7.30 (m, 2H, ArH), 7.24-7.19 (m, 1H, ArH), 6.73 (s, 1H, indole (C-3) H), 6.68 (d,  $J = 8.4$  Hz, 1H, ArH), 6.64-6.58 (m, 1H, ArH), 4.92 (d,  $J = 6.4$  Hz, 2H, NCH<sub>2</sub>), 4.28 (q,  $J = 7.2$  Hz, 2H, OCH<sub>2</sub>), 1.32 (t,  $J = 7.2$  Hz, 3H, CH<sub>2</sub>CH<sub>3</sub>); <sup>13</sup>C NMR (100 MHz, DMSO-*d*<sub>6</sub>) δ: 168.0 (C=O), 150.3, 139.0, 137.9, 136.9, 135.1, 135.1, 131.7, 130.3 (2C), 129.5, 126.8 (2C), 125.1, 124.3, 121.5, 115.5, 114.5, 112.2, 111.0, 110.6, 60.6 (OCH<sub>2</sub>), 40.9 (NCH<sub>2</sub>), 14.6 (CH<sub>2</sub>Me); HPLC: 95.1%, Column: Eclipse XDB C-18 150\*4.6 mm 5μm, mobile phase A: 0.05% TFA in water, mobile phase B: 0.05% TFA in ACN, (gradient) T/B% : 0/10, 5/10, 25/90, 30/90, 31/10, 35/10; flow rate: 1 mL/min, diluent: ACN:H<sub>2</sub>O (80:20), UV: 218.0 nm, retention time 26.5 min; MS (ES mass):  $m/z$  435.0 (M+1, 100%).

### Ethyl 2-[(1-(thiophen-2-ylsulfonyl)-1H-indol-2-yl)methyl]amino]benzoate (4g)

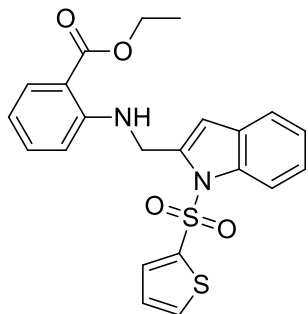

White solid (30% yield); mp: 92-94 °C;  $R_f$  = 0.35 (5% EtOAc/*n*-hexane);  $^1\text{H}$  NMR (400 MHz, DMSO- $d_6$ )  $\delta$ : 8.27 (t,  $J$  = 6.4 Hz, 1H, NH, D<sub>2</sub>O exchangeable), 8.06-7.97 (m, 2H, ArH), 7.93 (dd,  $J$  = 4.0, 1.6 Hz, 1H, ArH), 7.84 (dd,  $J$  = 8.0, 2.0 Hz, 1H, ArH), 7.52 (d,  $J$  = 7.6 Hz, 1H, ArH), 7.38-7.28 (m, 2H, ArH), 7.27-7.22 (m, 1H, ArH), 7.16 (dd,  $J$  = 4.85, 4.0 Hz, 1H, ArH), 6.73 (2s, 2H, indole (C-3) H, ArH), 6.64-6.58 (m, 1H, ArH), 4.88 (d,  $J$  = 6.4 Hz, 2H, NCH<sub>2</sub>), 4.29 (q,  $J$  = 7.2 Hz, 2H, OCH<sub>2</sub>), 1.32 (t,  $J$  = 7.2 Hz, 3H, CH<sub>2</sub>CH<sub>3</sub>);  $^{13}\text{C}$  NMR (100 MHz, DMSO- $d_6$ )  $\delta$ : 167.6 (C=O), 149.8, 138.3, 136.6, 136.2, 135.9, 134.6, 134.1, 131.2, 129.2, 128.1, 124.7, 124.1, 121.1, 115.0, 114.2, 111.7, 111.1, 110.1, 60.2 (OCH<sub>2</sub>), 40.5 (NCH<sub>2</sub>), 14.6 (CH<sub>2</sub>Me); HPLC: 99.2%, Column: X-Bridge C-18 150\*4.6 mm 5 $\mu$ m, mobile phase A: 5 mM Ammonium acetate in water, mobile phase B: ACN, (gradient) T/B% : 0/20, 20/90, 30/90, 31/20, 35/20; flow rate: 1 mL/min, diluent: ACN:H<sub>2</sub>O (80:20), UV: 220.0 nm, retention time 19.6 min; MS (ES mass):  $m/z$  440.9 (M<sup>+</sup>, 80%), 275.9 (M-164, 100%).

### Ethyl 2-[(1-(methylsulfonyl)-1H-indol-2-yl)methyl]amino]benzoate (4h)

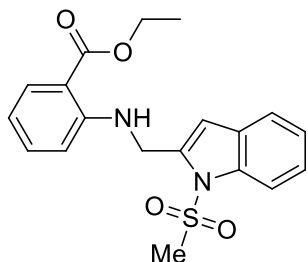

White solid (30% yield); mp: 82-84 °C;  $R_f$  = 0.32 (5% EtOAc/*n*-hexane);  $^1\text{H}$  NMR (400 MHz, DMSO- $d_6$ )  $\delta$ : 8.22 (t,  $J$  = 6.4 Hz, 1H, NH, D<sub>2</sub>O exchangeable), 7.92-7.80 (m, 2H, ArH), 7.58 (d,

$J = 7.6$  Hz, 1H, ArH), 7.39-7.29 (m, 2H, ArH), 7.28-7.22 (m, 1H, ArH), 6.93 (d,  $J = 8.8$  Hz, 1H, ArH), 6.74 (s, 1H, indole (C-3) H), 6.65-6.58 (m, 1H, ArH), 4.82 (d,  $J = 6.4$  Hz, 2H, NCH<sub>2</sub>), 4.29 (q,  $J = 7.2$  Hz, 2H, OCH<sub>2</sub>), 3.40 (s, 3H, SCH<sub>3</sub>), 1.32 (t,  $J = 7.2$  Hz, 3H, CH<sub>2</sub>CH<sub>3</sub>); <sup>13</sup>C NMR (100 MHz, CDCl<sub>3</sub>)  $\delta$ : 167.7 (C=O), 149.9, 138.4, 136.3, 134.7, 131.2, 128.6, 124.2, 123.4, 120.9, 115.0, 113.5, 111.9, 109.9, 109.0, 60.2 (OCH<sub>2</sub>), 40.8 (NCH<sub>2</sub>), 40.1 (SMe), 14.6 (CH<sub>2</sub>Me); HPLC: 99.8%, Column: X-Bridge C-18 150\*4.6 mm 5 $\mu$ m, mobile phase A: 5 mM Ammonium acetate in water, mobile phase B: ACN, (gradient) T/B% : 0/30, 30/90, 40/90, 41/5, 45/5; flow rate: 1 mL/min, diluent: ACN:THF, UV: 220.0 nm, retention time 22.0 min; MS (ES mass):  $m/z$  373.0 (M+1, 40%), 207.9 (M-164, 100%).

#### Methyl 2-[(1-(methylsulfonyl)-1H-indol-2-yl)methyl]amino]benzoate (4i)

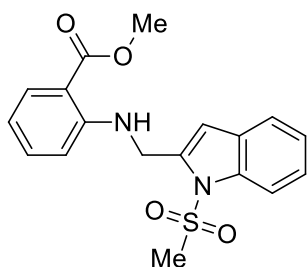

White solid (25% yield); mp: 130-132 °C;  $R_f = 0.34$  (10% EtOAc/*n*-hexane); <sup>1</sup>H NMR (400 MHz, DMSO-*d*<sub>6</sub>)  $\delta$ : 8.21 (t,  $J = 6.4$  Hz, 1H, NH, D<sub>2</sub>O exchangeable), 7.88 (d,  $J = 8.4$  Hz, 1H, ArH), 7.83 (dd,  $J = 8.0, 1.6$  Hz, 1H, ArH), 7.58 (d,  $J = 7.6$  Hz, 1H, ArH), 7.40-7.22 (m, 3H, ArH), 6.94 (d,  $J = 8.4$  Hz, 1H, ArH), 6.74 (s, 1H, indole (C-3) H), 6.66-6.58 (m, 1H, ArH), 4.82 (d,  $J = 6.4$  Hz, 2H, NCH<sub>2</sub>), 3.82 (s, 3H, OCH<sub>3</sub>), 3.40 (s, 3H, SCH<sub>3</sub>); <sup>13</sup>C NMR (100 MHz, CDCl<sub>3</sub>)  $\delta$ : 168.9 (C=O), 139.5, 137.7, 137.0, 134.8, 131.8, 129.9, 129.0, 127.3, 124.9, 123.8, 122.4, 121.1, 113.8, 110.7, 51.8 (OMe), 41.0 (NCH<sub>2</sub>), 40.2 (SMe); HPLC: 99.4%, Column: Eclipse plus C-18 250\*4.6 mm 5 $\mu$ m, mobile phase A: 5 mM Ammonium acetate in water, mobile phase B: ACN, (gradient) T/B% : 0/30, 20/90, 30/90, 31/30, 35/30; flow rate: 1 mL/min, diluent: ACN:H<sub>2</sub>O (80:20), UV: 215.0 nm, retention time 18.1 min; MS (ES mass):  $m/z$  359.0 (M+1, 30%), 208.0 (M-150, 100%).

#### Methyl 2-[(5-chloro-1-tosyl-1H-indol-2-yl)methyl]amino]benzoate (4j)

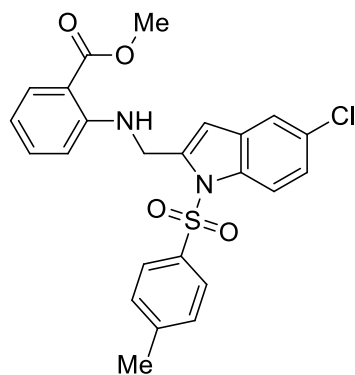

White solid (26% yield); mp: 84-86 °C;  $R_f$ =0.40 (10% EtOAc/*n*-hexane);  $^1\text{H}$  NMR (400 MHz, DMSO- $d_6$ )  $\delta$ : 8.24 (t,  $J$  = 6.4 Hz, 1H, NH, D $_2$ O exchangeable), 8.01 (d,  $J$  = 9.2 Hz, 1H, ArH), 7.78-7.85 (m, 3H, ArH), 7.59 (d,  $J$  = 2.0 Hz, 1H, ArH), 7.37 (d,  $J$  = 8.4 Hz, 2H, ArH), 7.34-7.24 (m, 2H, ArH), 6.65 (s, 1H, indole (C-3) H), 6.64-6.57 (m, 2H, ArH), 4.90 (d,  $J$  = 6.4 Hz, 2H, NCH $_2$ ), 3.80 (s, 3H, OCH $_3$ ), 2.33 (s, 3H, ArCH $_3$ );  $^{13}\text{C}$  NMR (100 MHz, DMSO- $d_6$ )  $\delta$ : 167.9 (C=O), 149.7, 145.8, 140.4, 134.9, 134.6, 134.3, 131.2, 130.5, 130.3 (2C), 128.3, 126.4 (2C), 124.3, 120.4, 115.5, 115.1, 111.7, 109.9, 109.5, 51.6 (OMe), 40.5 (NCH $_2$ ), 21.0 (ArMe; HPLC: 98.5%, Column: Eclipse plus C-18 250\*4.6 mm 5 $\mu$ m, mobile phase A: 5 mM Ammonium acetate in water, mobile phase B: ACN, (gradient) T/B% : 0/30, 20/90, 30/90, 31/30, 35/30; flow rate: 1 mL/min, diluent: ACN:H $_2$ O (80:20), UV: 215.0 nm, retention time 23.7 min; MS (ES mass):  $m/z$  468.9 (M $^+$ , 100%).

### Preparation of compound 3d in gram scale

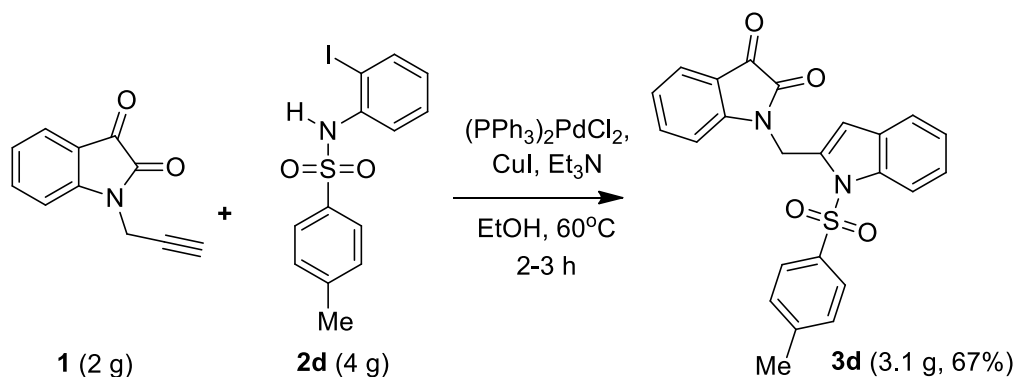

A mixture of 1-(prop-2-yn-1-yl)indoline-2,3-dione **1** (2.0 g, 10.8 mmol), *N*-(2-iodophenyl)-4-methylbenzenesulfonamide **2d** (4.0 g, 10.8 mmol), (PPh $_3$ ) $_2$ PdCl $_2$  (379.0 mg, 0.5 mmol), CuI (102.7 mg, 0.5 mmol) and triethylamine (3.0 mL, 21.6 mmol) in ethanol (30 mL) was stirred at

60°C for 2 h. After completion of the reaction (indicated by TLC) the reaction mixture is diluted with EtOAc (150 mL) and filtered through celite bed. The organic layer was collected, combined, washed with water (3 × 100 mL), dried over anhydrous Na<sub>2</sub>SO<sub>4</sub>, filtered and concentrated under low vacuum. The crude residue was purified by column chromatography on silica gel using 10% EtOAc in hexane to afford 1-{(1-tosyl-1*H*-indol-2-yl)methyl}indoline-2,3-dione (**3d**, 67% yield).

### General procedure for the preparation of compound 5

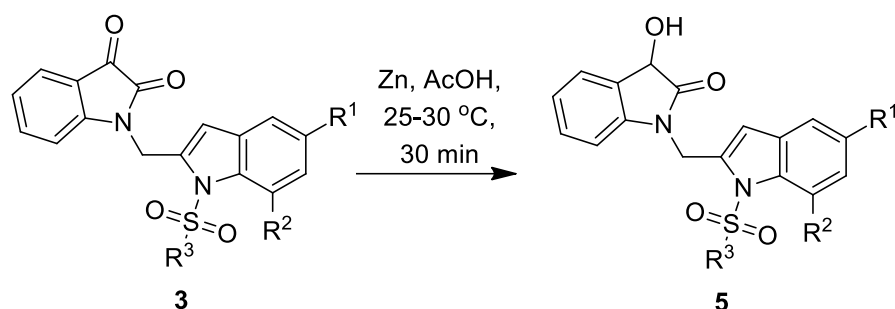

Zinc powder (100 mesh) (5 mmol) was added to a solution of compound **3** (1.0 mmol) in acetic acid (10 mL) under a nitrogen atmosphere. The mixture was stirred at room temperature (25-30 °C) for 30 min. After completion (confirmed by TLC), the mixture was filtered by Whatman filter paper to remove Zn. The filtrate was added to crush ice and stirred with glass rod till solid persists. Filter by Whatman filter paper and the solid was purified by column chromatography using 10% EtOAc in hexane as eluent to afford the title compound.

### 3-Hydroxy-1-{(1-tosyl-1*H*-indol-2-yl)methyl}indolin-2-one (**5a**)



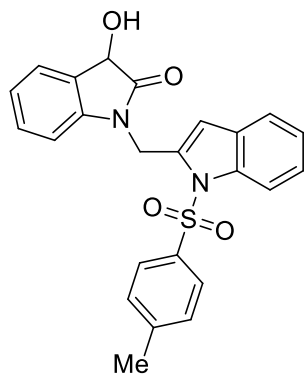

White solid (90% yield); mp: 195-197 °C;  $R_f$  = 0.21 (30% EtOAc/*n*-hexane);  $^1\text{H}$  NMR (400 MHz, DMSO- $d_6$ )  $\delta$ : 8.04 (d,  $J$  = 8.4 Hz, 1H, ArH), 7.90 (d,  $J$  = 8.4 Hz, 2H, ArH), 7.47-7.38 (m, 4H, ArH), 7.35-7.28 (m, 1H, ArH), 7.21 (q,  $J$  = 6.8 Hz, 2H, ArH), 7.07 (t,  $J$  = 7.2 Hz, 1H, ArH), 6.67 (d,  $J$  = 8.0 Hz, 1H, ArH), 6.39 (2s, 2H, indole (C-3) H, OH (D<sub>2</sub>O exchangeable)), 5.25 (m, 2H, NCH<sub>2</sub>), 5.12 (d,  $J$  = 7.6 Hz, 1H, CH-OH), 2.35 (s, 3H, ArCH<sub>3</sub>);  $^{13}\text{C}$  NMR (100 MHz, DMSO- $d_6$ )  $\delta$ : 176.2 (C=O), 145.8, 142.3, 136.4, 135.2, 134.3, 130.4 (2C), 129.1, 128.9, 128.7, 126.5 (2C), 124.8, 124.7, 124.0, 122.6, 120.8, 114.0, 108.9, 108.8, 68.8 (CH-OH), 38.2 (NCH<sub>2</sub>), 21.0 (ArMe); HPLC: 97.9%, Column: Eclipse XDB C-18 150\*4.6 mm 5 $\mu$ m, mobile phase A: 0.05% TFA in water, mobile phase B: 0.05% TFA in ACN, (gradient) T/B% : 0/30, 20/90, 30/90, 31/30, 35/30; flow rate: 1 mL/min, diluent: ACN:water (80:20), UV: 250.0 nm, retention time 14.7 min; MS (ES mass):  $m/z$  433.1 (M+1, 20%), 284.0 (M-148, 100%).

### 3-Hydroxy-1-[[1-(phenylsulfonyl)-1H-indol-2-yl]methyl]indolin-2-one (5b)

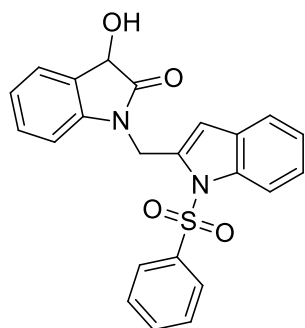

White solid (89% yield); mp: 187-189 °C;  $R_f$  = 0.21 (30% EtOAc/*n*-hexane);  $^1\text{H}$  NMR (400 MHz, DMSO- $d_6$ )  $\delta$ : 8.09-7.96 (m, 3H, ArH), 7.75 (t,  $J$  = 7.6 Hz, 1H, ArH), 7.64 (t,  $J$  = 8.0 Hz, 2H, ArH), 7.46-7.38 (m, 2H, ArH), 7.36-7.29 (m, 1H, ArH), 7.21 (t,  $J$  = 7.6 Hz, 2H, ArH), 7.07

(t,  $J = 7.6$  Hz, 1H, ArH), 6.67 (d,  $J = 8.0$  Hz, 1H, ArH), 6.39 (2s, 2H, indole (C-3) H, OH (D<sub>2</sub>O exchangeable)), 5.34-5.19 (m, 2H, NCH<sub>2</sub>), 5.12 (d,  $J = 8.0$  Hz, 1H, CH-OH); <sup>13</sup>C NMR (100 MHz, DMSO-*d*<sub>6</sub>)  $\delta$ : 176.2 (C=O), 142.3, 137.2, 136.4, 135.2, 134.9, 130.0 (2C), 129.1, 128.9, 128.7, 126.4 (2C), 124.8, 124.7, 124.1, 122.6, 120.9, 114.0, 109.0, 108.8, 68.8 (CH-OH), 38.2 (NCH<sub>2</sub>); HPLC: 99.3%, Column: Cosmiscil C-18 150\*4.6 mm 5 $\mu$ m, mobile phase A: 5 mM Ammonium acetate in water, mobile phase B: ACN, (gradient) T/B% : 0/5, 20/90, 25/90, 26/5, 30/5; flow rate: 1 mL/min, diluent: ACN:water (80:20), UV: 210.0 nm, retention time 15.6 min; MS (ES mass):  $m/z$  419.1 (M+1, 20%), 270.0 (M-148, 100%).

### 3-Hydroxy-1-[[1-(methylsulfonyl)-1H-indol-2-yl]methyl]indolin-2-one (5c)

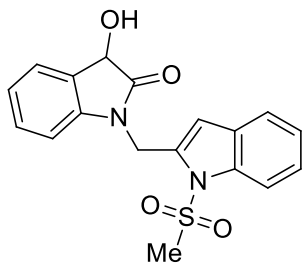

White solid (90% yield); mp: 155-157 °C;  $R_f = 0.18$  (30% EtOAc/*n*-hexane); <sup>1</sup>H NMR (400 MHz, DMSO-*d*<sub>6</sub>)  $\delta$ : 7.90 (d,  $J = 8.4$  Hz, 1H, ArH), 7.50 (d,  $J = 7.6$  Hz, 1H, ArH), 7.43 (d,  $J = 7.2$  Hz, 1H, ArH), 7.37-7.30 (m, 1H, ArH), 7.29-7.21 (m, 2H, ArH), 7.08 (t,  $J = 7.6$  Hz, 1H, ArH), 6.99 (d,  $J = 7.6$  Hz, 1H, ArH), 6.38 (2s, 2H, indole (C-3) H, OH (D<sub>2</sub>O exchangeable)), 5.26-5.06 (m, 3H, NCH<sub>2</sub>, CH-OH), 3.57 (s, 3H, SCH<sub>3</sub>); <sup>13</sup>C NMR (100 MHz, DMSO-*d*<sub>6</sub>)  $\delta$ : 176.2 (C=O), 142.4, 136.3, 135.3, 129.1, 128.7, 128.5, 124.7, 124.3, 123.5, 122.6, 120.7, 113.4, 109.3, 107.0, 68.9 (CH-OH), 41.1 (SMe), 37.8 (NCH<sub>2</sub>); HPLC: 99.4%, Column: Eclipse XDB C-18 150\*4.6 mm 5 $\mu$ m, mobile phase A: 0.05% TFA in water, mobile phase B: 0.05% TFA in ACN, (gradient) T/B% : 0/5, 20/90, 25/90, 26/5, 30/5; flow rate: 1 mL/min, diluent: ACN:water (80:20), UV: 210.0 nm, retention time 14.3 min; MS (ES mass):  $m/z$  357.0 (M+1, 20%), 208.0 (M-148, 100%).

### 1-[(5,7-dimethyl-1-tosyl-1H-indol-2-yl)methyl]-3-hydroxyindolin-2-one (5d)

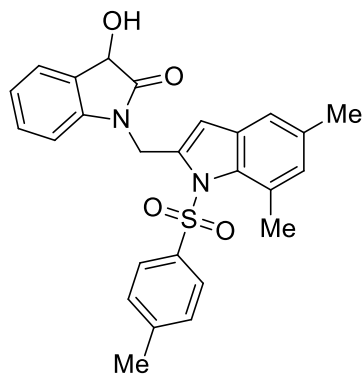

White solid (87% yield); mp: >200 °C;  $R_f$  = 0.3 (30% EtOAc/*n*-hexane);  $^1\text{H}$  NMR (400 MHz, DMSO- $d_6$ )  $\delta$ : 7.48 (d,  $J$  = 8.0 Hz, 2H, ArH), 7.39 (d,  $J$  = 7.2 Hz, 1H, ArH), 7.30 (d,  $J$  = 8.0 Hz, 2H, ArH), 7.20 (t,  $J$  = 8.0 Hz, 1H, ArH), 7.05 (t,  $J$  = 7.6 Hz, 1H, ArH), 6.92 (2s, 2H, ArH), 6.67 (d,  $J$  = 8.0 Hz, 1H, ArH), 6.34 (2s, 2H, indole (C-3) H, OH (D<sub>2</sub>O exchangeable)), 5.23-5.02 (m, 3H, NCH<sub>2</sub>, CH-OH), 2.59 (s, 3H, ArCH<sub>3</sub>), 2.23 (s, 3H, ArCH<sub>3</sub>), 2.32 (s, 3H, ArCH<sub>3</sub>);  $^{13}\text{C}$  NMR (100 MHz, DMSO- $d_6$ )  $\delta$ : 176.2 (C=O), 145.0, 142.2, 138.5, 136.9, 134.5, 133.0, 132.8, 129.9, 129.7 (2C), 129.1, 128.7, 127.3, 126.3 (2C), 124.7, 122.5, 118.8, 114.4, 108.9, 68.8 (CH-OH), 38.2 (NCH<sub>2</sub>), 21.6 (ArMe), 21.0 (ArMe), 20.5 (ArMe); HPLC: 90.5%, Column: X-Bridge phenyl C-18 150\*4.6 mm 5 $\mu\text{m}$ , mobile phase A: 0.05% TFA in water, mobile phase B: ACN:Water (90:10), (gradient) T/B% : 0/2, 5/2, 20/90, 25/90, 26/2, 30/2; flow rate: 1 mL/min, diluent: ACN:water (80:20), UV: 215.0 nm, retention time 16.3 min; MS (ES mass):  $m/z$  461.1 (M+1, 20%), 312.1 (M-148, 100%).

### General procedure for the preparation of compound 6:

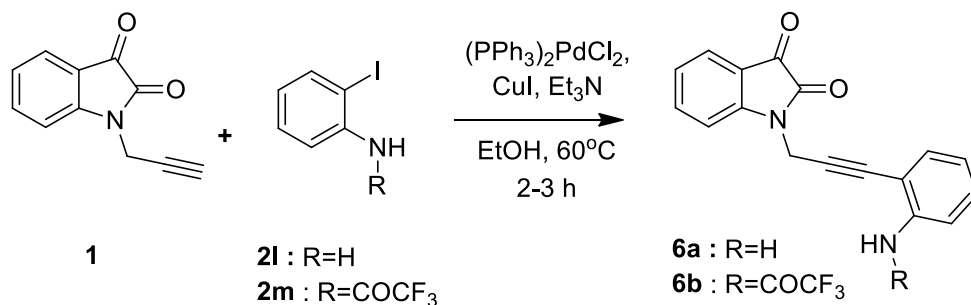

A mixture of compound **1** (1.0 mmol), Compound **2l** or **2m** (1.2 mmol), (PPh<sub>3</sub>)<sub>2</sub>PdCl<sub>2</sub> (5 mol%), CuI (5 mol%) and triethylamine (3.0 mmol) in ethanol (10 mL) was stirred at 60°C for 2-3 h. After completion of the reaction (indicated by TLC) the reaction mixture is diluted with EtOAc

(50 mL) and filtered through celite bed. The organic layer was collected, combined, washed with water ( $3 \times 30$  mL), dried over anhydrous  $\text{Na}_2\text{SO}_4$ , filtered and concentrated under low vacuum. The crude residue was purified by column chromatography on silica gel using 10% EtOAc in hexane to afford the desired product. Compounds (**6a** and **6b**) prepared, characterized by MS, NMR spectra and purity was determined by HPLC method.

### 1-{3-(2-Aminophenyl)prop-2-yn-1-yl}indoline-2,3-dione (**6a**)

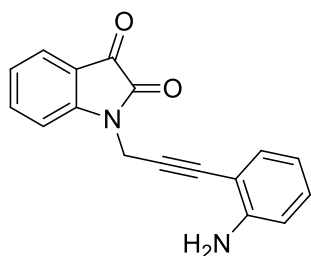

Orange solid (82% yield); mp: 84-86 °C;  $R_f=0.36$  (20% EtOAc/*n*-hexane);  $^1\text{H}$  NMR (400 MHz,  $\text{DMSO-}d_6$ )  $\delta$ : 7.74-7.66 (m, 1H, ArH), 7.58 (d,  $J = 7.2$  Hz, 1H, ArH), 7.38 (d,  $J = 8.0$  Hz, 1H, ArH), 7.16 (t,  $J = 7.6$  Hz, 1H, ArH), 7.08 (dd,  $J = 7.6, 1.2$  Hz, 1H, ArH), 7.05-6.99 (m, 1H, ArH), 6.64 (d,  $J = 8.0$  Hz, 1H, ArH), 6.44 (t,  $J = 7.6$  Hz, 1H, ArH), 5.41 (bs, 2H,  $\text{NH}_2$ ,  $\text{D}_2\text{O}$  exchangeable), 4.81 (s, 2H,  $\text{NCH}_2$ );  $^{13}\text{C}$  NMR (100 MHz,  $\text{DMSO-}d_6$ )  $\delta$ : 183.2 (C=O), 157.9 (C=O), 150.6, 150.1, 138.4, 132.1, 130.3, 124.9, 123.9, 118.2, 116.0, 114.2, 111.8, 105.1, 87.8 ( $-\text{C}\equiv$ ), 81.2 ( $-\text{C}\equiv$ ), 30.6 ( $\text{NCH}_2$ ); MS (ES mass):  $m/z$  277.1 ( $\text{M}+1$ , 30%), 249.1 ( $\text{M}-28$ , 100%).

### *N*-[2-{3-(2,3-dioxindolin-1-yl)prop-1-yn-1-yl}phenyl]-2,2,2-trifluoroacetamide (**6b**)

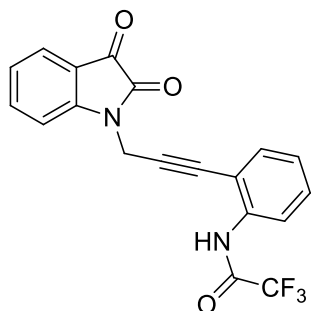

Yellow solid (92% yield); mp: 92-94 °C;  $R_f=0.55$  (20% EtOAc/*n*-hexane);  $^1\text{H}$  NMR (400 MHz,  $\text{DMSO-}d_6$ )  $\delta$ : 11.06 (bs, H, NH,  $\text{D}_2\text{O}$  exchangeable), 7.69 (dt,  $J = 8.0, 1.2$  Hz, 1H, ArH), 7.61 (d,  $J = 7.2$  Hz, 1H, ArH), 7.55 (dd,  $J = 7.6, 1.2$  Hz, 1H, ArH), 7.50-7.44 (m, 1H, ArH), 7.40 (d,  $J =$

7.0 Hz, 1H, ArH), 7.35 (dt,  $J = 7.6, 1.2$  Hz, 1H, ArH), 7.26 (d,  $J = 8.0$  Hz, 1H, ArH), 7.19 (t,  $J = 7.2$  Hz, 1H, ArH), 4.81 (s, 2H, NCH<sub>2</sub>); <sup>13</sup>C NMR (100 MHz, DMSO-*d*<sub>6</sub>)  $\delta$ : 182.7 (C=O), 157.2 (C=O), 155.2 (C-F  $J = 36.7$  Hz), 149.6, 138.2, 136.1, 132.7, 129.7, 127.6, 126.7, 124.5, 123.6, 119.0, 117.6, 117.2 (C-F  $J = 287.0$  Hz), 111.1, 88.2 (-C $\equiv$ ), 79.1 (-C $\equiv$ ), 29.7 (NCH<sub>2</sub>); HPLC: 99.2%, Column: X-Bridge ODS C-18 150\*4.6 mm 5 $\mu$ m, mobile phase A: 5 mM Ammonium acetate in water, mobile phase B: ACN, (gradient) T/B% : 0/30, 30/90, 40/90, 41/5, 45/5; flow rate: 1 mL/min, diluent: ACN:THF, UV: 240.0 nm, retention time 13.3 min; MS (ES mass):  $m/z$  372.9 (M<sup>+</sup>, 100%).

### Docking study

All ligand structures were built in MarvinSketch.<sup>1</sup> Protein (2FP2) as well as all ligands were prepared (means optimization, charge calculation, deletion of co-crystal ligand, and addition of hydrogen etc.) using AtuDock tool.<sup>2</sup> All ligands were docked at interface site of *Mtb*CM (which is homodimer) using reliable open-source tool AutoDock Vina.<sup>3</sup> The grid map was made up of 20X20X20 points using AutoGrid with 0.54, 3.92, and 42.25 as center\_X, center\_Y, and center\_Z respectively. To search all possible conformation of ligands thoroughly, exhaustiveness value of 20 were used, which made the process little more time consuming, but accurately identified the best pose of individual ligand.

To check the reproducibility of docking result, we have performed docking of each individual ligand at least ten times and maximum difference found  $\pm 0.2$ . The validation of docking protocol was done by re-docking the co-crystal ligand (TSA) and calculating RMSD difference between co-crystal one and docked one in PyMOL,<sup>4</sup> maximum RMSD was 1.713 (<2) that indicated accuracy of our docking protocol.

### Pharmacology

#### In vitro assay for CM inhibition

#### Enzyme and Reagents

*Mycobacterium tuberculosis* chorismate mutase (*Mtb*CM) gene was PCR amplified and cloned into expression vector pET22b. *Mtb*CM was purified from over expressed culture of BL21 (DE3) harboring pET22b/ *Mtb*CM by Ni-NTA affinity chromatography. The substrate chorismic acid was obtained from Sigma (SIGMA cat # 1701).

## The CM enzymatic assay

Activity of chorismate mutase enzyme was based on the direct observation of conversion of chorismate to prephenate spectrophotometrically at OD<sub>274</sub>. The reaction volume of the assay was maintained at 100 µl. The substrate chorismic acid (2 mM) was pre incubated at 37 °C for 5 min in the buffer containing 50 mM Tris-HCl (pH 7.5), 0.5 mM EDTA, 0.1 mg/ml bovine serum albumin, and 10 mM β-Mercaptoethanol. The reaction was started by adding 180 pmol of CM enzyme to the pre-warmed chorismic acid solution. Inhibitory screening of the test compounds against CM activity was measured at 30 µM (10 nM to 30 µM for concentration dependent study) concentration of the effectors. The reaction was allowed to proceed at 37 °C and was terminated after 5 min with 100 µl of 1 N HCl and absorbance was read at 274 nm. Alternatively, the reaction was allowed to proceed for further 10 min and was then terminated with 180 µM of 2.5N NaOH and absorbance was measured at 320 nm. A blank with no enzyme for every reaction was kept as a control to account for the non enzymatic conversion of chorismate to prephenate. The % of enzyme inhibition caused by the test compound was calculated by the following formula:

% inhibition = 100 – residual activity of CM

Residual activity of CM =  $[A_{274} \{S + (E' + C)\} - A_{274} (S + C)] / [A_{274} (S + E) - A_{274} (S)]$

S = absorbance of the substrate (chorismic acid) at 274 nm; E' = absorbance of the enzyme (CM) at 274 nm with compound; E = absorbance of the enzyme (CM) at 274 nm without compound; C = test compound; A<sub>274</sub> indicates absorbance at 274 nm (this is replaced by A<sub>320</sub> for absorbance at 320 nm).

## Computational ADME prediction

### Software and methods

The ADME predictions were performed by using the SwissADME web-tool [15], where the molecules were drawn using Marvin JS (version 16.4.18, 2016) and converted into SMILES by JChem Web Services (version 14.9.29, 2013). Then the 3D conformations were generated through the StringMolExport function. All descriptors and important molecular parameters of physicochemical properties were computed by OpenBable API (version 2.3.0, 2012). The

predictive models were mostly generated by Quantitative Structure-Property Relationship (QSPR) methods along with some other robust models. As the SwissADME is a web-based tool, all these process are done in an automated manner.

## References

1. Huey, R., and G. M. Morris. "AutoDock tools." *La Jolla, CA, USA: The Scripps Research Institute* (2003).
2. Trott, Oleg, and Arthur J. Olson. "AutoDock Vina: improving the speed and accuracy of docking with a new scoring function, efficient optimization, and multithreading." *Journal of computational chemistry* 31, no. 2 (2010): 455-461.
3. DeLano, W.L., 2002. Pymol: An open-source molecular graphics tool. *CCP4 Newsletter On Protein Crystallography*, 40(1), pp.82-92.

# Copies of spectra

$^1\text{H}$  NMR (Varian, 400 MHz) spectrum of compound **1** in  $\text{DMSO-}d_6$

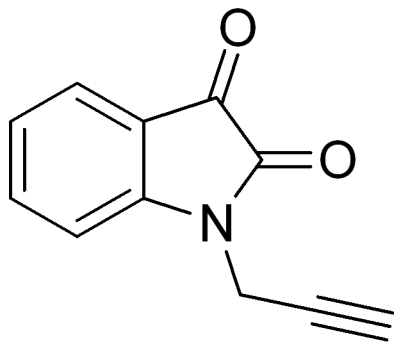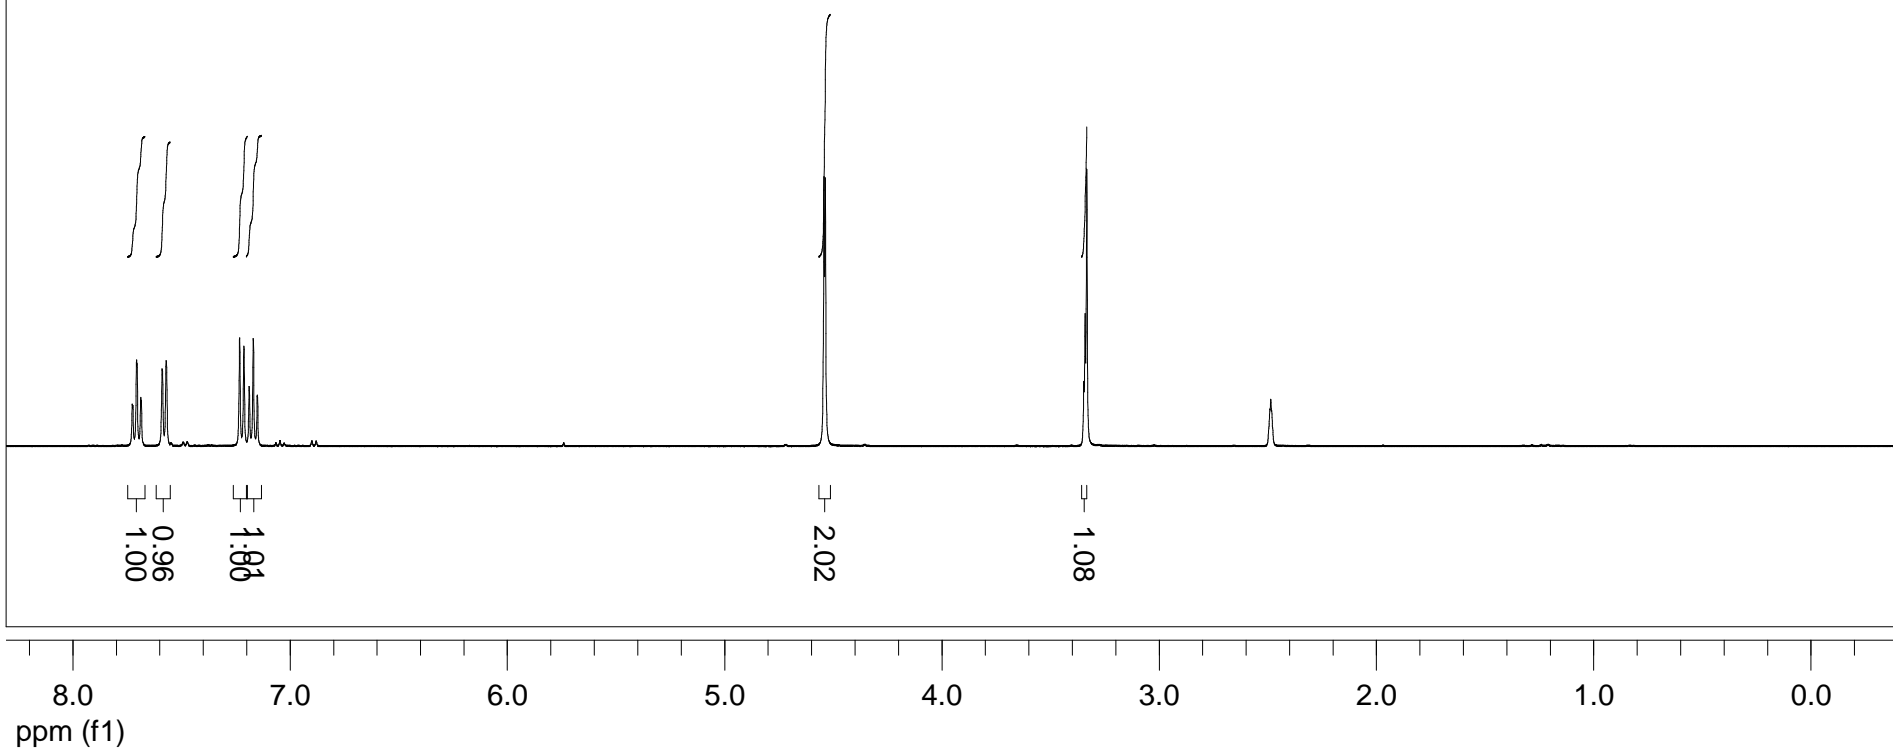



182.949

157.750

149.857

138.546

125.000

124.059

118.096

111.611

77.790

75.422

29.452

$^{13}\text{C}$  NMR spectrum (Varian, 100 MHz) of compound **1** in  $\text{DMSO-}d_6$

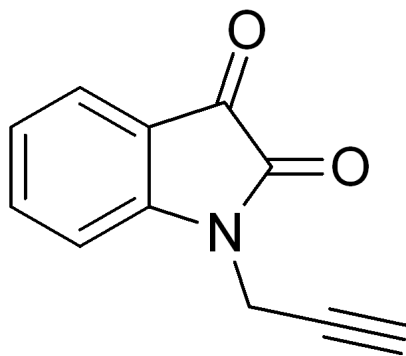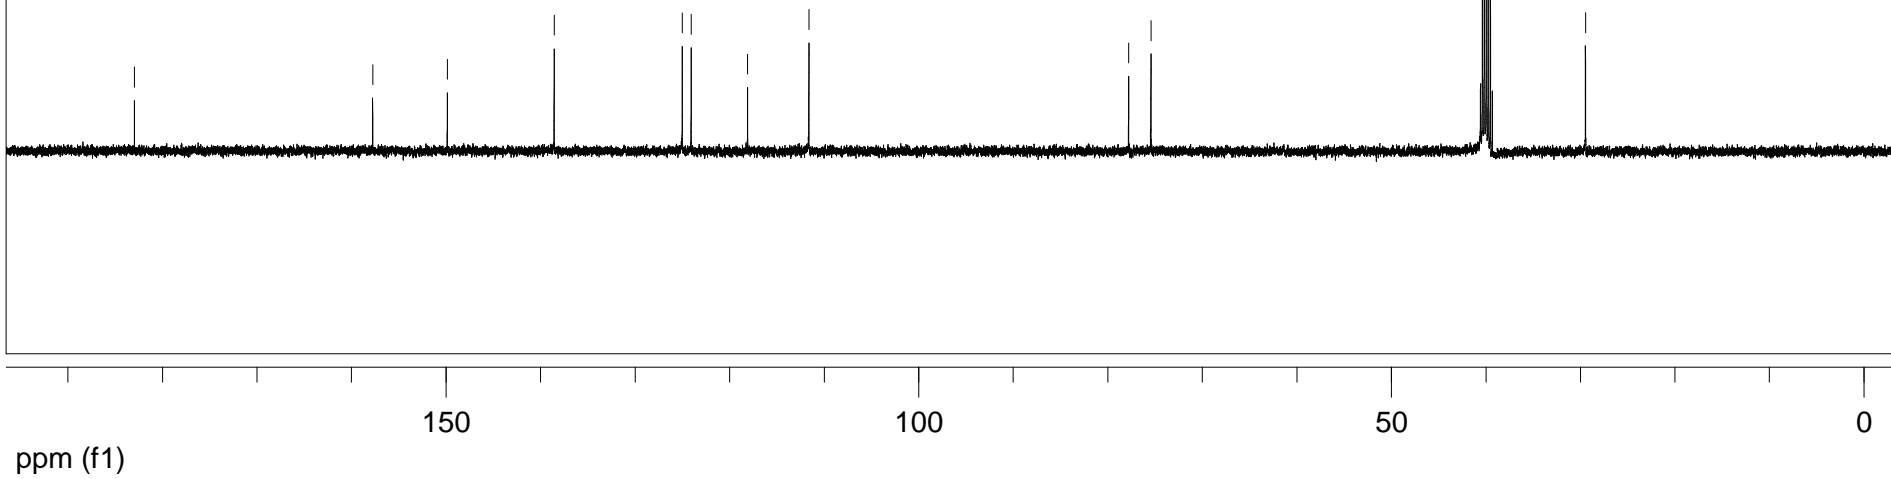

$^1\text{H}$  NMR (Varian, 400 MHz) spectrum of compound **3a** in  $\text{DMSO-}d_6$

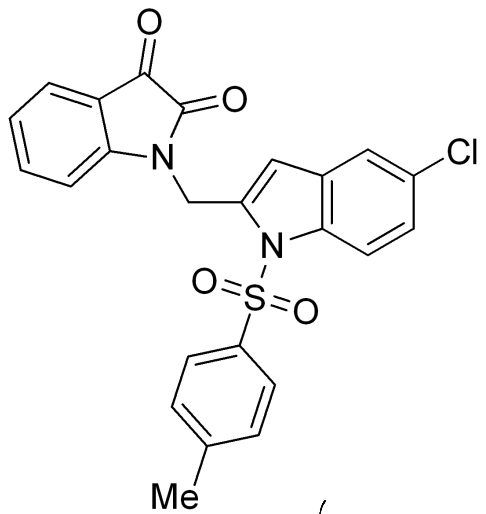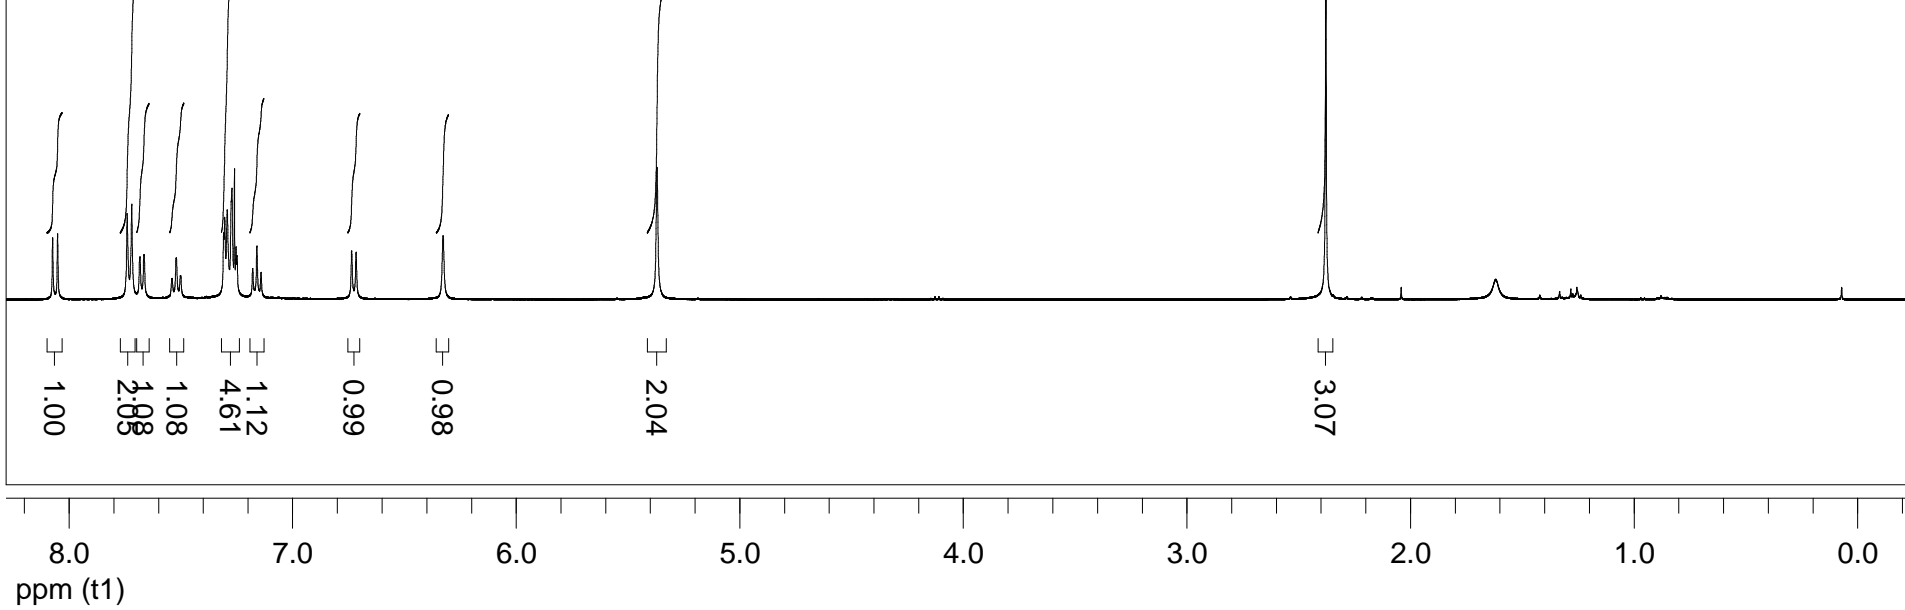

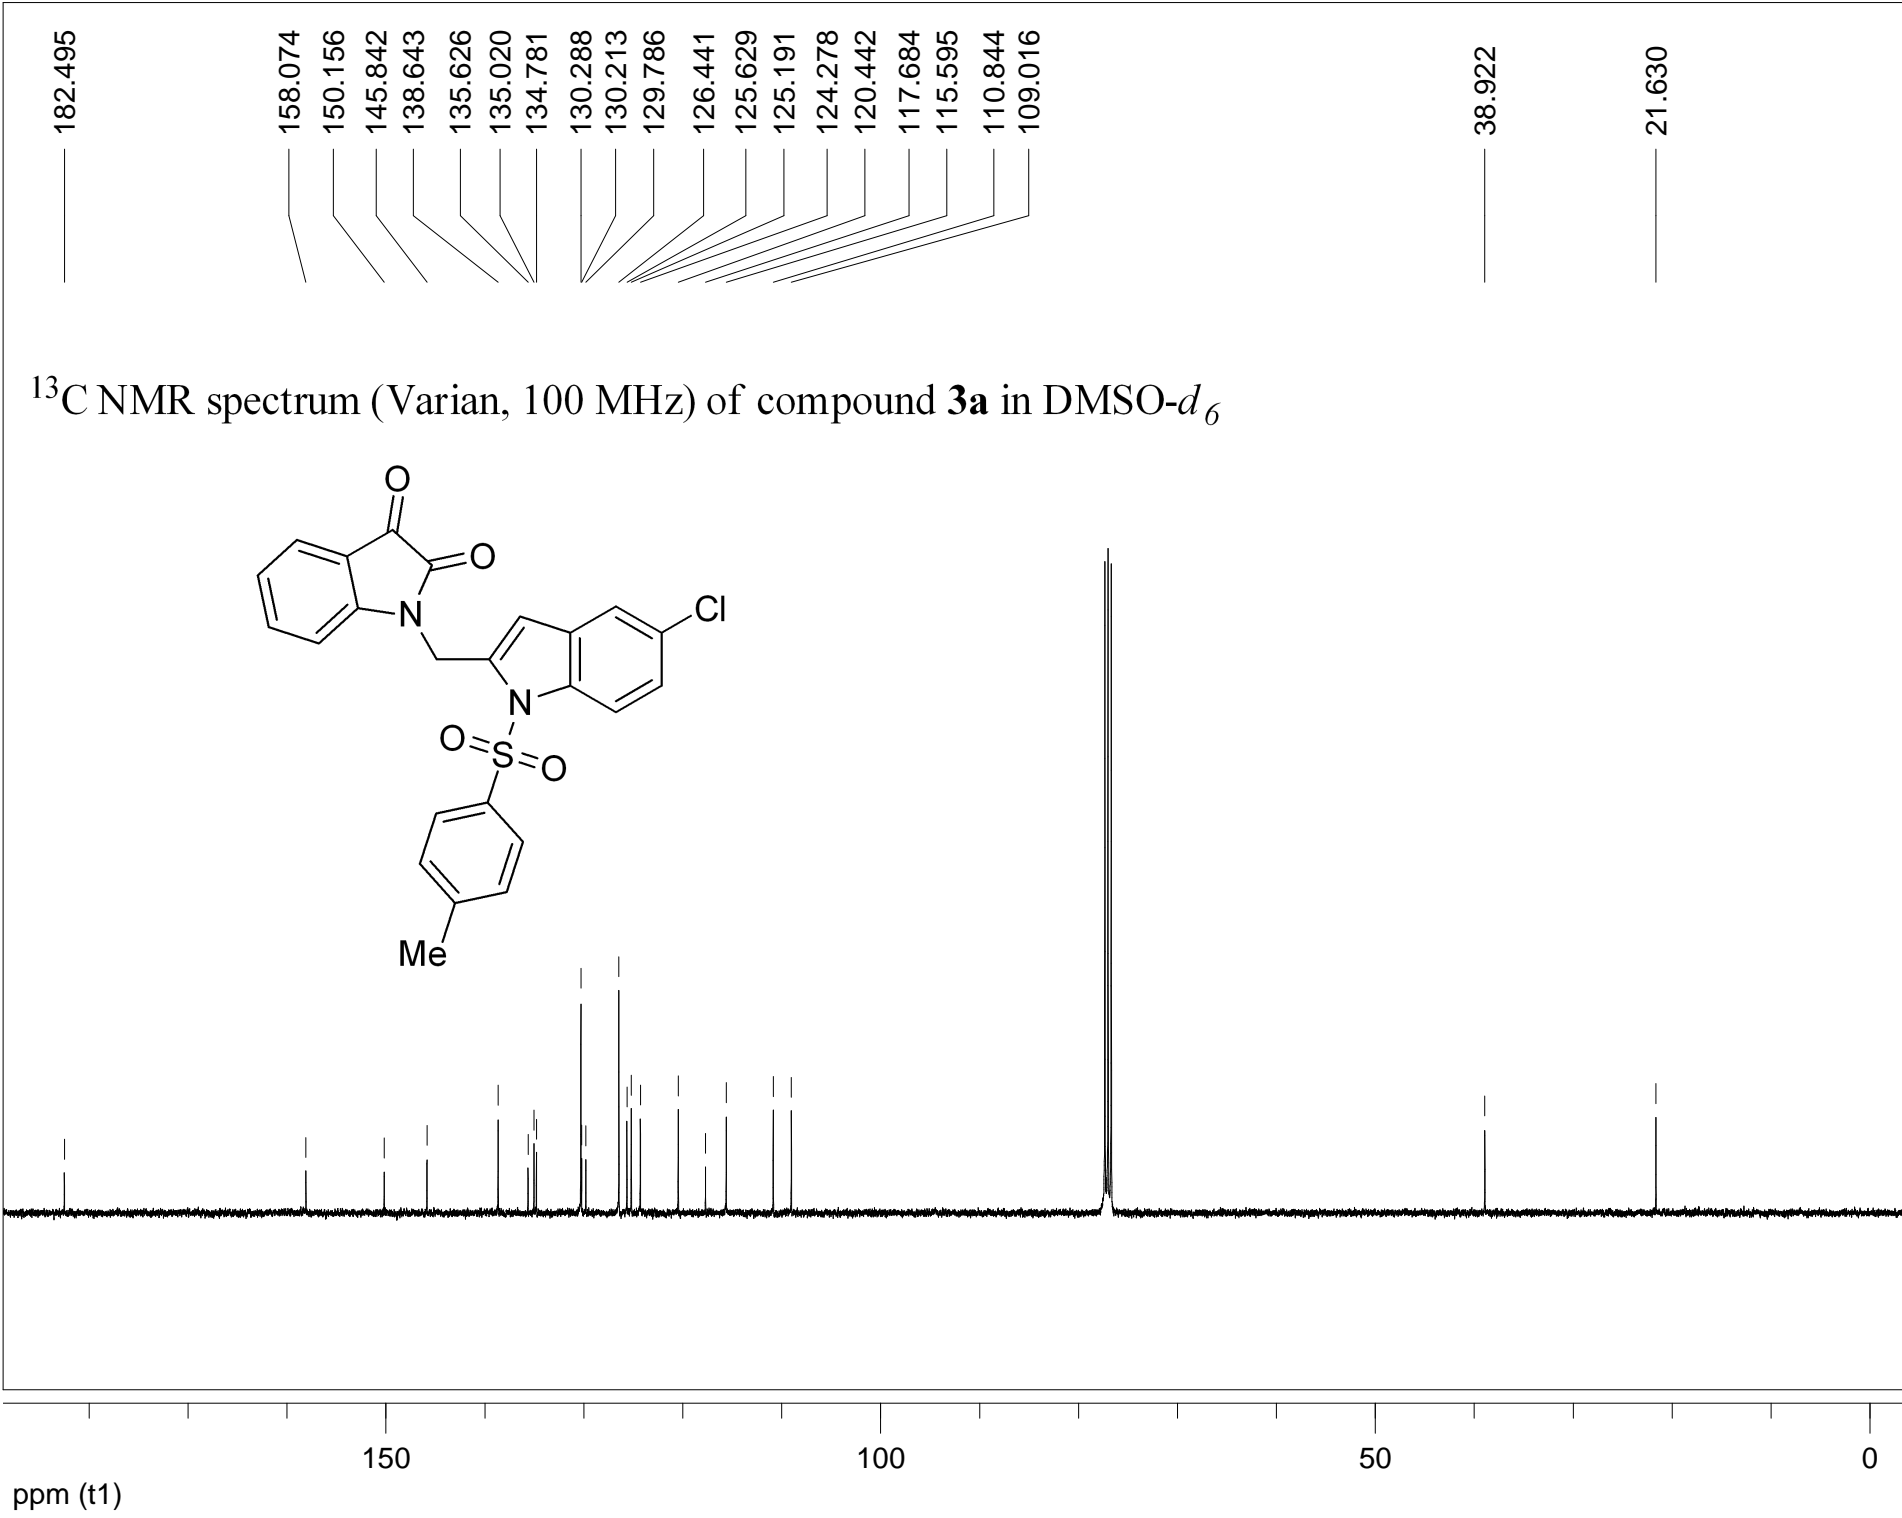

$^1\text{H}$  NMR (Varian, 400 MHz) spectrum of compound **3b** in  $\text{DMSO-}d_6$

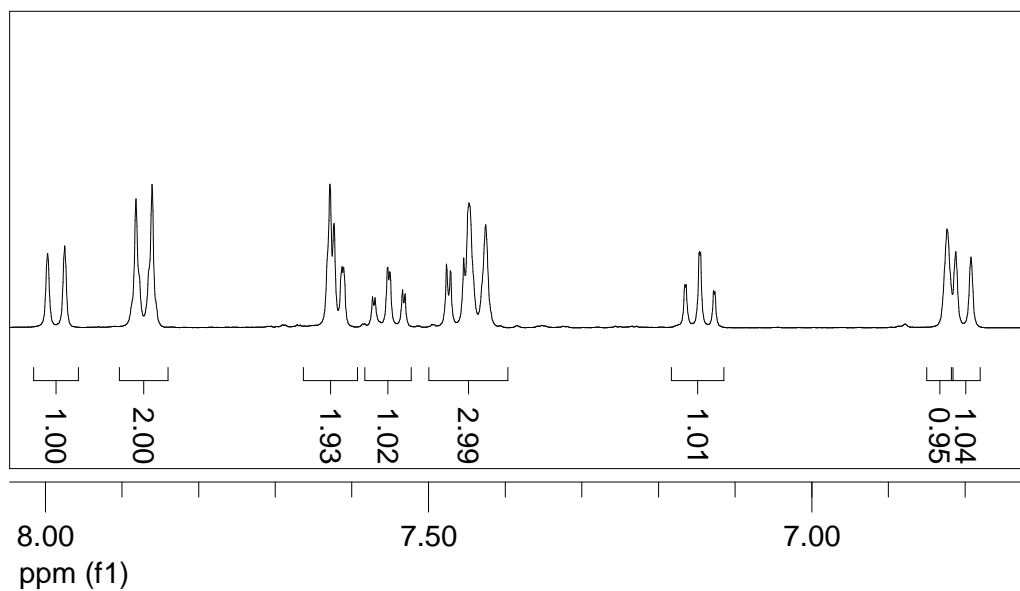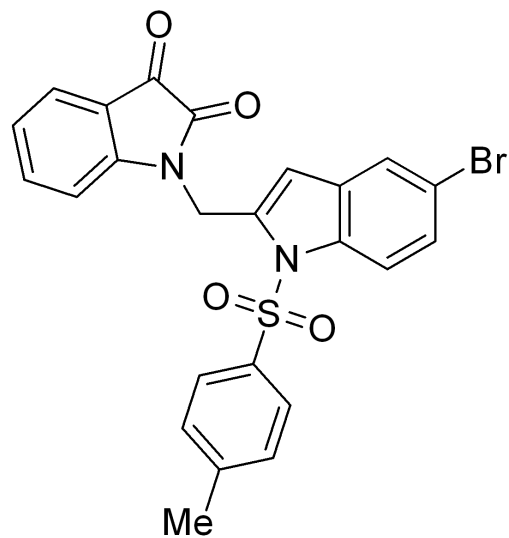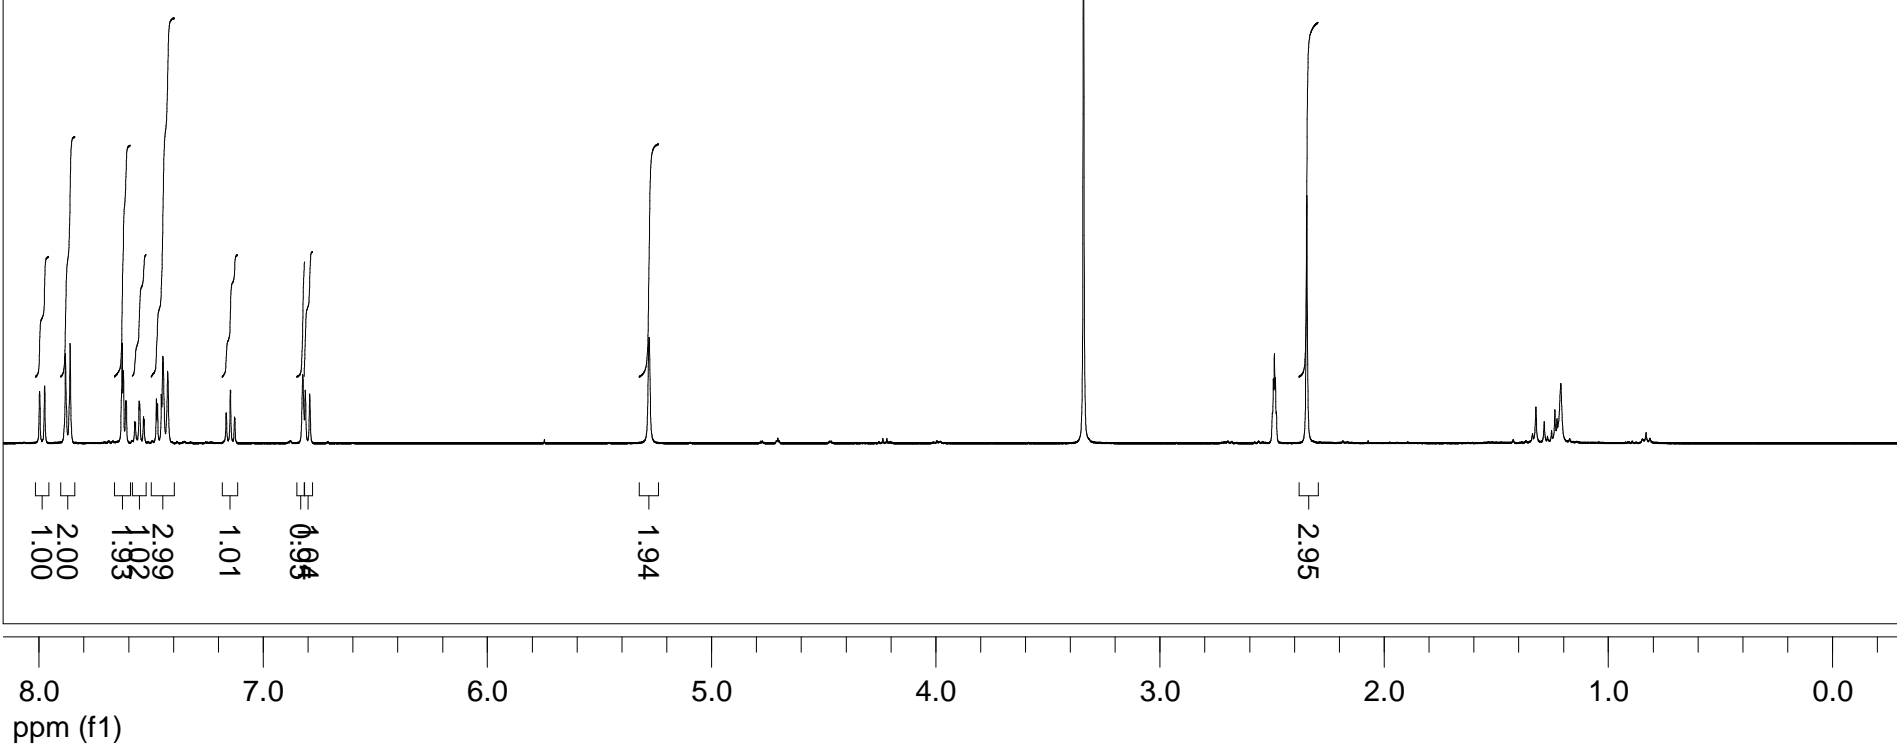

$^{13}\text{C}$  NMR spectrum (Varian, 100 MHz) of compound **3b** in  $\text{DMSO-}d_6$

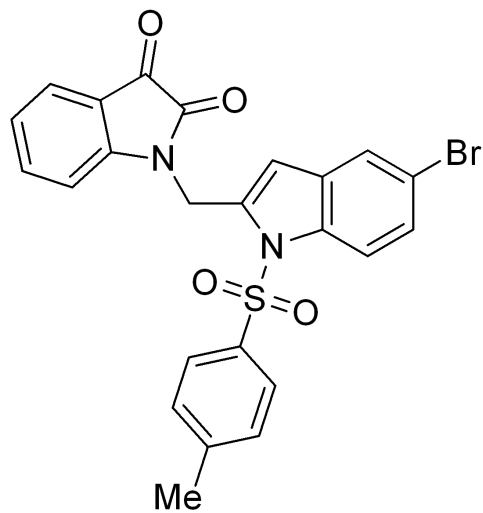

182.953  
158.847  
150.272  
146.615  
138.339  
136.413  
135.781  
134.399  
131.443  
130.993  
127.768  
126.894  
124.956  
123.936  
123.767  
118.532  
117.073  
116.355  
111.237  
109.331

39.167

21.525

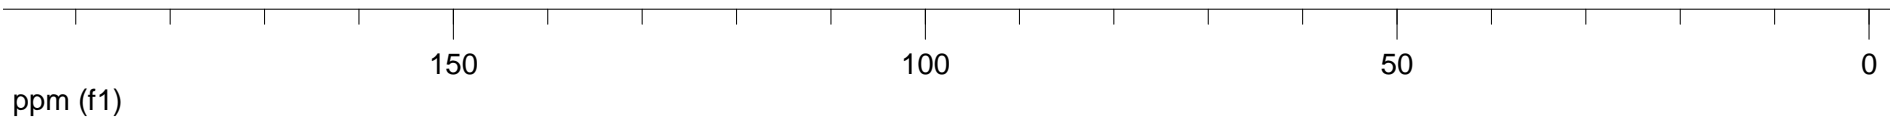

$^1\text{H}$  NMR (Varian, 400 MHz) spectrum of compound **3c** in  $\text{DMSO-}d_6$

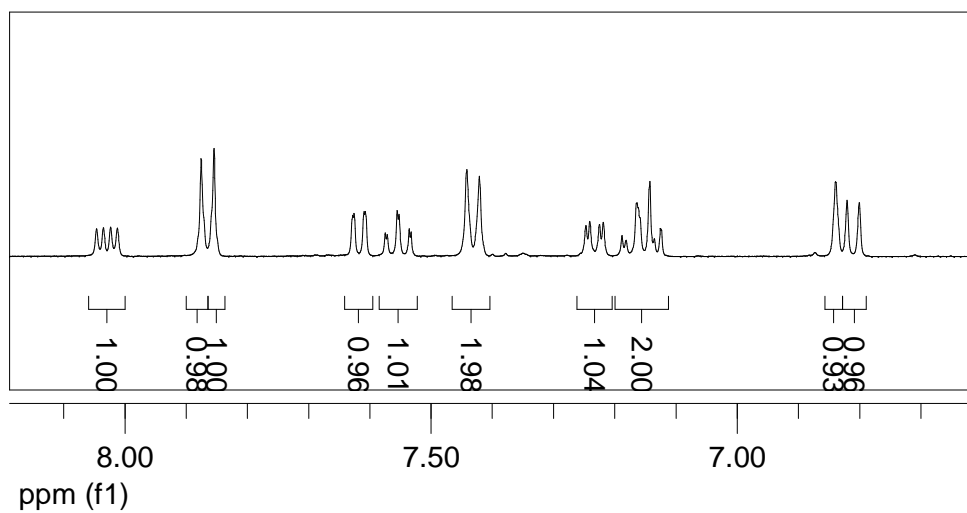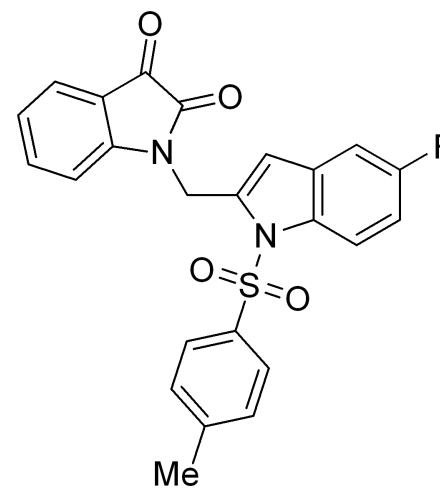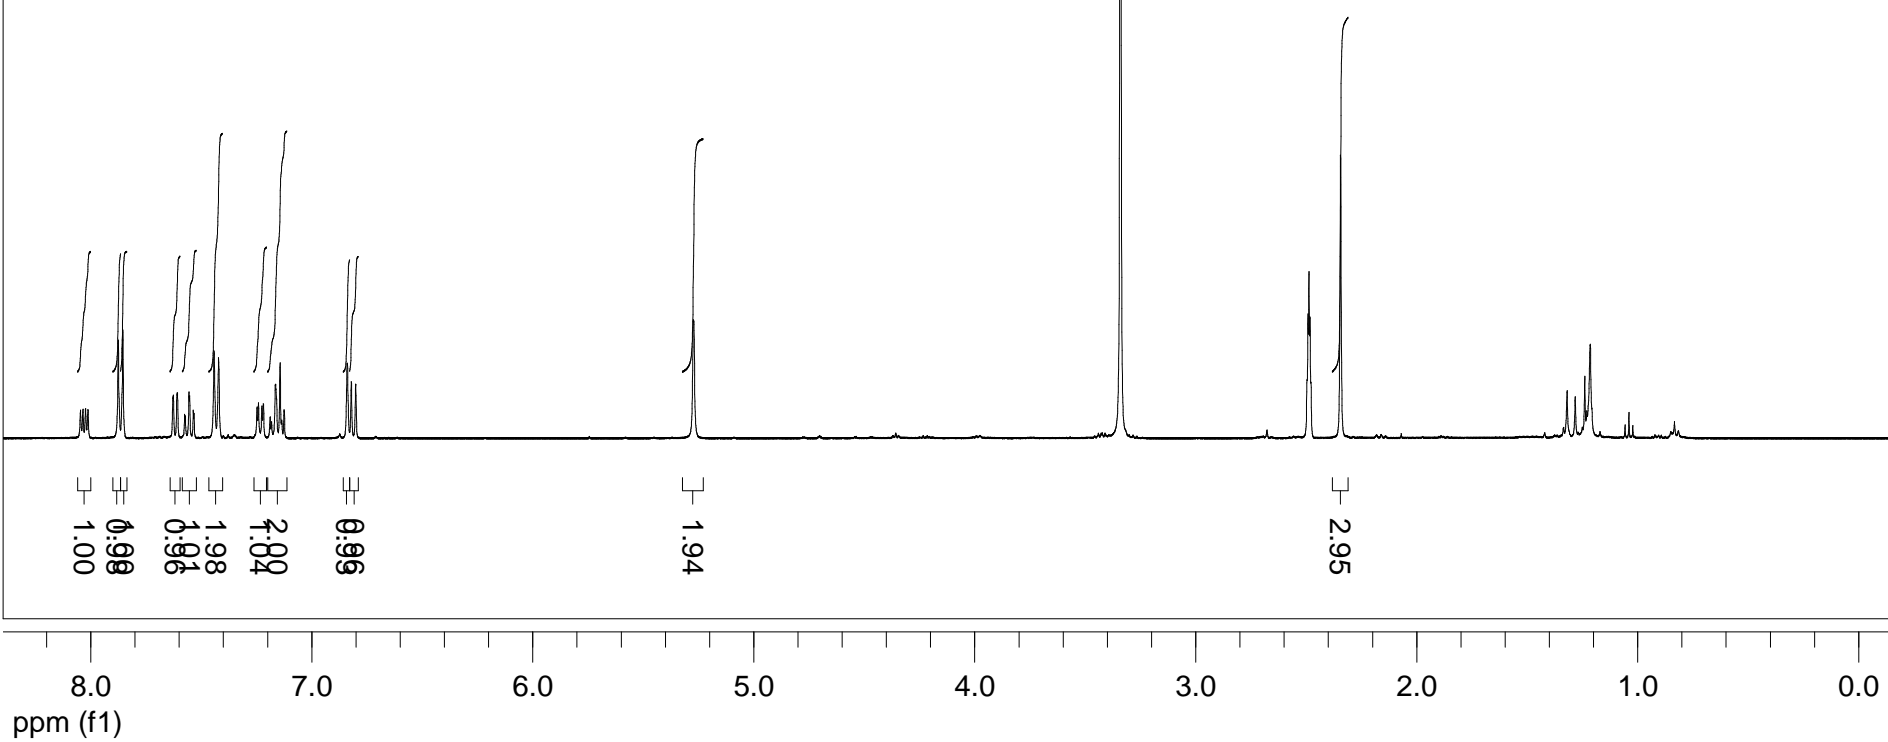

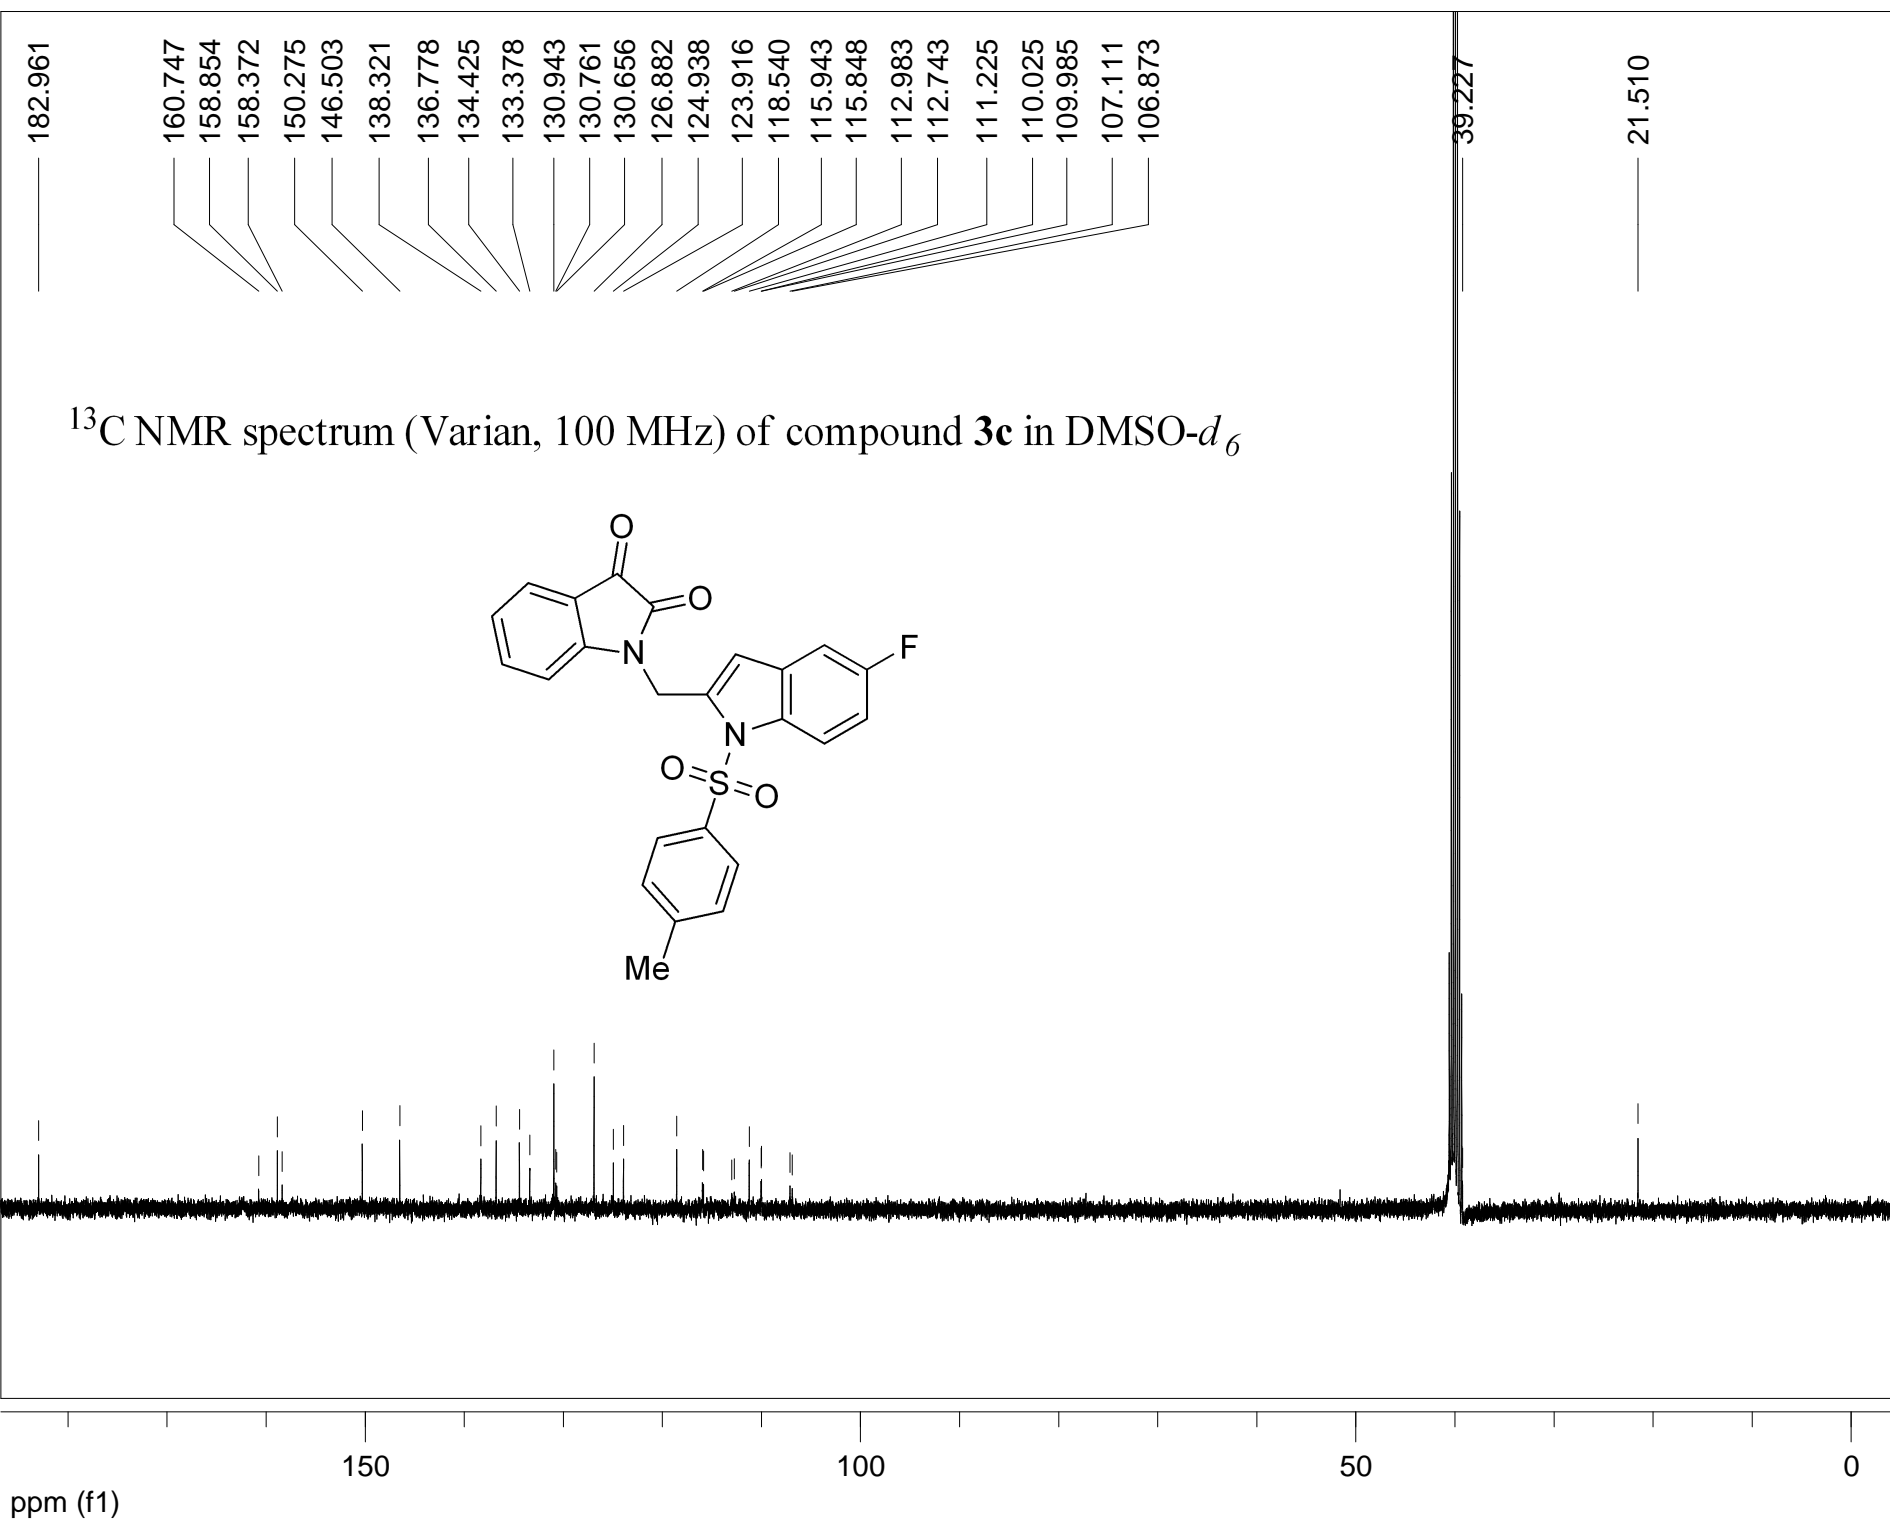

$^1\text{H}$  NMR (Varian, 400 MHz) spectrum of compound **3d** in  $\text{DMSO-}d_6$

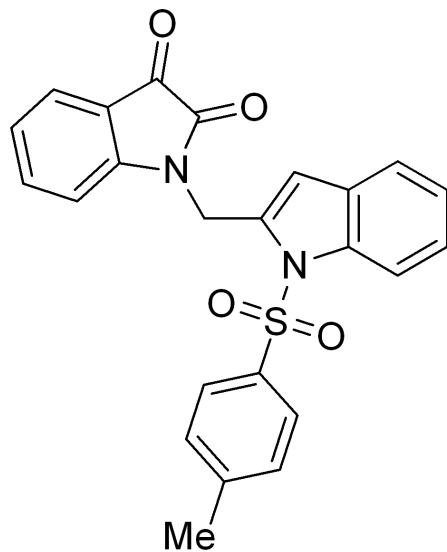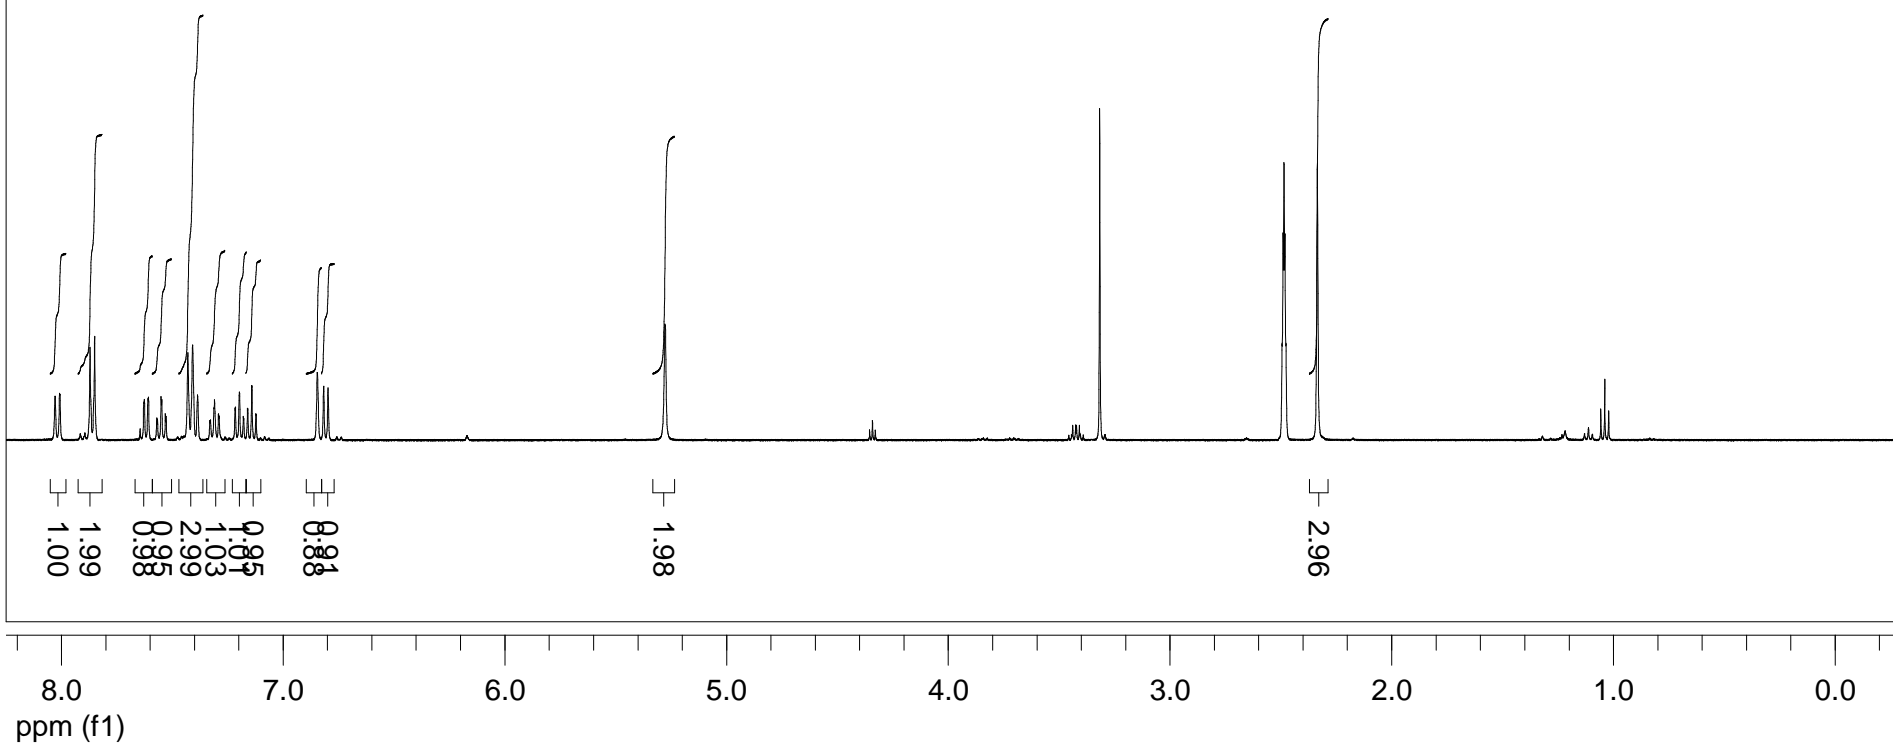



183.048  
158.837  
150.372  
146.298  
138.308  
136.932  
134.730  
134.671  
130.872  
129.499  
126.847  
125.171  
124.924  
124.426  
123.873  
121.373  
118.542  
114.449  
111.244  
110.166

$^{13}\text{C}$  NMR spectrum (Varian, 100 MHz) of compound **3d** in  $\text{DMSO-}d_6$

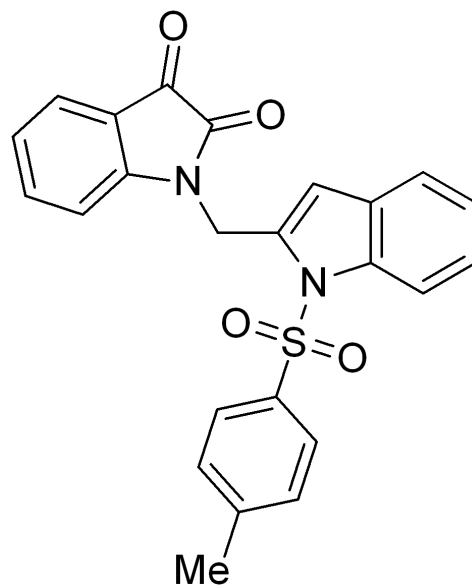

39.230

21.495

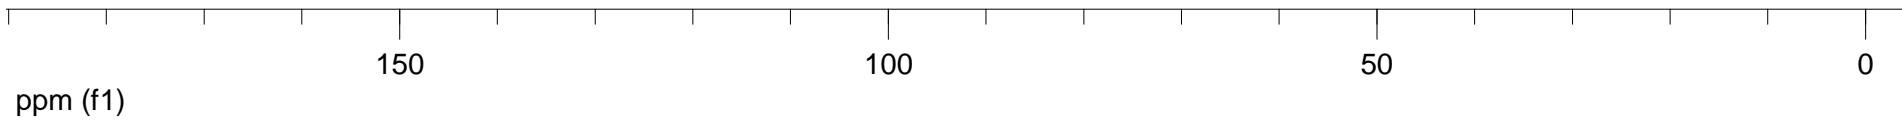

$^1\text{H}$  NMR (Varian, 400 MHz) spectrum of compound **3e** in  $\text{DMSO-}d_6$

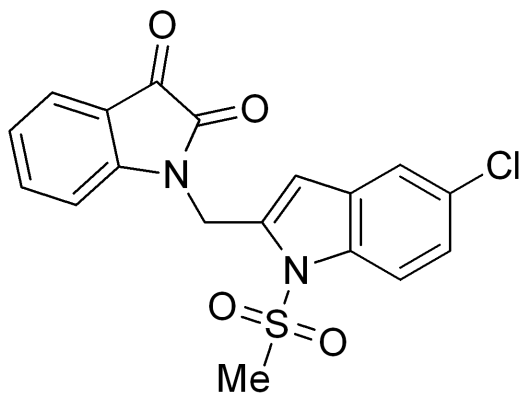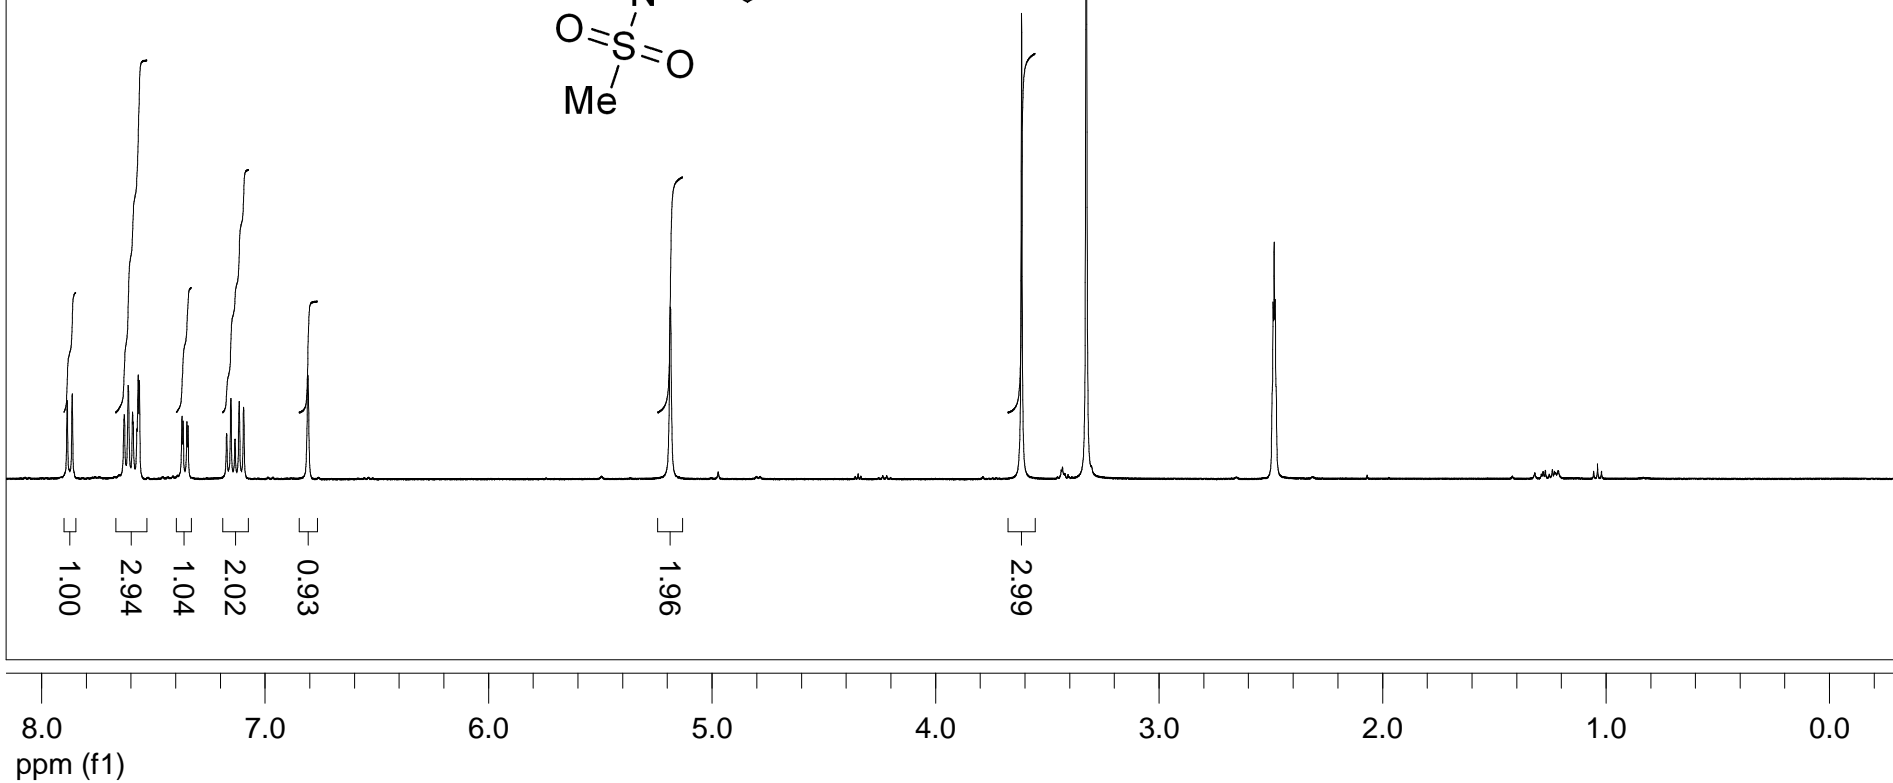

183.076

158.851

150.441

138.290

136.666

135.316

130.501

128.434

124.857

124.644

123.900

120.528

118.514

115.432

111.683

107.372

41.748

38.809

$^{13}\text{C}$  NMR spectrum (Varian, 100 MHz) of compound **3e** in  $\text{DMSO-}d_6$

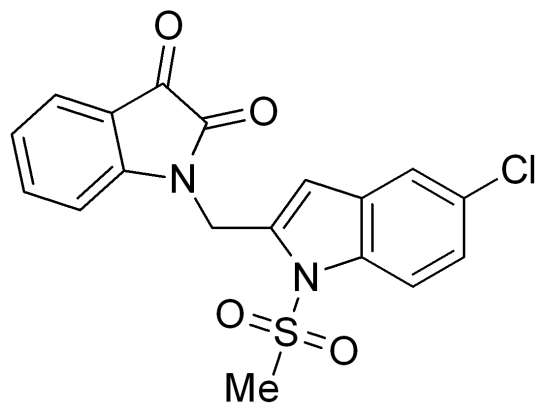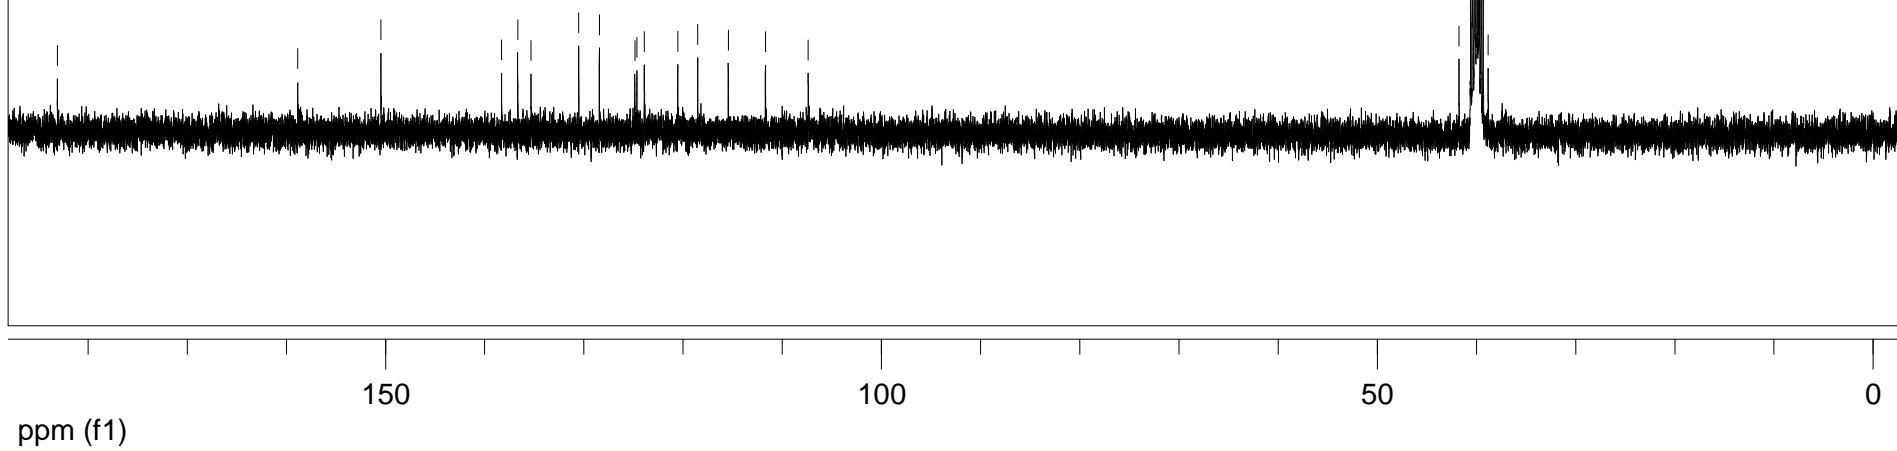

$^1\text{H}$  NMR (Varian, 400 MHz) spectrum of compound **3f** in  $\text{DMSO-}d_6$

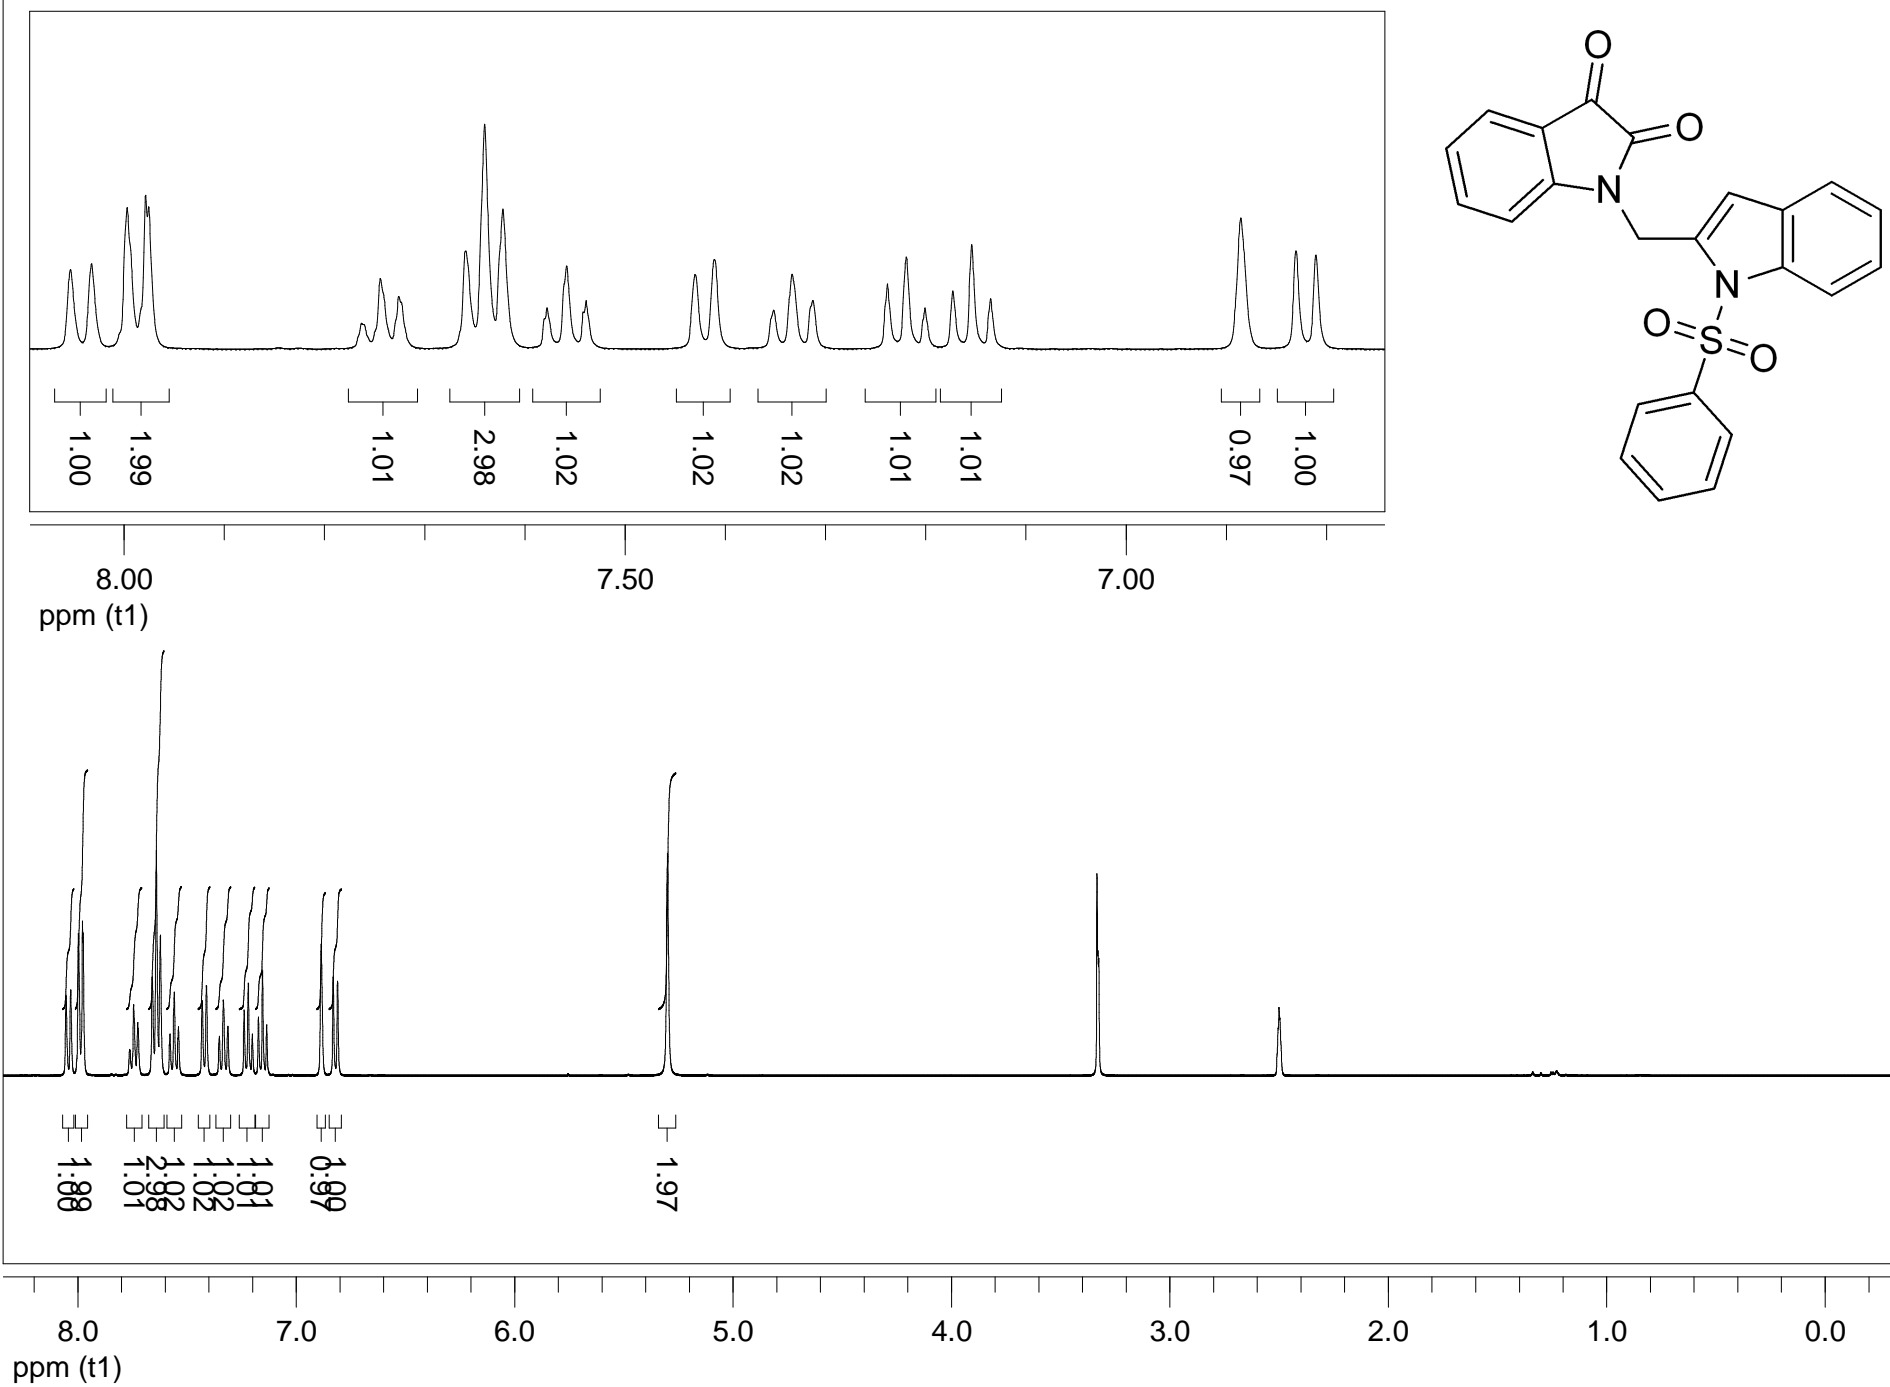

183.076  
158.879  
150.406  
138.363  
137.600  
137.000  
135.417  
134.786  
130.527  
129.524  
126.819  
125.287  
124.976  
124.550  
123.928  
121.463  
118.571  
114.455  
111.246  
110.336

$^{13}\text{C}$  NMR spectrum (Varian, 100 MHz) of compound **3f** in  $\text{DMSO-}d_6$

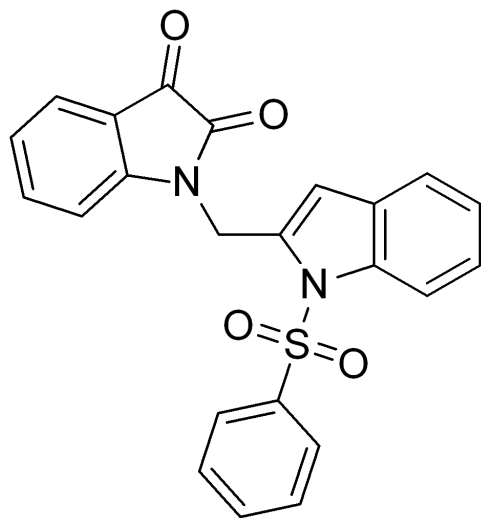

39.251

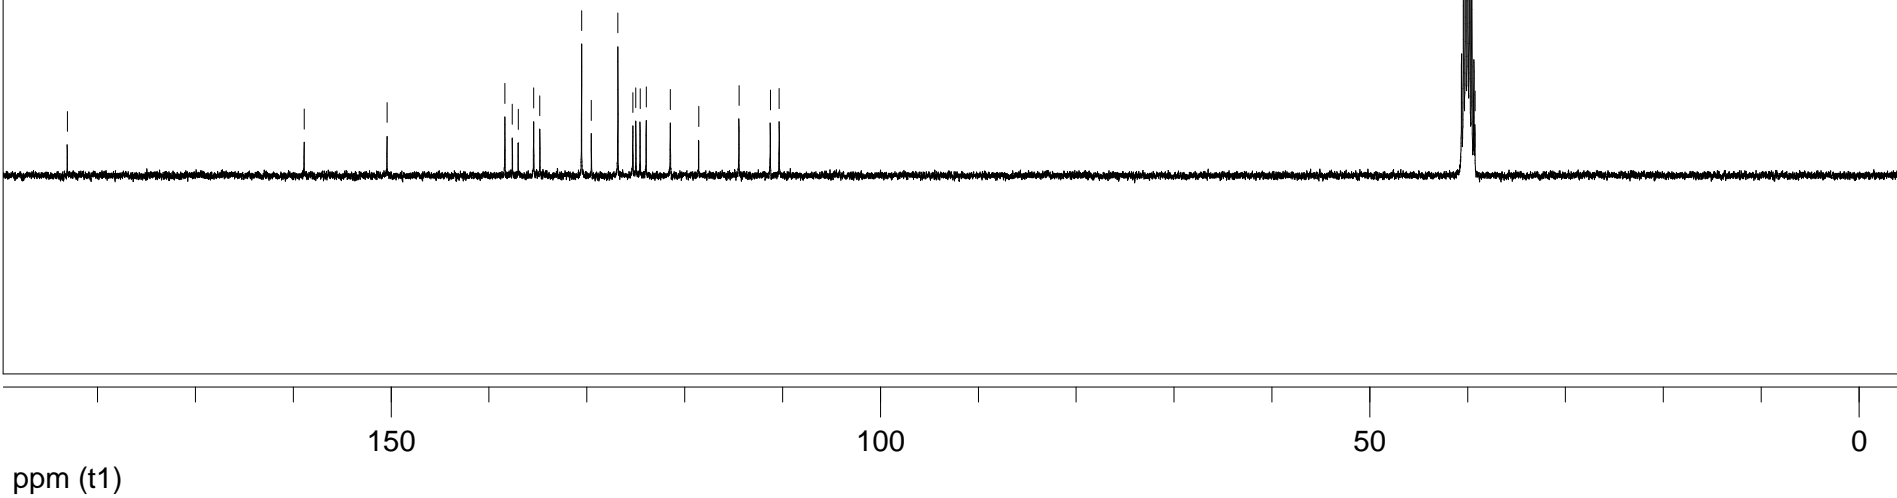

$^1\text{H}$  NMR (Varian, 400 MHz) spectrum of compound **3g** in  $\text{DMSO-}d_6$

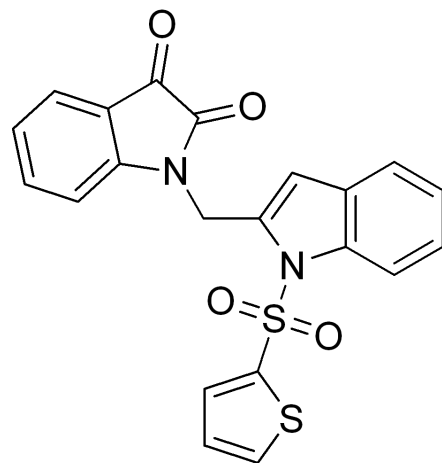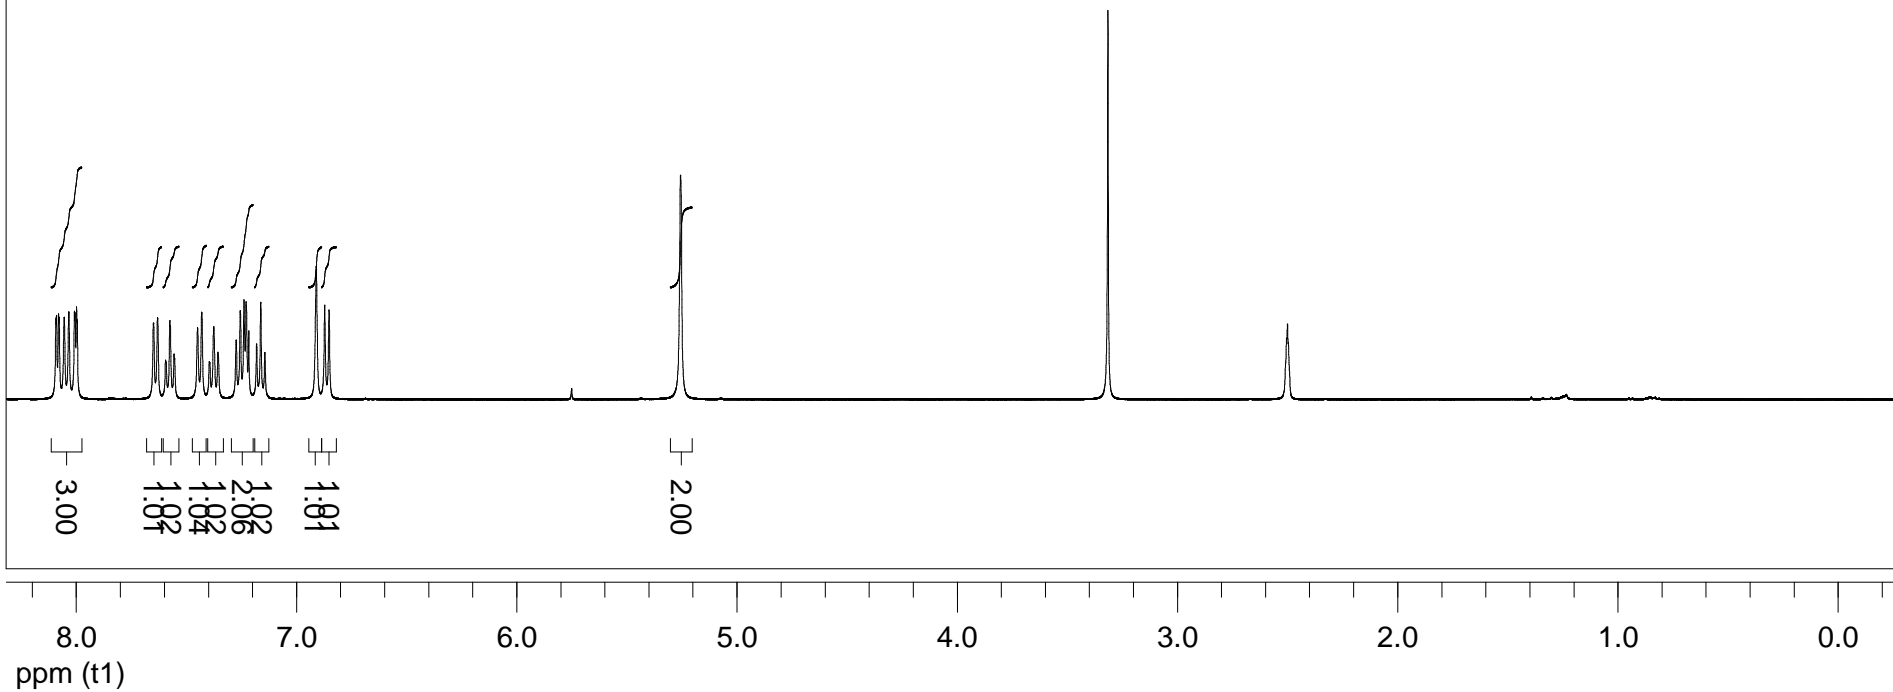

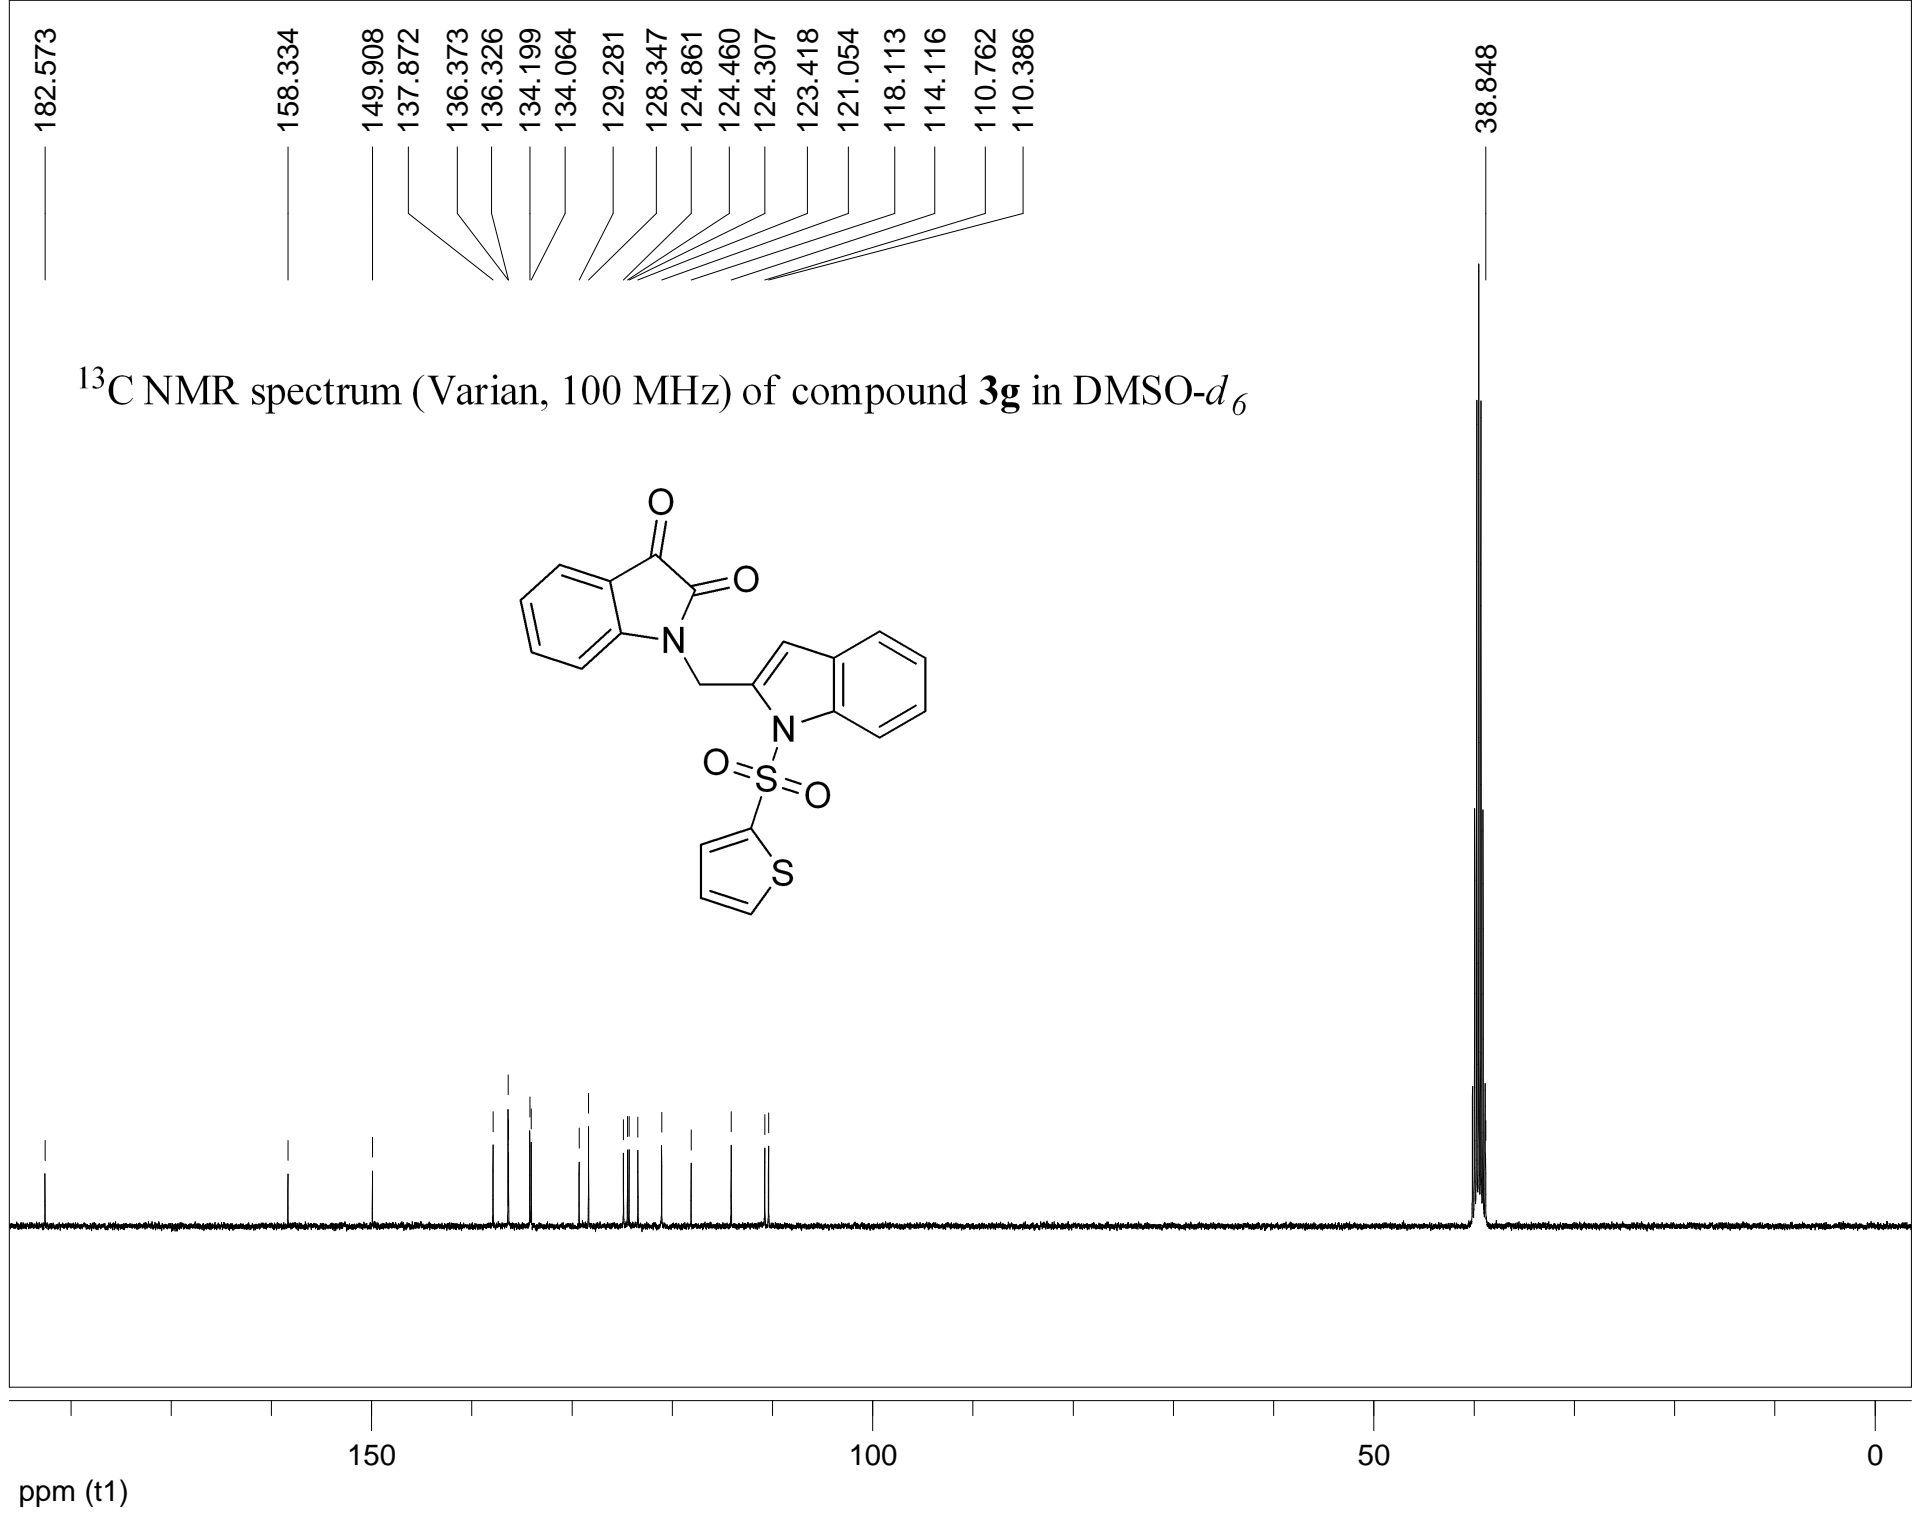

$^1\text{H}$  NMR (Varian, 400 MHz) spectrum of compound **3h** in  $\text{DMSO-}d_6$

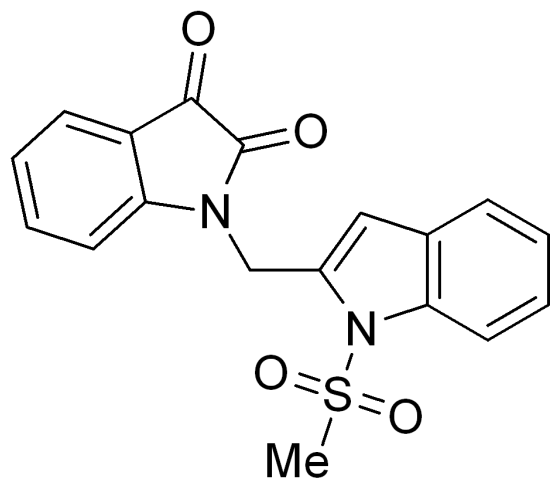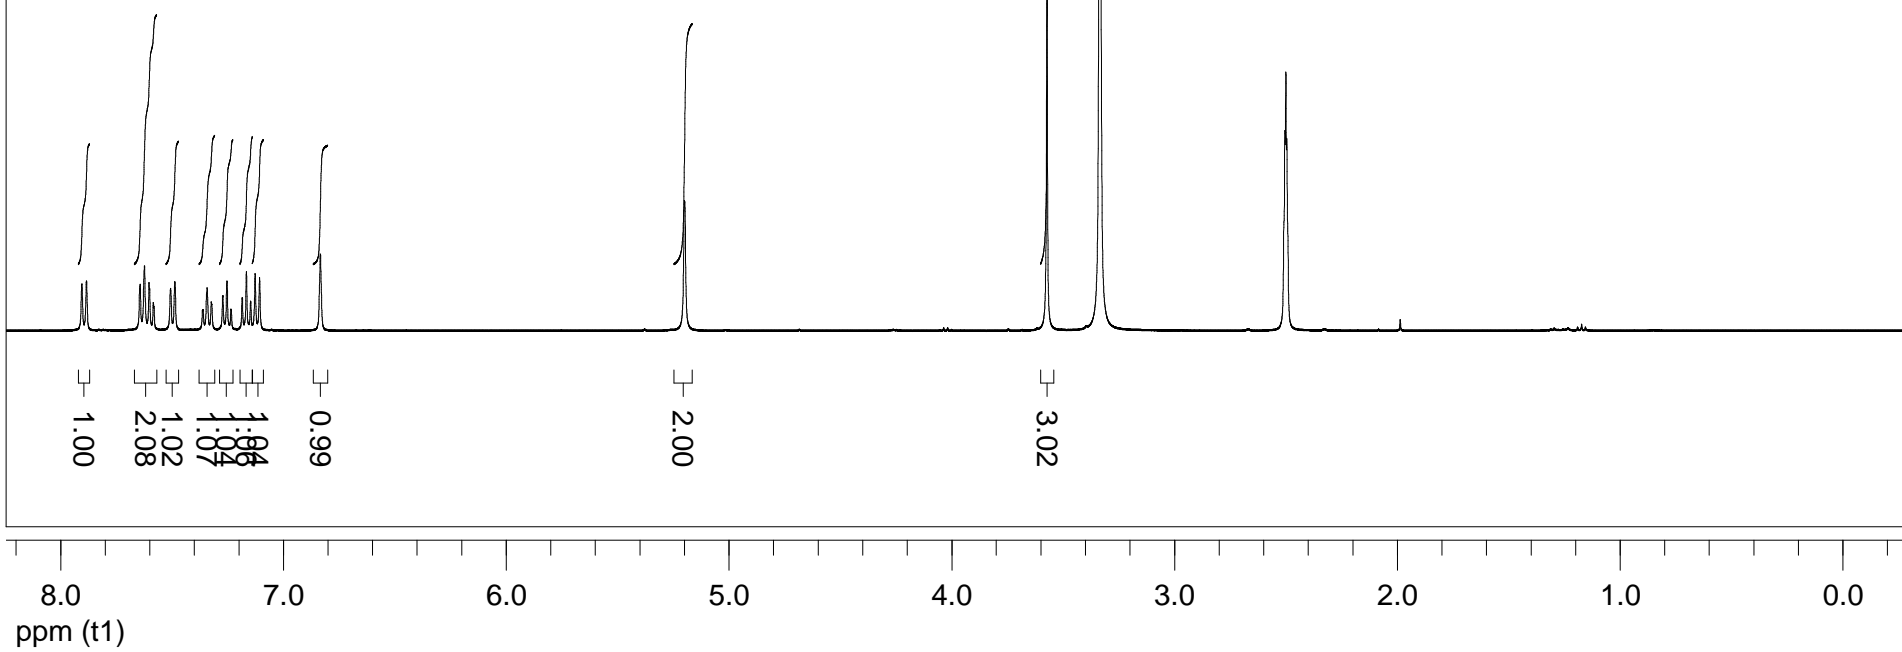



182.750

158.406

150.133

137.863

136.393

134.392

128.675

124.411

124.354

123.485

123.435

120.807

118.074

113.415

111.260

107.666

41.067

38.432

$^{13}\text{C}$  NMR spectrum (Varian, 100 MHz) of compound **3h** in  $\text{DMSO-}d_6$

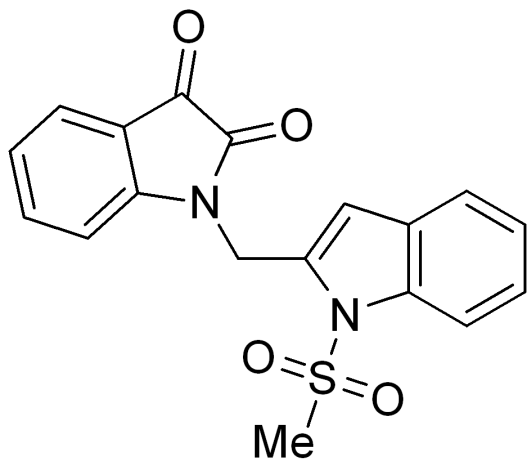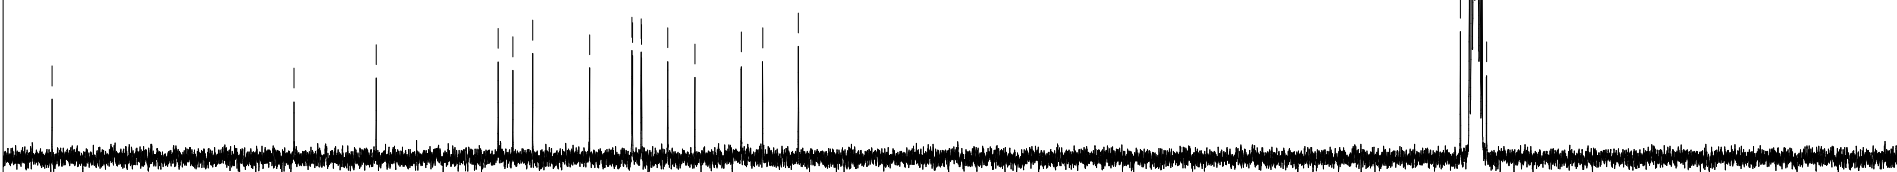

ppm (t1)

150

100

50

0

$^1\text{H}$  NMR (Varian, 400 MHz) spectrum of compound **3i** in  $\text{DMSO-}d_6$

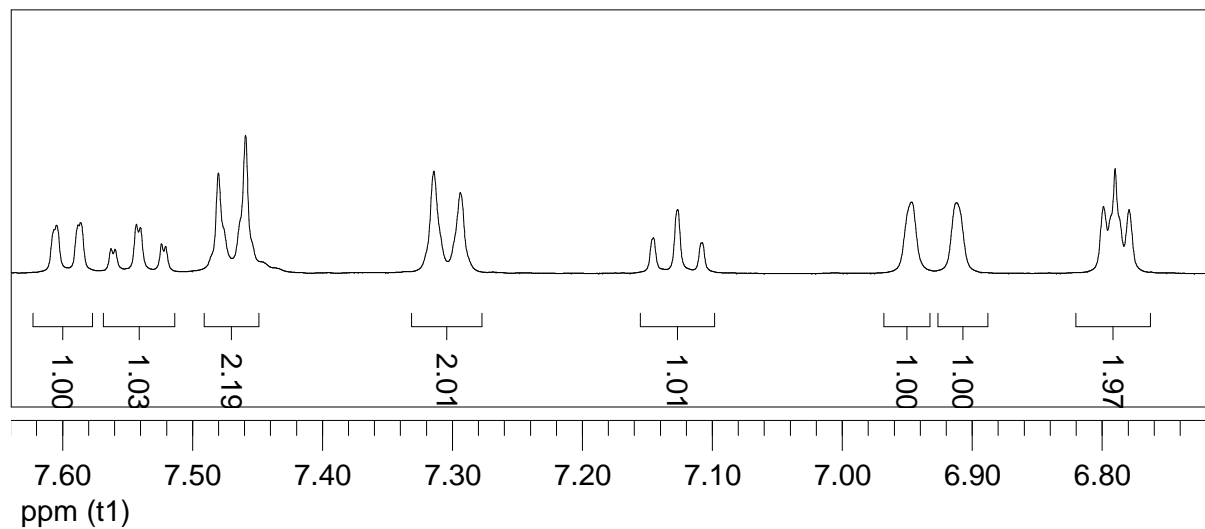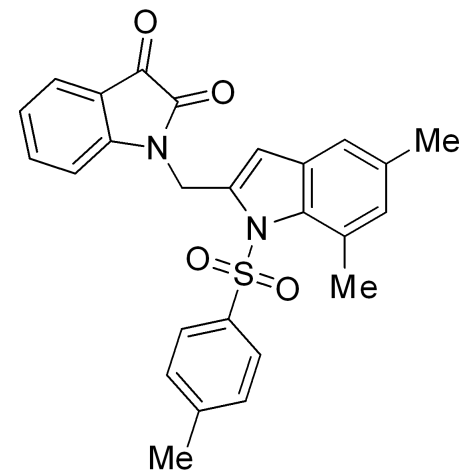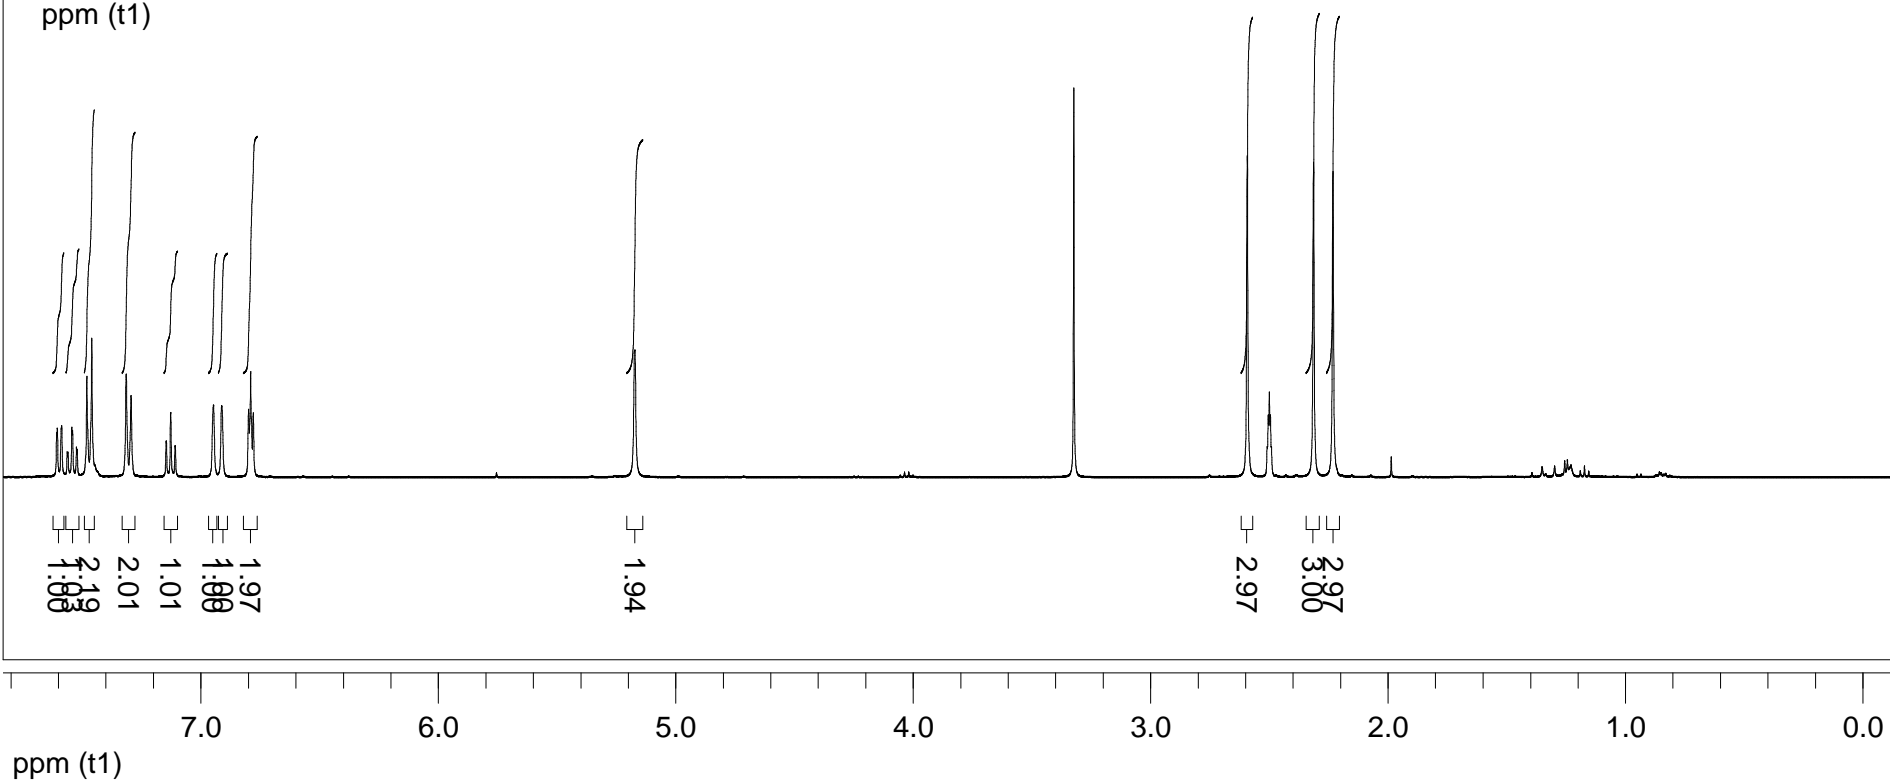

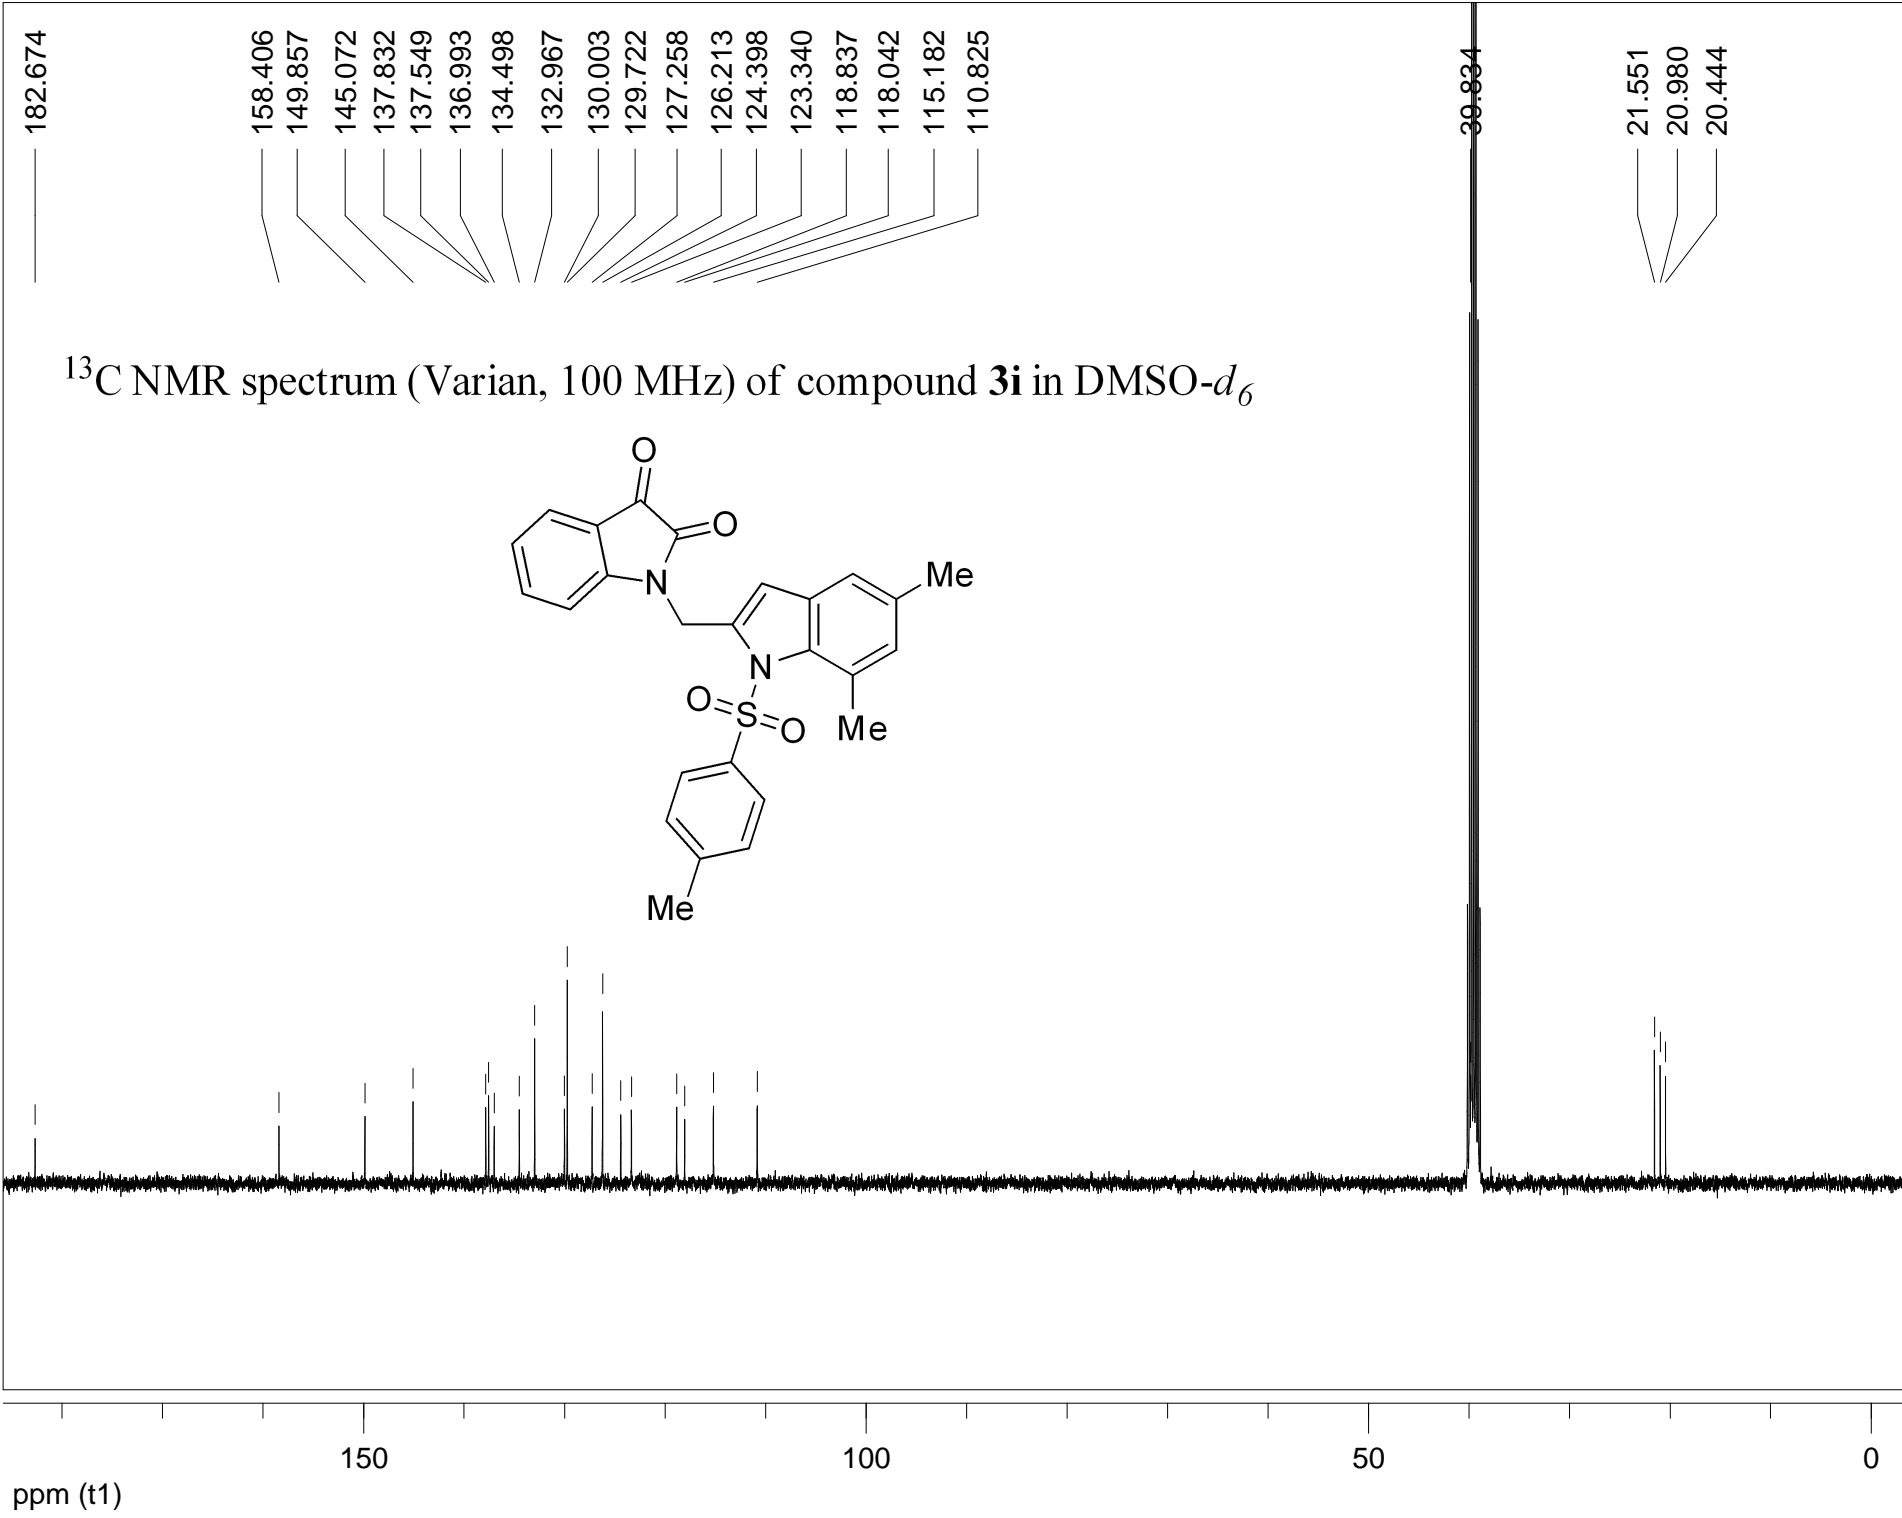

182.674  
158.406  
149.857  
145.072  
137.832  
137.549  
136.993  
134.498  
132.967  
130.003  
129.722  
127.258  
126.213  
124.398  
123.340  
118.837  
118.042  
115.182  
110.825

39.834  
21.551  
20.980  
20.444

ppm (t1) 150 100 50 0

$^1\text{H}$  NMR (Varian, 400 MHz) spectrum of compound **3j** in  $\text{DMSO-}d_6$

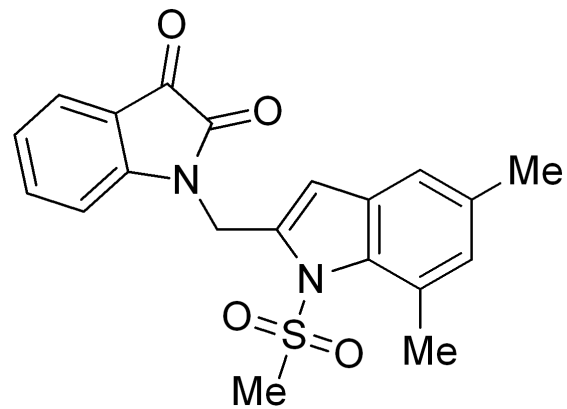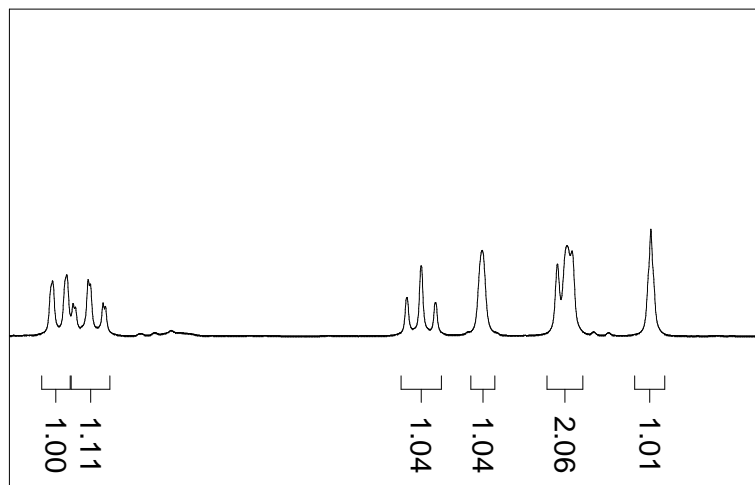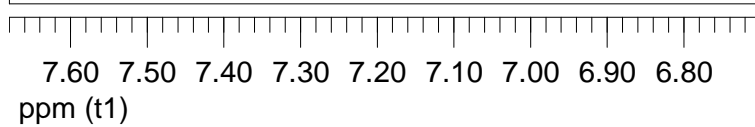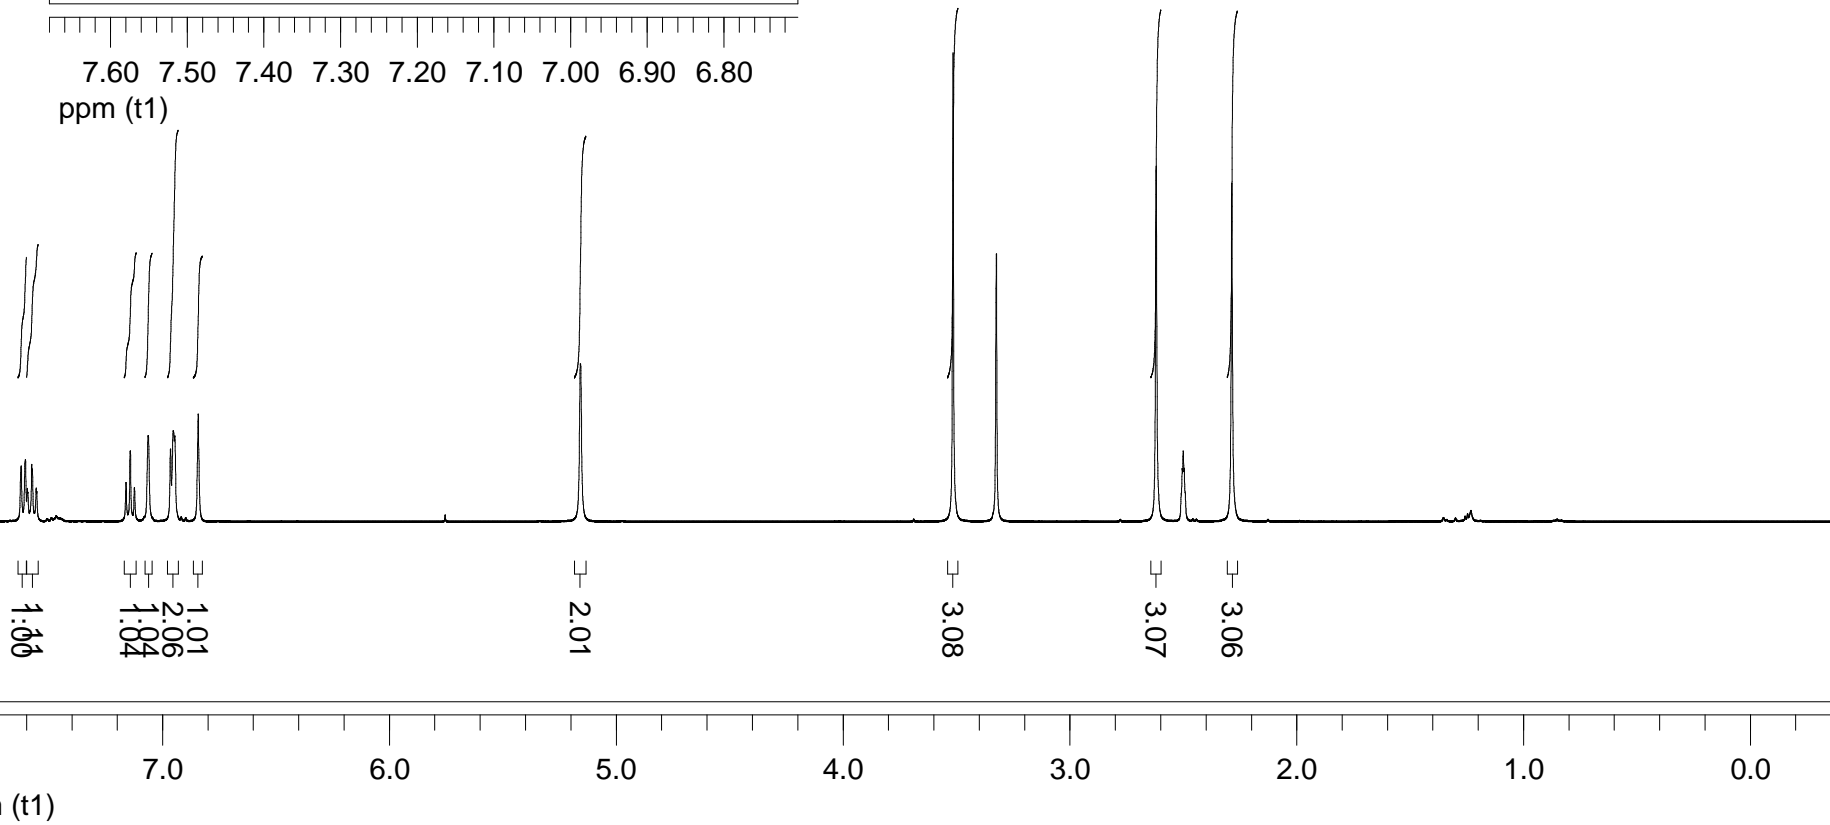

ppm (t1)

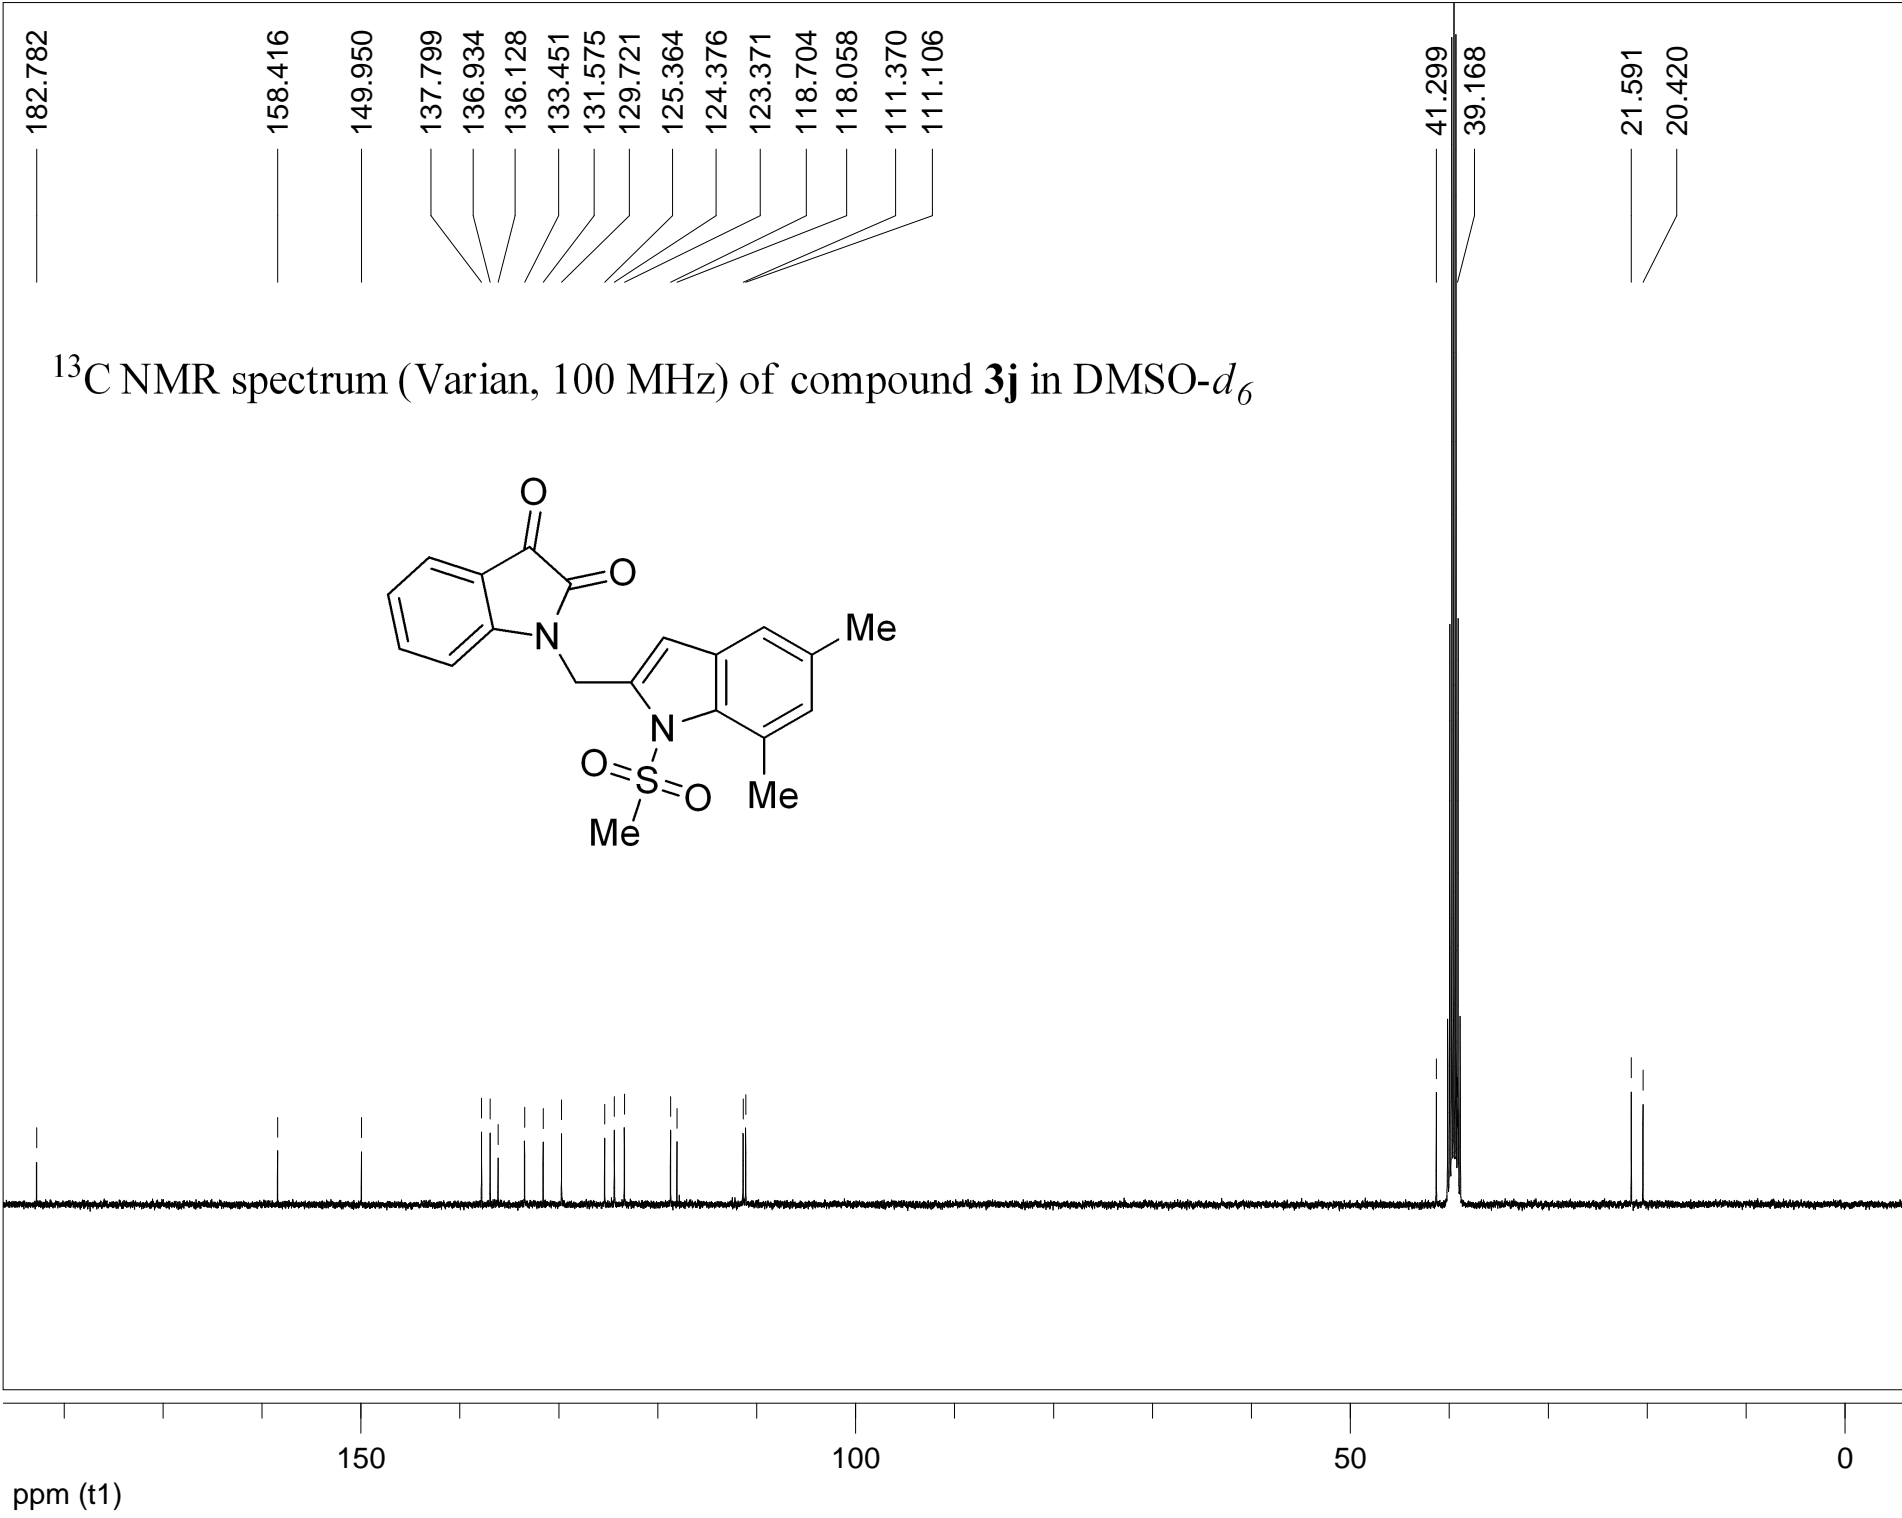

$^1\text{H}$  NMR (Varian, 400 MHz) spectrum of compound **3k** in  $\text{DMSO-}d_6$

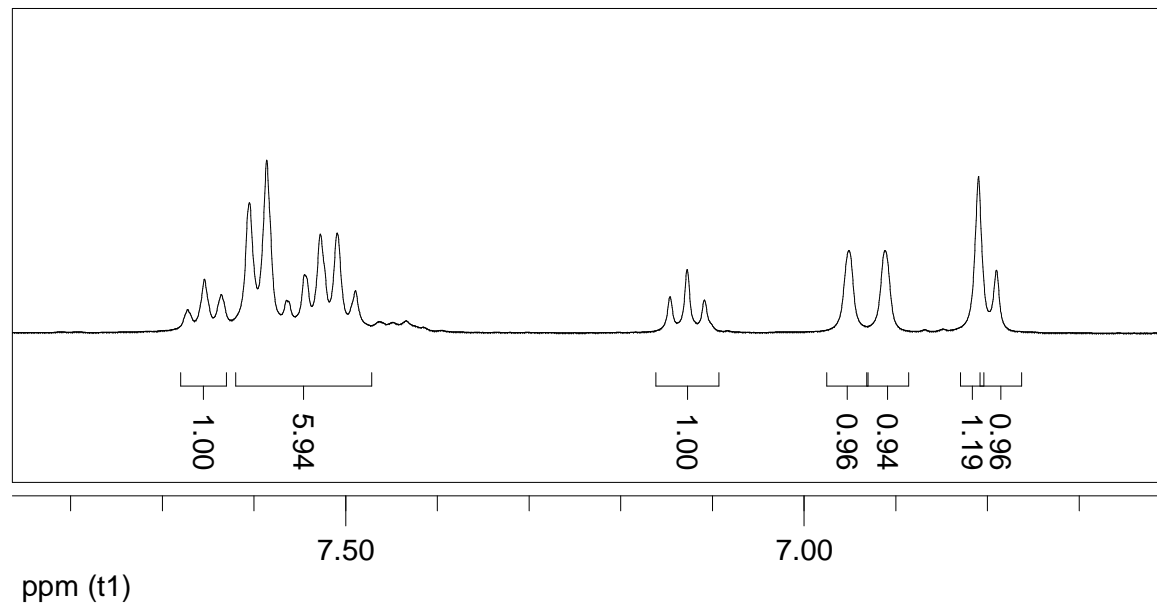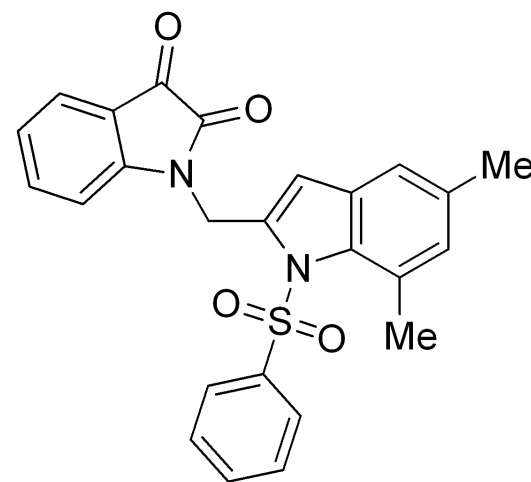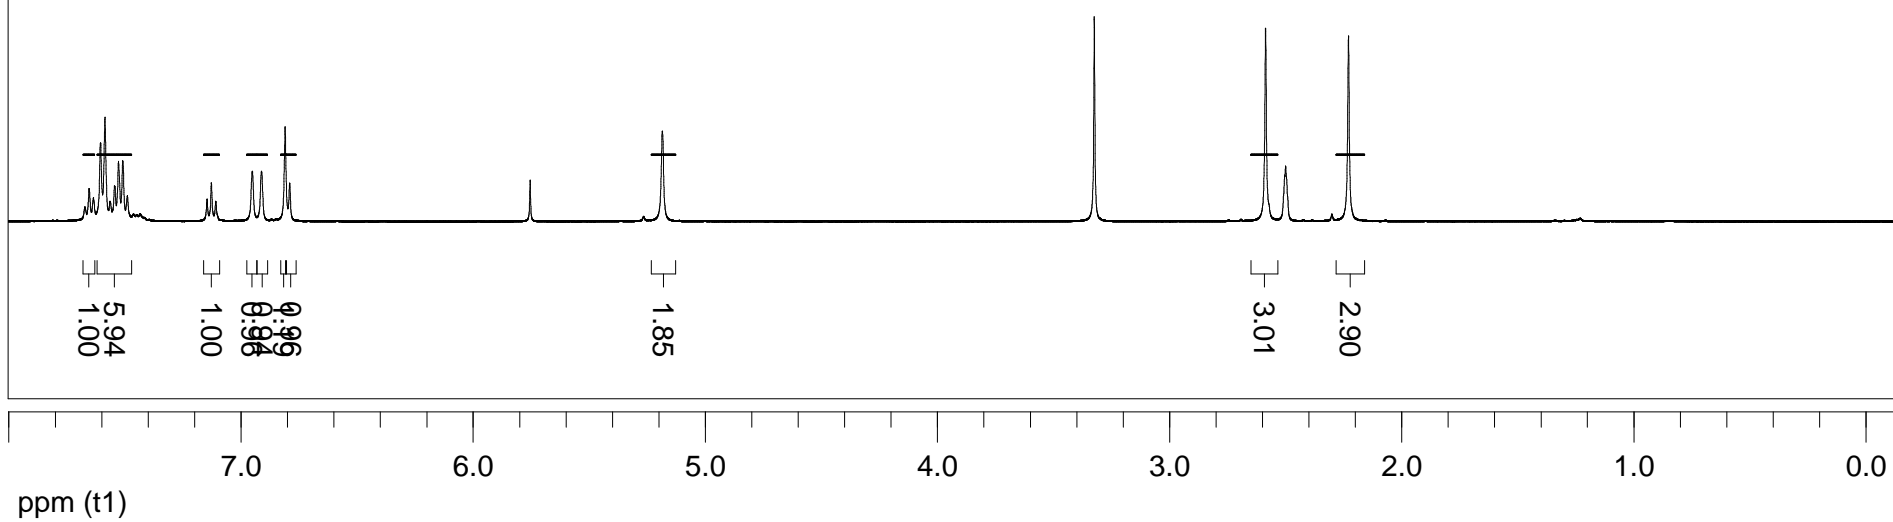

182.660  
158.416  
149.842  
137.834  
137.562  
136.963  
135.696  
134.567  
134.375  
132.909  
130.031  
129.319  
127.181  
126.155  
124.400  
123.342  
118.858  
118.048  
115.238  
110.812

$^{13}\text{C}$  NMR spectrum (Varian, 100 MHz) of compound **3k** in  $\text{DMSO-}d_6$

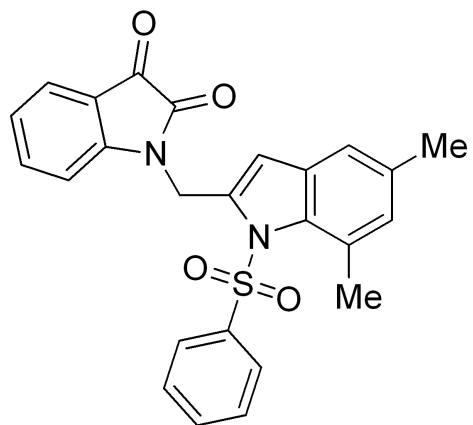

39.101  
21.490  
20.428

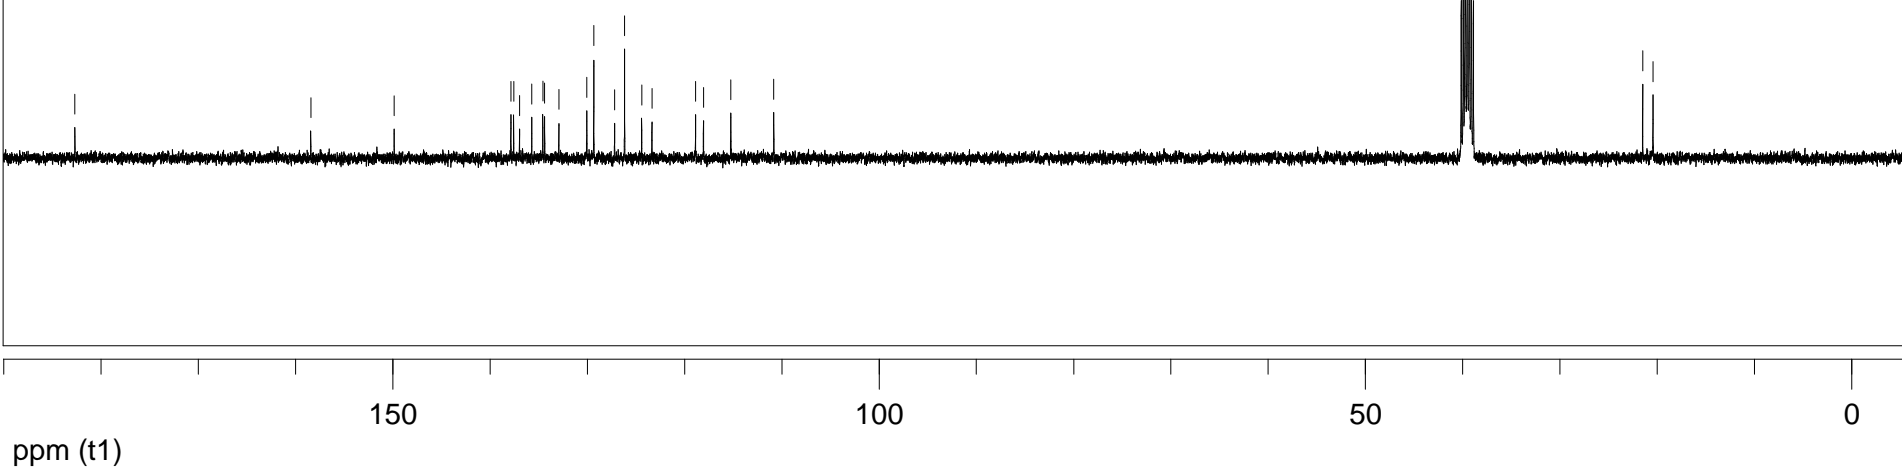

$^1\text{H}$  NMR (Varian, 400 MHz) spectrum of compound **4a** in  $\text{DMSO-}d_6$

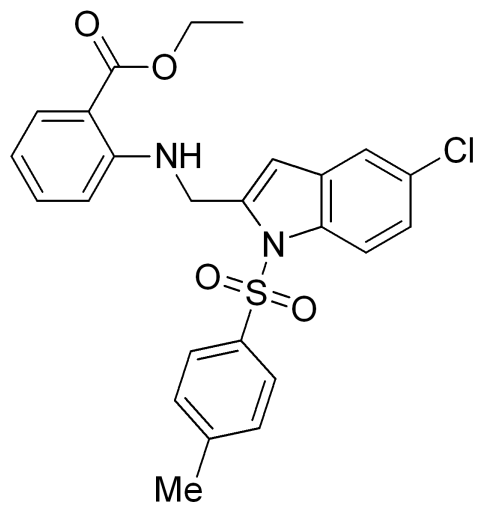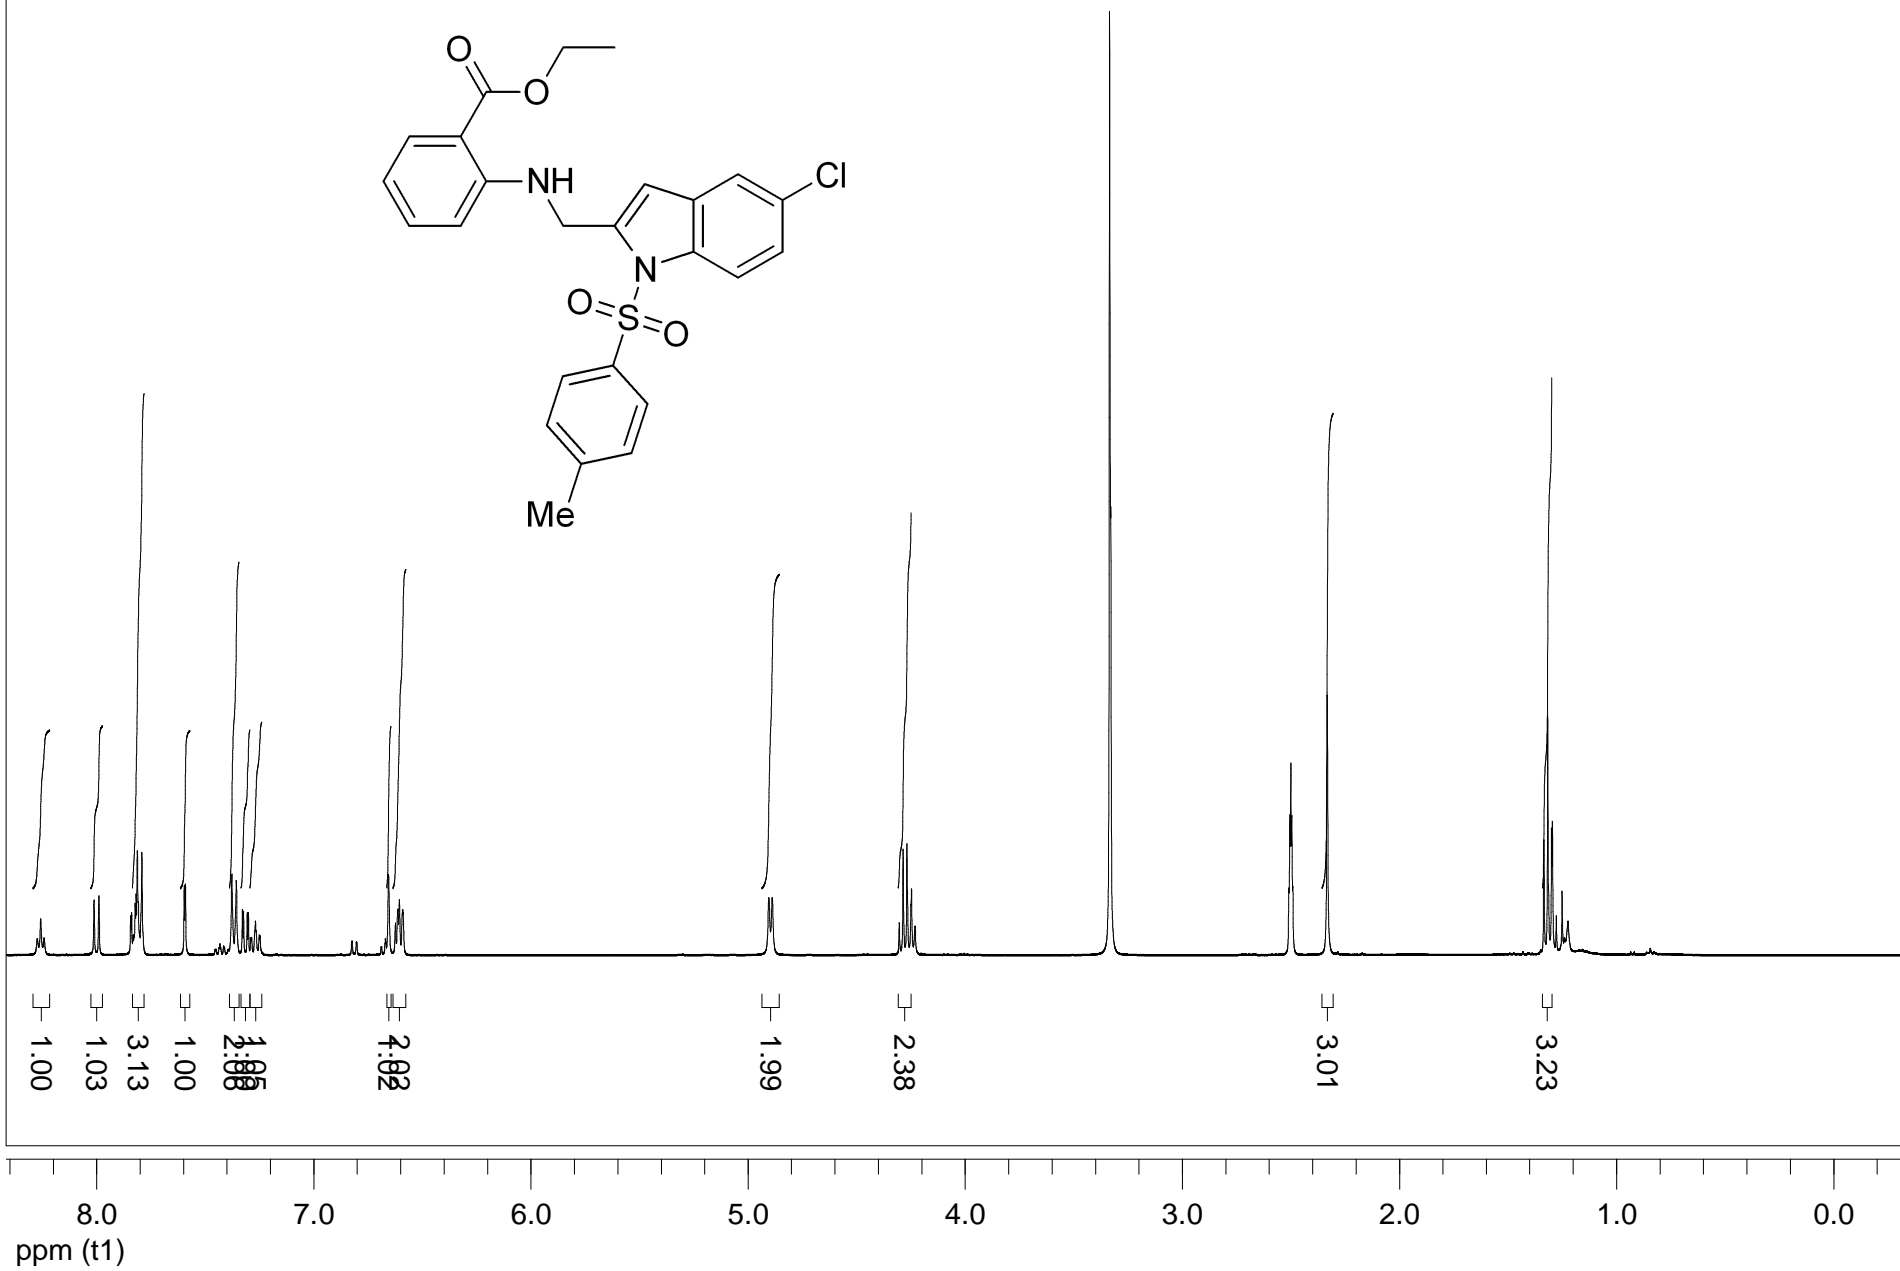



167.558  
149.720  
145.806  
140.398  
134.934  
134.573  
134.291  
131.237  
130.510  
130.332  
128.312  
126.472  
124.348  
120.438  
115.511  
115.109  
111.700  
110.131  
109.538

60.183

40.533

21.034

14.179

$^{13}\text{C}$  NMR spectrum (Varian, 100 MHz) of compound **4a** in  $\text{DMSO-}d_6$

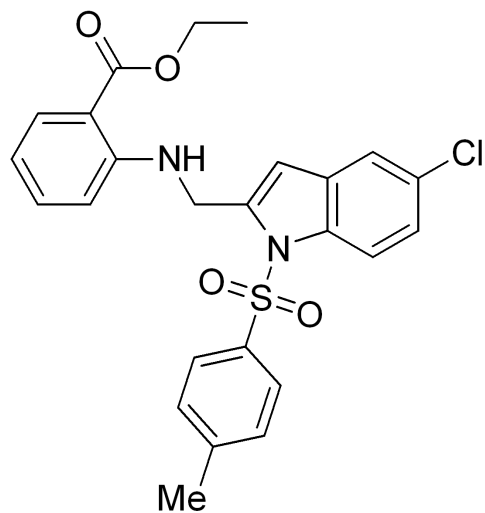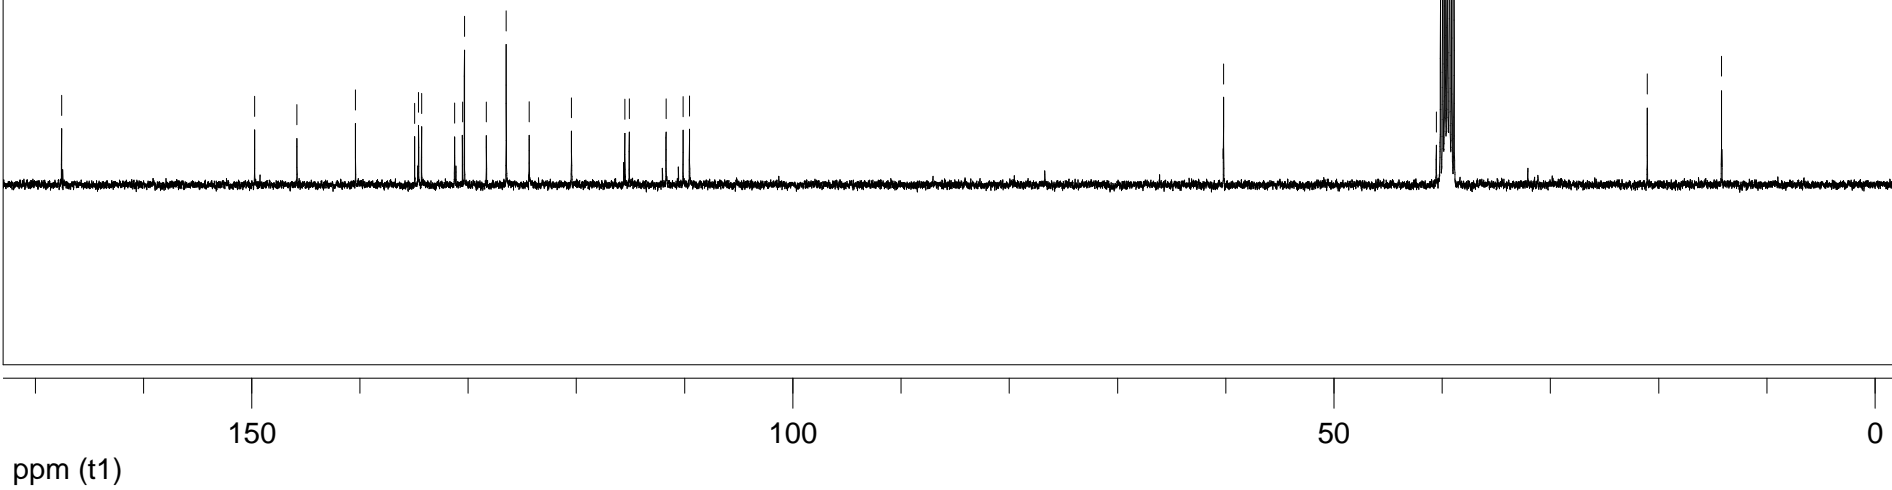

$^1\text{H}$  NMR (Varian, 400 MHz) spectrum of compound **4b** in  $\text{DMSO-}d_6$

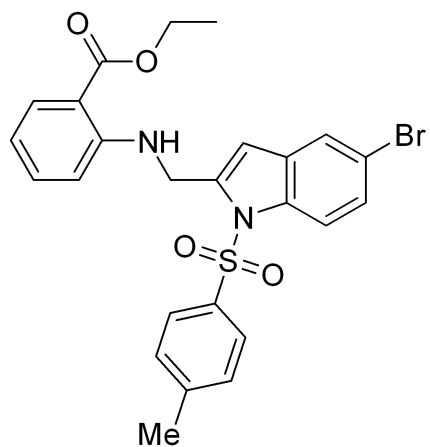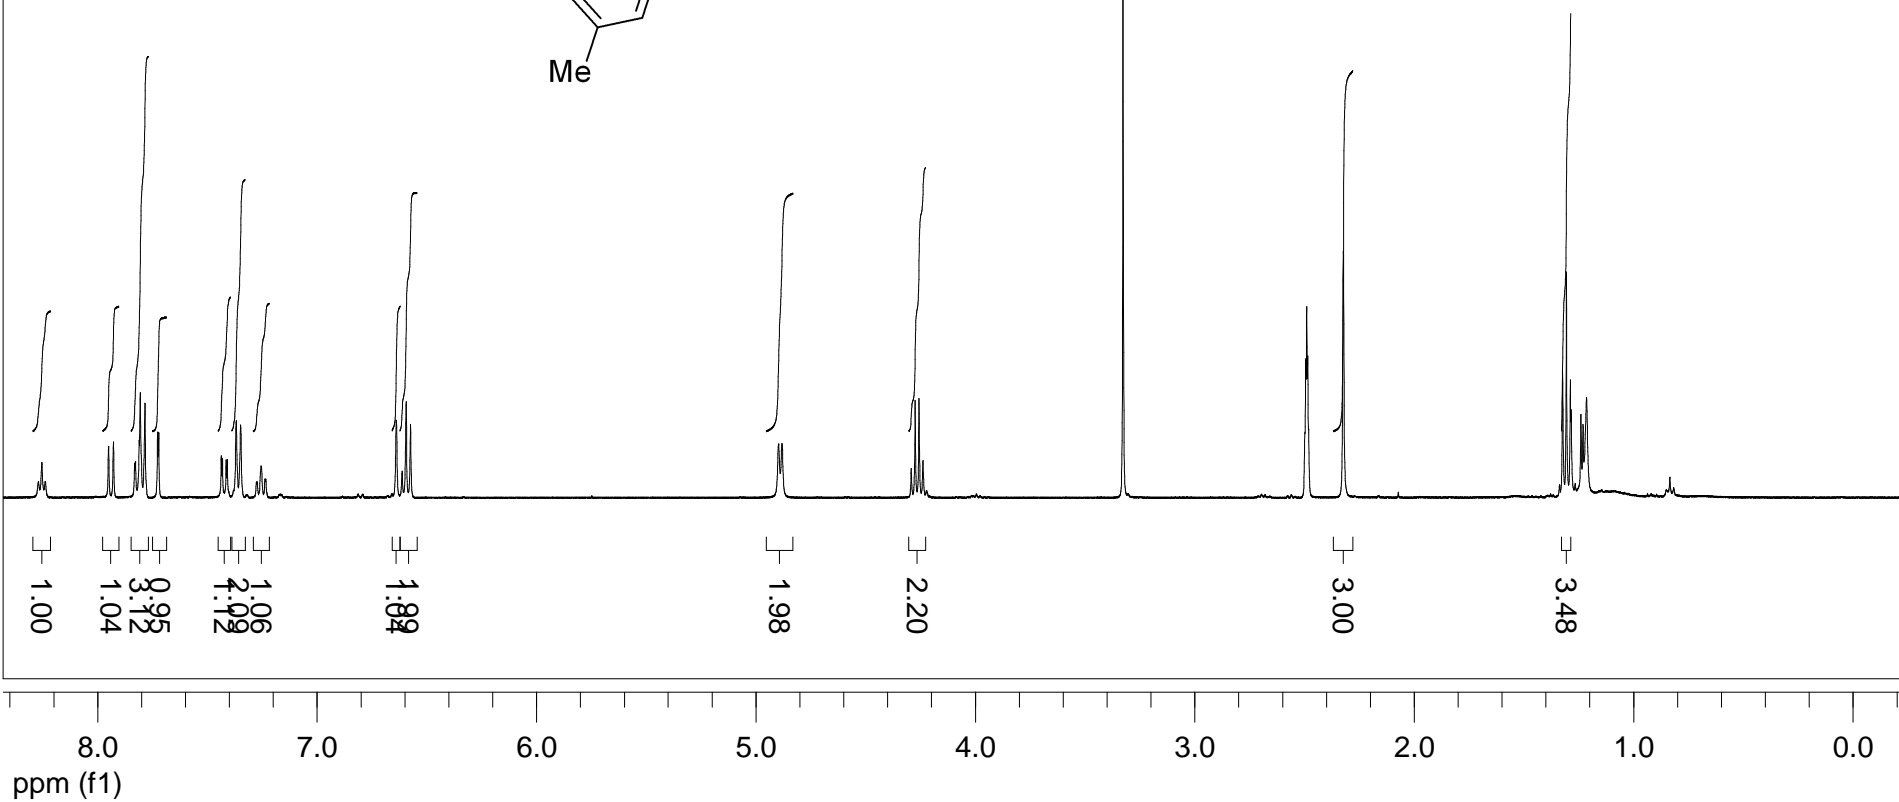

$^{13}\text{C}$  NMR spectrum (Varian, 100 MHz) of compound **4b** in  $\text{DMSO-}d_6$

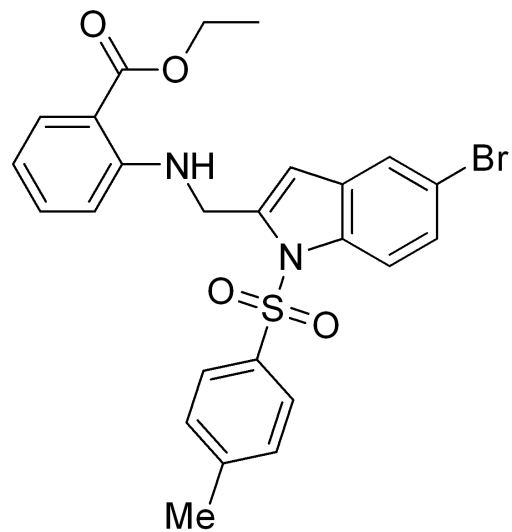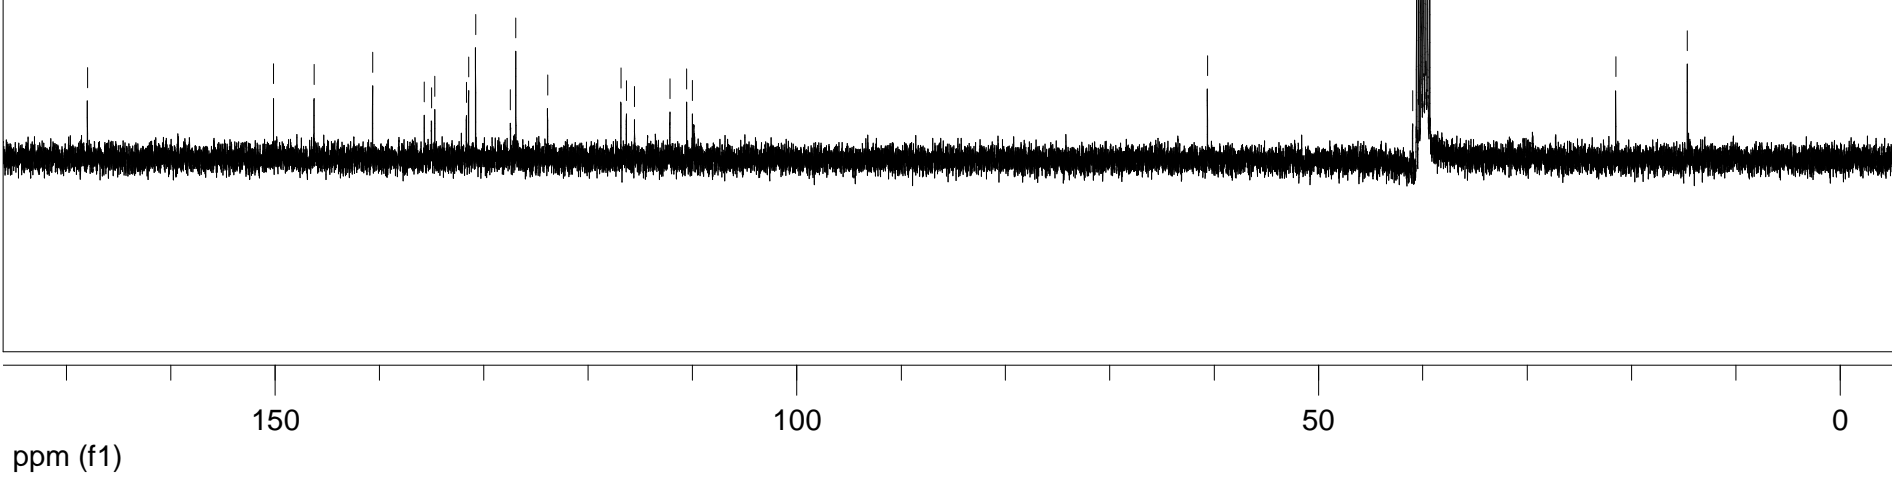

$^1\text{H}$  NMR (Varian, 400 MHz) spectrum of compound **4c** in  $\text{DMSO-}d_6$

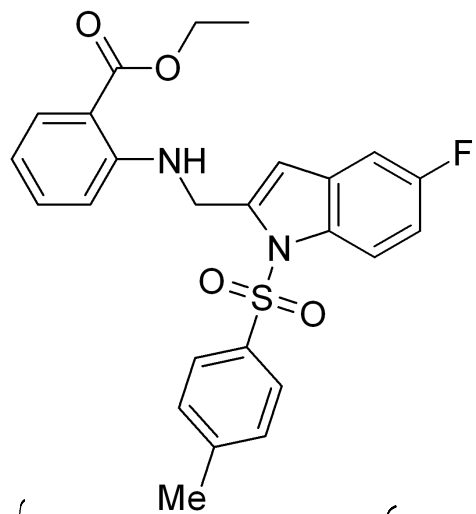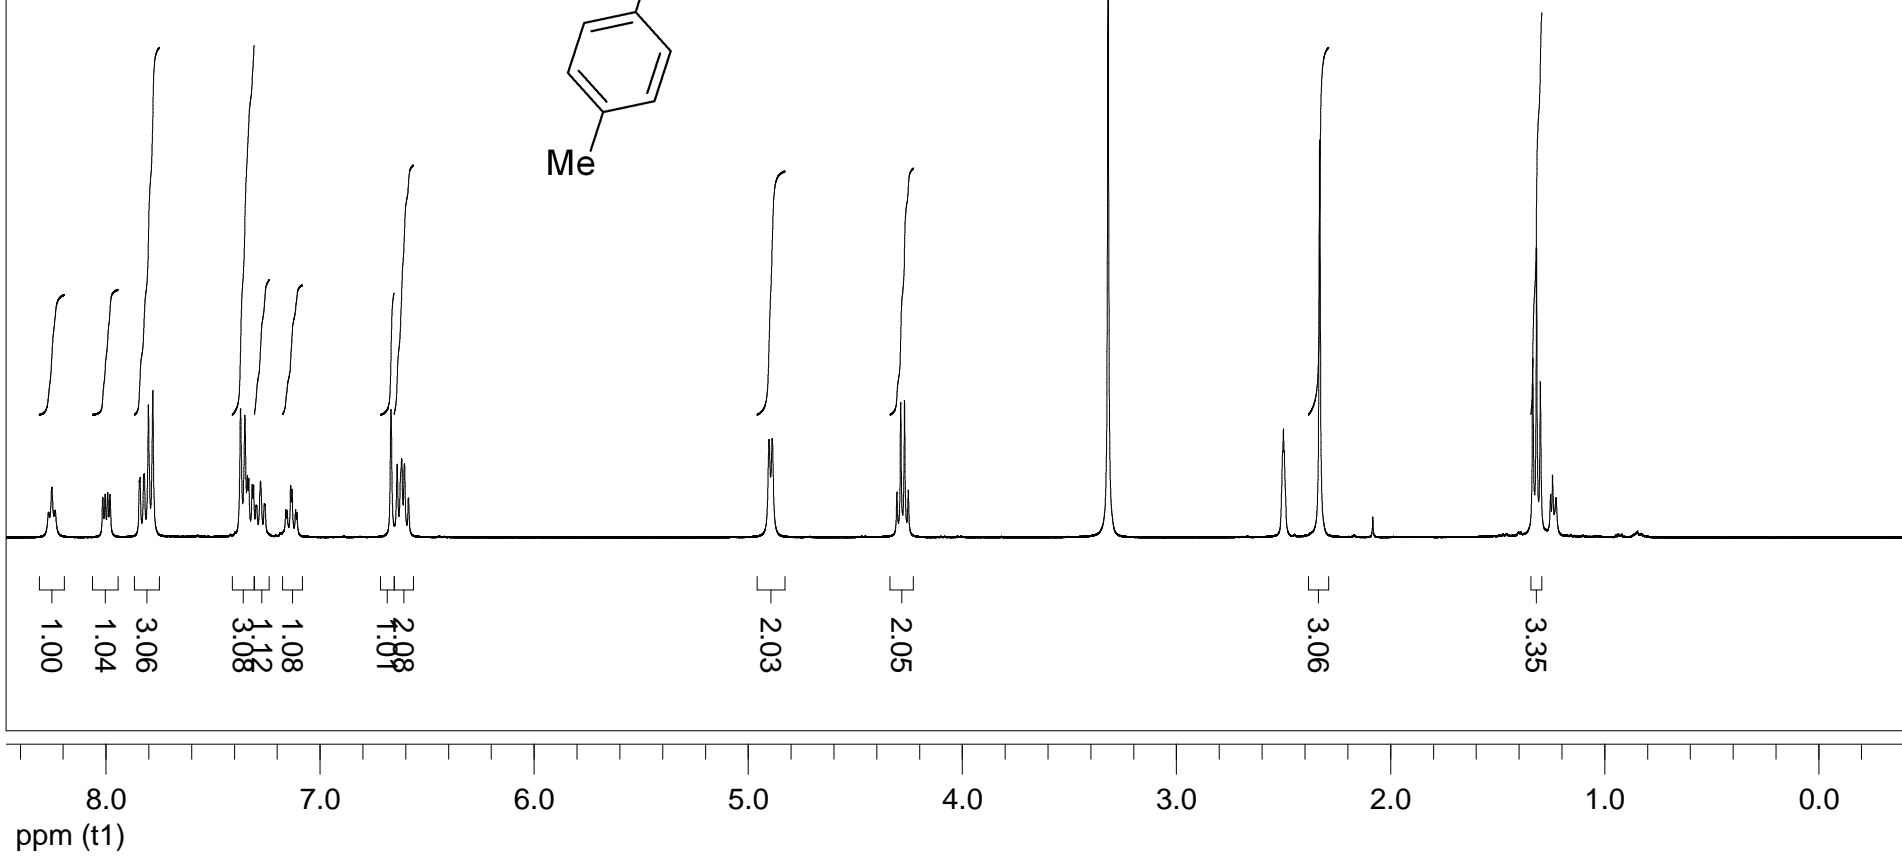

167.538  
160.197  
157.829  
149.718  
147.880  
145.662  
140.583  
134.547  
134.335  
132.859  
131.800  
131.215  
130.259  
130.167  
126.415  
115.437  
115.341  
115.064  
112.221  
111.968  
111.680  
110.118  
110.063  
106.660  
106.421

60.147

40.537

20.993

14.147

$^{13}\text{C}$  NMR spectrum (Varian, 100 MHz) of compound **4c** in  $\text{DMSO-}d_6$

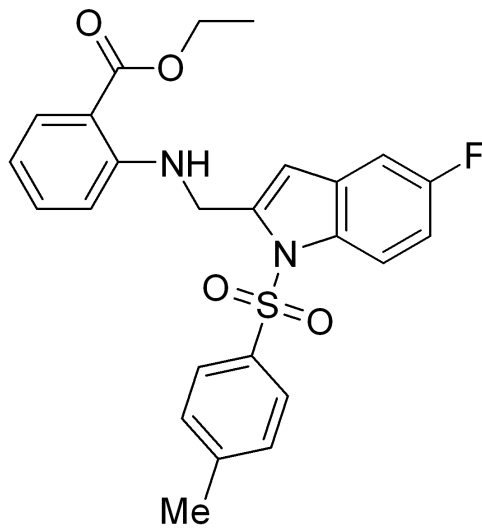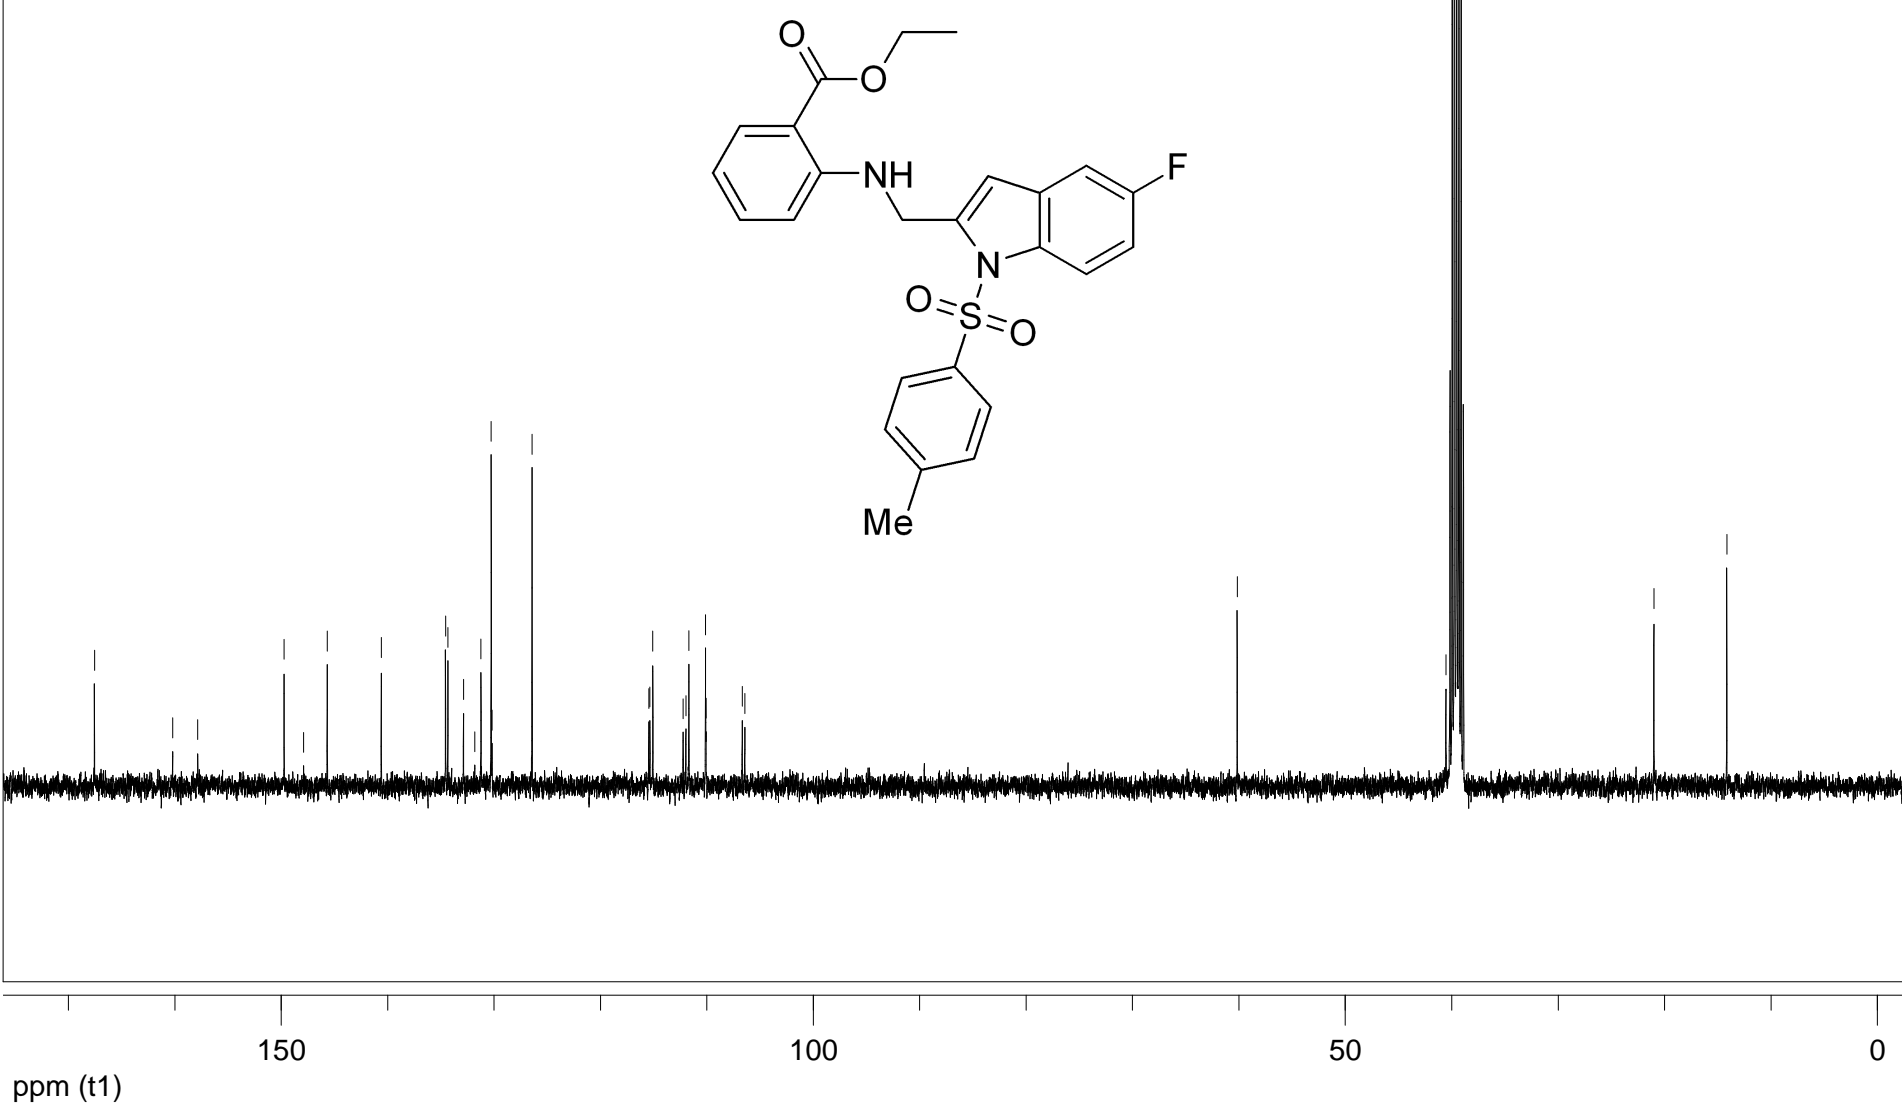

$^1\text{H}$  NMR (Varian, 400 MHz) spectrum of compound **4d** in  $\text{CDCl}_3$

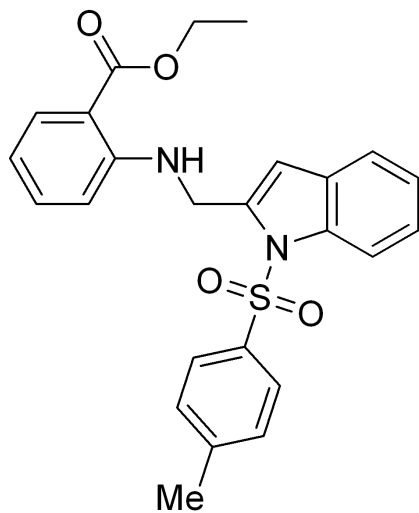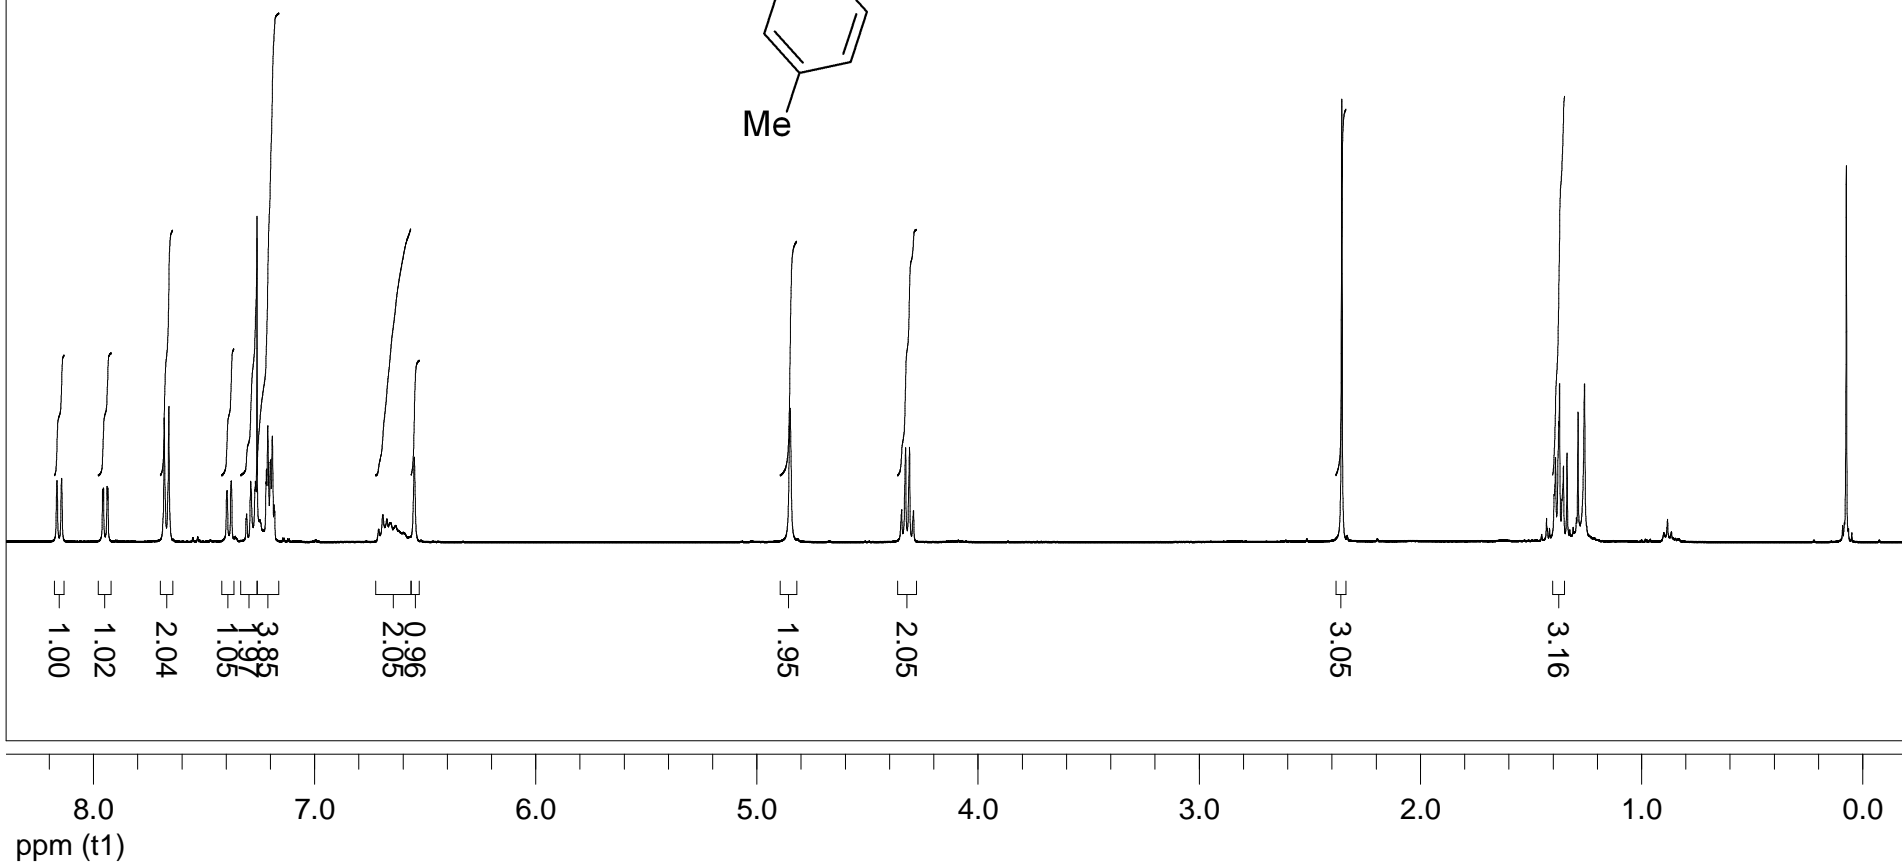

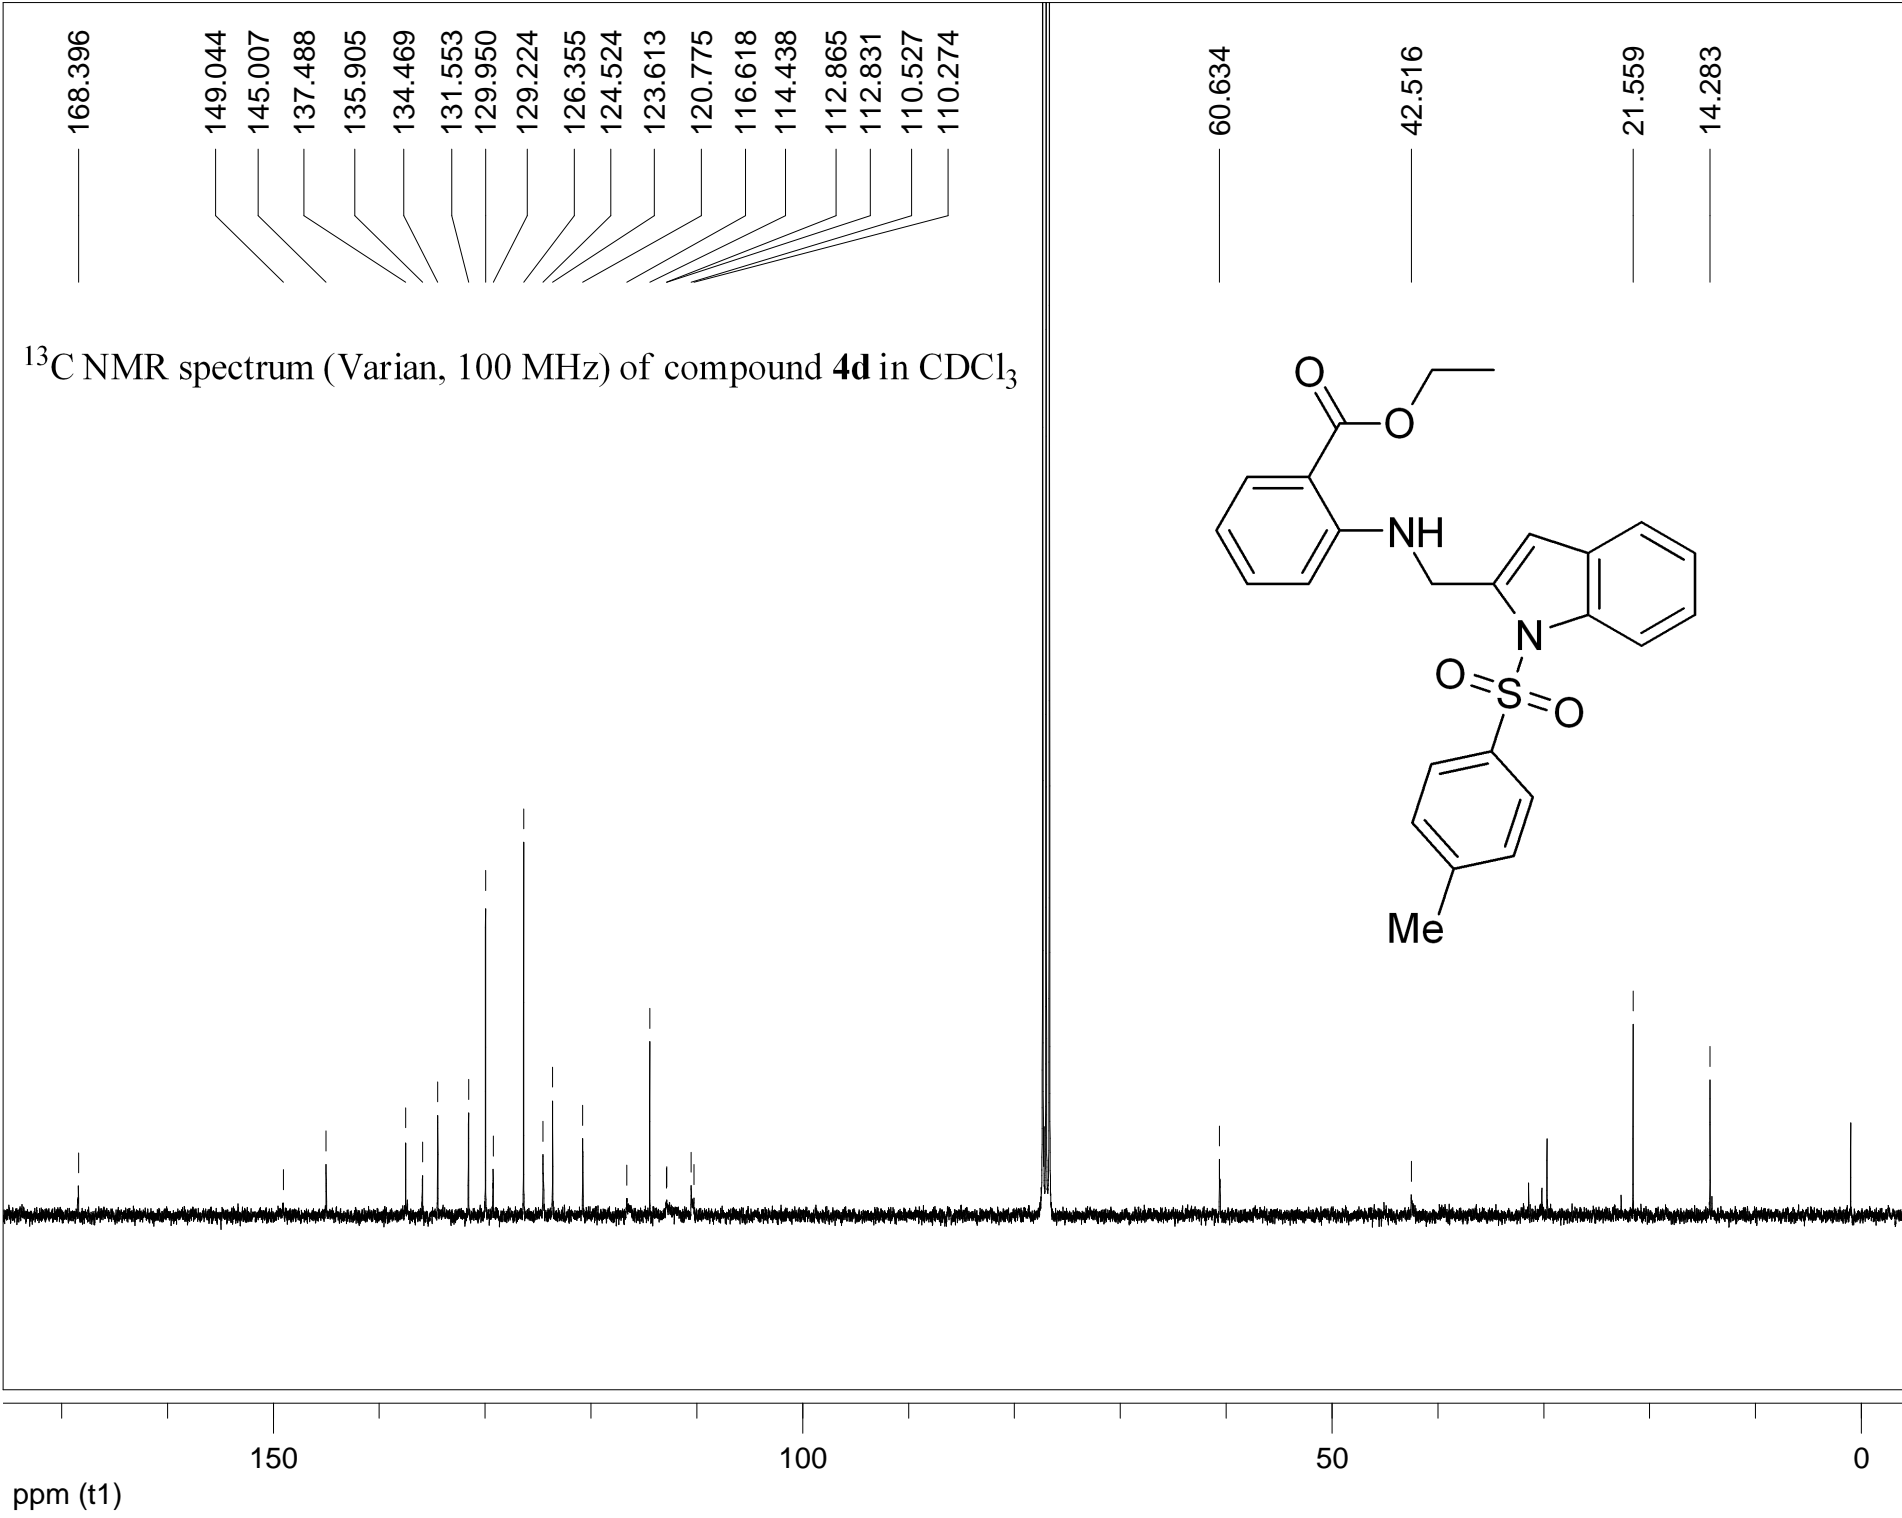

$^1\text{H}$  NMR (Varian, 400 MHz) spectrum of compound **4e** in  $\text{DMSO-}d_6$

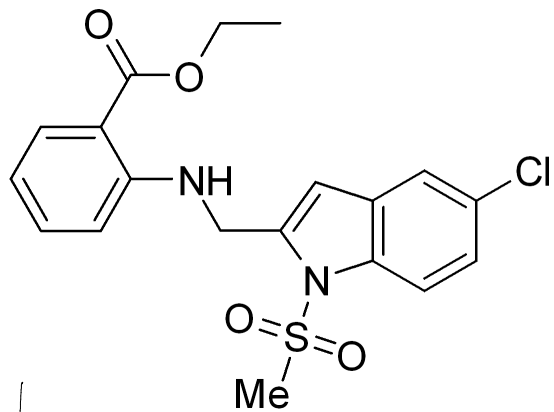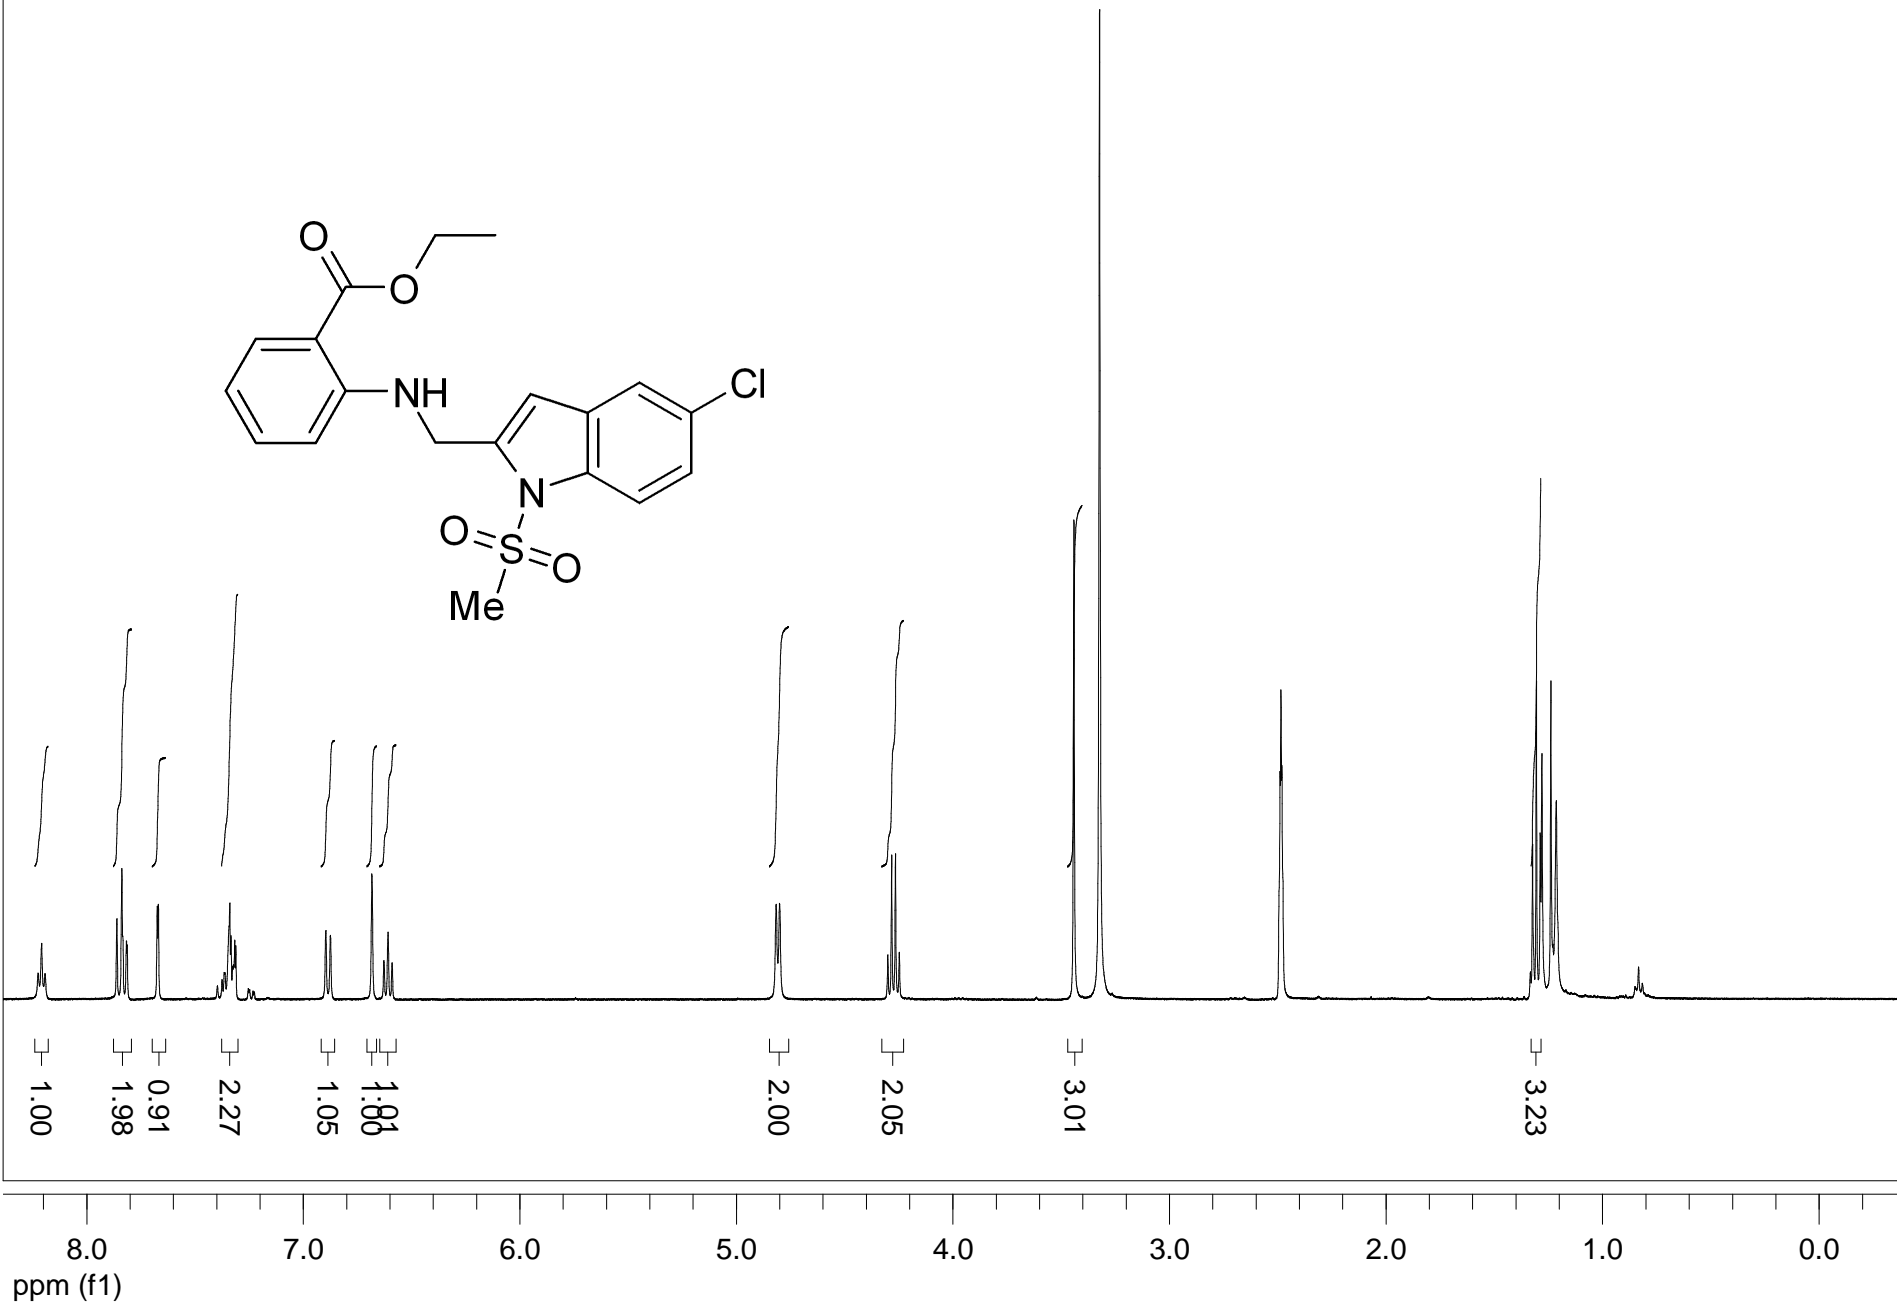



168.125  
150.306  
140.728  
135.246  
135.169  
131.670  
130.578  
128.336  
124.482  
120.693  
115.572  
115.492  
112.390  
110.393  
108.547

60.671

41.528

40.451

14.636

$^{13}\text{C}$  NMR spectrum (Varian, 100 MHz) of compound **4e** in  $\text{DMSO-}d_6$

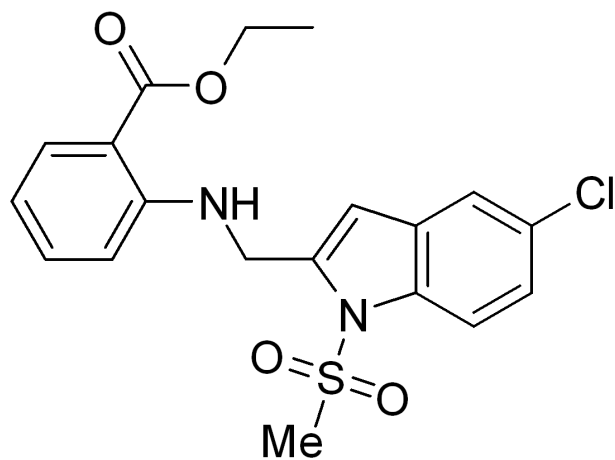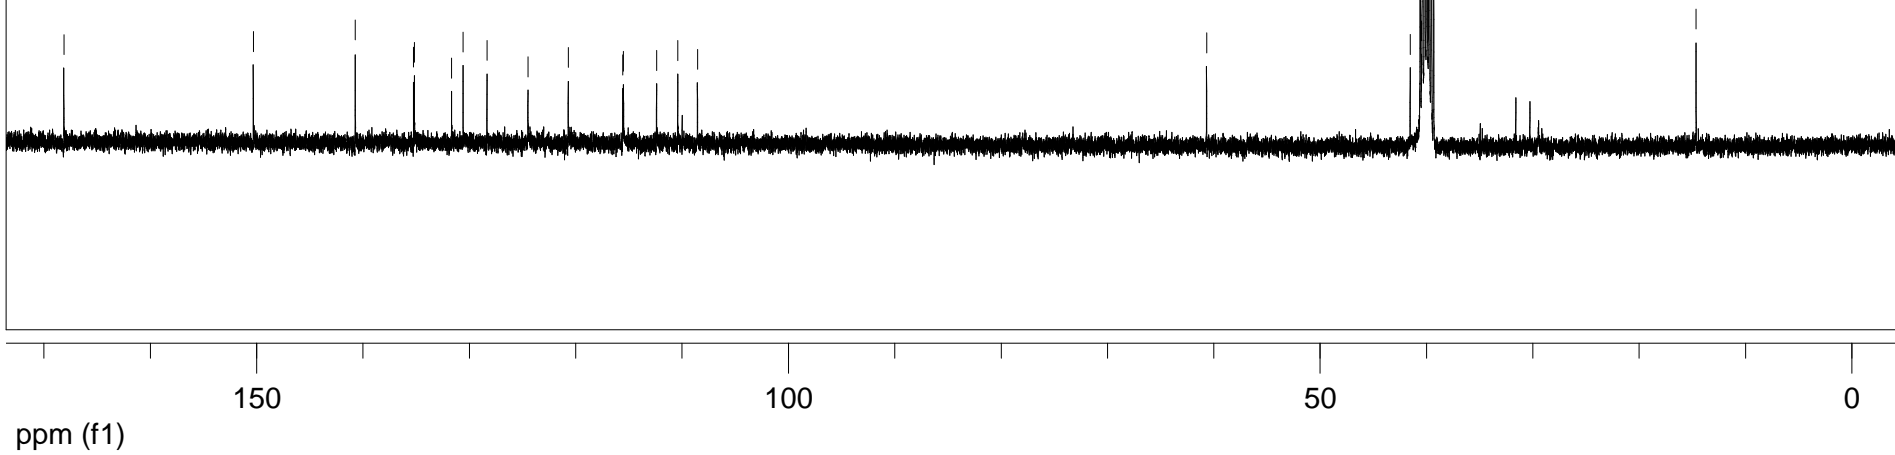

D<sub>2</sub>O exchange spectrum of compound **4e** in DMSO-*d*<sub>6</sub>

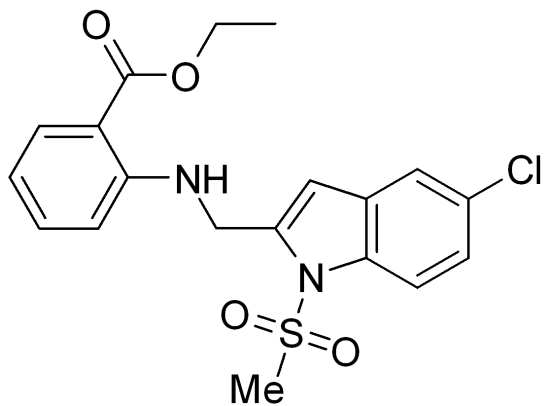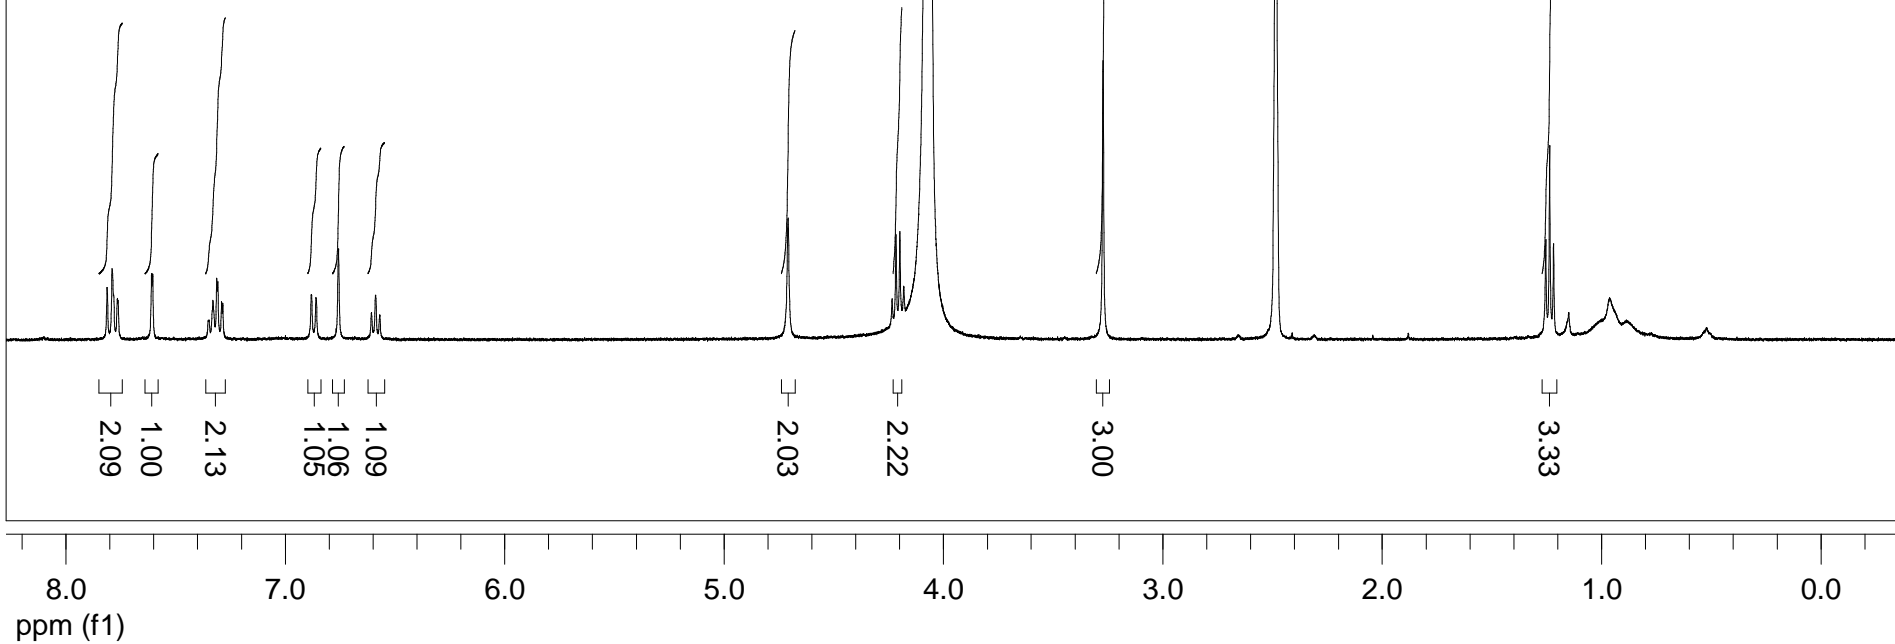

$^1\text{H}$  NMR (Varian, 400 MHz) spectrum of compound **4f** in  $\text{DMSO-}d_6$

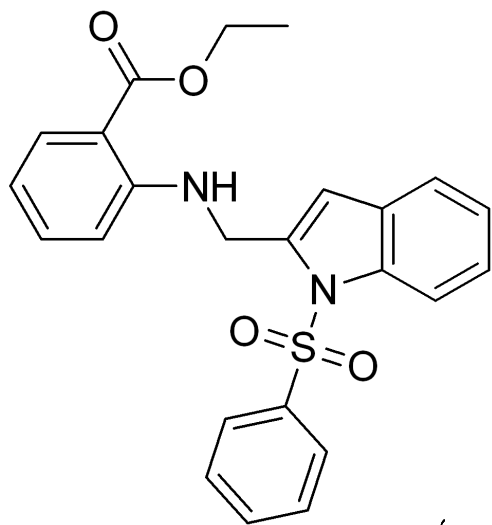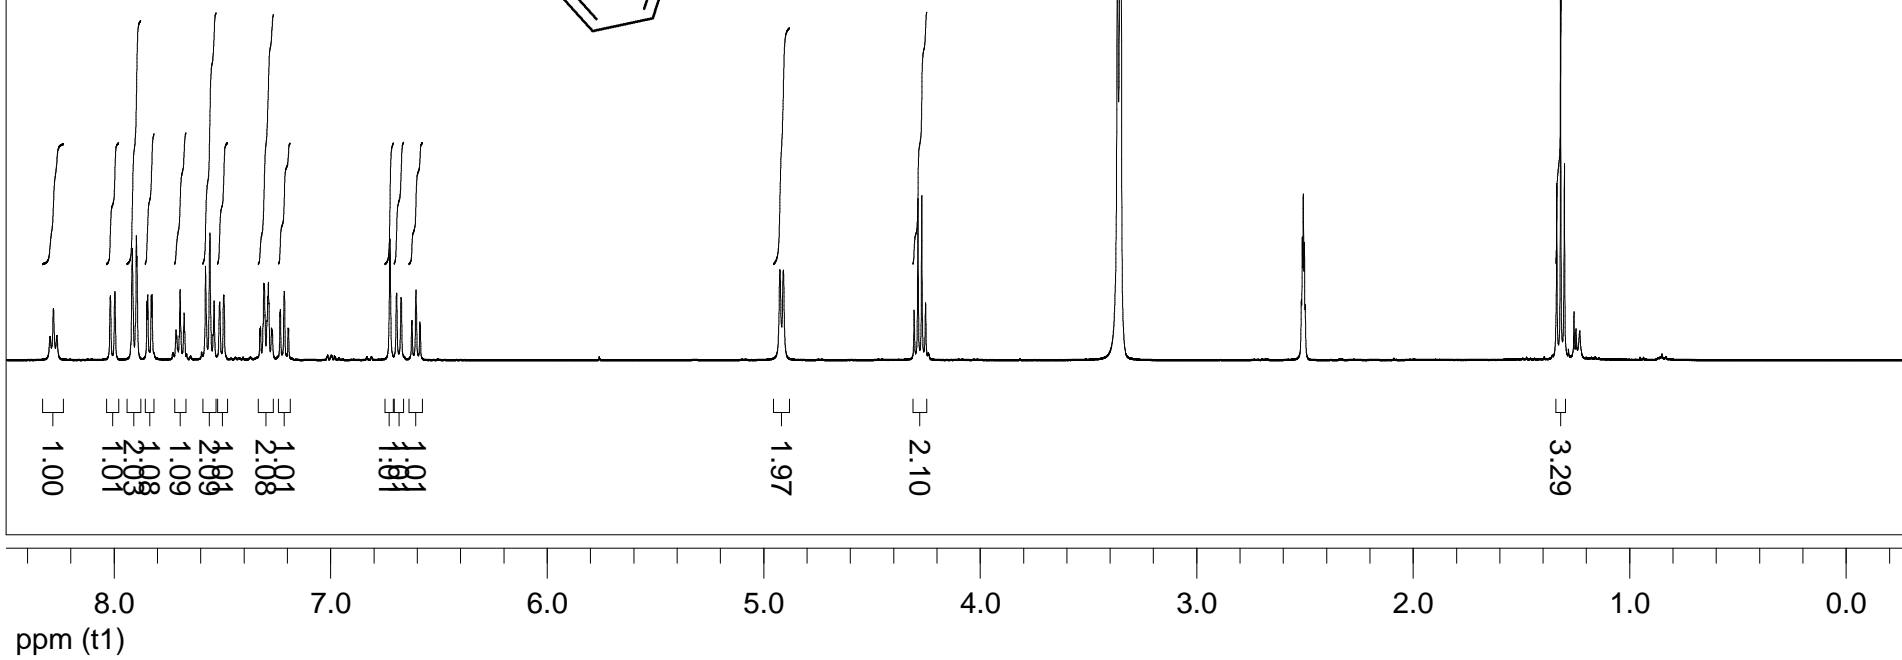

168.043  
150.264  
139.011  
137.895  
136.881  
135.115  
135.054  
131.714  
130.290  
129.451  
126.821  
125.073  
124.337  
121.516  
115.495  
114.483  
112.202  
111.029  
110.562

60.636

40.946

14.650

$^{13}\text{C}$  NMR spectrum (Varian, 100 MHz) of compound **4f** in  $\text{DMSO-}d_6$

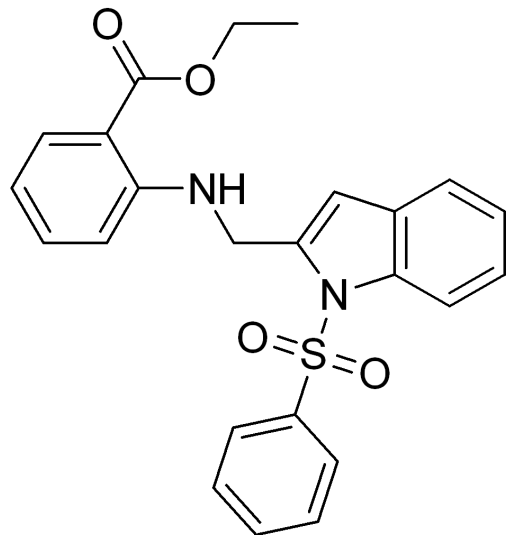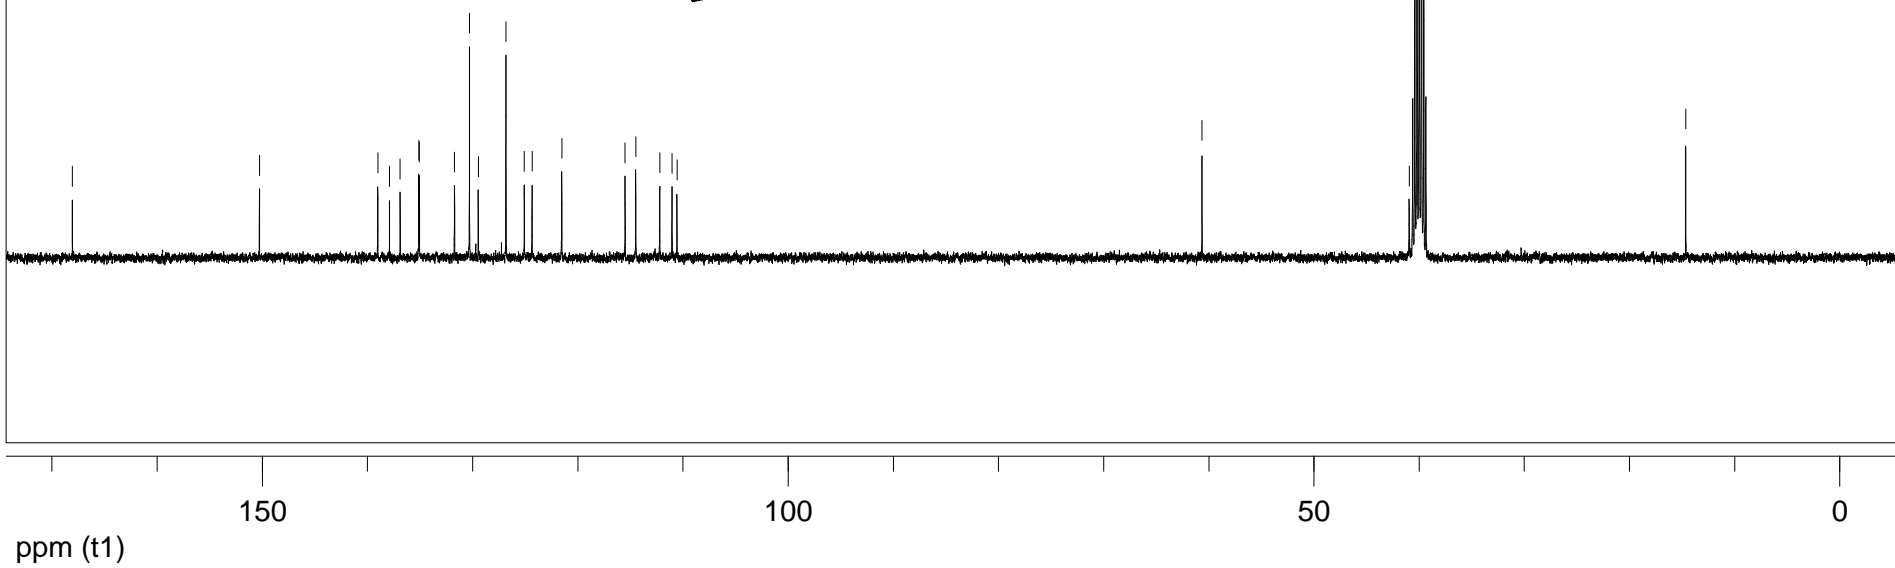

$^1\text{H}$  NMR (Varian, 400 MHz) spectrum of compound **4g** in  $\text{DMSO-}d_6$

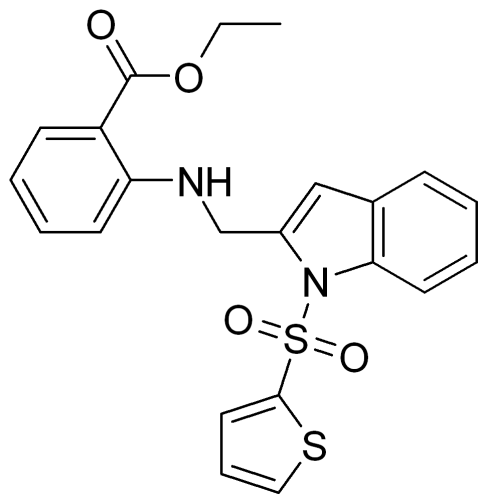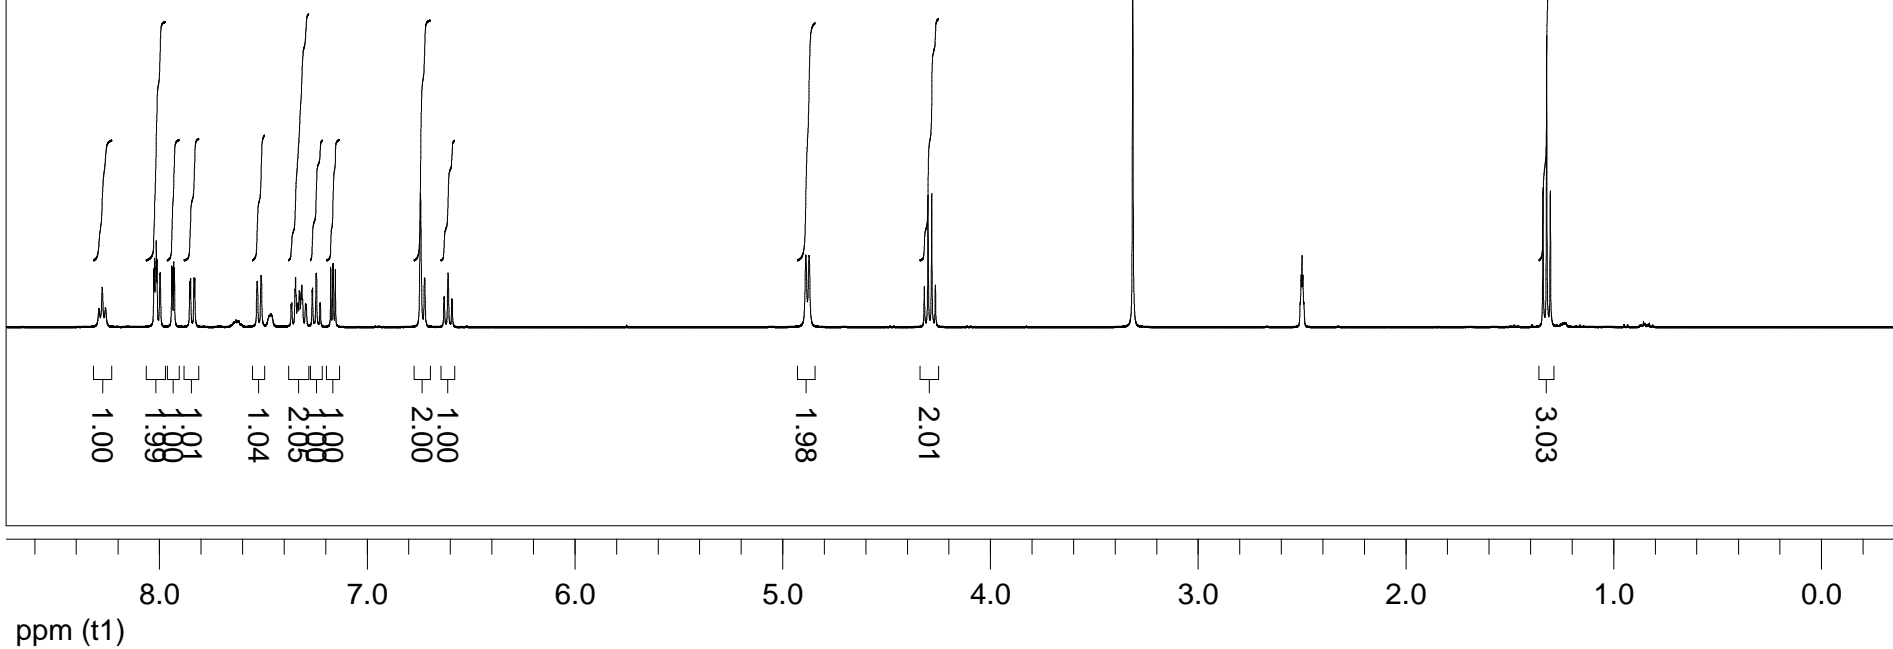

167.573  
149.806  
138.342  
136.621  
136.231  
135.947  
134.578  
134.117  
131.237  
129.240  
128.112  
124.665  
124.125  
121.121  
115.028  
114.195  
111.706  
111.109  
110.147

60.152

40.486

14.156

$^{13}\text{C}$  NMR spectrum (Varian, 100 MHz) of compound **4g** in  $\text{DMSO-}d_6$

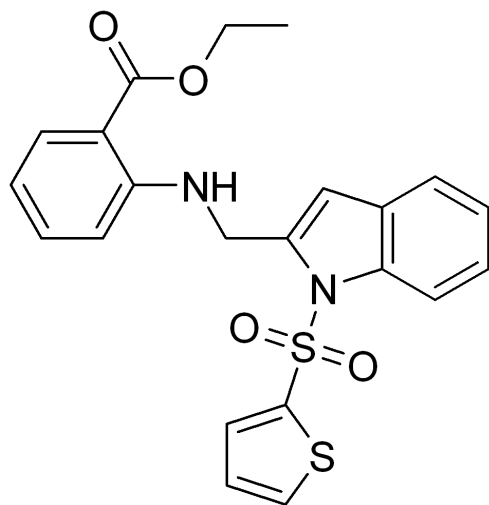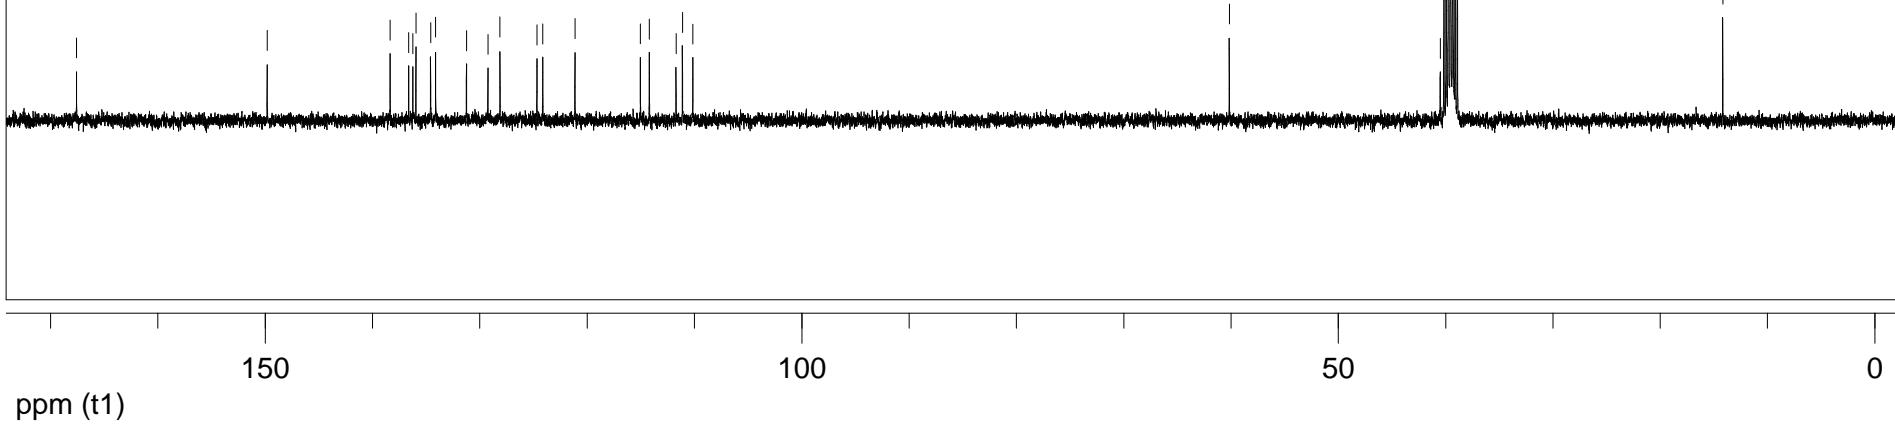

$^1\text{H}$  NMR (Varian, 400 MHz) spectrum of compound **4h** in  $\text{DMSO-}d_6$

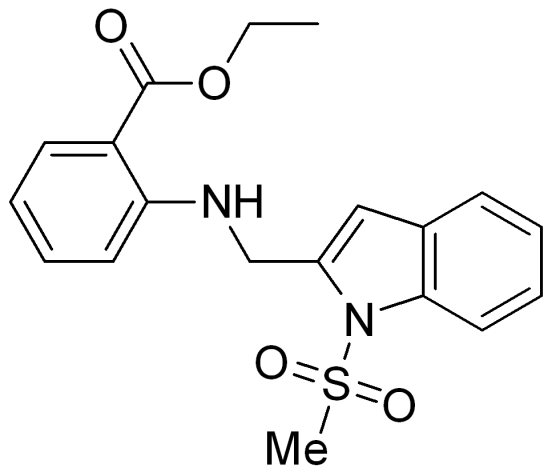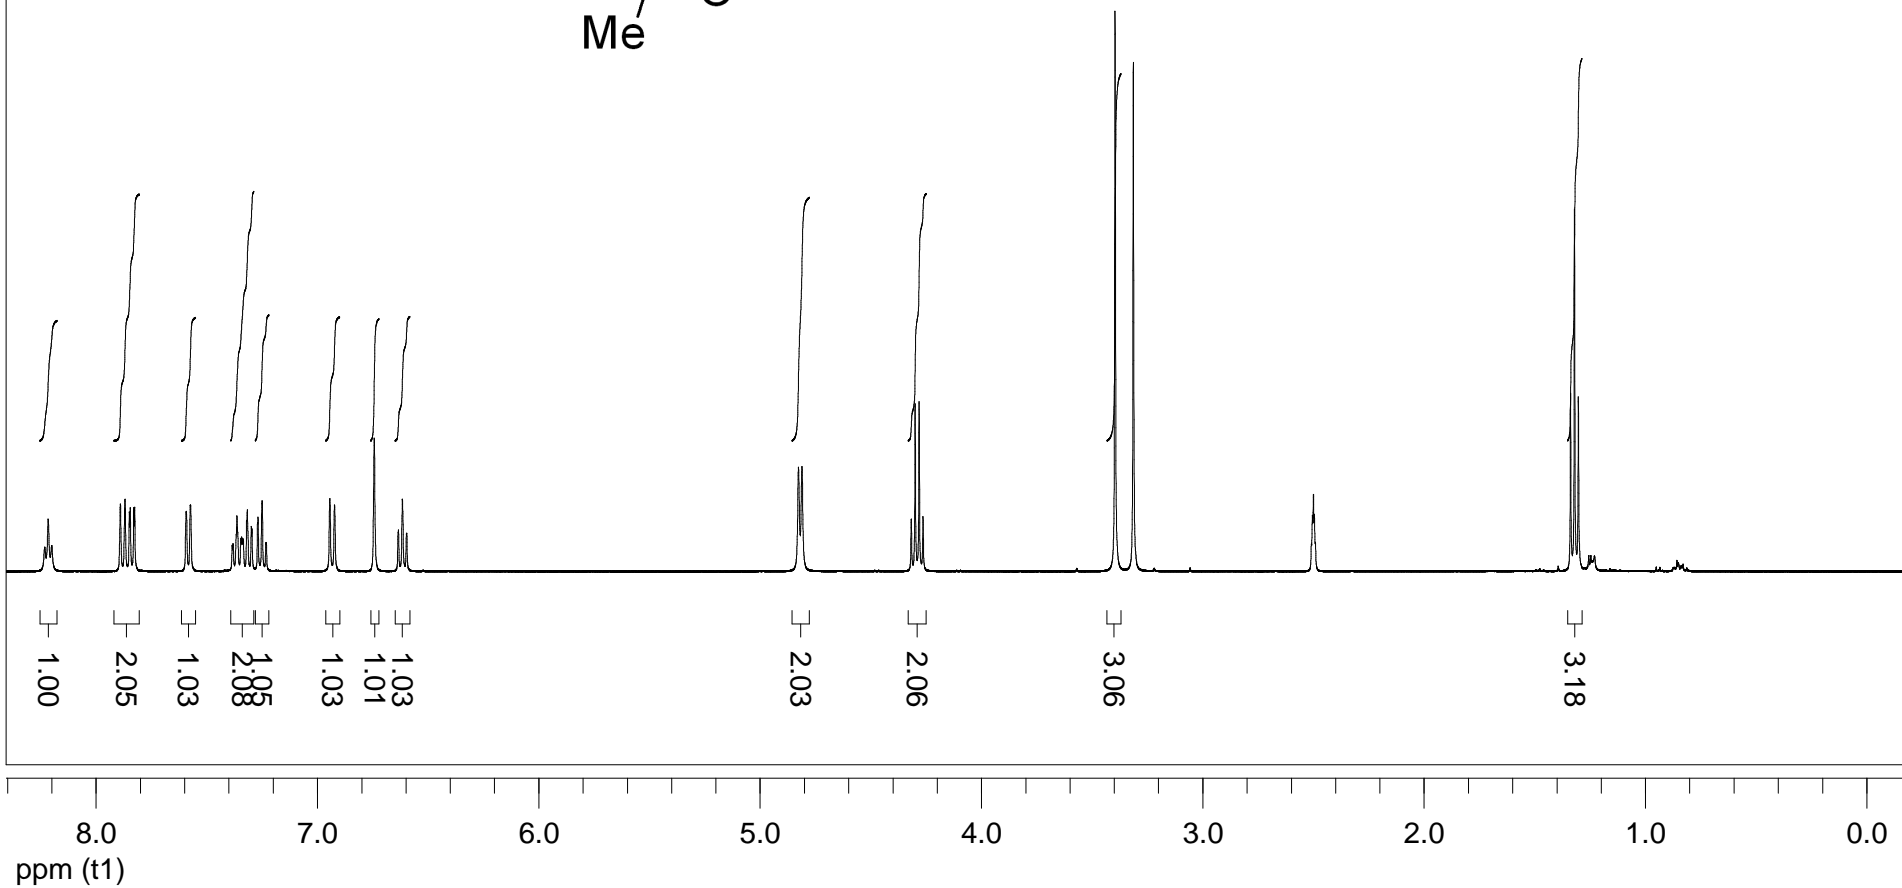

167.681  
149.909  
138.381  
136.282  
134.665  
131.213  
128.638  
124.246  
123.364  
120.870  
115.015  
113.496  
111.930  
109.950  
108.997

60.170

40.840  
40.148

14.150

$^{13}\text{C}$  NMR spectrum (Varian, 100 MHz) of compound **4h** in  $\text{DMSO-}d_6$

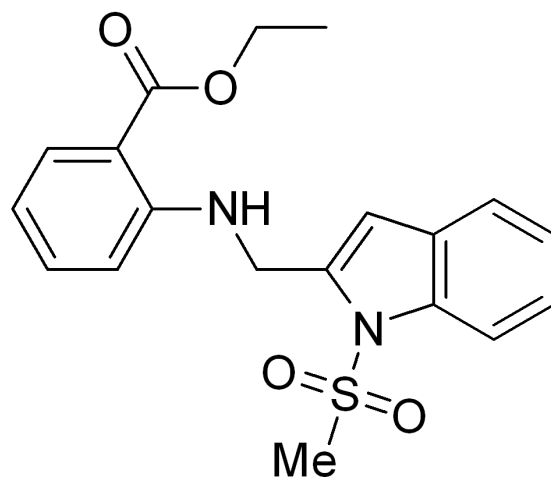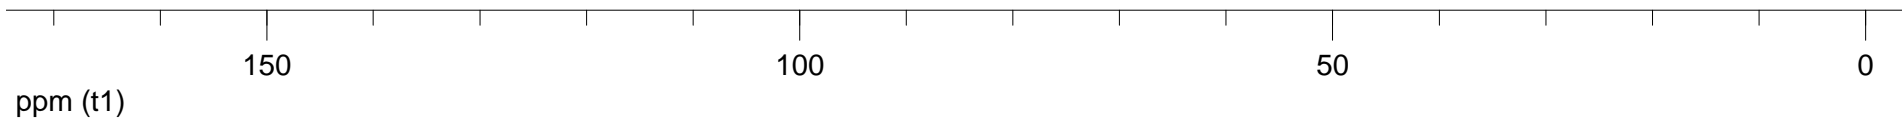



$^1\text{H}$  NMR (Varian, 400 MHz) spectrum of compound **4i** in  $\text{DMSO-}d_6$

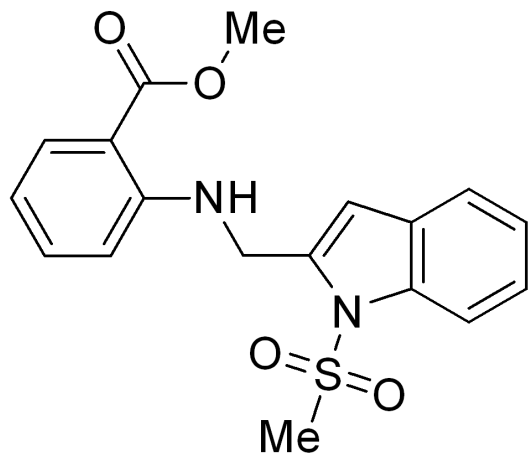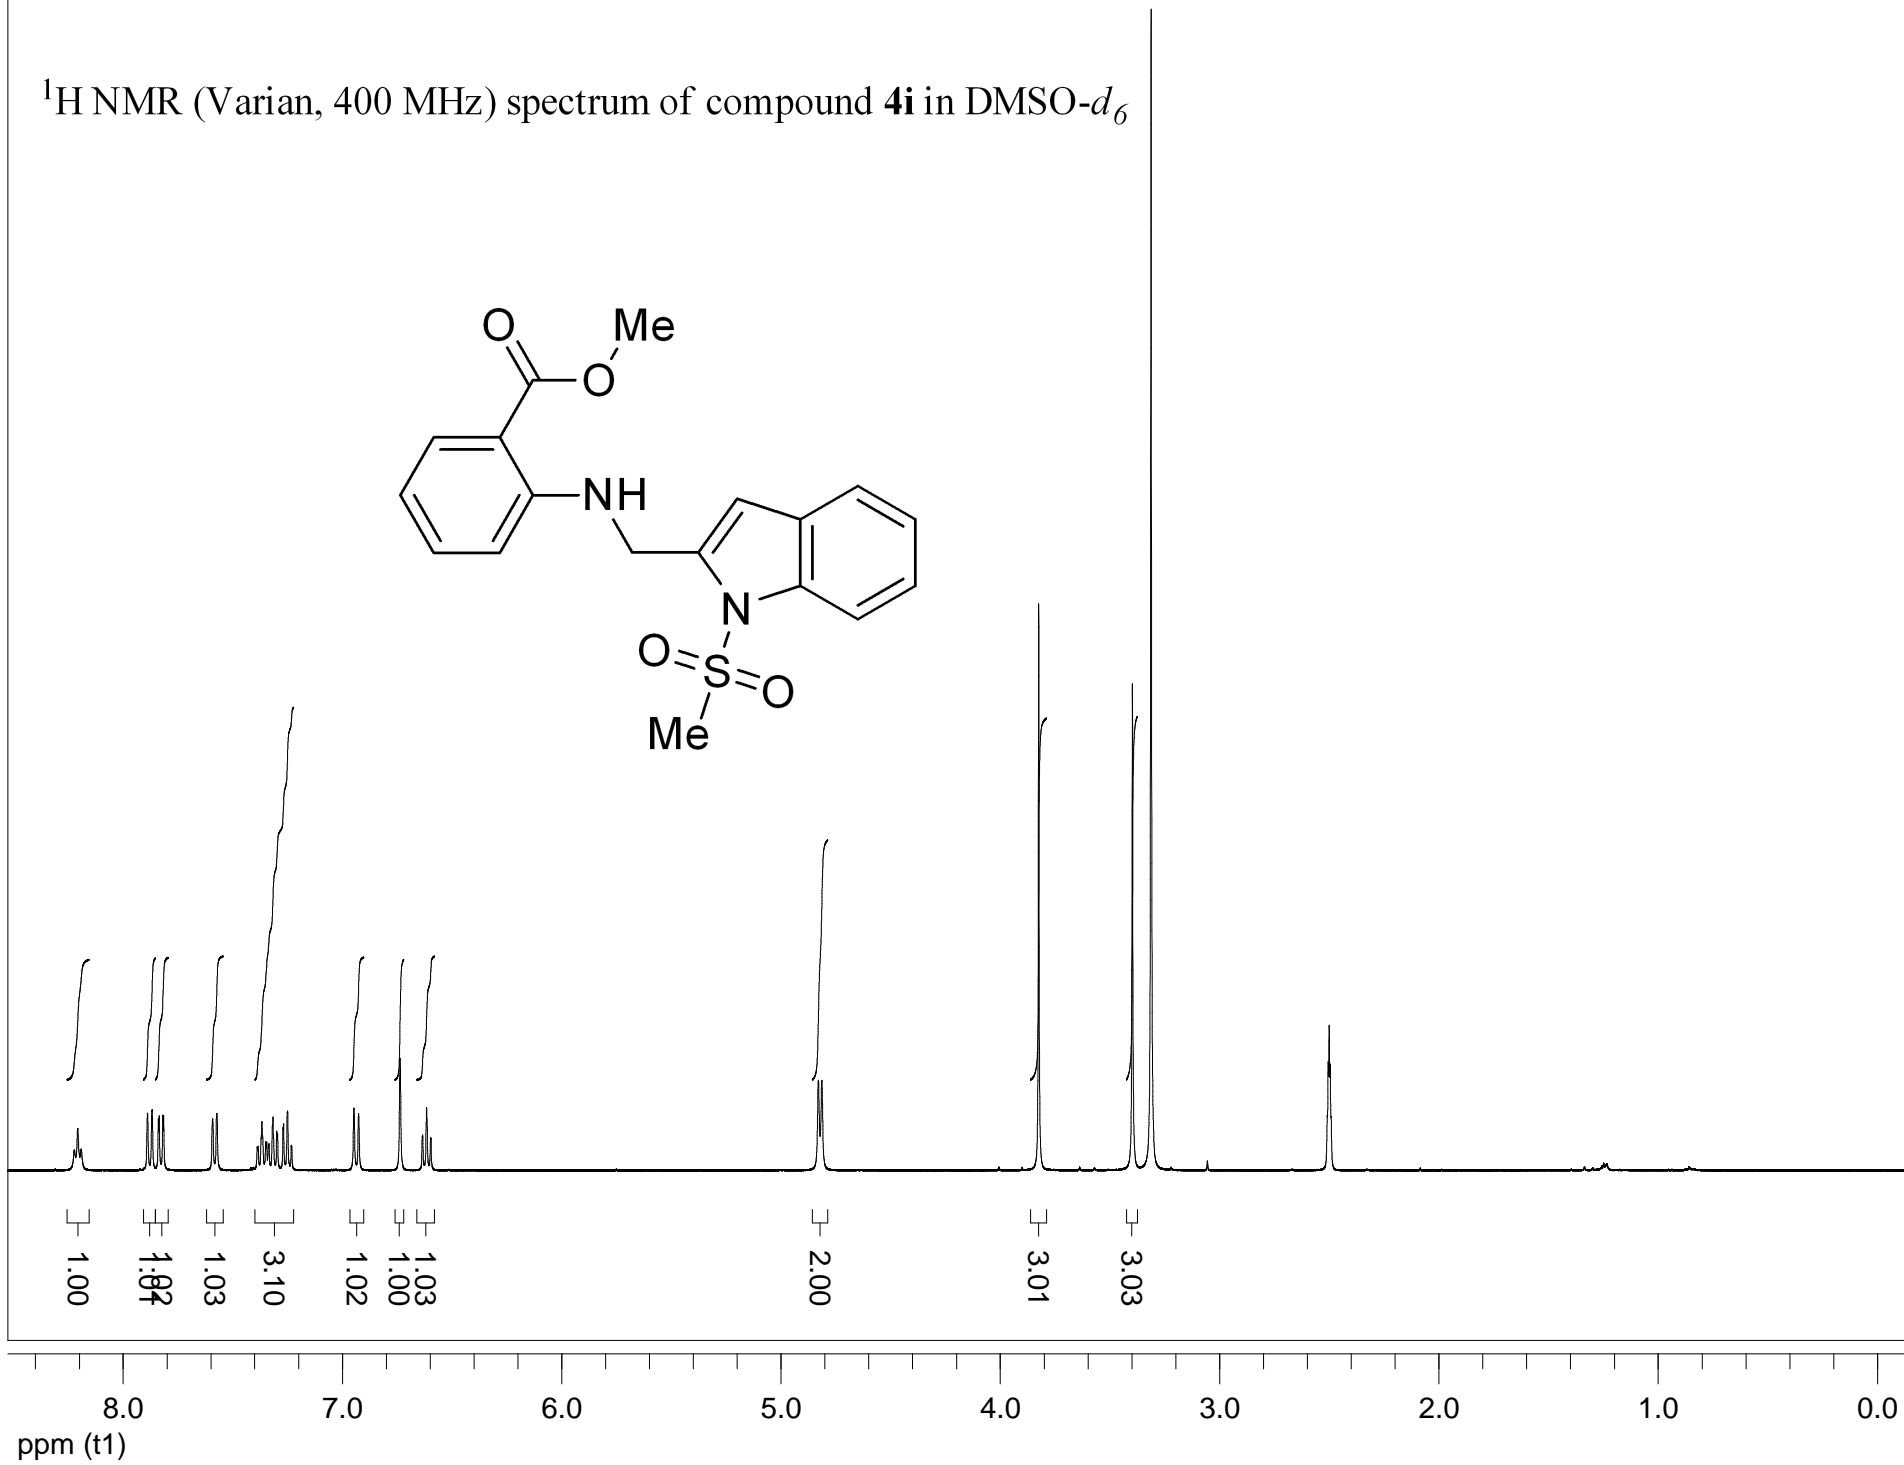

$^{13}\text{C}$  NMR spectrum (Varian, 100 MHz) of compound **4i** in  $\text{CDCl}_3$

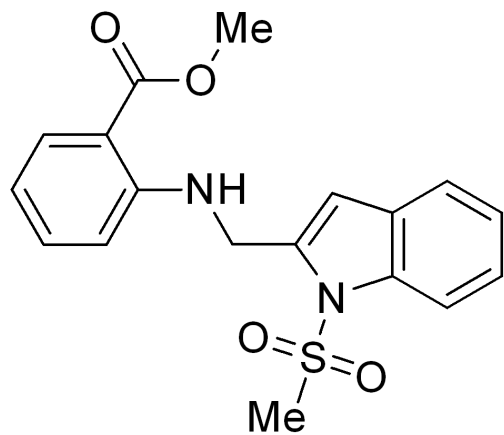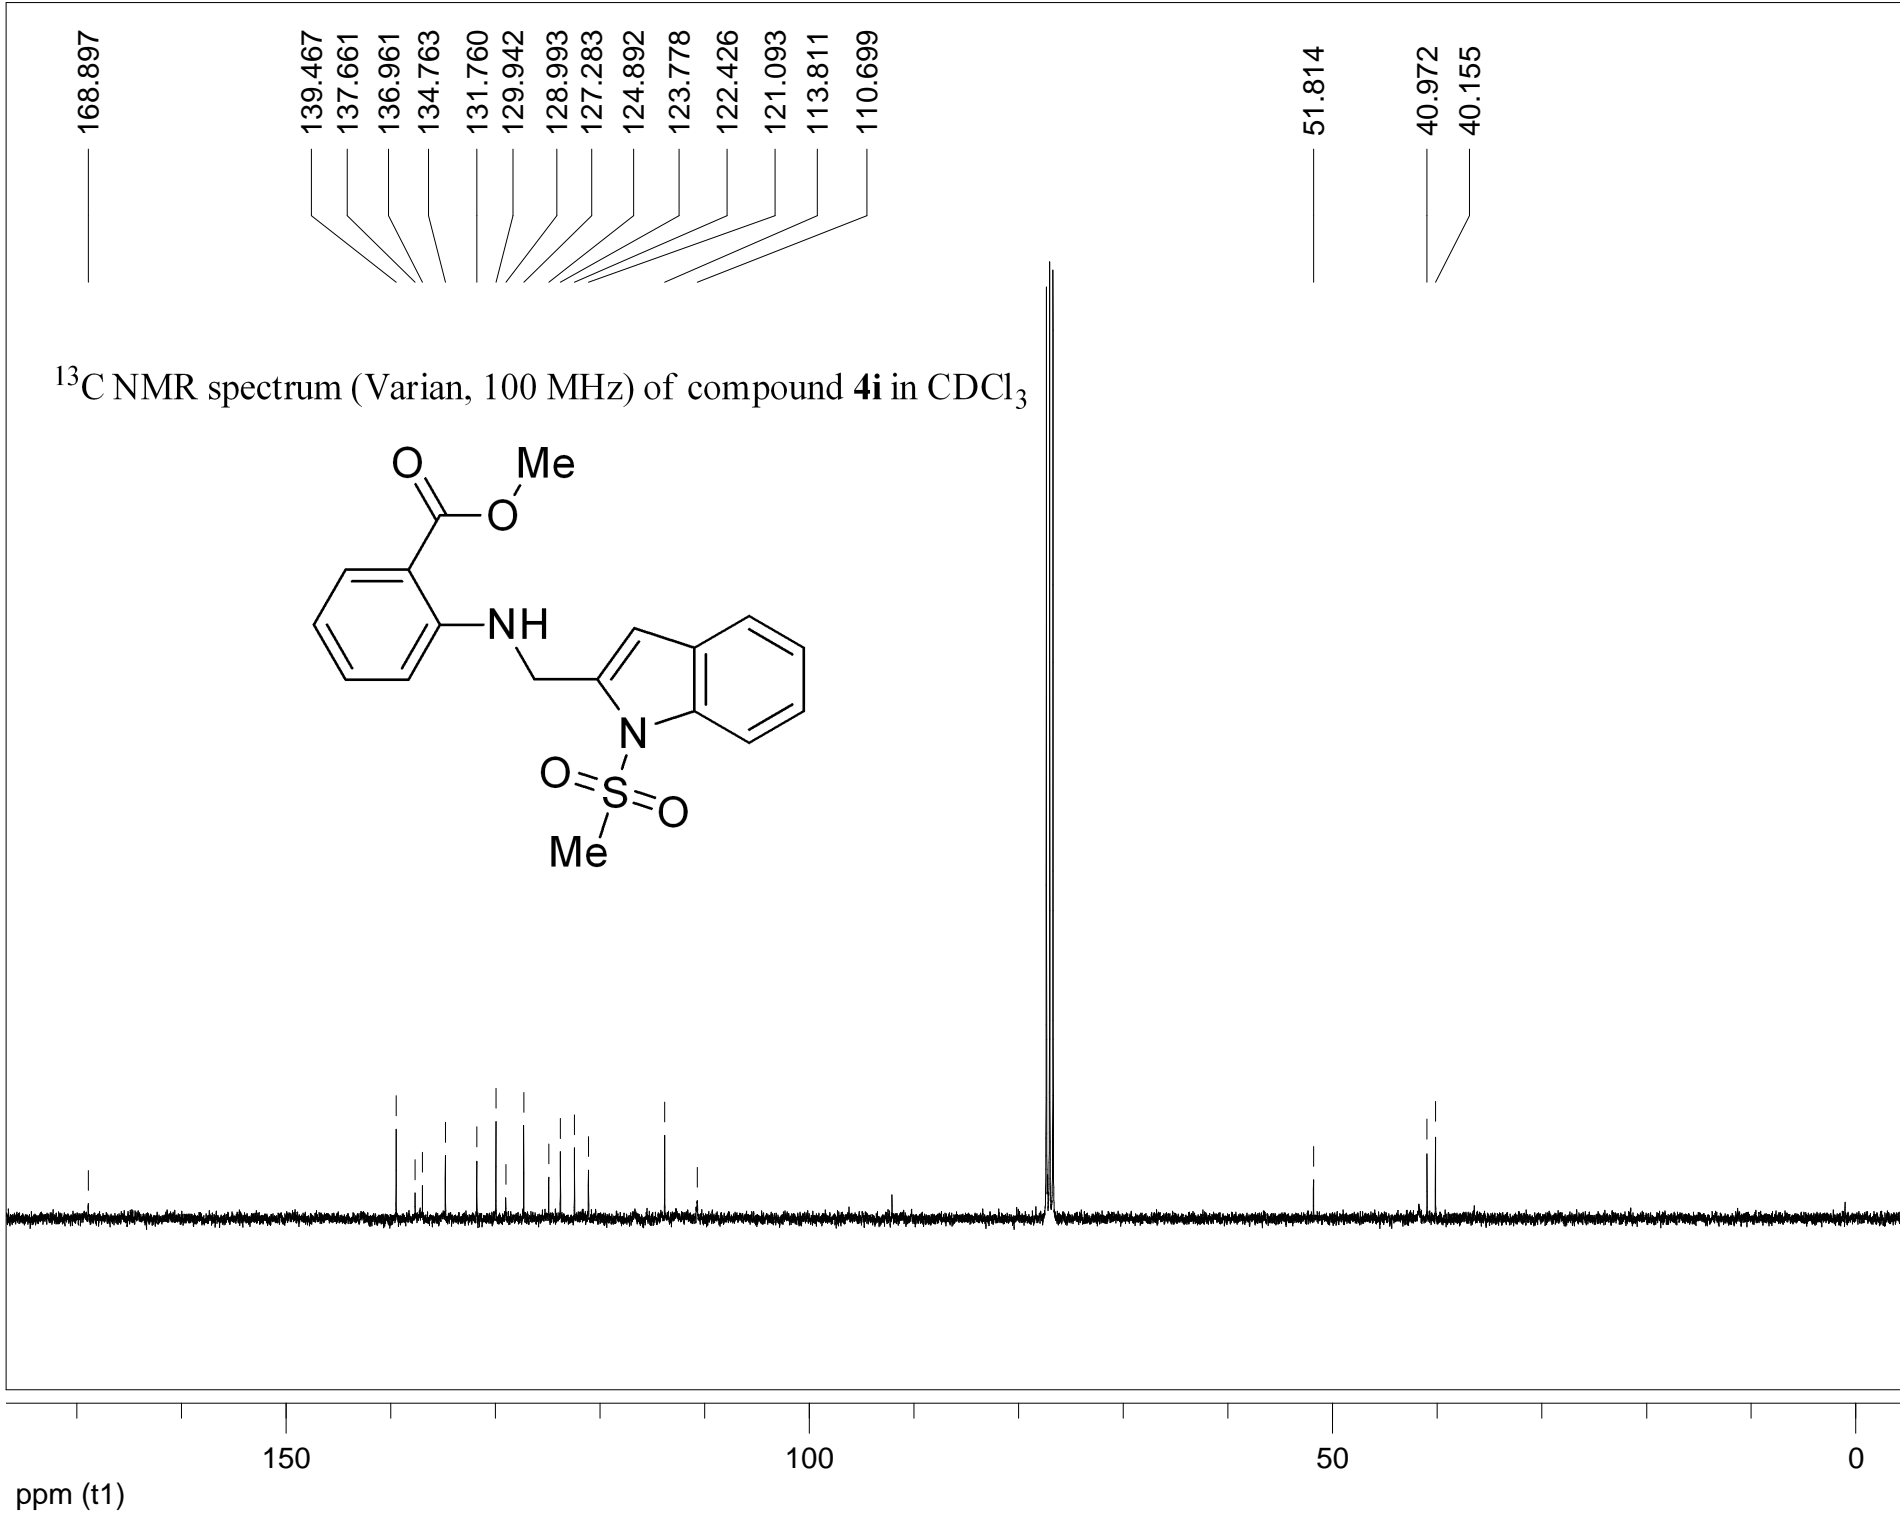

$^1\text{H}$  NMR (Varian, 400 MHz) spectrum of compound **4j** in  $\text{DMSO-}d_6$

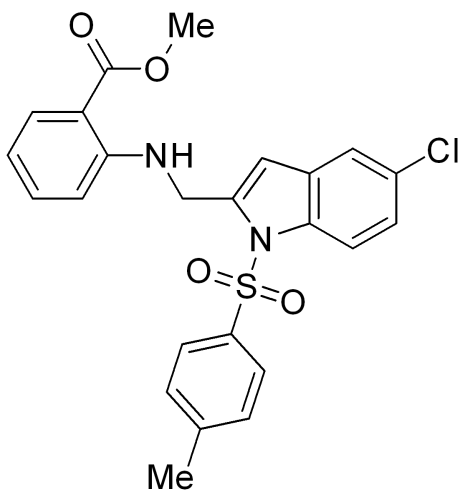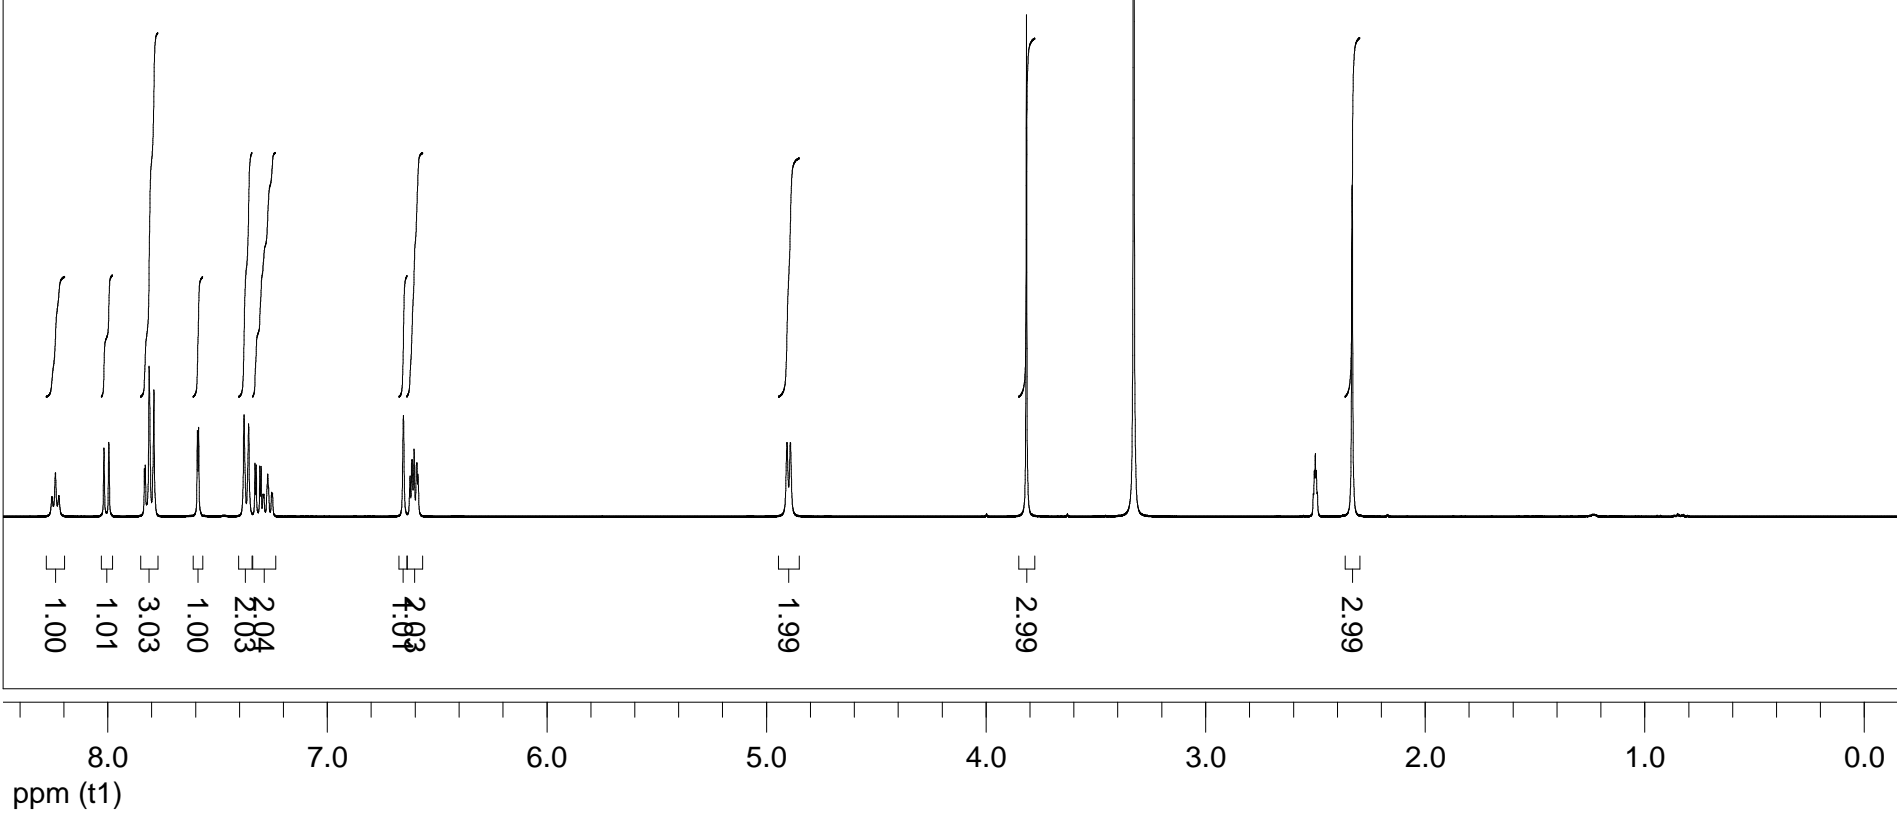

167.953  
149.662  
145.784  
140.374  
134.941  
134.615  
134.305  
131.232  
130.488  
130.315  
128.300  
126.435  
124.330  
120.409  
115.492  
115.140  
111.702  
109.942  
109.494

51.611

40.532

21.010

$^{13}\text{C}$  NMR spectrum (Varian, 100 MHz) of compound **4j** in  $\text{DMSO-}d_6$

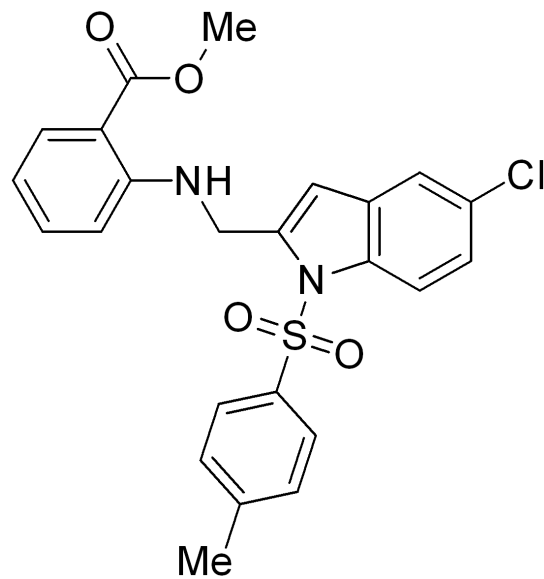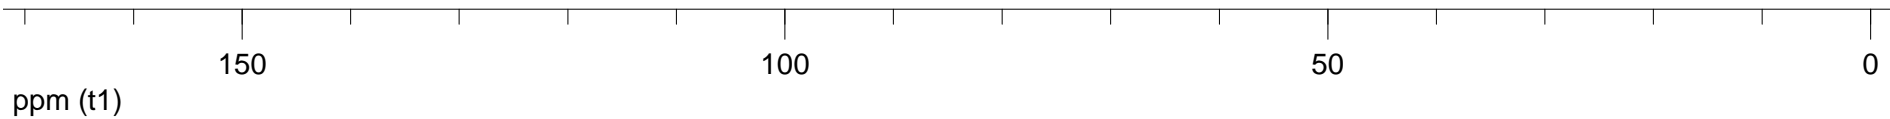

$^1\text{H}$  NMR (Varian, 400 MHz) spectrum of compound **5a** in  $\text{DMSO-}d_6$

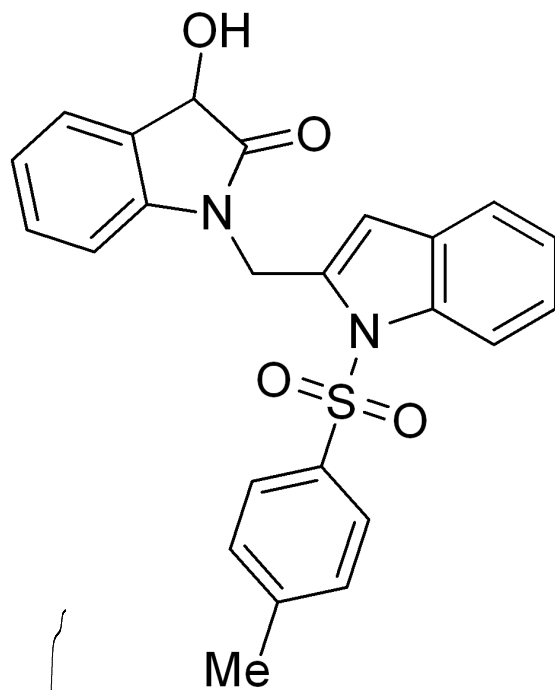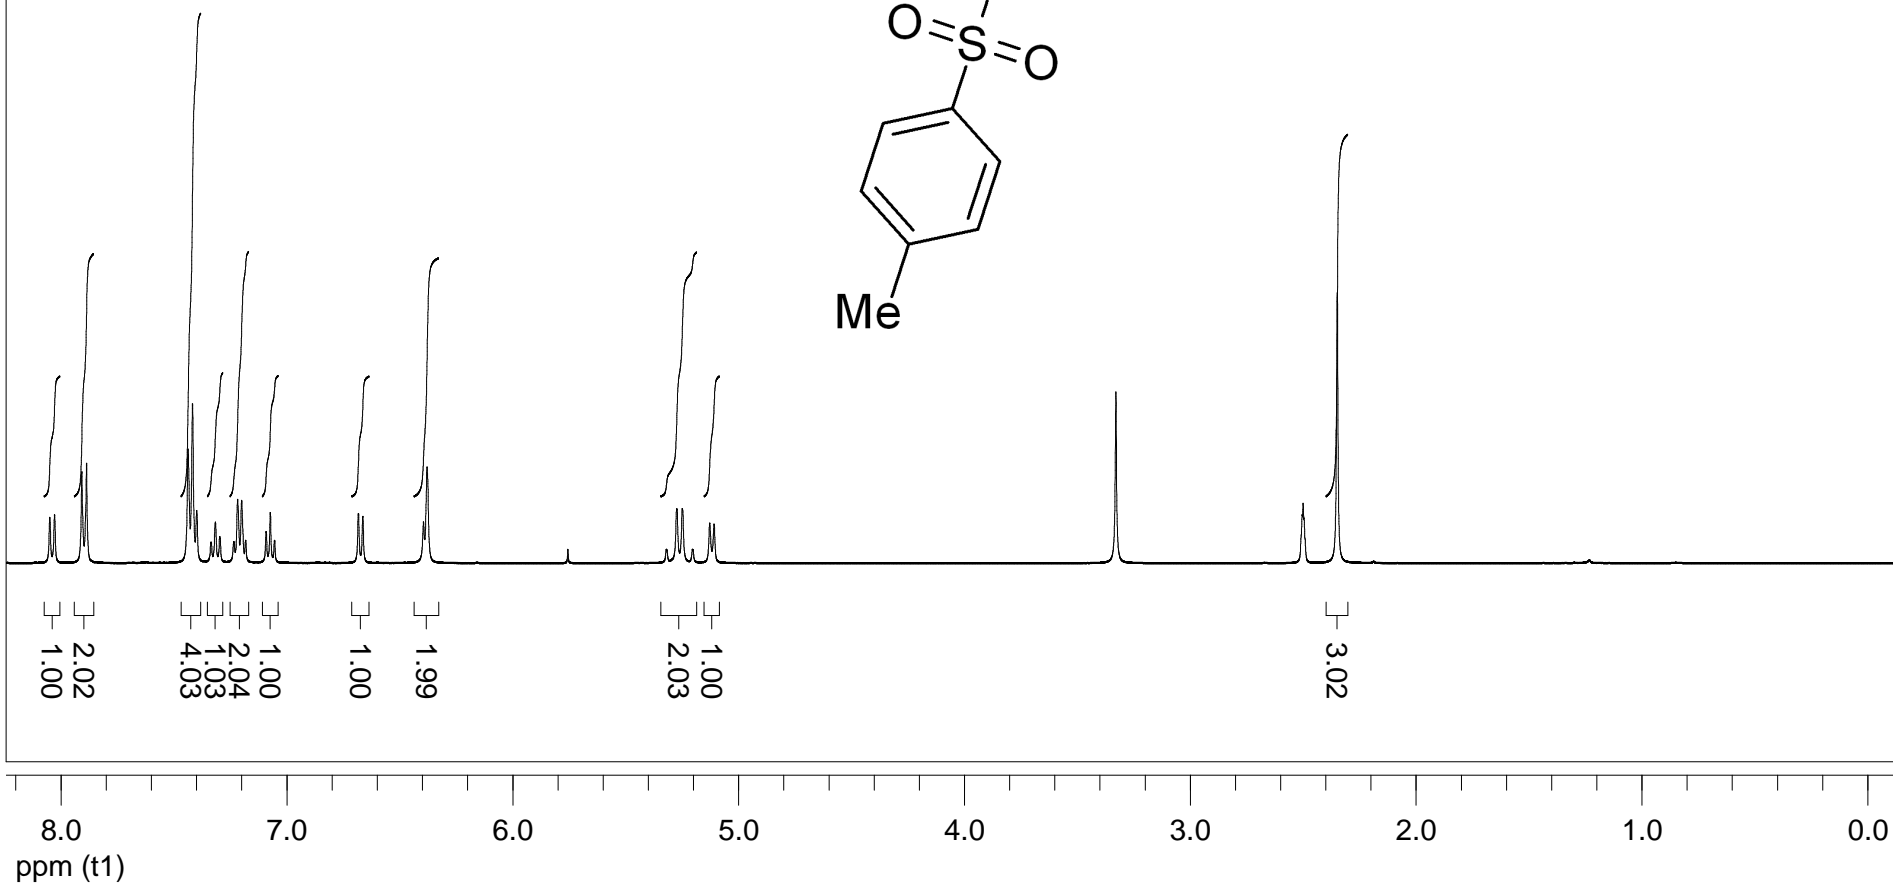

176.186

145.828

142.277

136.394

135.163

134.270

130.397

129.083

128.916

128.717

126.457

124.773

124.664

123.955

122.569

120.841

113.985

108.888

108.855

68.826

38.166

21.038

$^{13}\text{C}$  NMR spectrum (Varian, 100 MHz) of compound **5a** in  $\text{DMSO-}d_6$

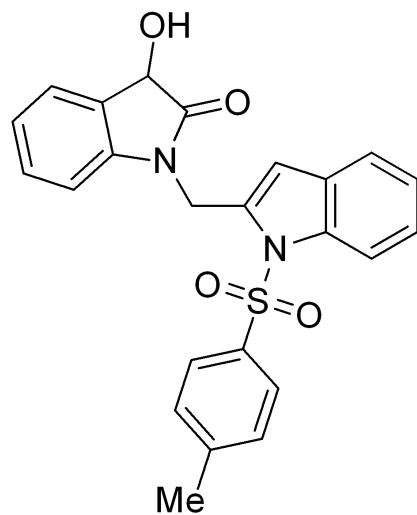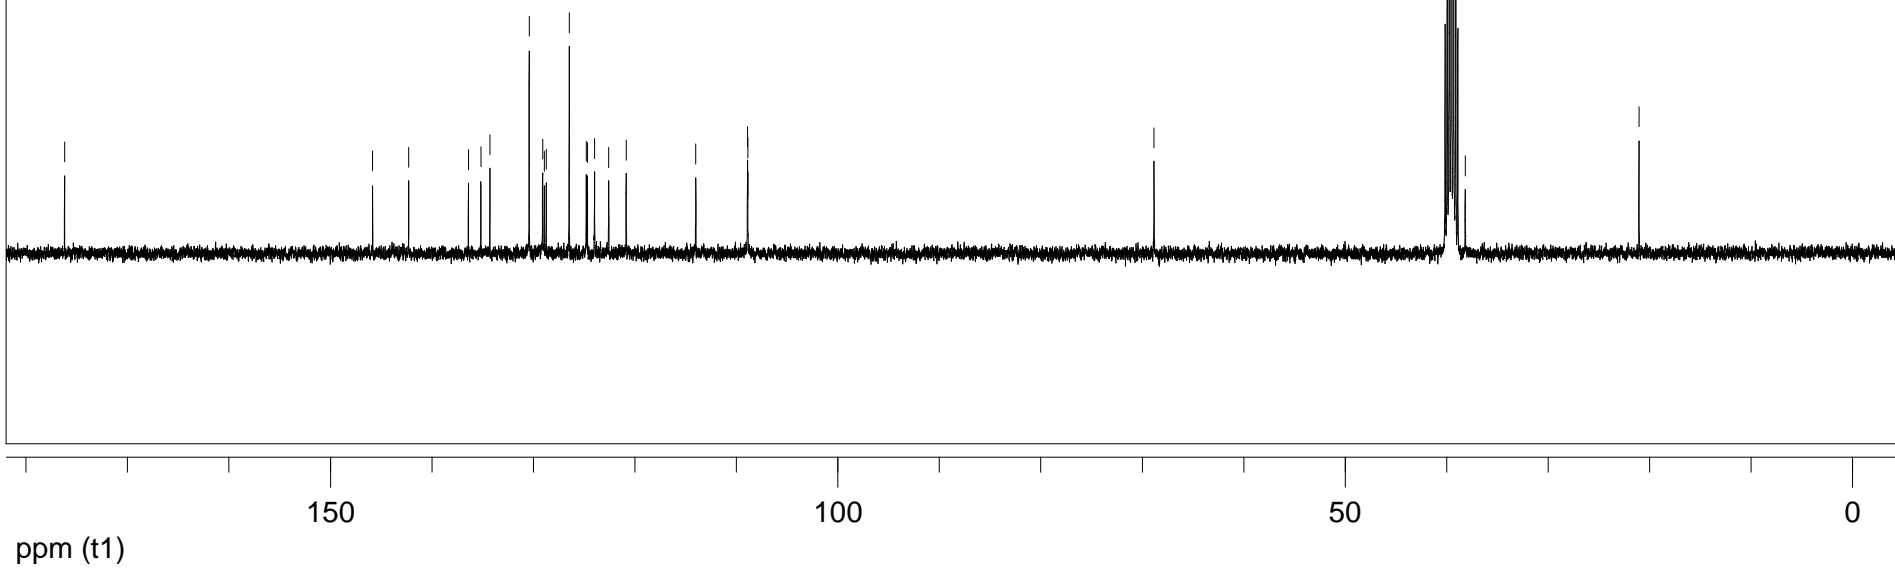

$^1\text{H}$  NMR (Varian, 400 MHz) spectrum of compound **5b** in  $\text{DMSO-}d_6$

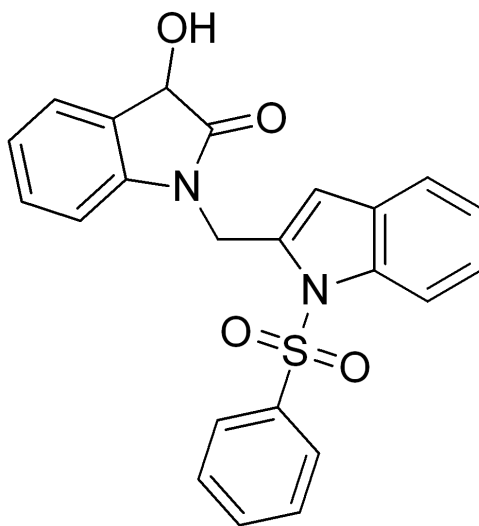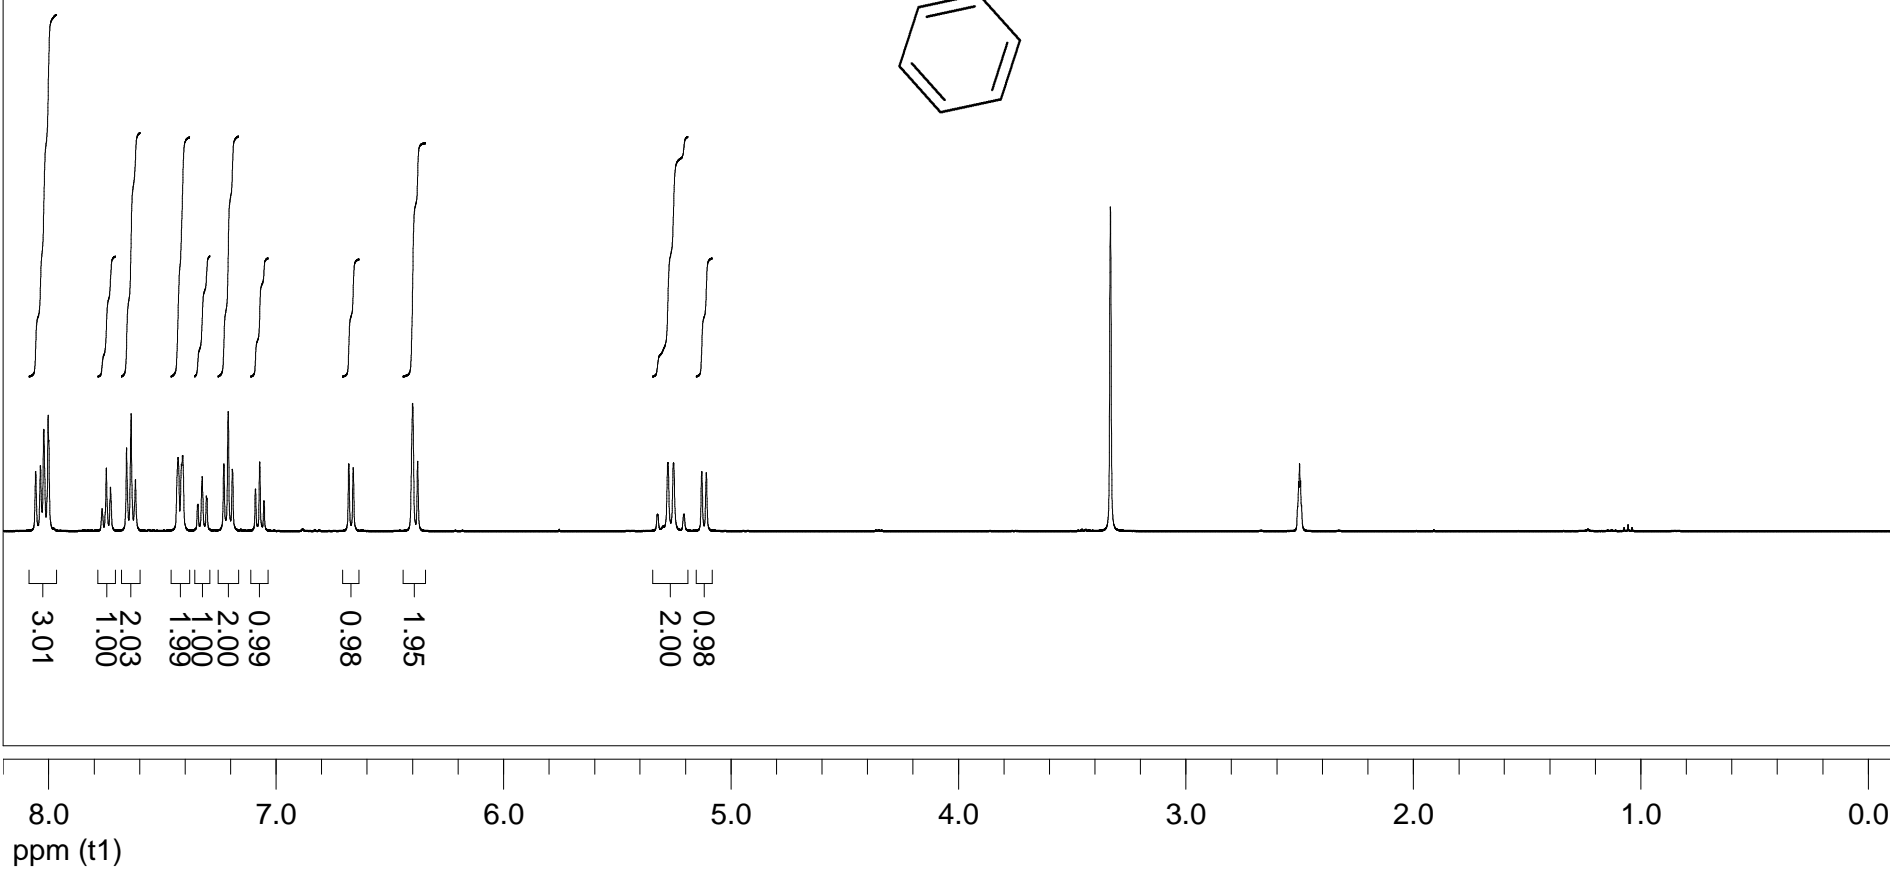

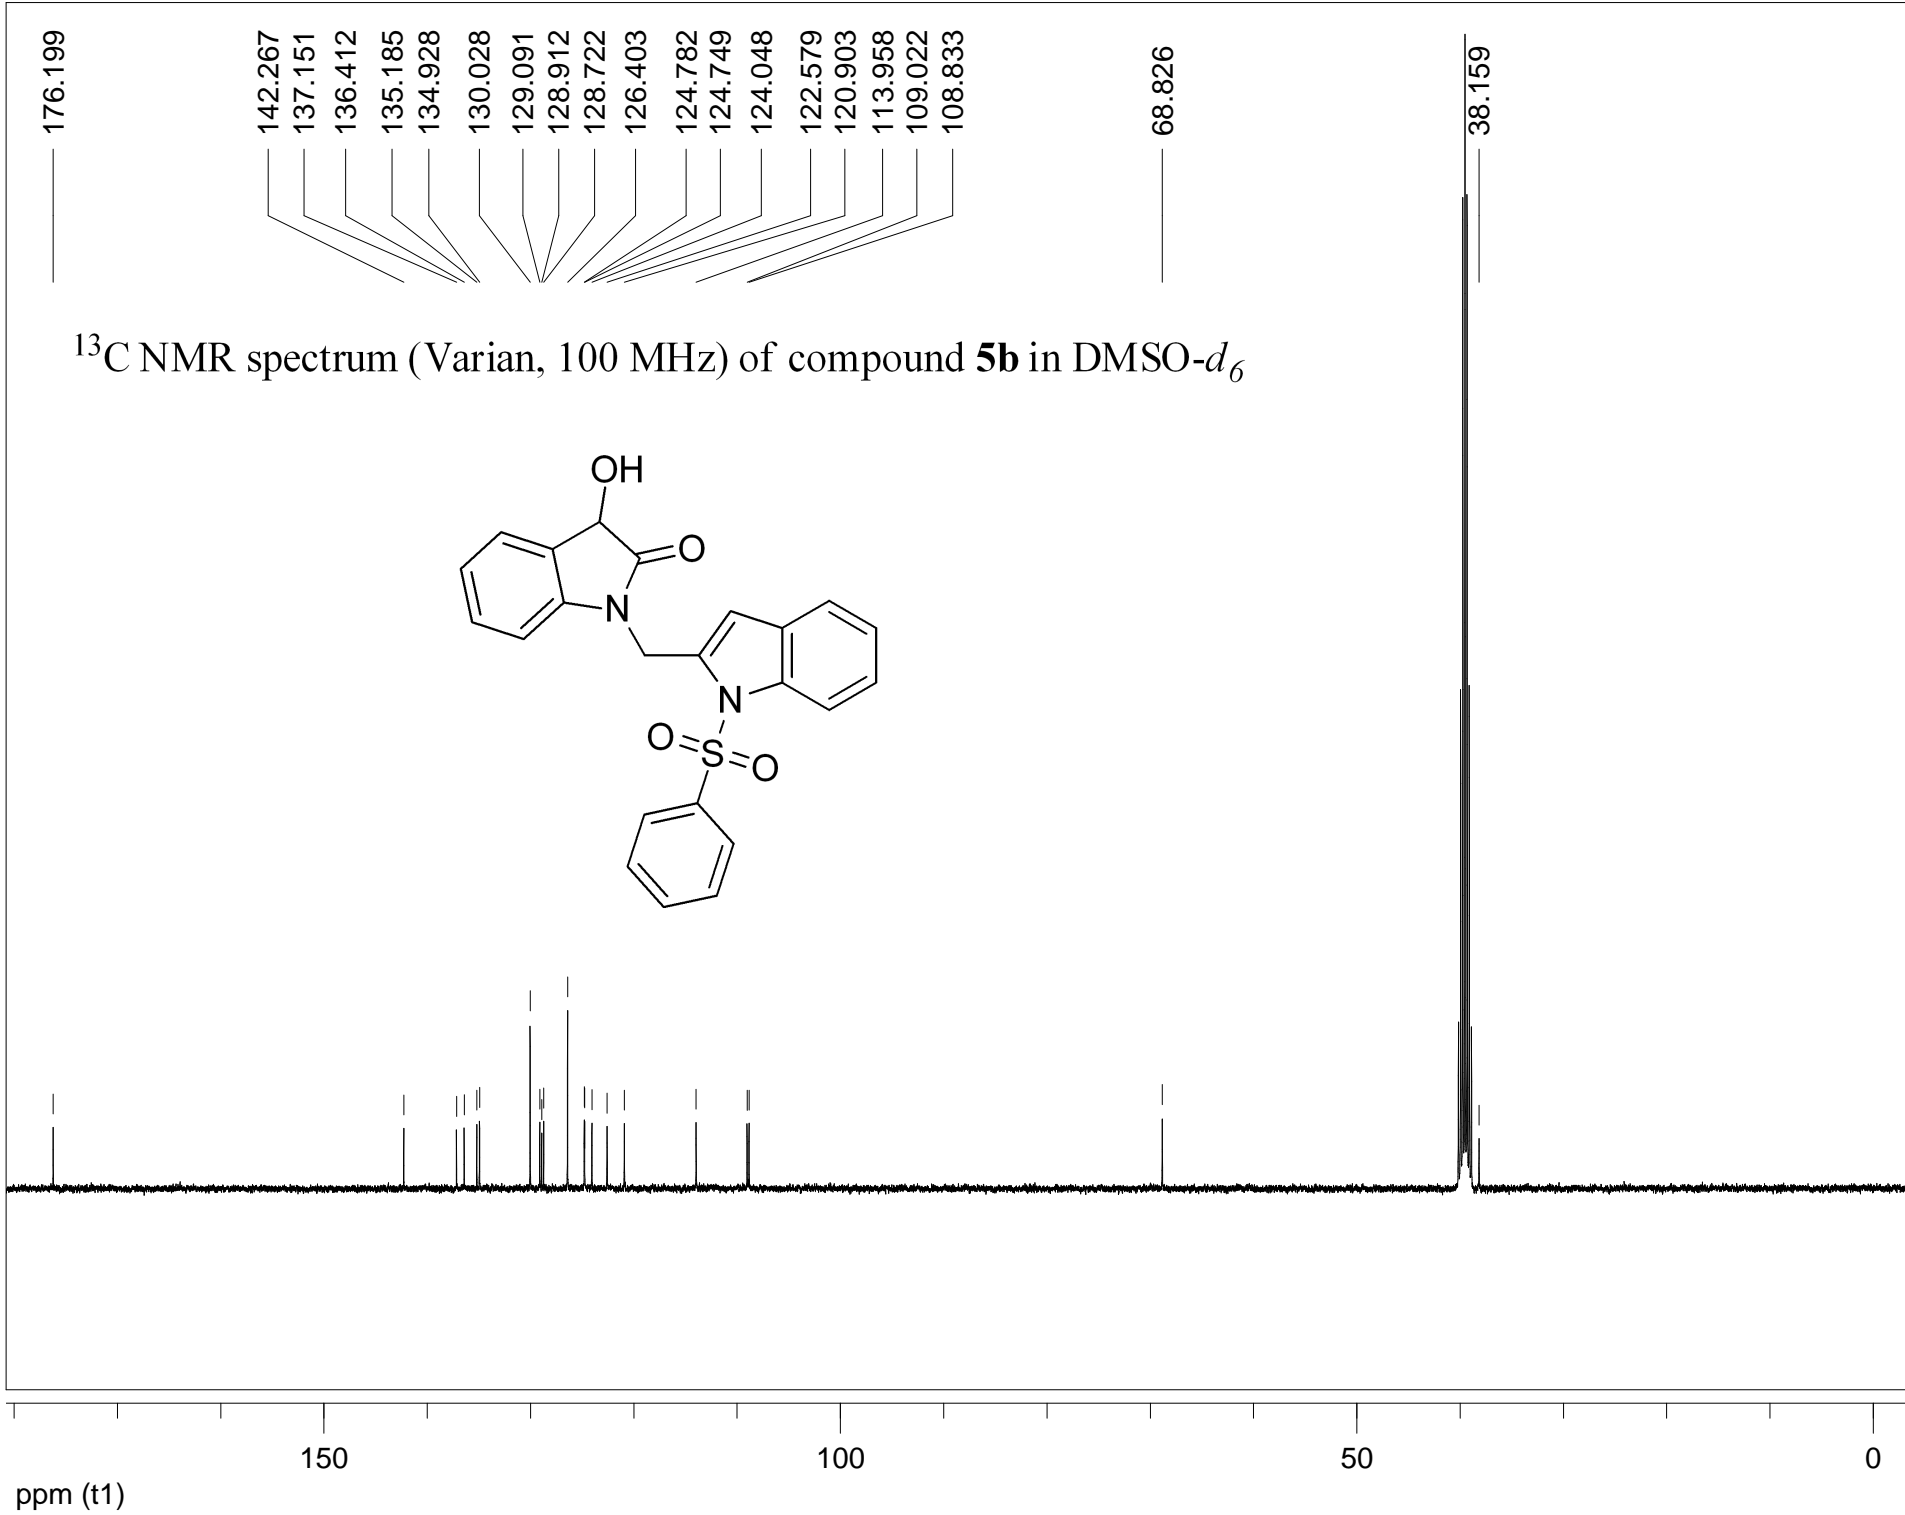



D<sub>2</sub>O exchange spectrum of compound **5b** in DMSO-*d*<sub>6</sub>

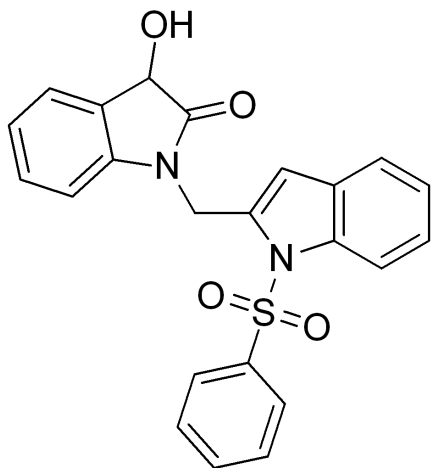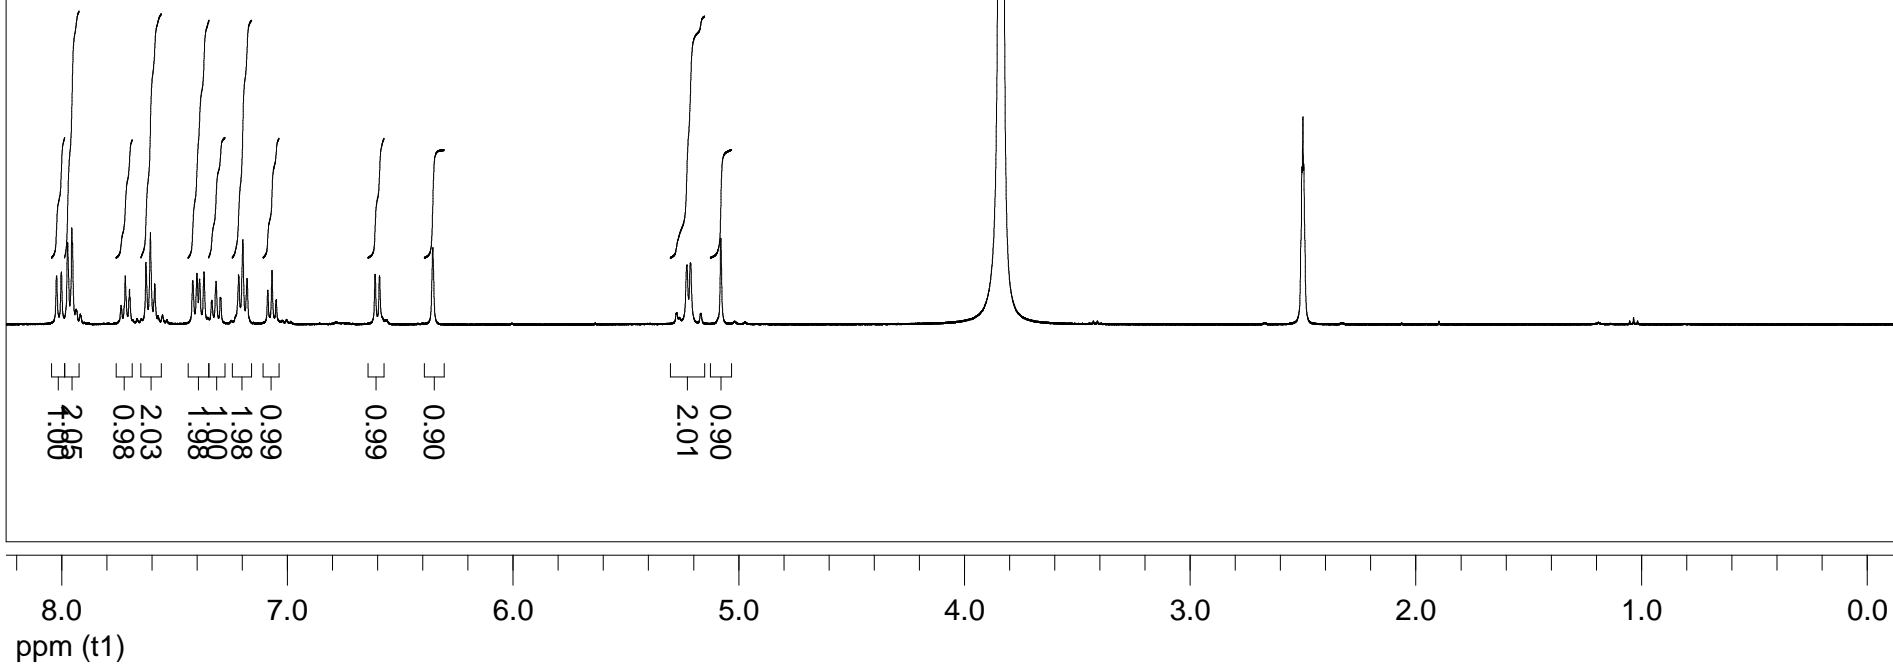

$^1\text{H}$  NMR (Varian, 400 MHz) spectrum of compound **5c** in  $\text{DMSO-}d_6$

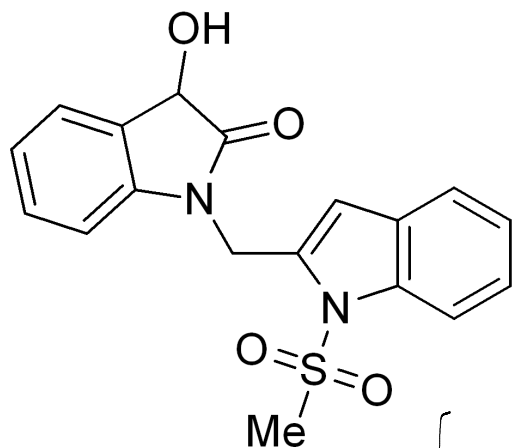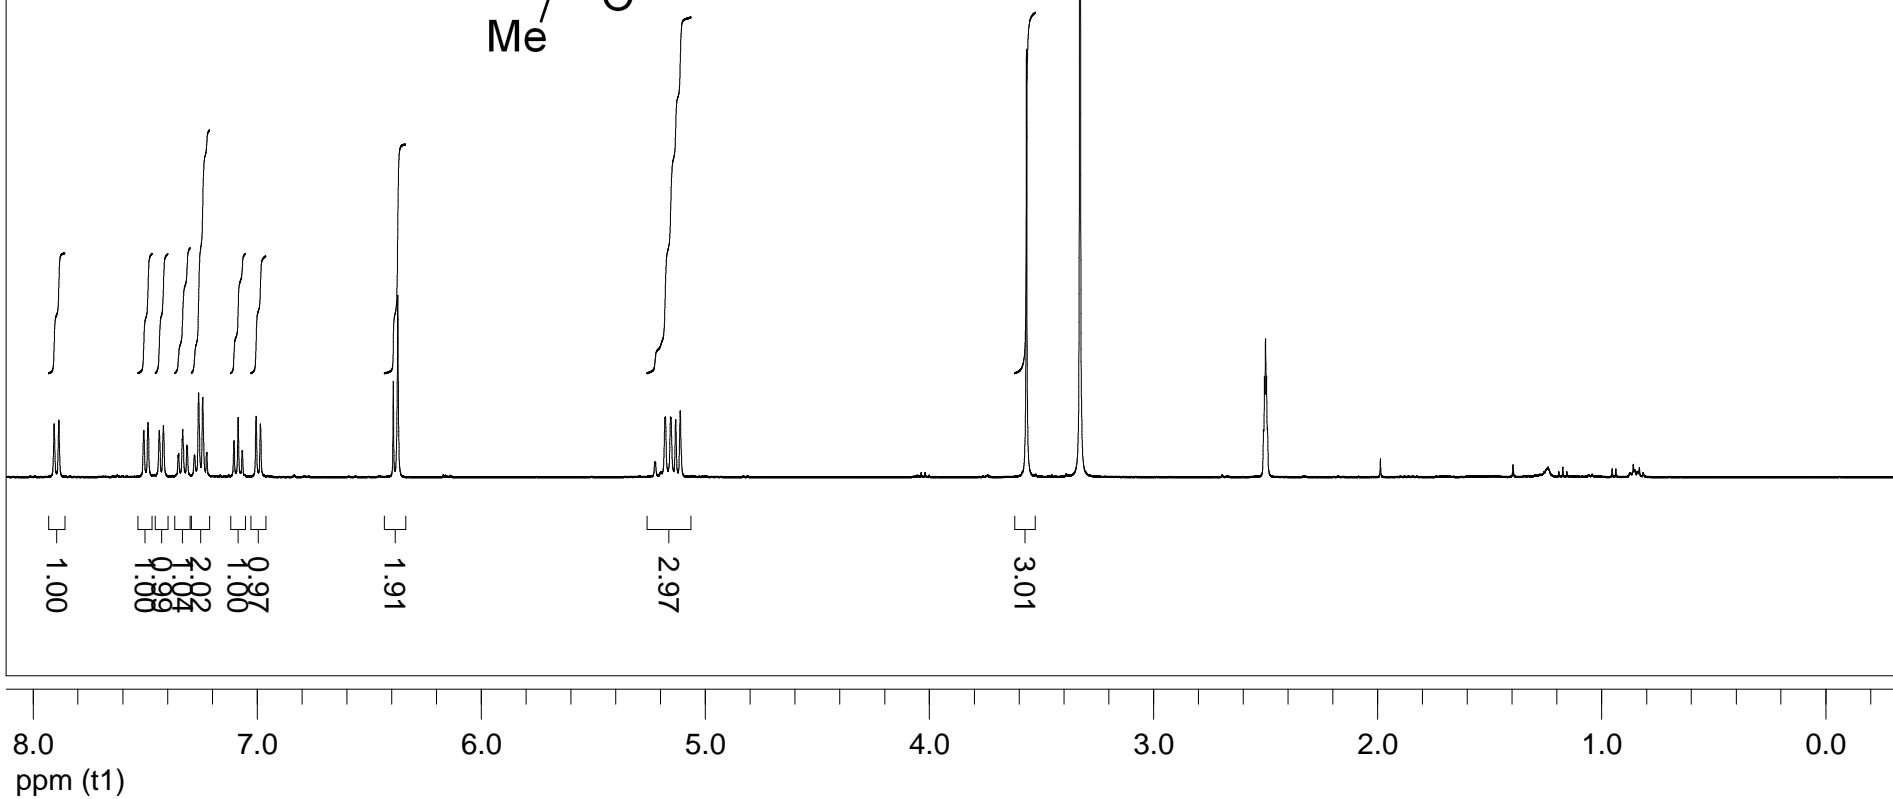

176.227

142.436

136.312

135.254

129.086

128.686

128.546

124.712

124.310

123.491

122.581

120.729

113.436

109.318

107.004

68.865

41.088

37.784

$^{13}\text{C}$  NMR spectrum (Varian, 100 MHz) of compound **5c** in  $\text{DMSO-}d_6$

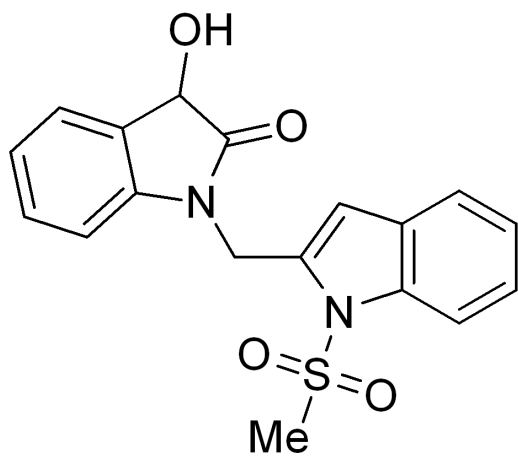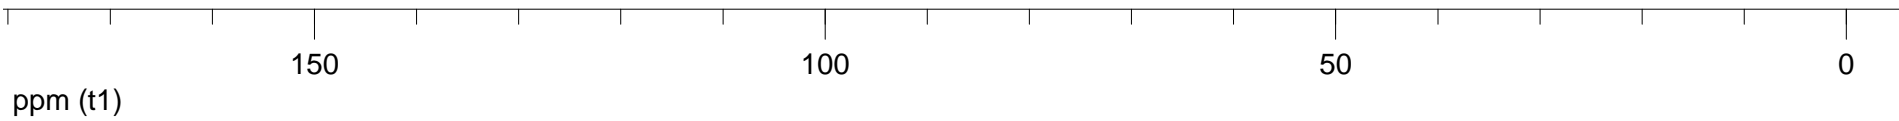

D<sub>2</sub>O exchange spectrum of compound **5c** in DMSO-*d*<sub>6</sub>

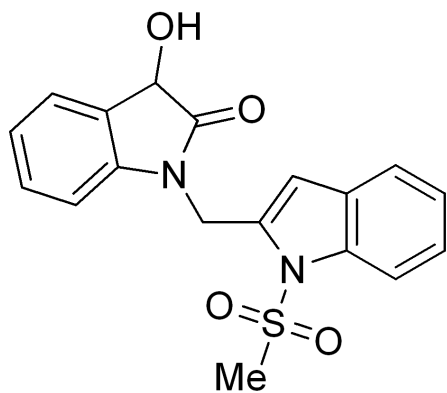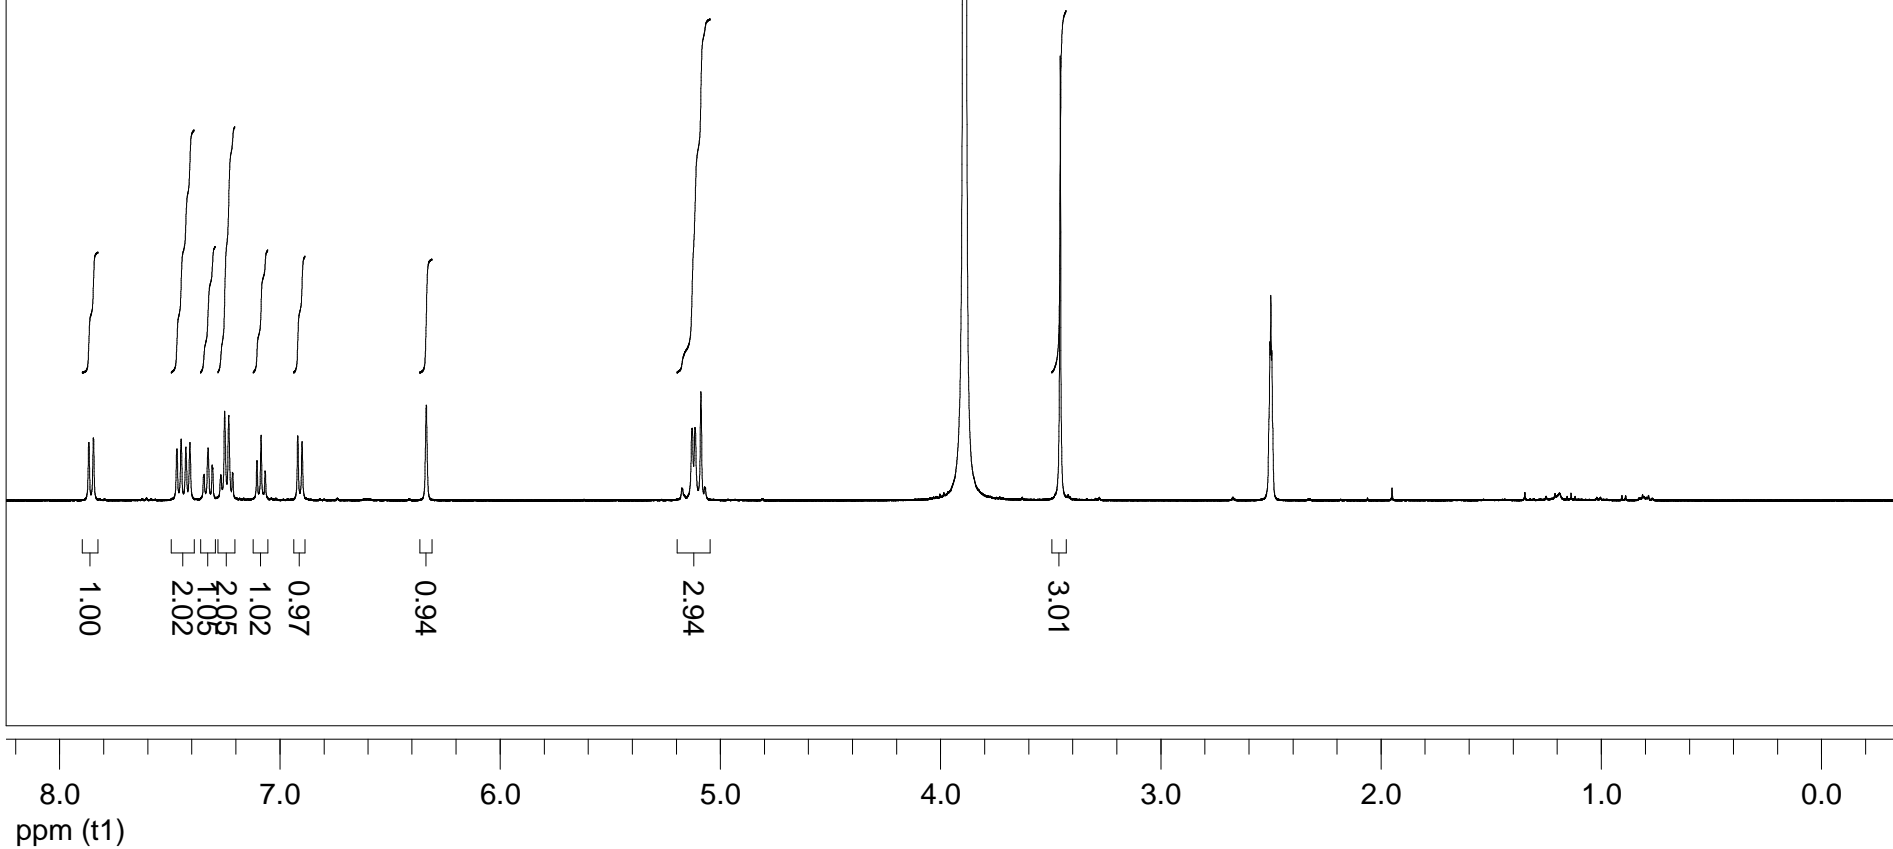

129.083  
124.709  
124.307  
123.487  
122.578  
120.726  
113.432  
109.314  
106.999

68.861

41.085  
37.780

DEPT spectrum of compound **5c** in DMSO-*d*<sub>6</sub>

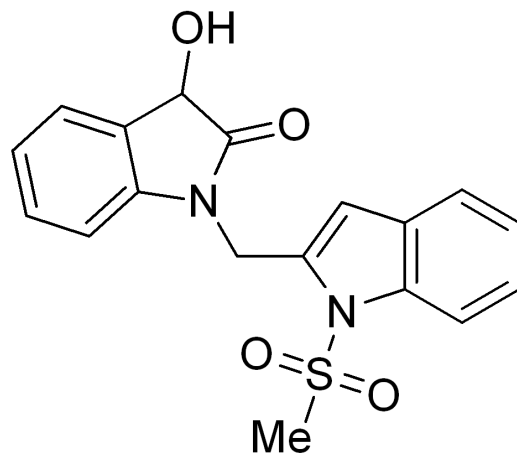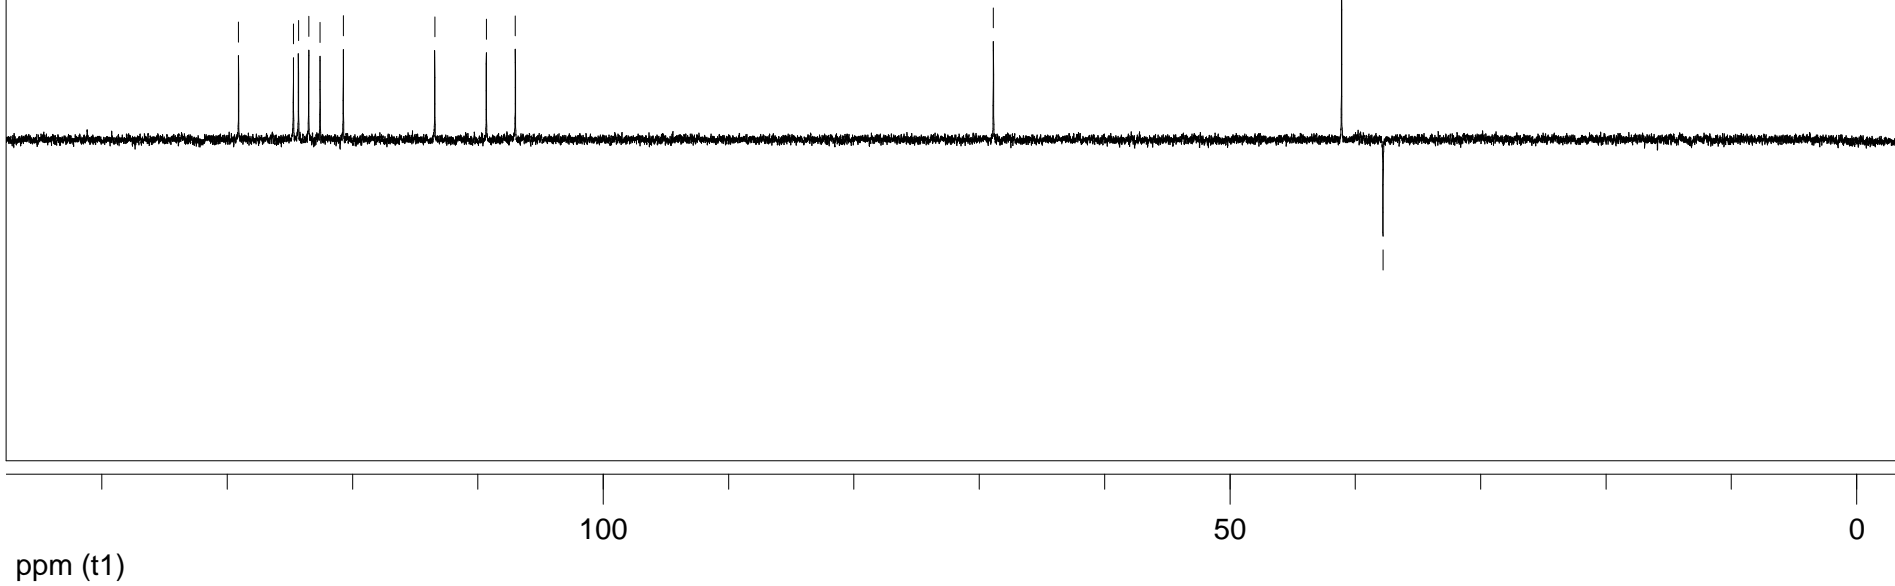

$^1\text{H}$  NMR (Varian, 400 MHz) spectrum of compound **5d** in  $\text{DMSO-}d_6$

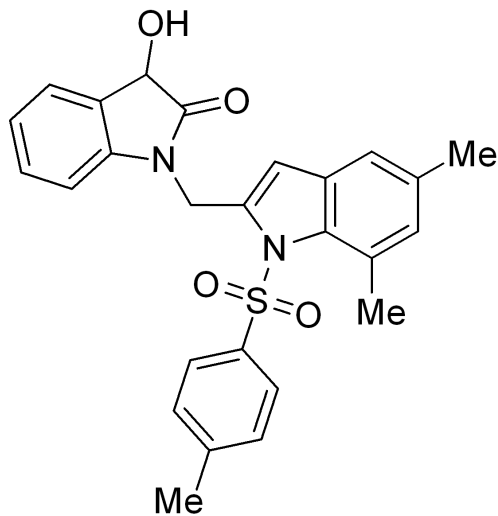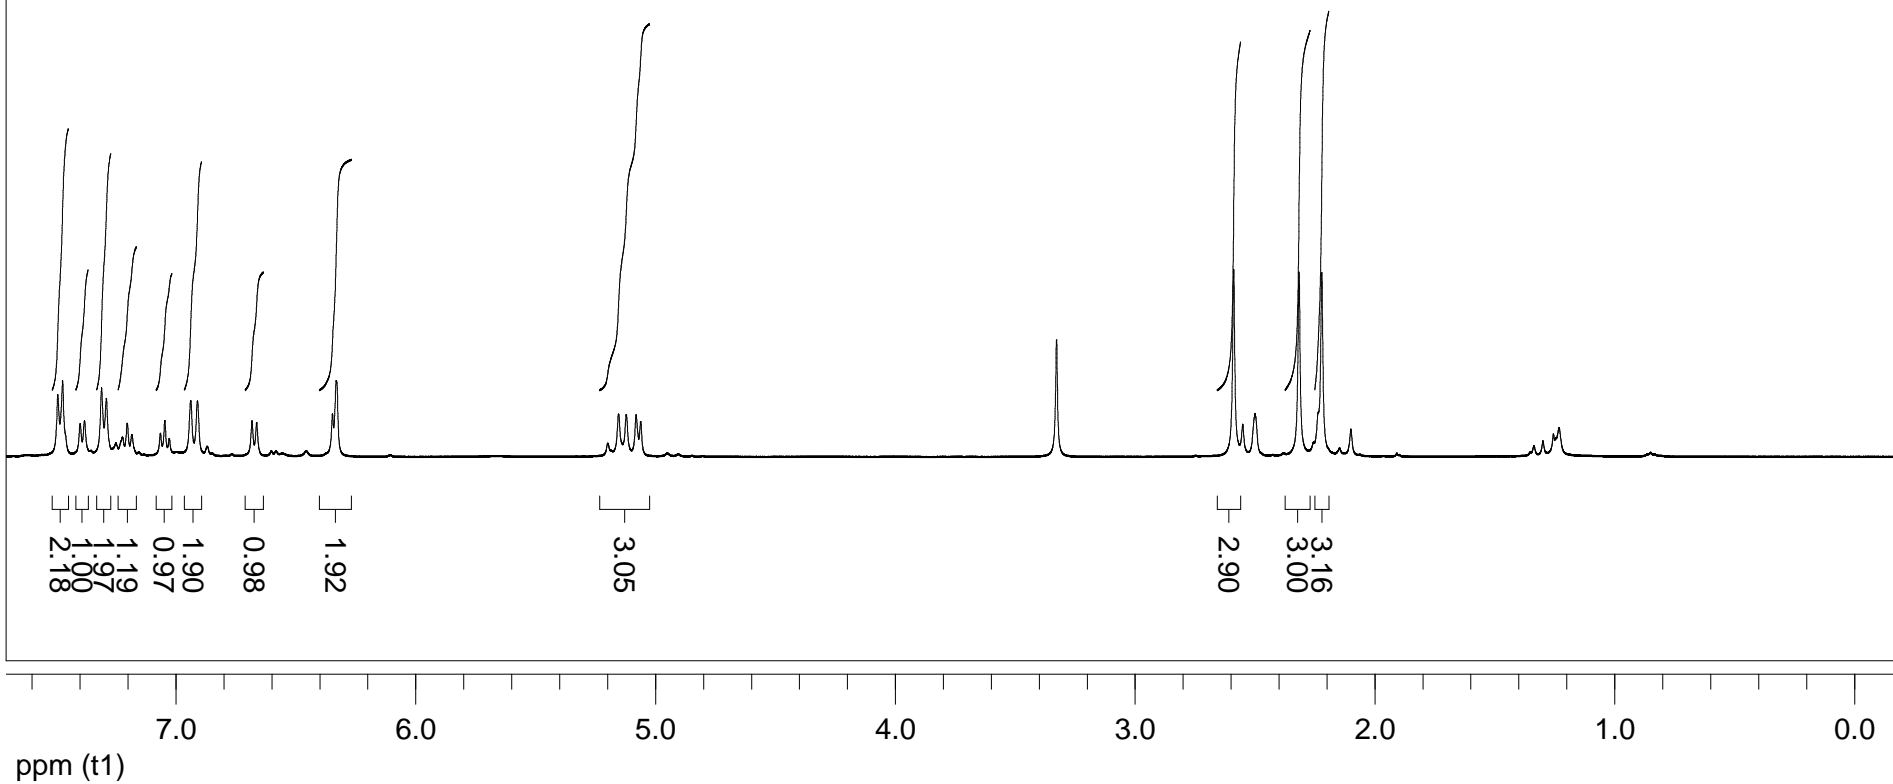

176.170  
145.043  
142.214  
138.480  
136.880  
134.459  
133.005  
132.837  
129.949  
129.703  
129.052  
128.683  
127.260  
126.268  
124.685  
122.472  
118.750  
114.376  
108.871

68.812

21.575  
20.985  
20.449

$^{13}\text{C}$  NMR spectrum (Varian, 100 MHz) of compound **5d** in  $\text{DMSO-}d_6$

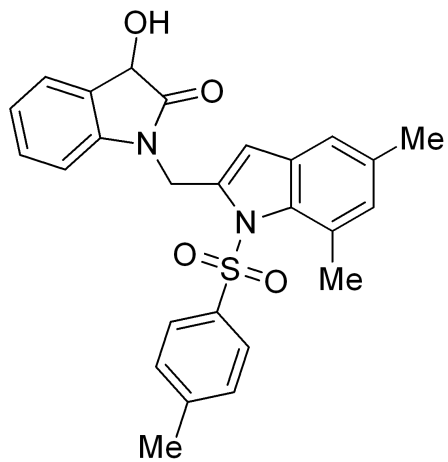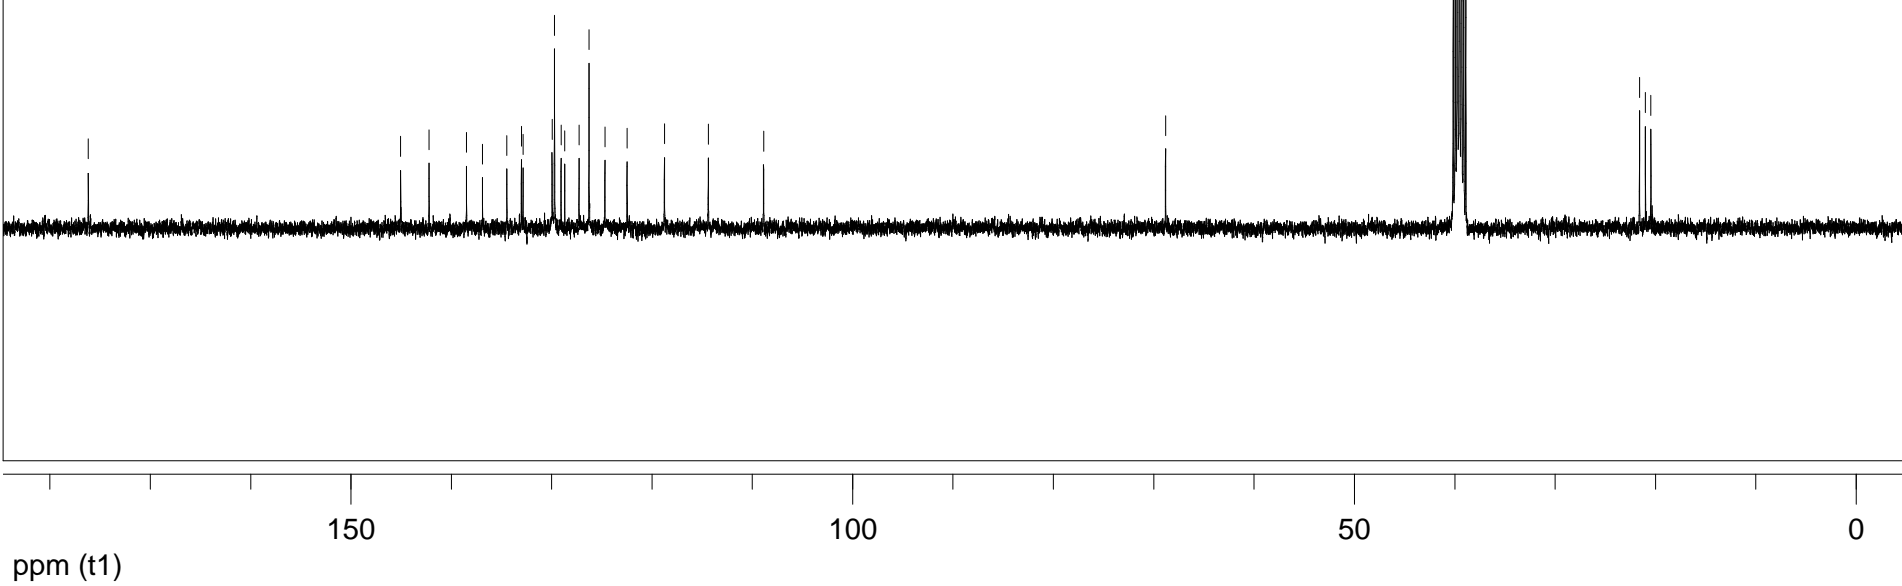

$^1\text{H}$  NMR (Varian, 400 MHz) spectrum of compound **6a** in  $\text{DMSO-}d_6$

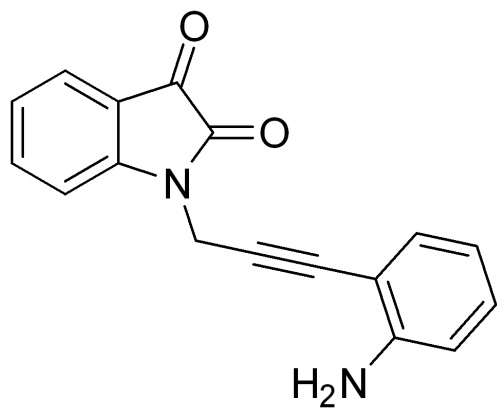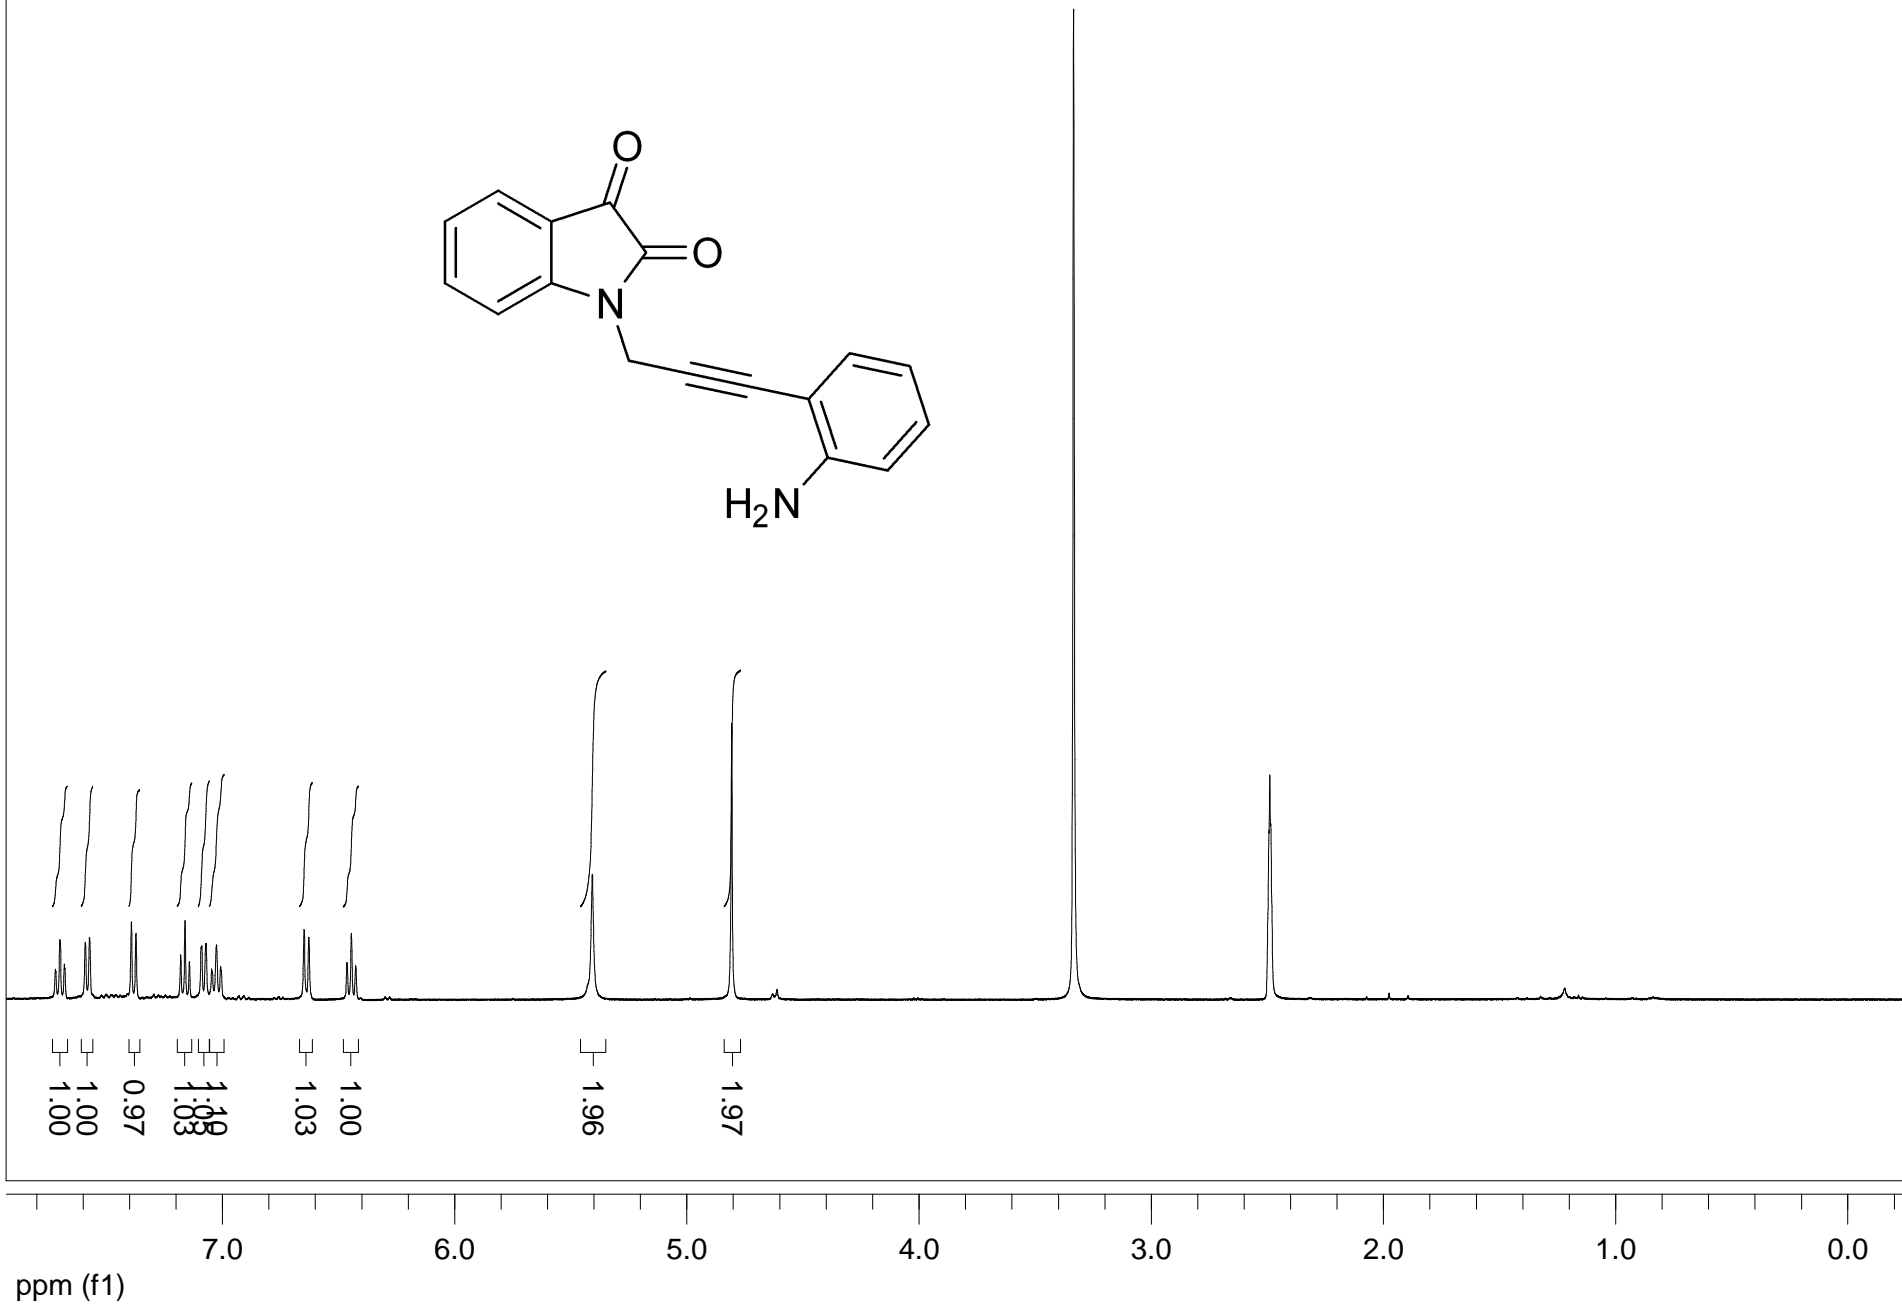



<sup>13</sup>C NMR spectrum (Varian, 100 MHz) of compound **6a** in DMSO-*d*<sub>6</sub>

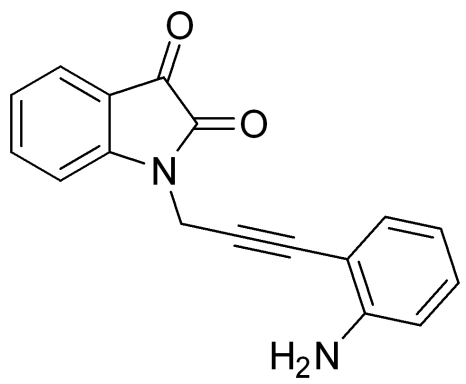

- 183.241
- 157.852
- 150.579
- 150.150
- 138.419
- 132.147
- 130.329
- 124.877
- 123.906
- 118.236
- 115.963
- 114.165
- 111.806
- 105.061
- 87.781
- 81.235

- 30.551

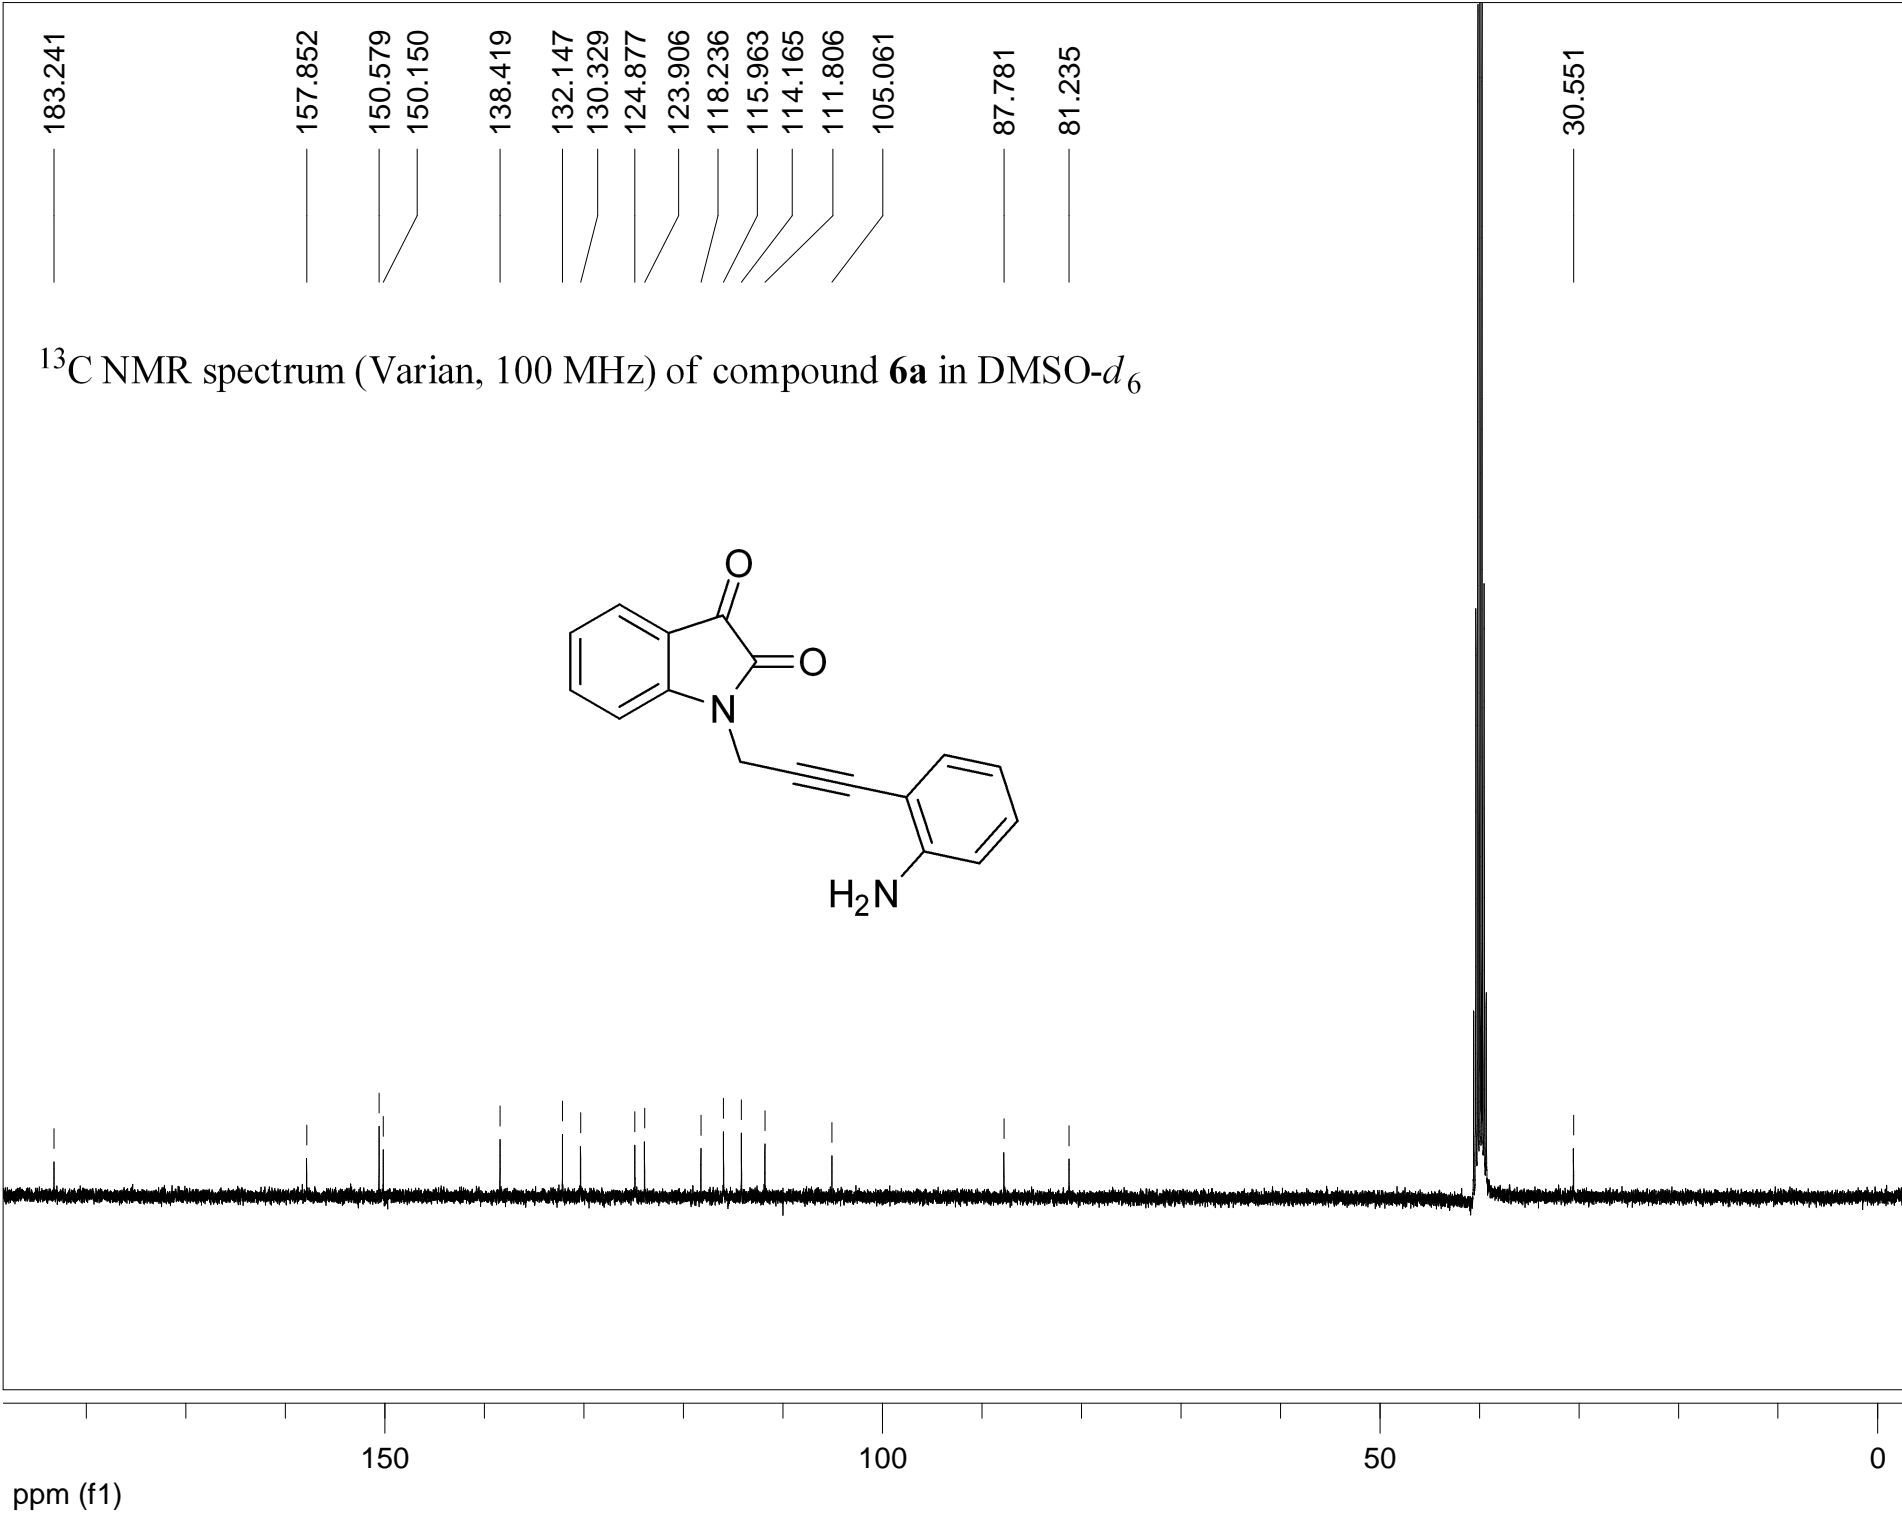

$^1\text{H}$  NMR (Varian, 400 MHz) spectrum of compound **6b** in  $\text{DMSO-}d_6$

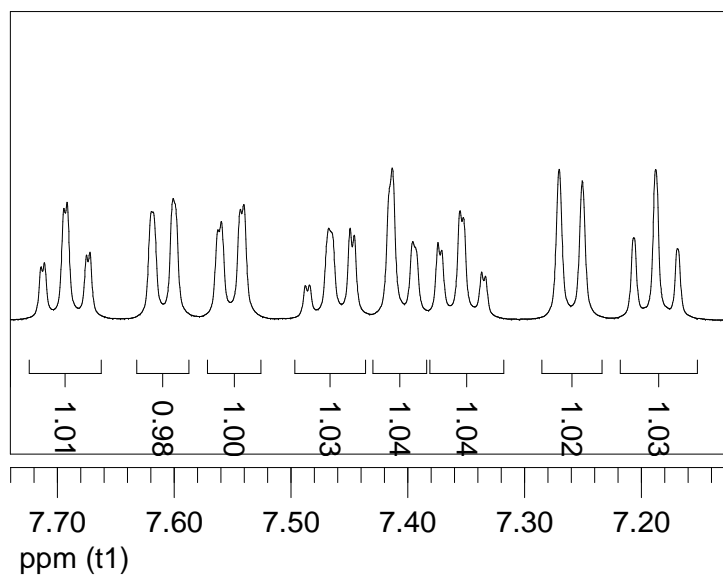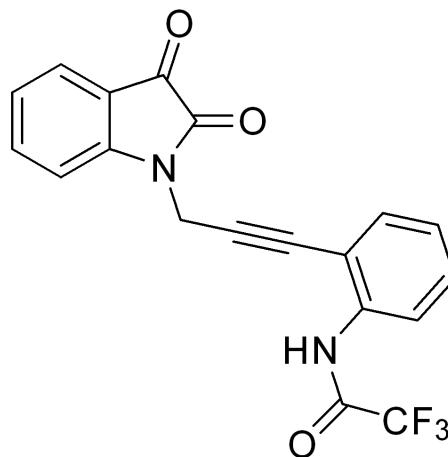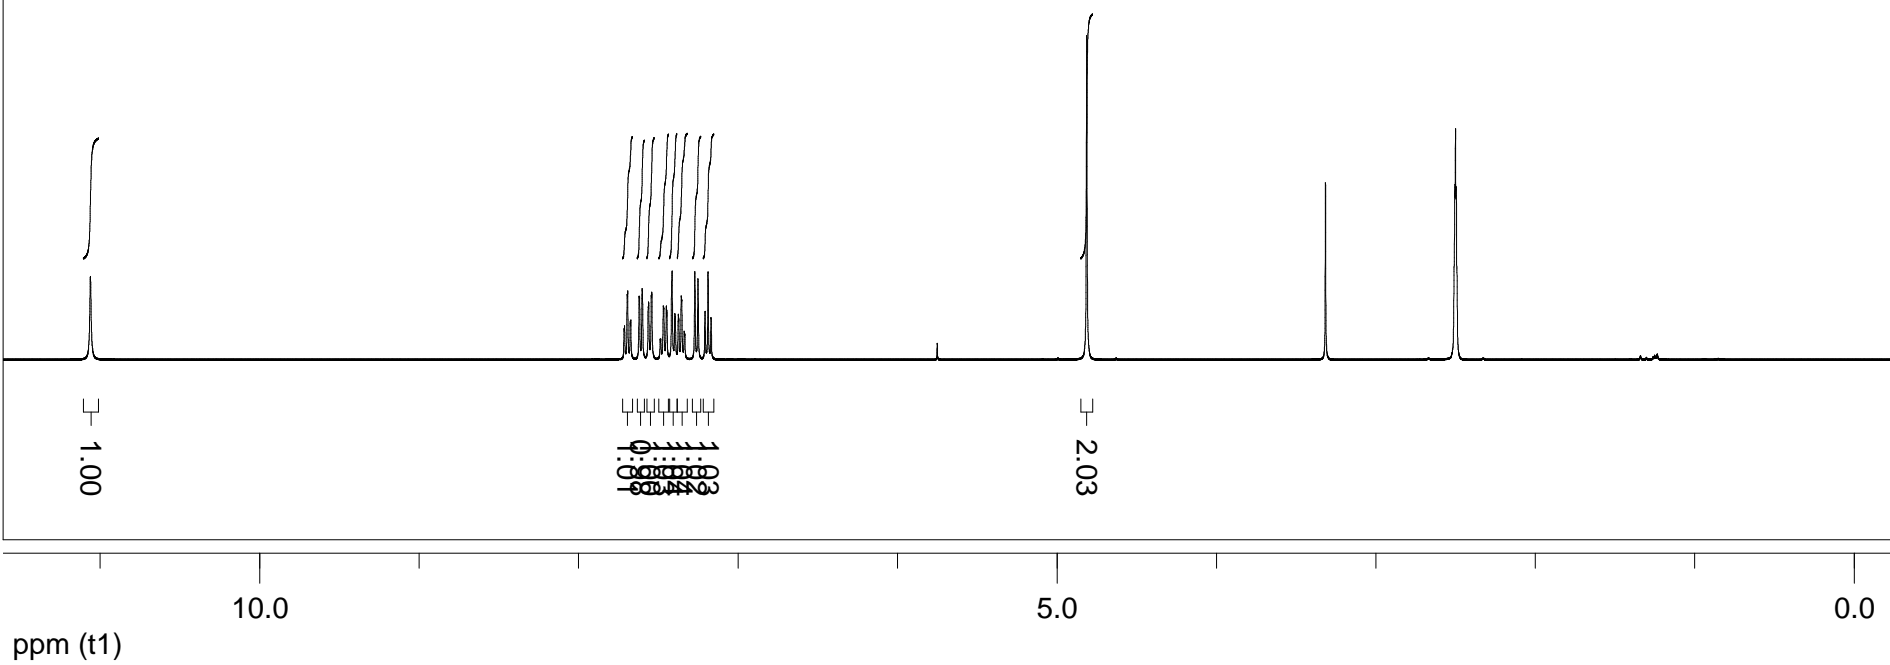

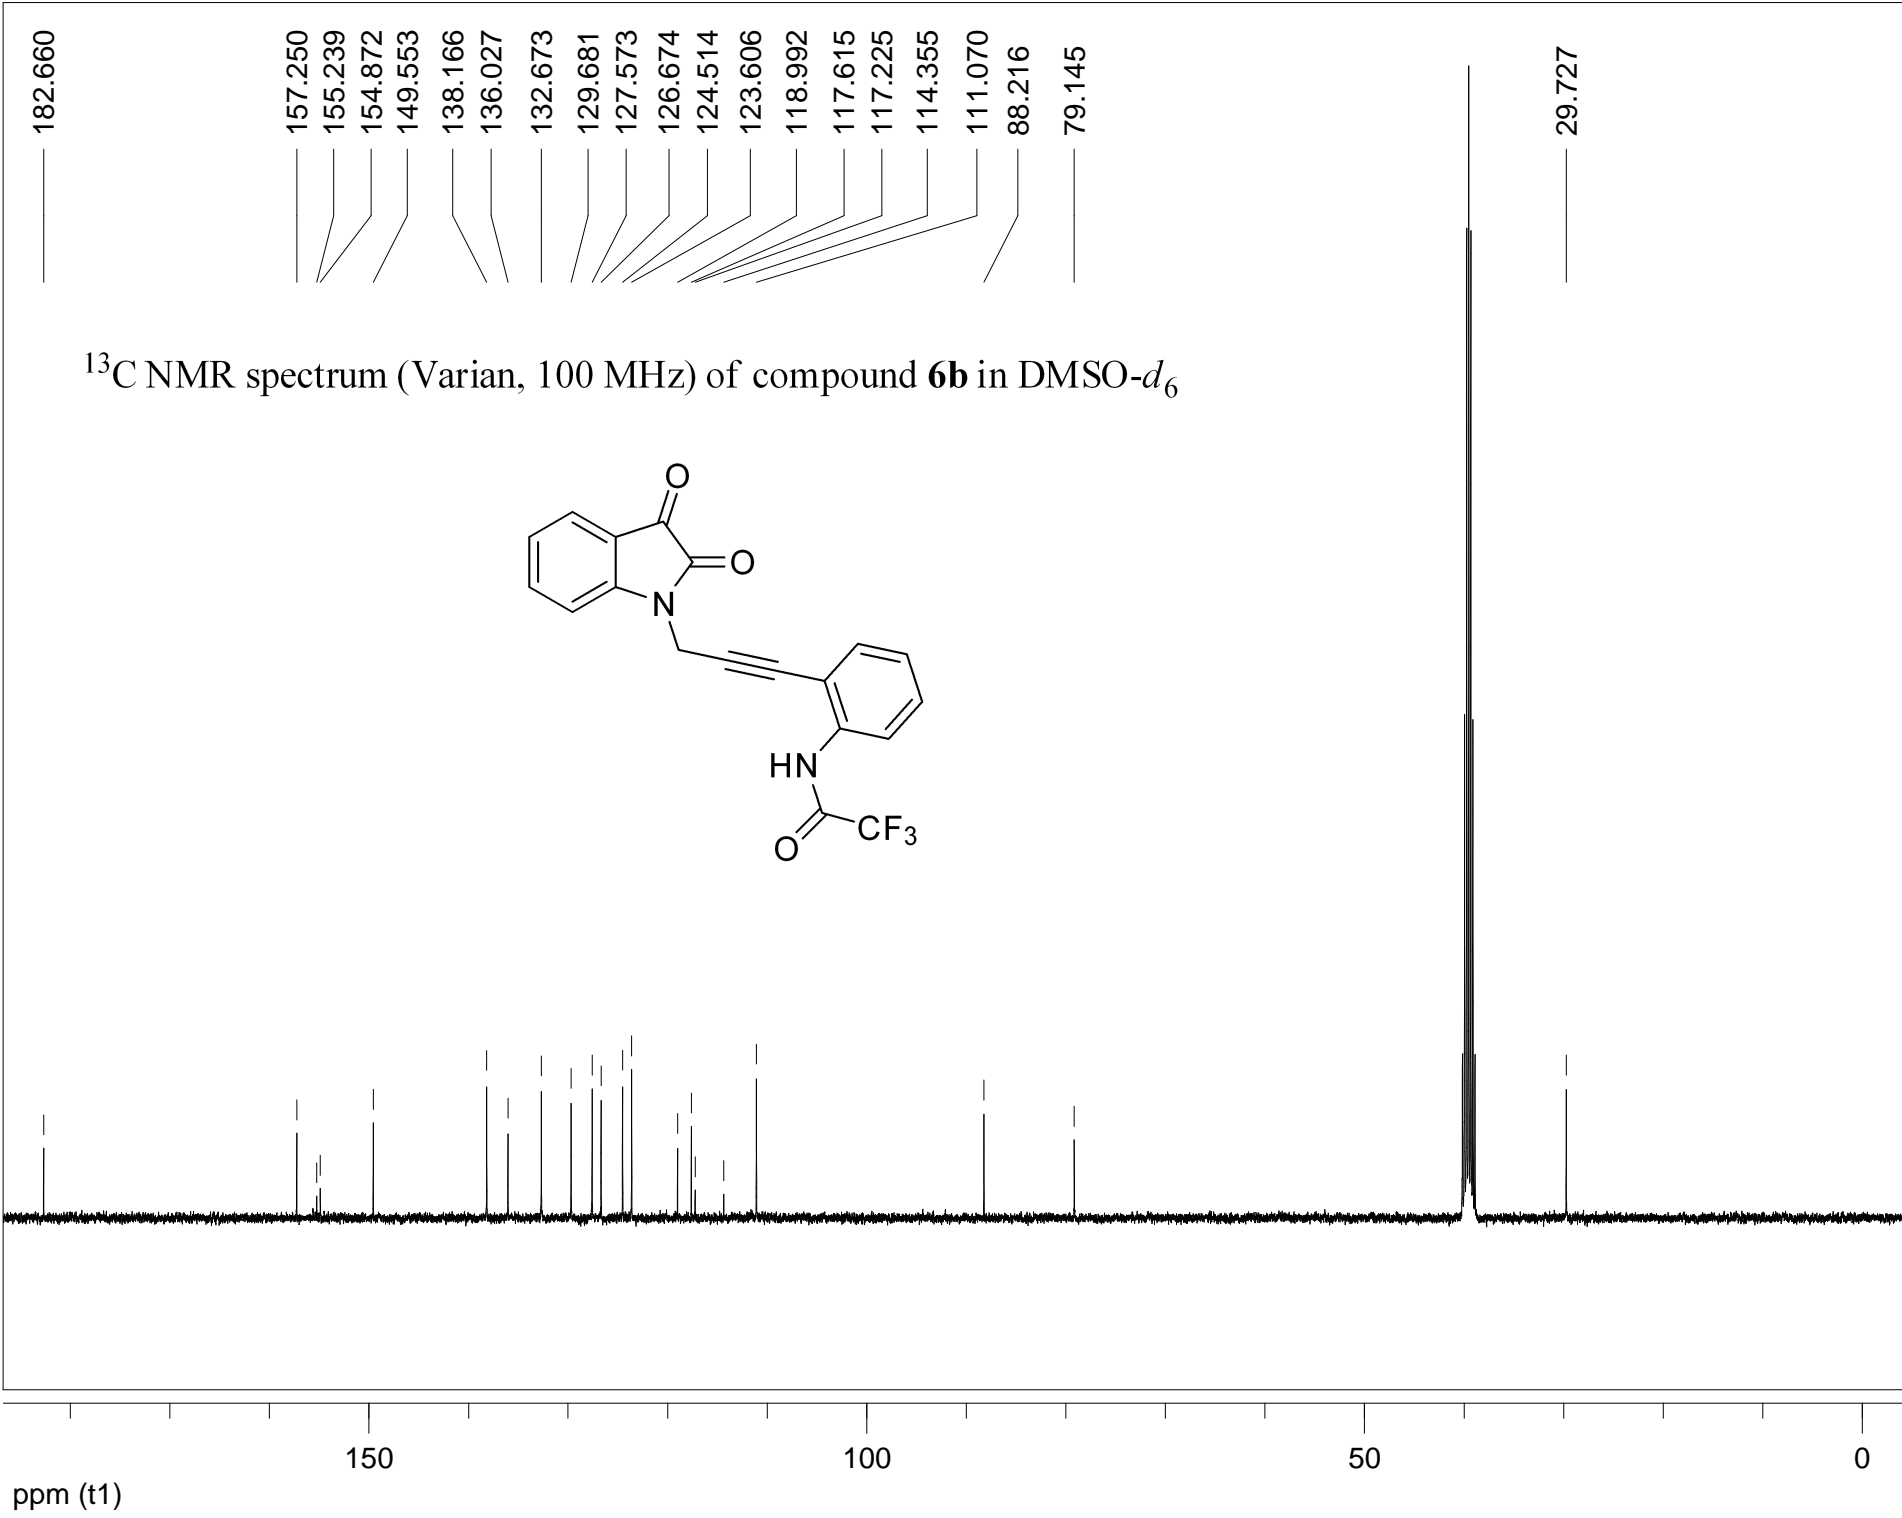

# Mass spectrum of compound 1

|                      |                |                    |          |                        |          |                               |                        |
|----------------------|----------------|--------------------|----------|------------------------|----------|-------------------------------|------------------------|
| <b>Sample Name</b>   | ILS-GSR-I2-alk | <b>Position</b>    | Vial 6   | <b>Instrument Name</b> | LCMS     | <b>User Name</b>              |                        |
| <b>Inj Vol</b>       | 2              | <b>InjPosition</b> |          | <b>SampleType</b>      | Sample   | <b>IRM Calibration Status</b> | Not Applicable         |
| <b>Data Filename</b> | 161018M007.d   | <b>ACQ Method</b>  | MMI-SM.m | <b>Comment</b>         | MM18J020 | <b>Acquired Time</b>          | 10/16/2018 12:27:41 PM |

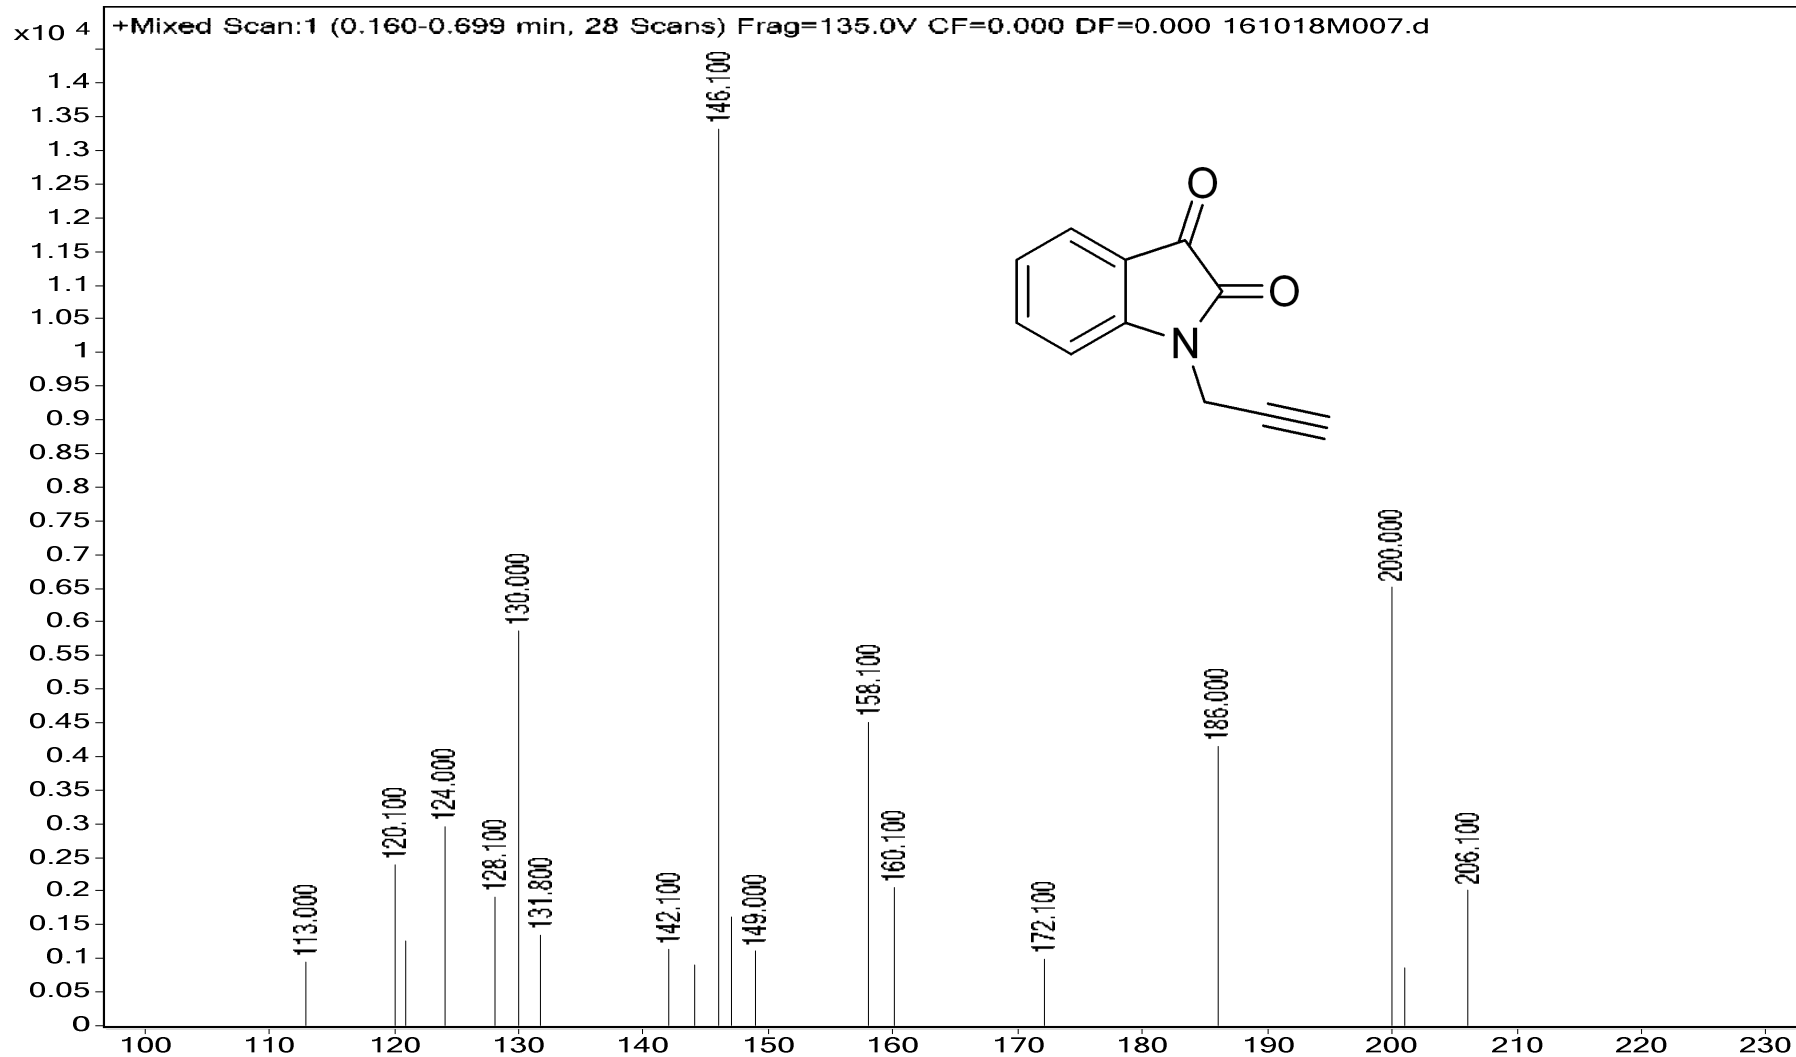

# Mass spectrum of compound 3a

|                      |                  |                    |          |                        |          |                               |                       |
|----------------------|------------------|--------------------|----------|------------------------|----------|-------------------------------|-----------------------|
| <b>Sample Name</b>   | ILS-GSR-I2-Cl-Ts | <b>Position</b>    | Vial 10  | <b>Instrument Name</b> | LCMS     | <b>User Name</b>              |                       |
| <b>Inj Vol</b>       | 2                | <b>InjPosition</b> |          | <b>SampleType</b>      | Sample   | <b>IRM Calibration Status</b> | Not Applicable        |
| <b>Data Filename</b> | 241218M010.d     | <b>ACQ Method</b>  | MMI-SM.m | <b>Comment</b>         | MM18L033 | <b>Acquired Time</b>          | 12/24/2018 2:00:20 PM |

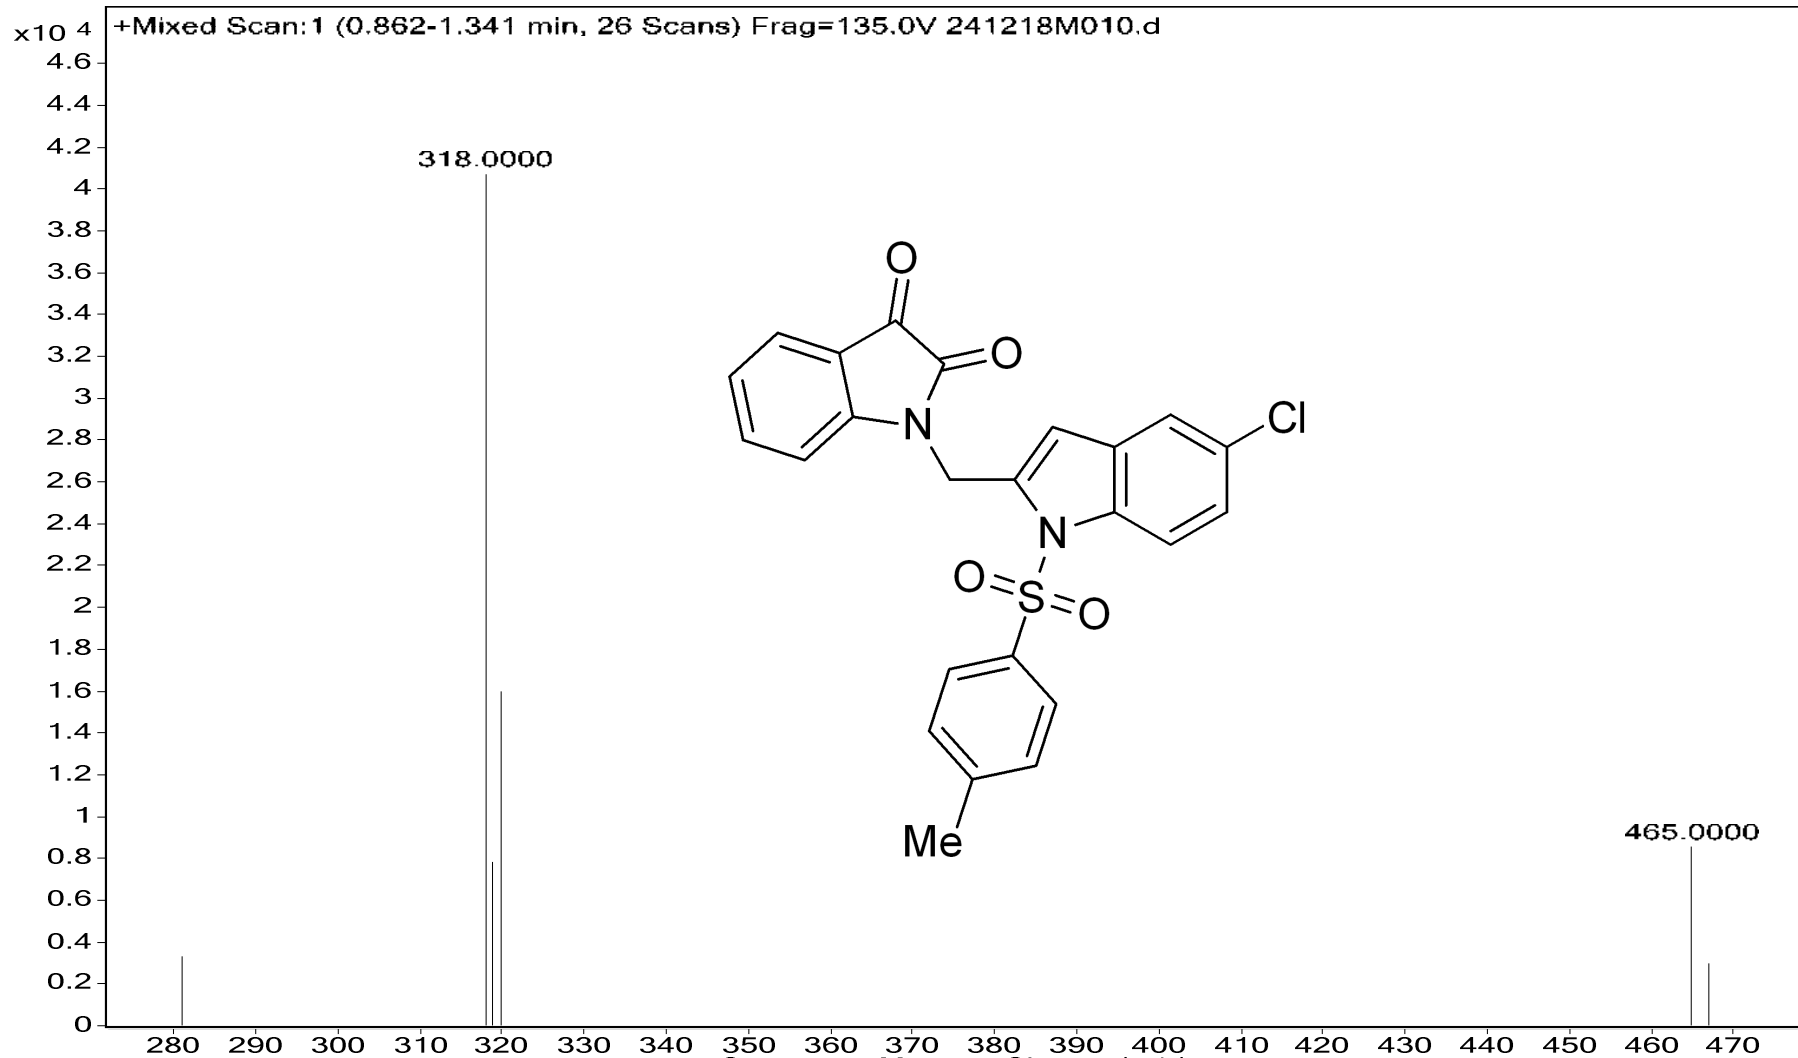

# Mass spectrum of compound **3b**

|                      |                 |                    |          |                        |          |                               |                      |
|----------------------|-----------------|--------------------|----------|------------------------|----------|-------------------------------|----------------------|
| <b>Sample Name</b>   | ILS/GSR/I2/BrTS | <b>Position</b>    | Vial 60  | <b>Instrument Name</b> | LCMS     | <b>User Name</b>              |                      |
| <b>Inj Vol</b>       | 5               | <b>InjPosition</b> |          | <b>SampleType</b>      | Sample   | <b>IRM Calibration Status</b> | Not Applicable       |
| <b>Data Filename</b> | 081118M010.d    | <b>ACQ Method</b>  | MMI-SM.m | <b>Comment</b>         | MM18K008 | <b>Acquired Time</b>          | 11/8/2018 2:37:06 PM |

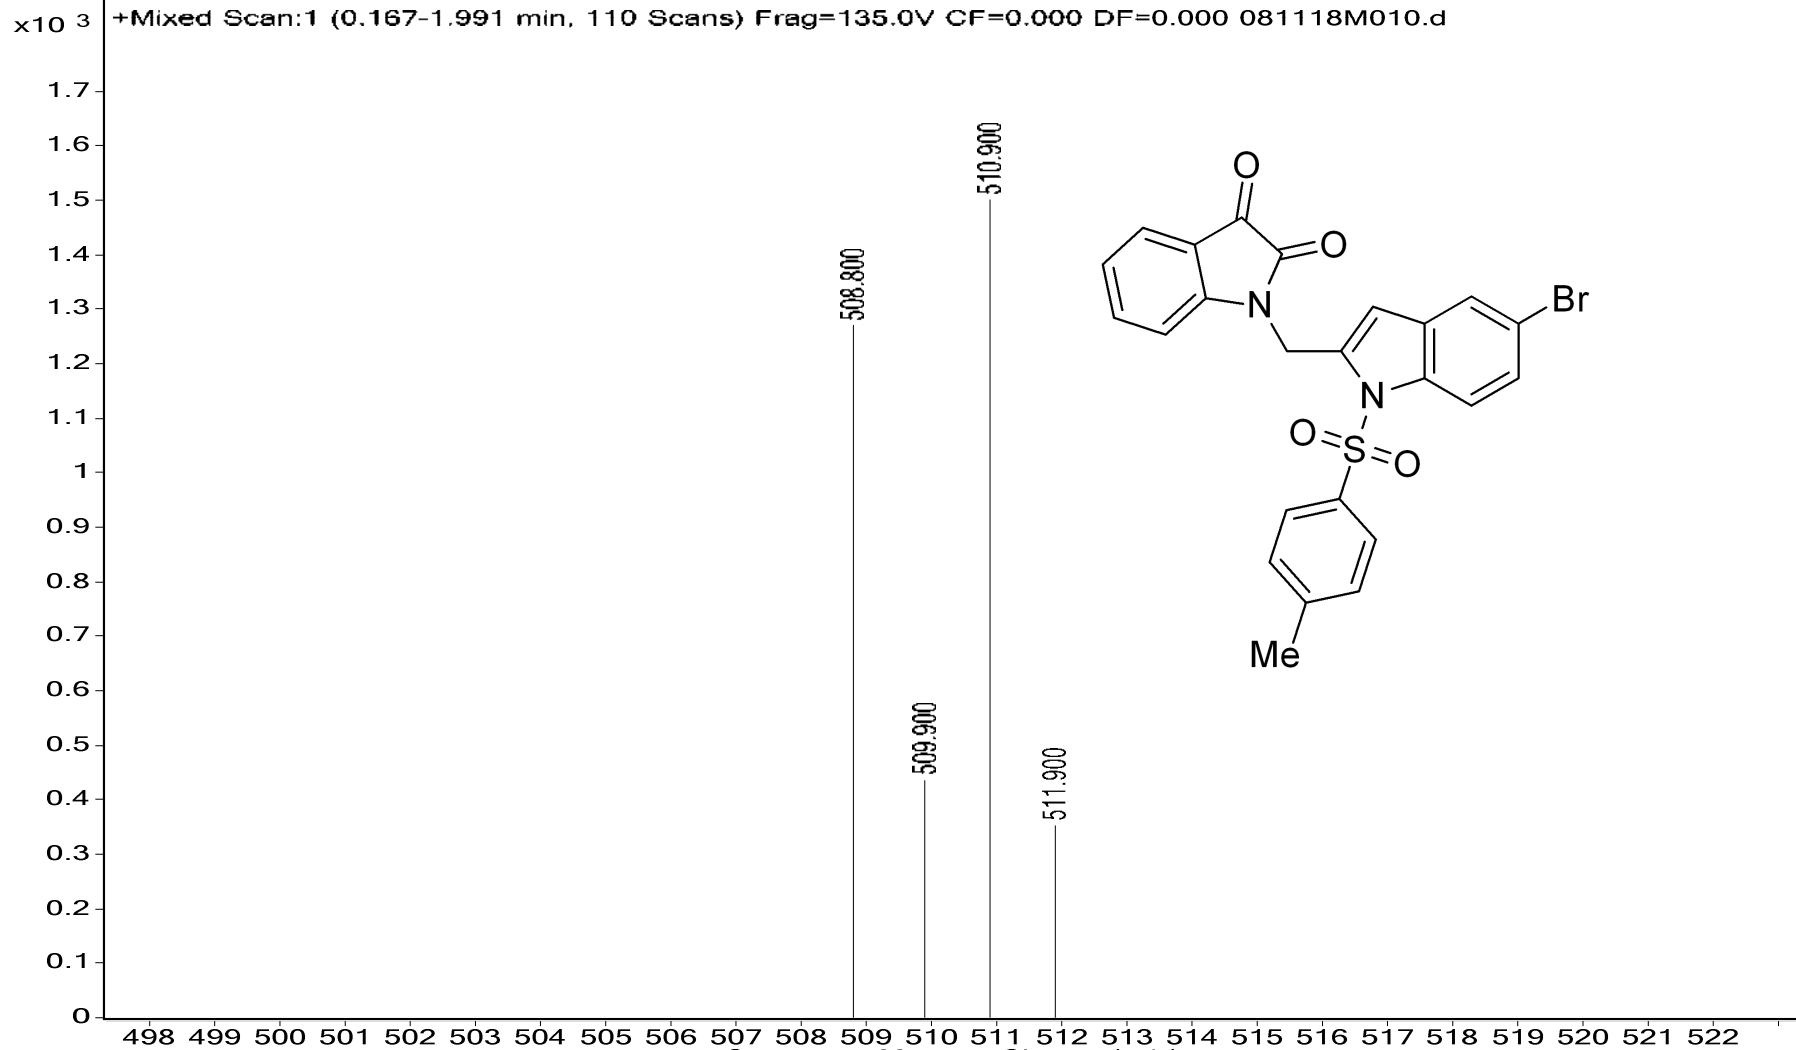

# Mass spectrum of compound 3c

|                      |                |                    |          |                        |          |                               |                       |
|----------------------|----------------|--------------------|----------|------------------------|----------|-------------------------------|-----------------------|
| <b>Sample Name</b>   | ILS-GSR-I2-FTS | <b>Position</b>    | Vial 6   | <b>Instrument Name</b> | LCMS     | <b>User Name</b>              |                       |
| <b>Inj Vol</b>       | 5              | <b>InjPosition</b> |          | <b>SampleType</b>      | Sample   | <b>IRM Calibration Status</b> | Not Applicable        |
| <b>Data Filename</b> | 051118M014.d   | <b>ACQ Method</b>  | MMI-SM.m | <b>Comment</b>         | MM18K005 | <b>Acquired Time</b>          | 11/5/2018 12:28:53 PM |

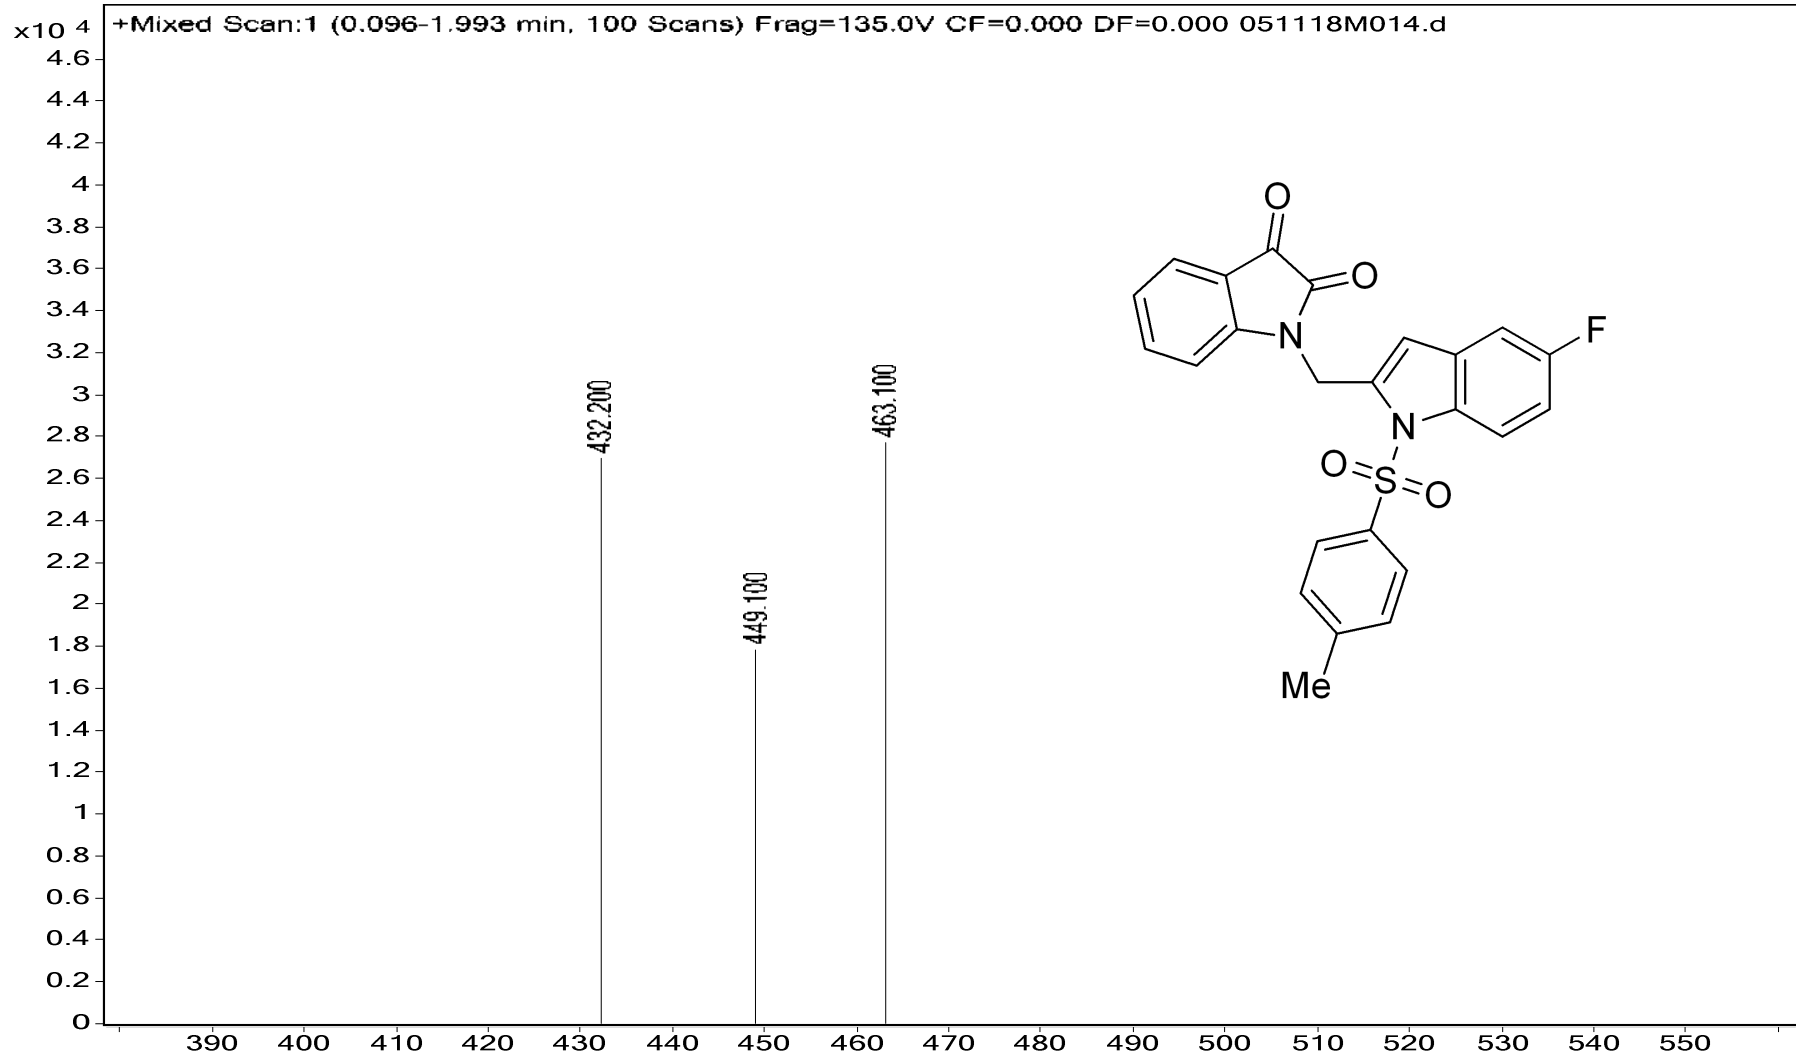

# Mass spectrum of compound 3d

|                      |               |                    |          |                        |          |                               |                       |
|----------------------|---------------|--------------------|----------|------------------------|----------|-------------------------------|-----------------------|
| <b>Sample Name</b>   | ILS-GSR-I2-Ts | <b>Position</b>    | Vial 26  | <b>Instrument Name</b> | LCMS     | <b>User Name</b>              |                       |
| <b>Inj Vol</b>       | 2             | <b>InjPosition</b> |          | <b>SampleType</b>      | Sample   | <b>IRM Calibration Status</b> | Not Applicable        |
| <b>Data Filename</b> | 301018M013.d  | <b>ACQ Method</b>  | MMI-SM.m | <b>Comment</b>         | MM18J040 | <b>Acquired Time</b>          | 10/30/2018 2:36:42 PM |

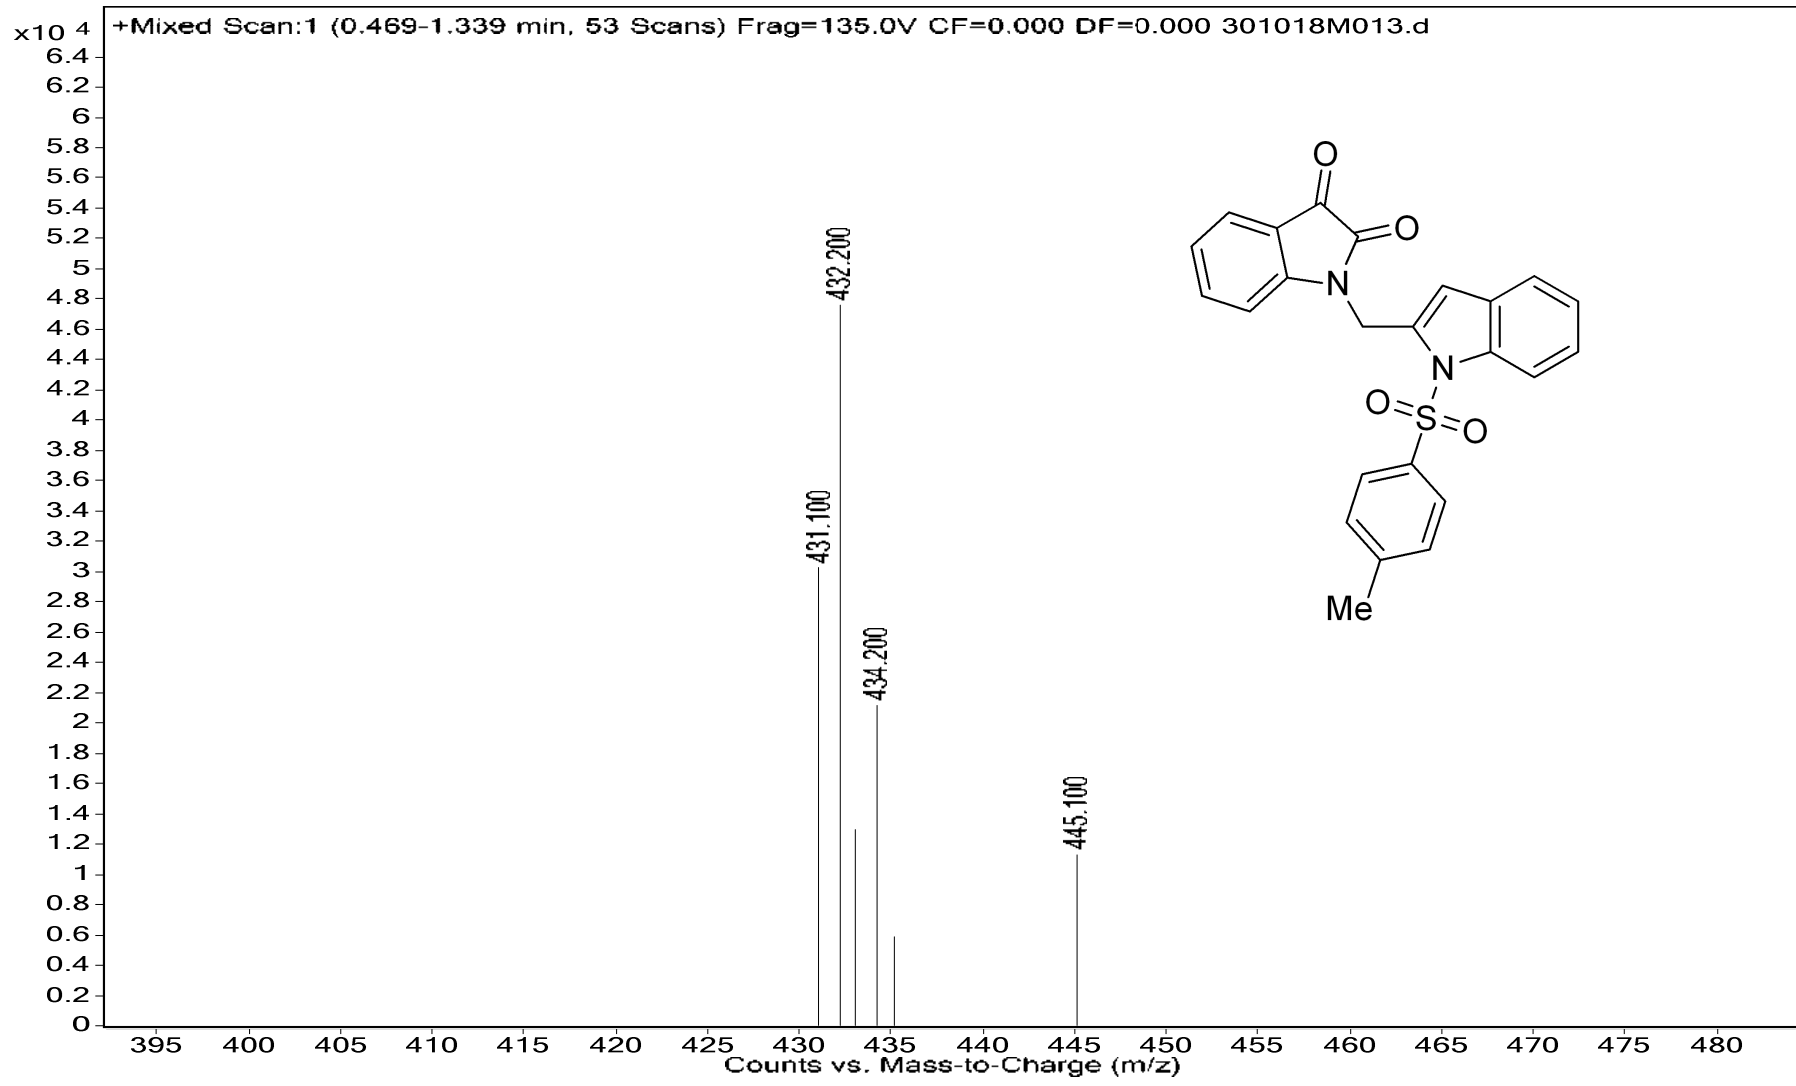



# Mass spectrum of compound 3e

|                      |                  |                    |          |                        |          |                               |                       |
|----------------------|------------------|--------------------|----------|------------------------|----------|-------------------------------|-----------------------|
| <b>Sample Name</b>   | ILS-GSR-I2-CL-MS | <b>Position</b>    | Vial 8   | <b>Instrument Name</b> | LCMS     | <b>User Name</b>              |                       |
| <b>Inj Vol</b>       | 5                | <b>InjPosition</b> |          | <b>SampleType</b>      | Sample   | <b>IRM Calibration Status</b> | Not Applicable        |
| <b>Data Filename</b> | 161118M004.d     | <b>ACQ Method</b>  | ESI-SM.m | <b>Comment</b>         | MM18K017 | <b>Acquired Time</b>          | 11/16/2018 1:05:54 PM |

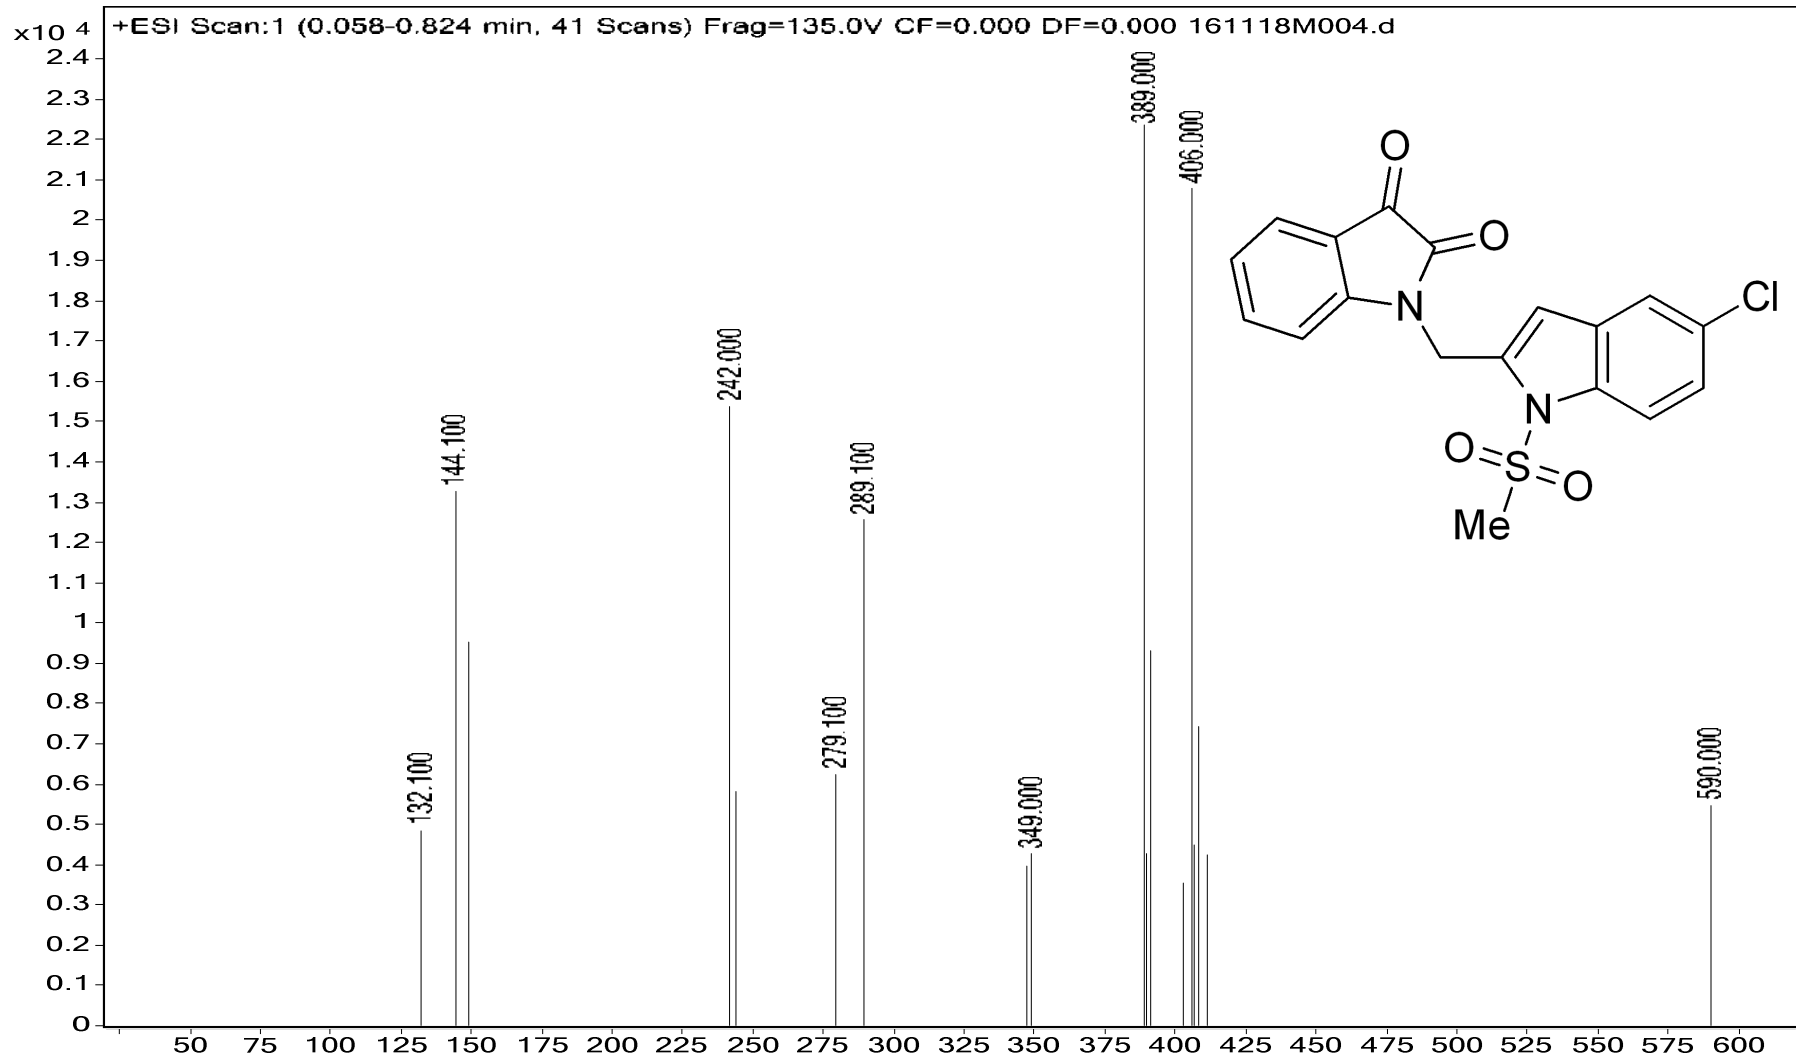

# Mass spectrum of compound 3f

|                      |                |                    |          |                        |          |                               |                       |
|----------------------|----------------|--------------------|----------|------------------------|----------|-------------------------------|-----------------------|
| <b>Sample Name</b>   | ILS-GSR-I2-Ben | <b>Position</b>    | Vial 17  | <b>Instrument Name</b> | LCMS     | <b>User Name</b>              |                       |
| <b>Inj Vol</b>       | 8              | <b>InjPosition</b> |          | <b>SampleType</b>      | Sample   | <b>IRM Calibration Status</b> | Not Applicable        |
| <b>Data Filename</b> | 131218M020A.d  | <b>ACQ Method</b>  | MMI-SM.m | <b>Comment</b>         | MM18L014 | <b>Acquired Time</b>          | 12/13/2018 3:14:04 PM |

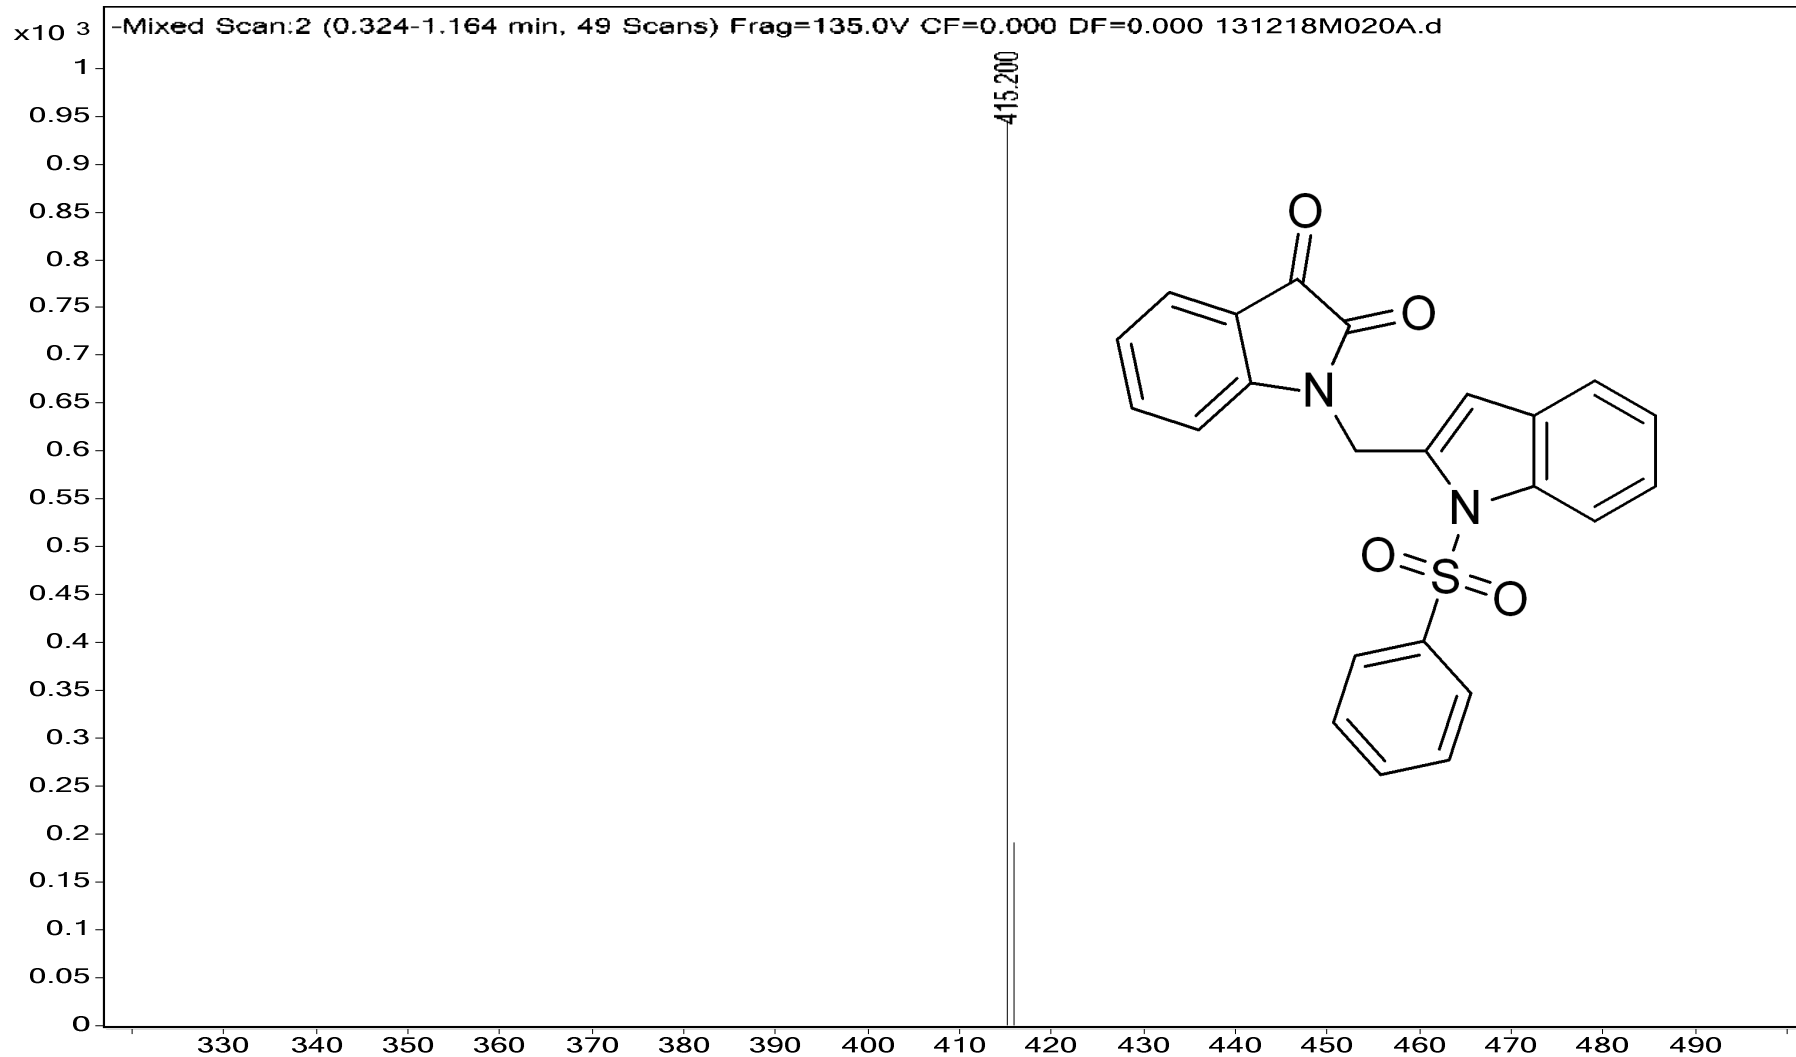

# Mass spectrum of compound 3g

|                      |               |                    |          |                        |          |                               |                       |
|----------------------|---------------|--------------------|----------|------------------------|----------|-------------------------------|-----------------------|
| <b>Sample Name</b>   | ILS-GSR-I2-Th | <b>Position</b>    | Vial 11  | <b>Instrument Name</b> | LCMS     | <b>User Name</b>              |                       |
| <b>Inj Vol</b>       | 3             | <b>InjPosition</b> |          | <b>SampleType</b>      | Sample   | <b>IRM Calibration Status</b> | Not Applicable        |
| <b>Data Filename</b> | 171019M012.d  | <b>ACQ Method</b>  | MMI-SM.m | <b>Comment</b>         | MM19J033 | <b>Acquired Time</b>          | 10/17/2019 1:47:26 PM |

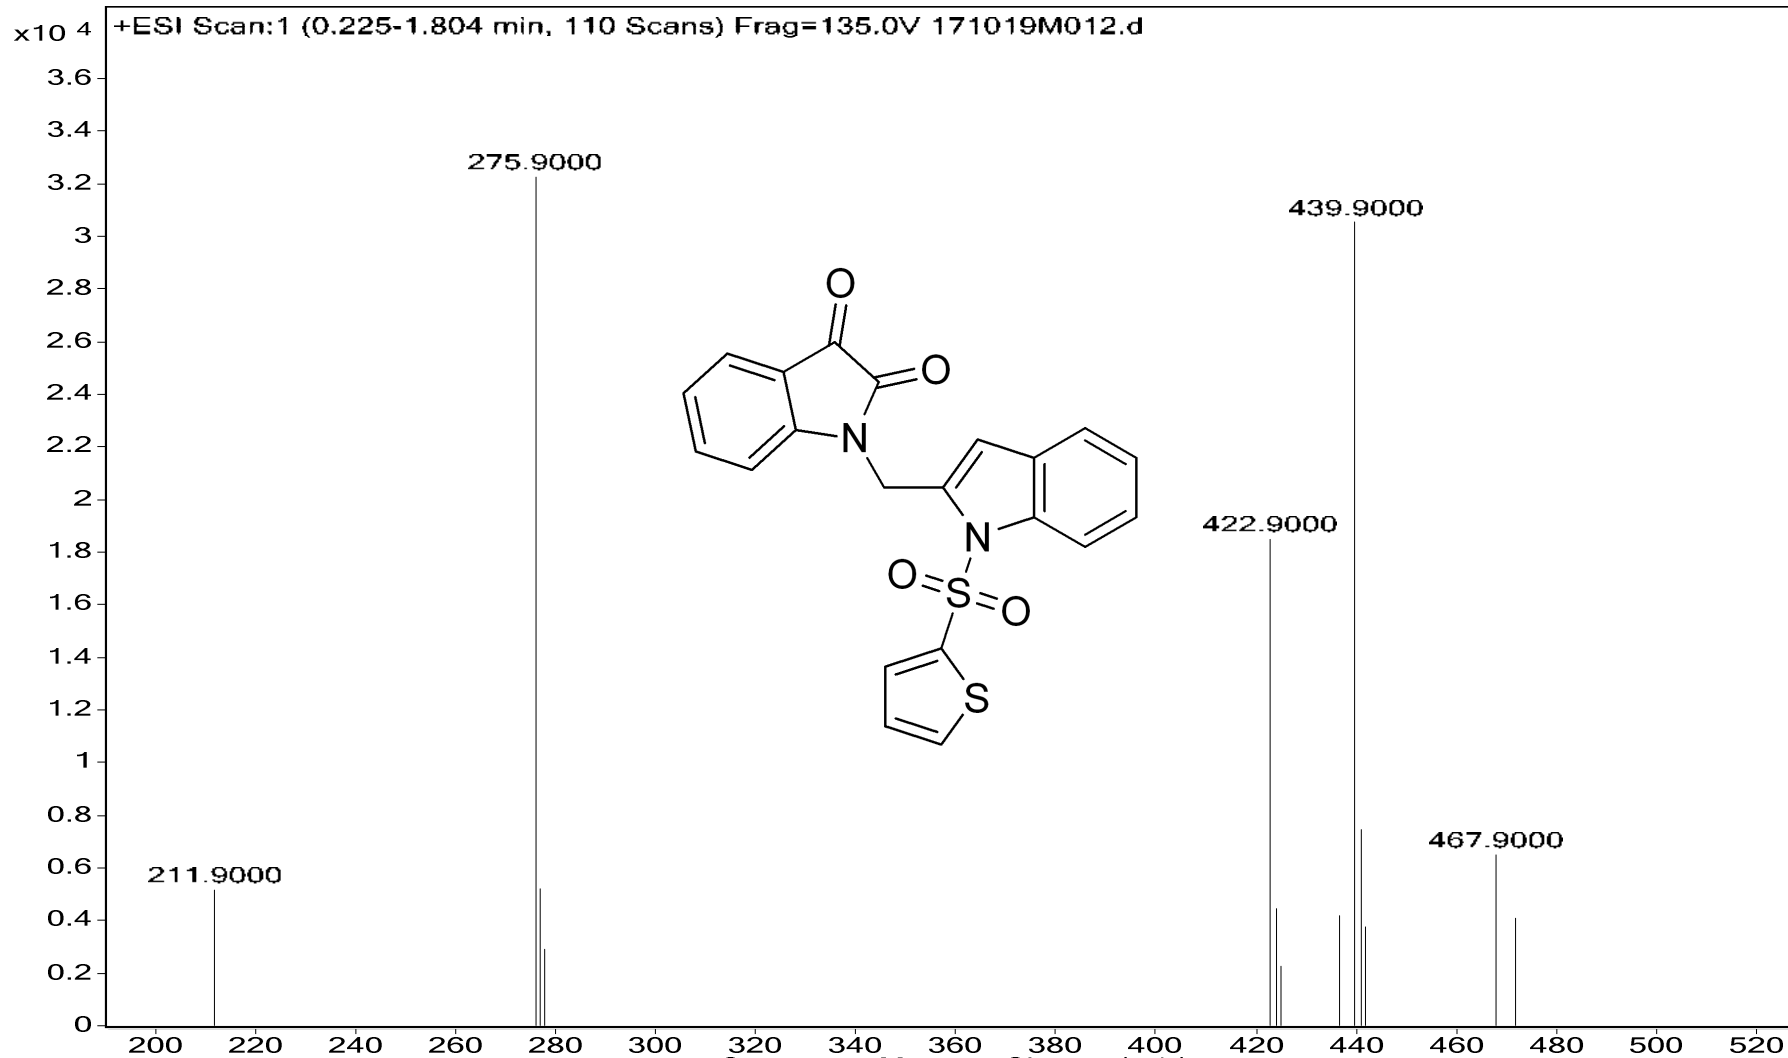

# Mass spectrum of compound 3h

|                      |               |                    |          |                        |          |                               |                       |
|----------------------|---------------|--------------------|----------|------------------------|----------|-------------------------------|-----------------------|
| <b>Sample Name</b>   | ILS-GSR-I2-MS | <b>Position</b>    | Vial 30  | <b>Instrument Name</b> | LCMS     | <b>User Name</b>              |                       |
| <b>Inj Vol</b>       | 10            | <b>InjPosition</b> |          | <b>SampleType</b>      | Sample   | <b>IRM Calibration Status</b> | Not Applicable        |
| <b>Data Filename</b> | 301118M043.d  | <b>ACQ Method</b>  | MMI-SM.m | <b>Comment</b>         | MM18K034 | <b>Acquired Time</b>          | 11/30/2018 4:07:45 PM |

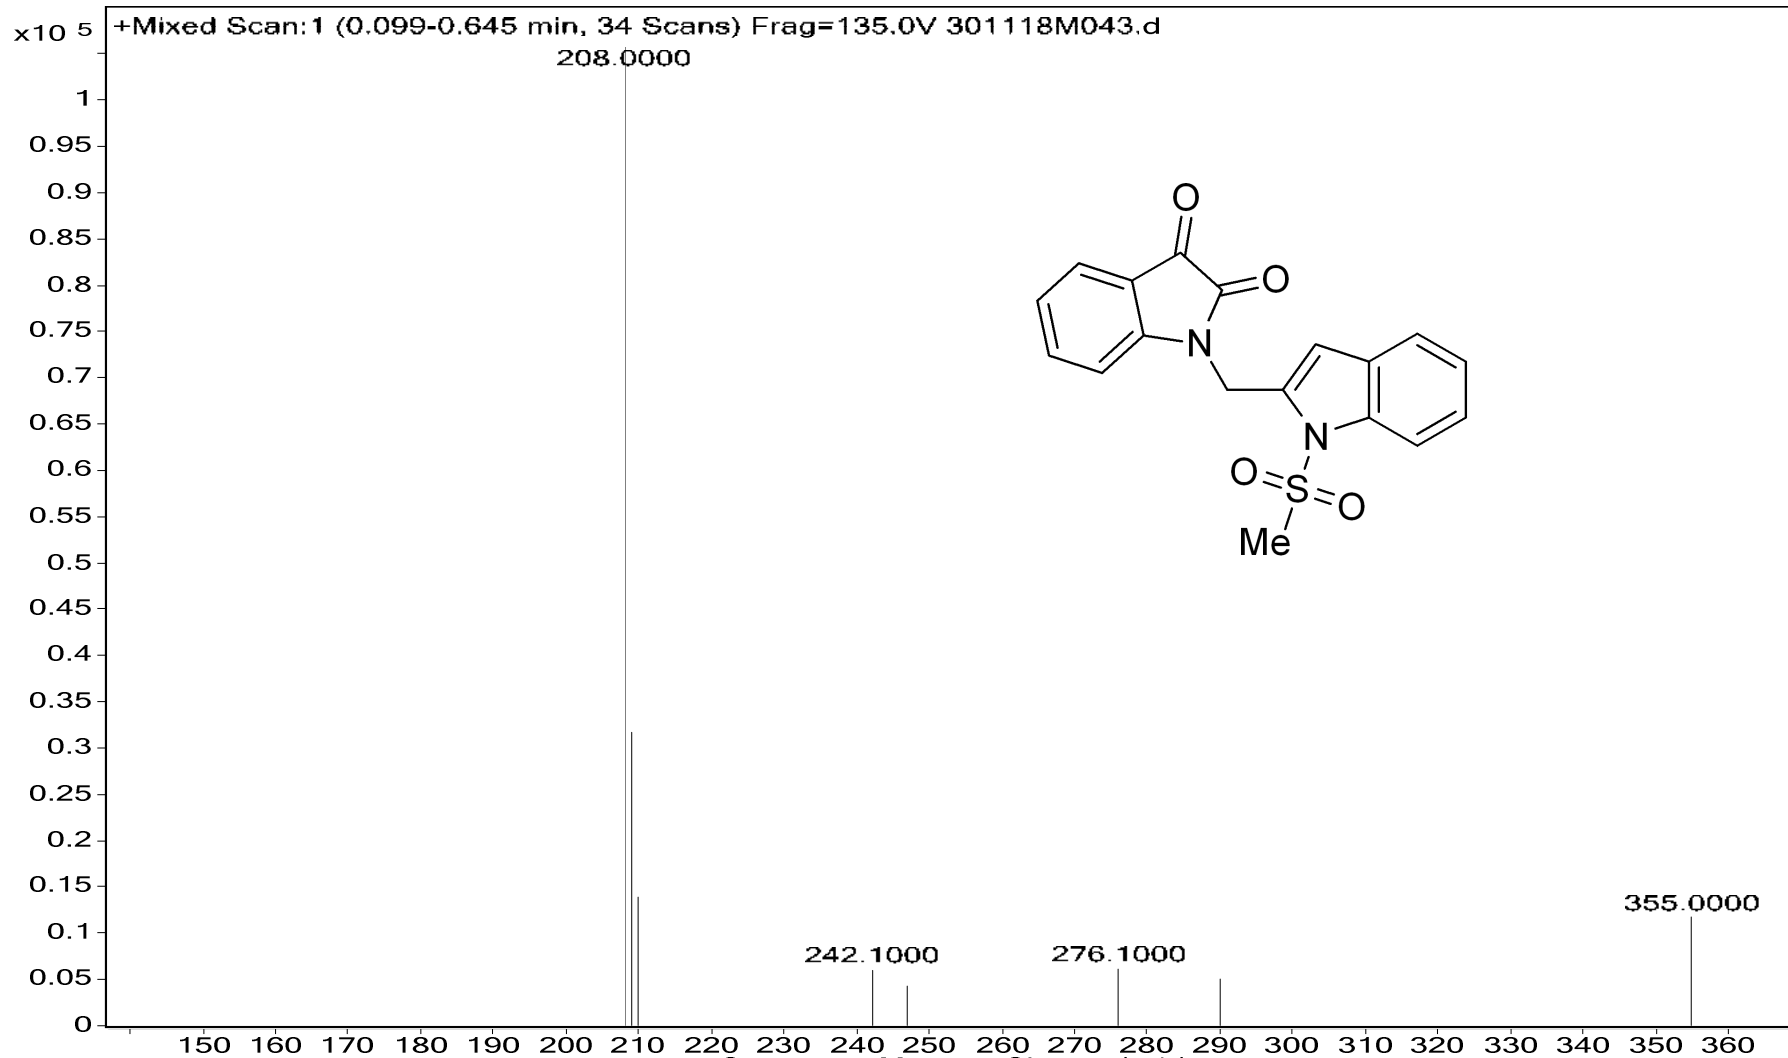

# Mass spectrum of compound 3i

|                      |                |                    |          |                        |          |                               |                      |
|----------------------|----------------|--------------------|----------|------------------------|----------|-------------------------------|----------------------|
| <b>Sample Name</b>   | ILS-GSR-I2-DTS | <b>Position</b>    | Vial 14  | <b>Instrument Name</b> | LCMS     | <b>User Name</b>              |                      |
| <b>Inj Vol</b>       | 8              | <b>InjPosition</b> |          | <b>SampleType</b>      | Sample   | <b>IRM Calibration Status</b> | Not Applicable       |
| <b>Data Filename</b> | 040419M004.d   | <b>ACQ Method</b>  | MMI-SM.m | <b>Comment</b>         | MM19D003 | <b>Acquired Time</b>          | 4/4/2019 12:32:56 PM |

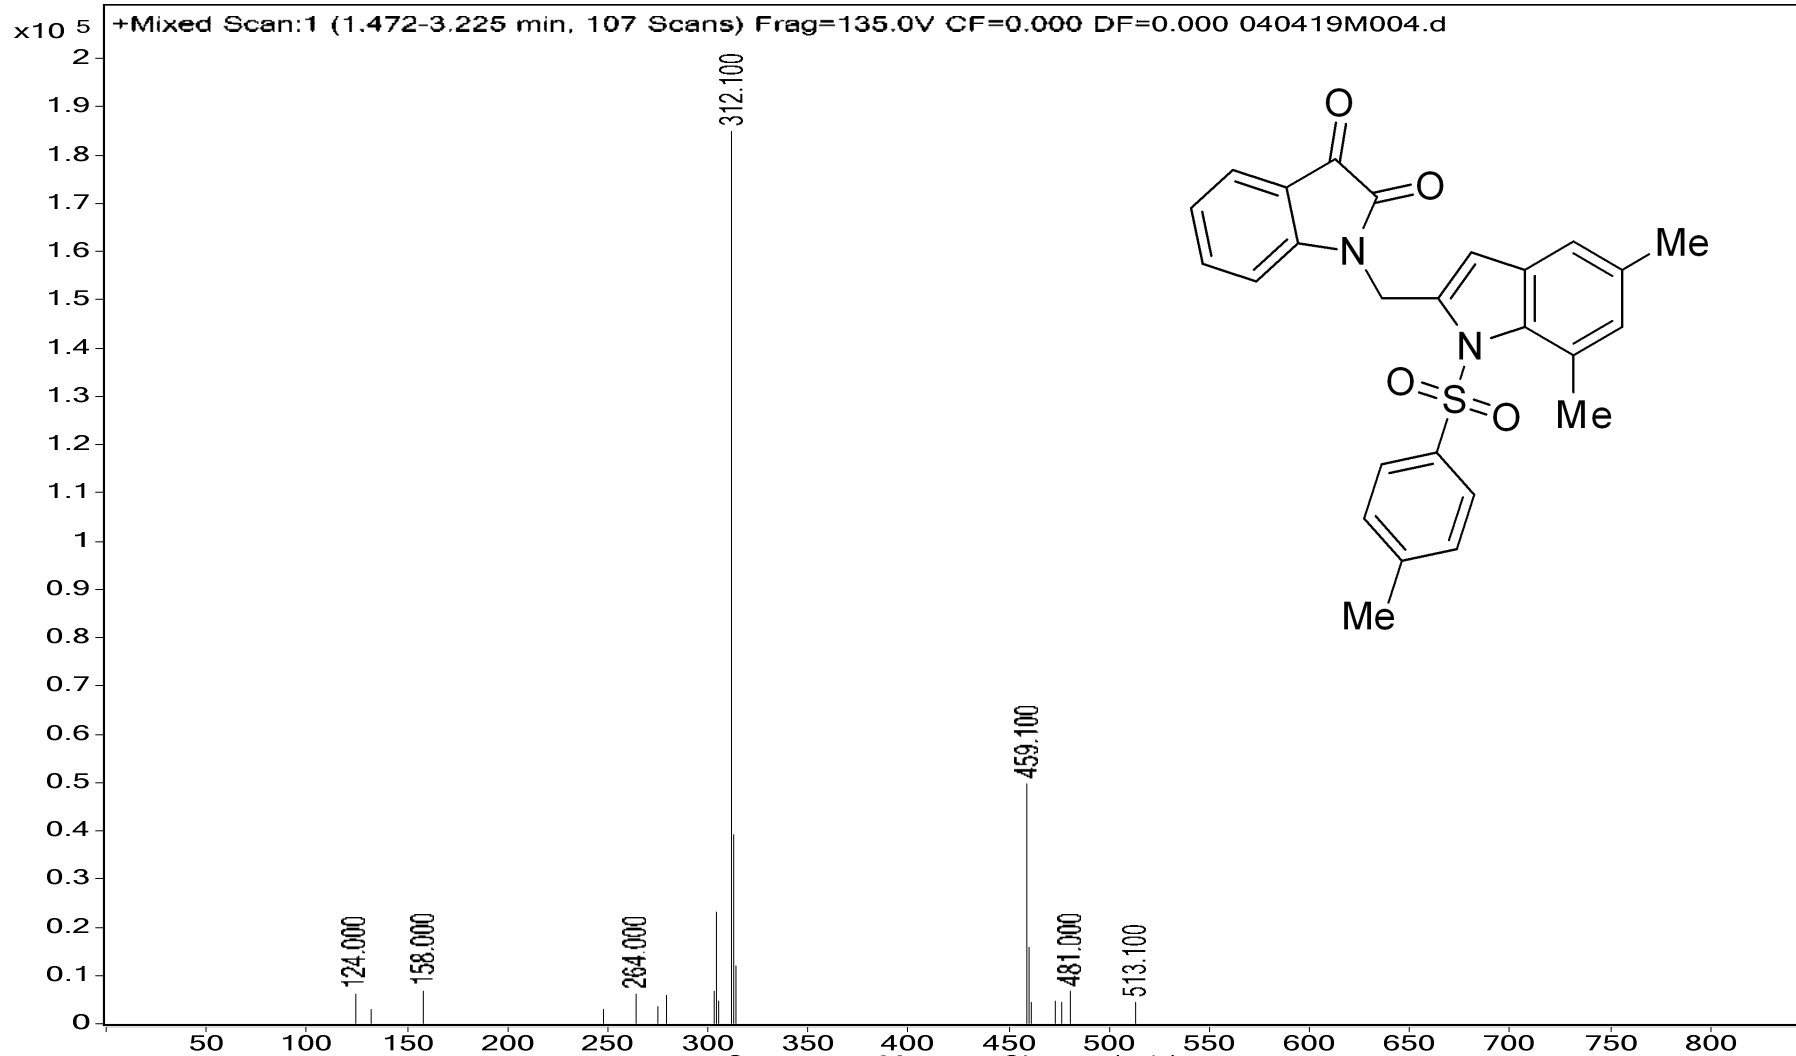

# Mass spectrum of compound 3j

|                      |                |                    |          |                        |          |                               |                     |
|----------------------|----------------|--------------------|----------|------------------------|----------|-------------------------------|---------------------|
| <b>Sample Name</b>   | ILS-GSR-I2-DMS | <b>Position</b>    | Vial 3   | <b>Instrument Name</b> | LCMS     | <b>User Name</b>              |                     |
| <b>Inj Vol</b>       | 2              | <b>InjPosition</b> |          | <b>SampleType</b>      | Sample   | <b>IRM Calibration Status</b> | Not Applicable      |
| <b>Data Filename</b> | 080419LM003.d  | <b>ACQ Method</b>  | MMI-SM.m | <b>Comment</b>         | MM19D008 | <b>Acquired Time</b>          | 4/8/2019 1:21:22 PM |

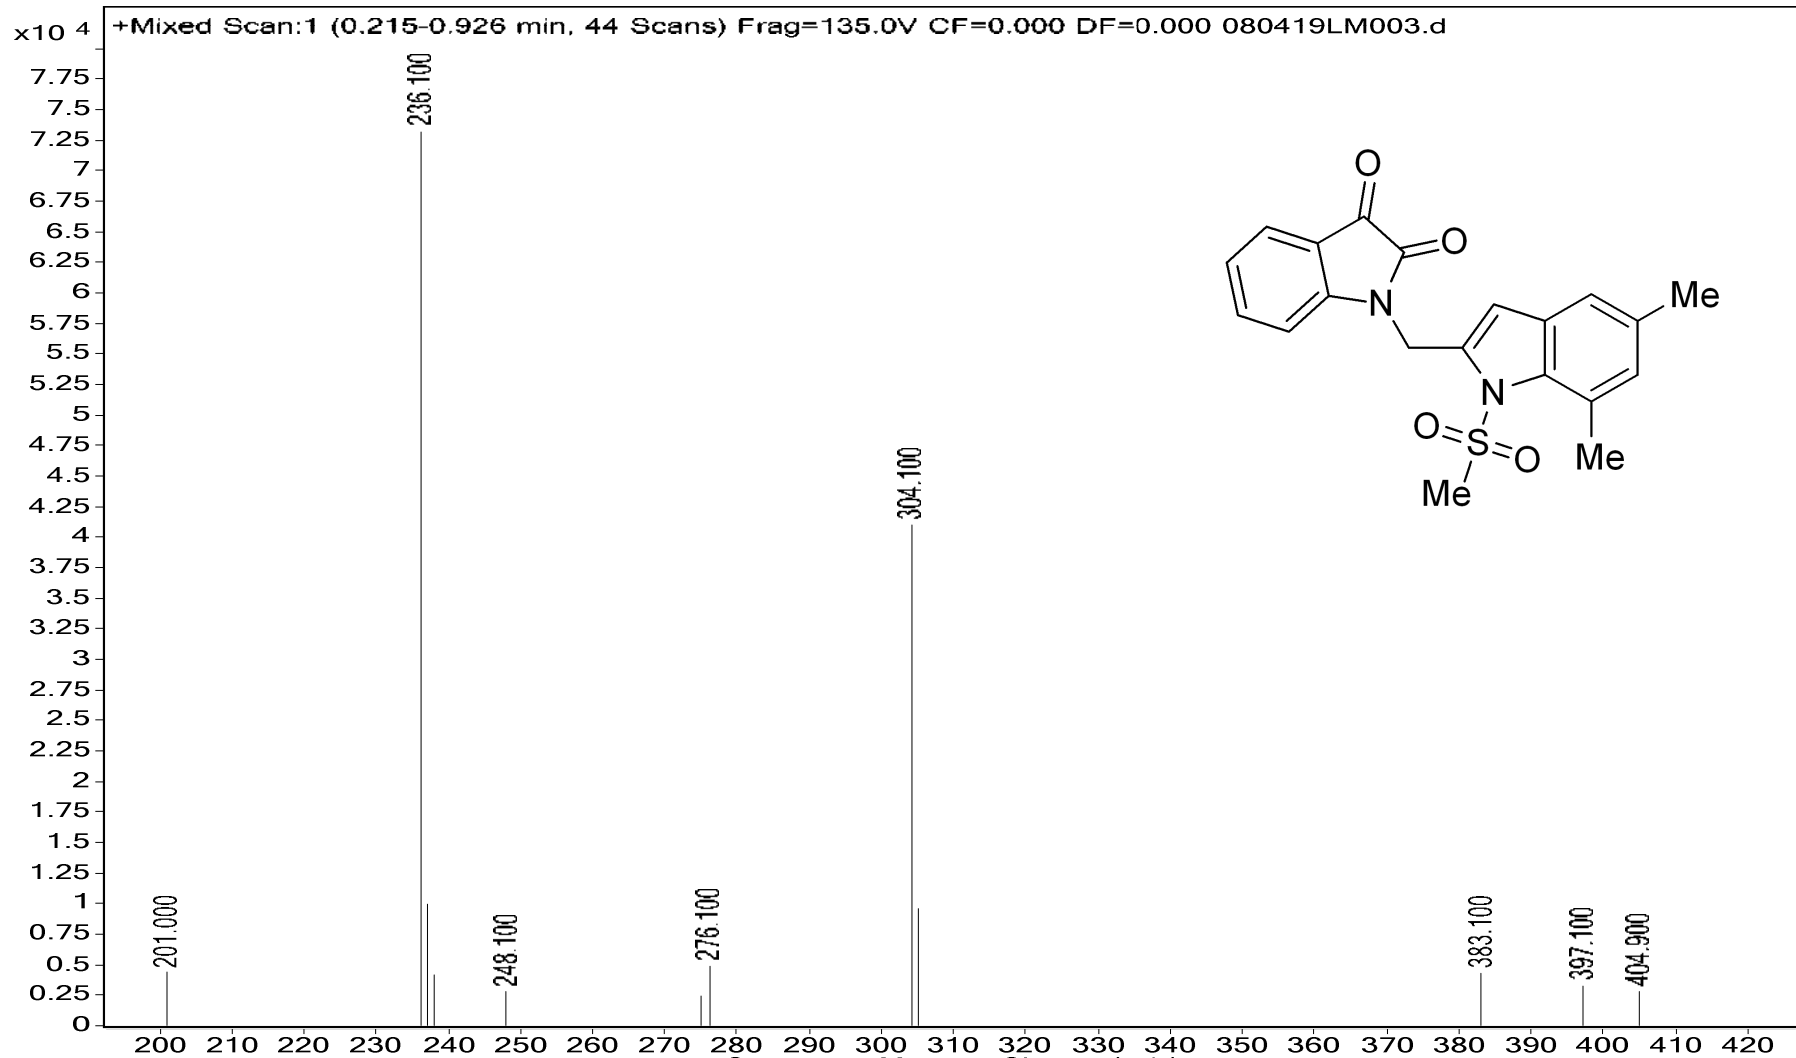

# Mass spectrum of compound 3k

|                      |               |                    |          |                        |          |                               |                      |
|----------------------|---------------|--------------------|----------|------------------------|----------|-------------------------------|----------------------|
| <b>Sample Name</b>   | ILS-GSR-I2-DB | <b>Position</b>    | Vial 30  | <b>Instrument Name</b> | LCMS     | <b>User Name</b>              |                      |
| <b>Inj Vol</b>       | 4             | <b>InjPosition</b> |          | <b>SampleType</b>      | Sample   | <b>IRM Calibration Status</b> | Not Applicable       |
| <b>Data Filename</b> | 100419M014.d  | <b>ACQ Method</b>  | MMI-SM.m | <b>Comment</b>         | MA19D011 | <b>Acquired Time</b>          | 4/10/2019 1:15:39 PM |

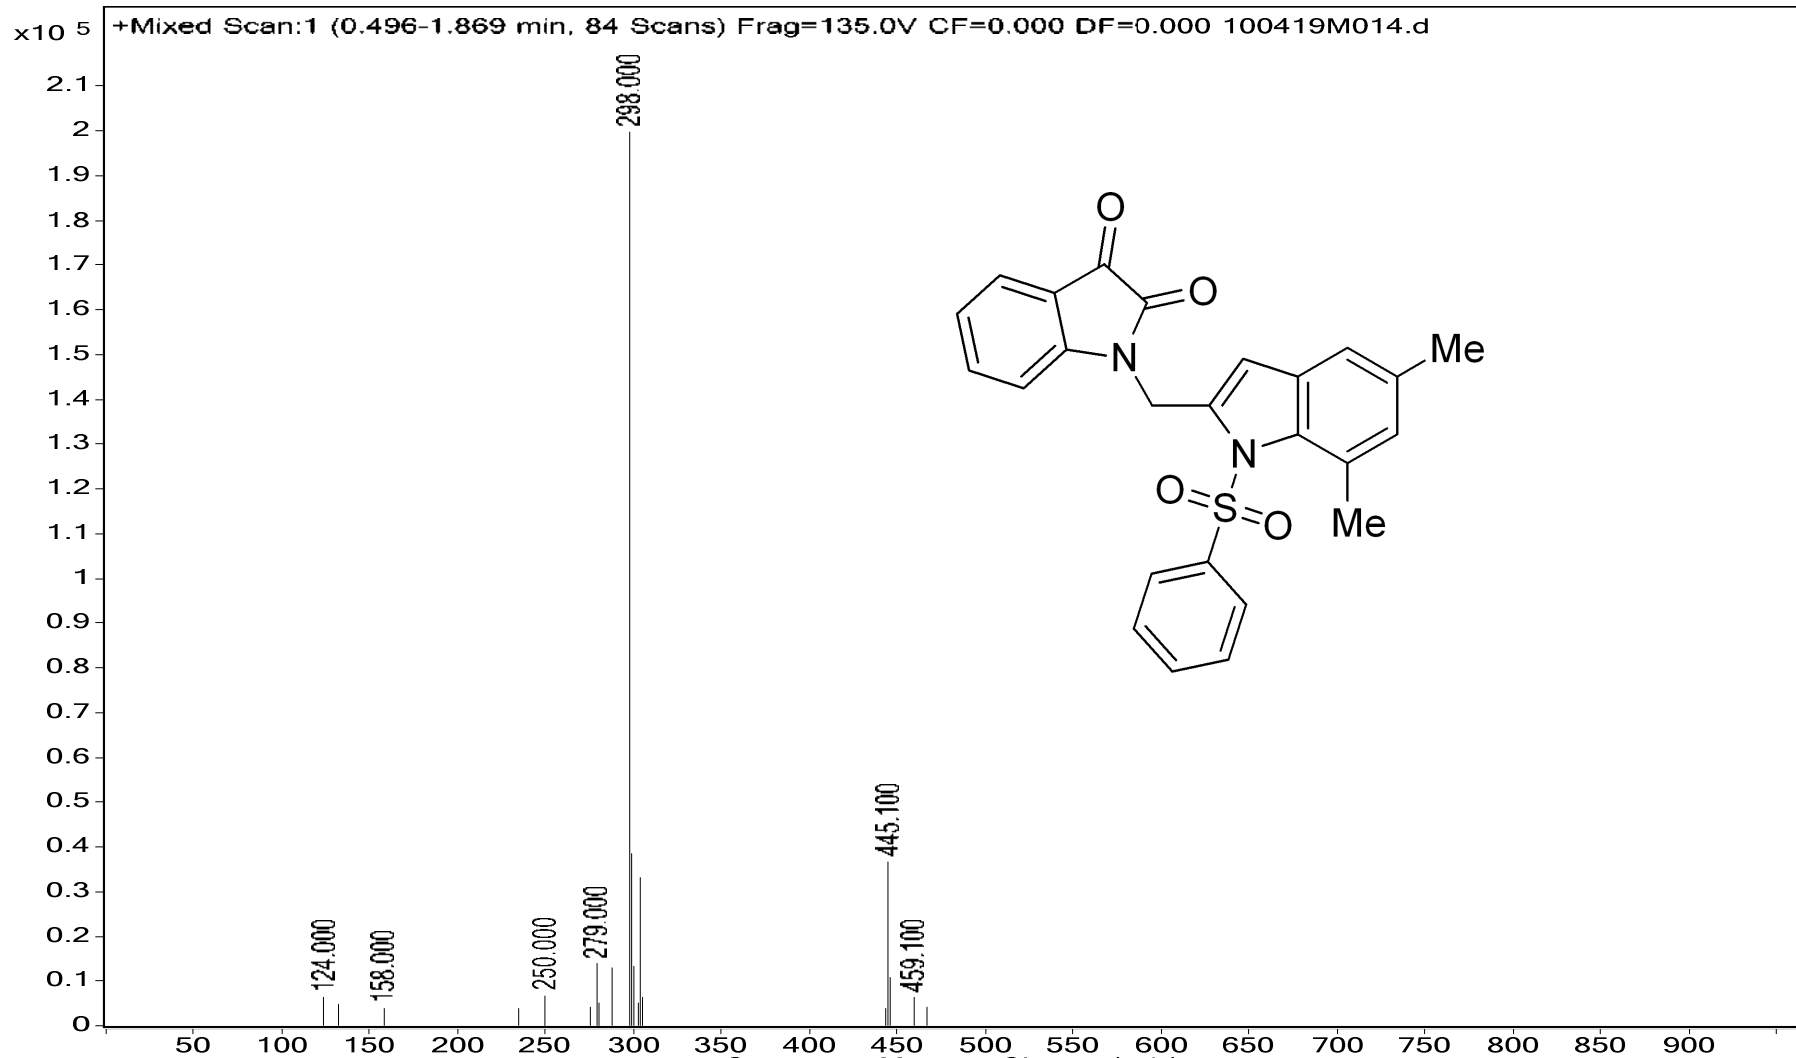

# Mass spectrum of compound 4a

|                      |                |                    |          |                        |          |                               |                       |
|----------------------|----------------|--------------------|----------|------------------------|----------|-------------------------------|-----------------------|
| <b>Sample Name</b>   | ILS-GSR-CI-Ts2 | <b>Position</b>    | Vial 45  | <b>Instrument Name</b> | LCMS     | <b>User Name</b>              |                       |
| <b>Inj Vol</b>       | 5              | <b>InjPosition</b> |          | <b>SampleType</b>      | Sample   | <b>IRM Calibration Status</b> | Not Applicable        |
| <b>Data Filename</b> | 270919M005A.d  | <b>ACQ Method</b>  | MMI-SM.m | <b>Comment</b>         | MM19I065 | <b>Acquired Time</b>          | 9/27/2019 11:17:01 AM |

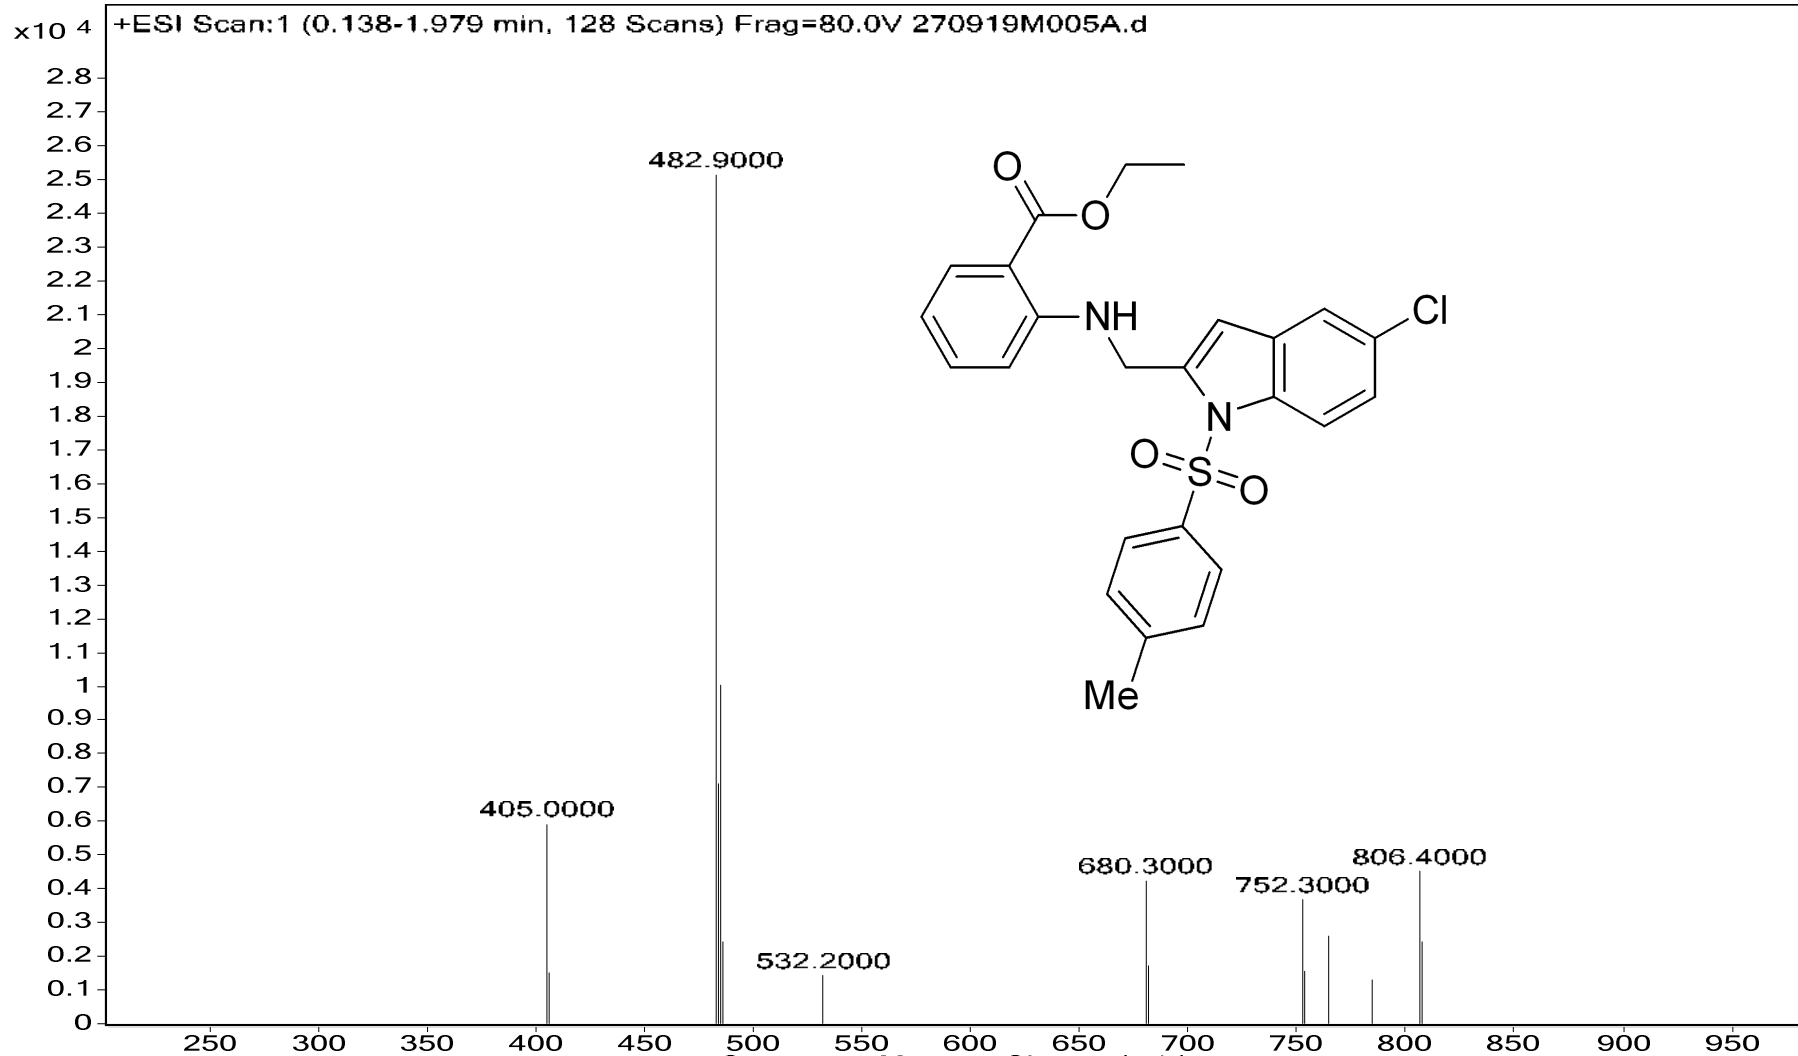



# Mass spectrum of compound 4b

|                      |              |                    |          |                        |          |                               |                       |
|----------------------|--------------|--------------------|----------|------------------------|----------|-------------------------------|-----------------------|
| <b>Sample Name</b>   | ILS-GSR-Br2  | <b>Position</b>    | Vial 43  | <b>Instrument Name</b> | LCMS     | <b>User Name</b>              |                       |
| <b>Inj Vol</b>       | 10           | <b>InjPosition</b> |          | <b>SampleType</b>      | Sample   | <b>IRM Calibration Status</b> | Not Applicable        |
| <b>Data Filename</b> | 270919M003.d | <b>ACQ Method</b>  | MMI-SM.m | <b>Comment</b>         | MM19I063 | <b>Acquired Time</b>          | 9/27/2019 11:07:54 AM |

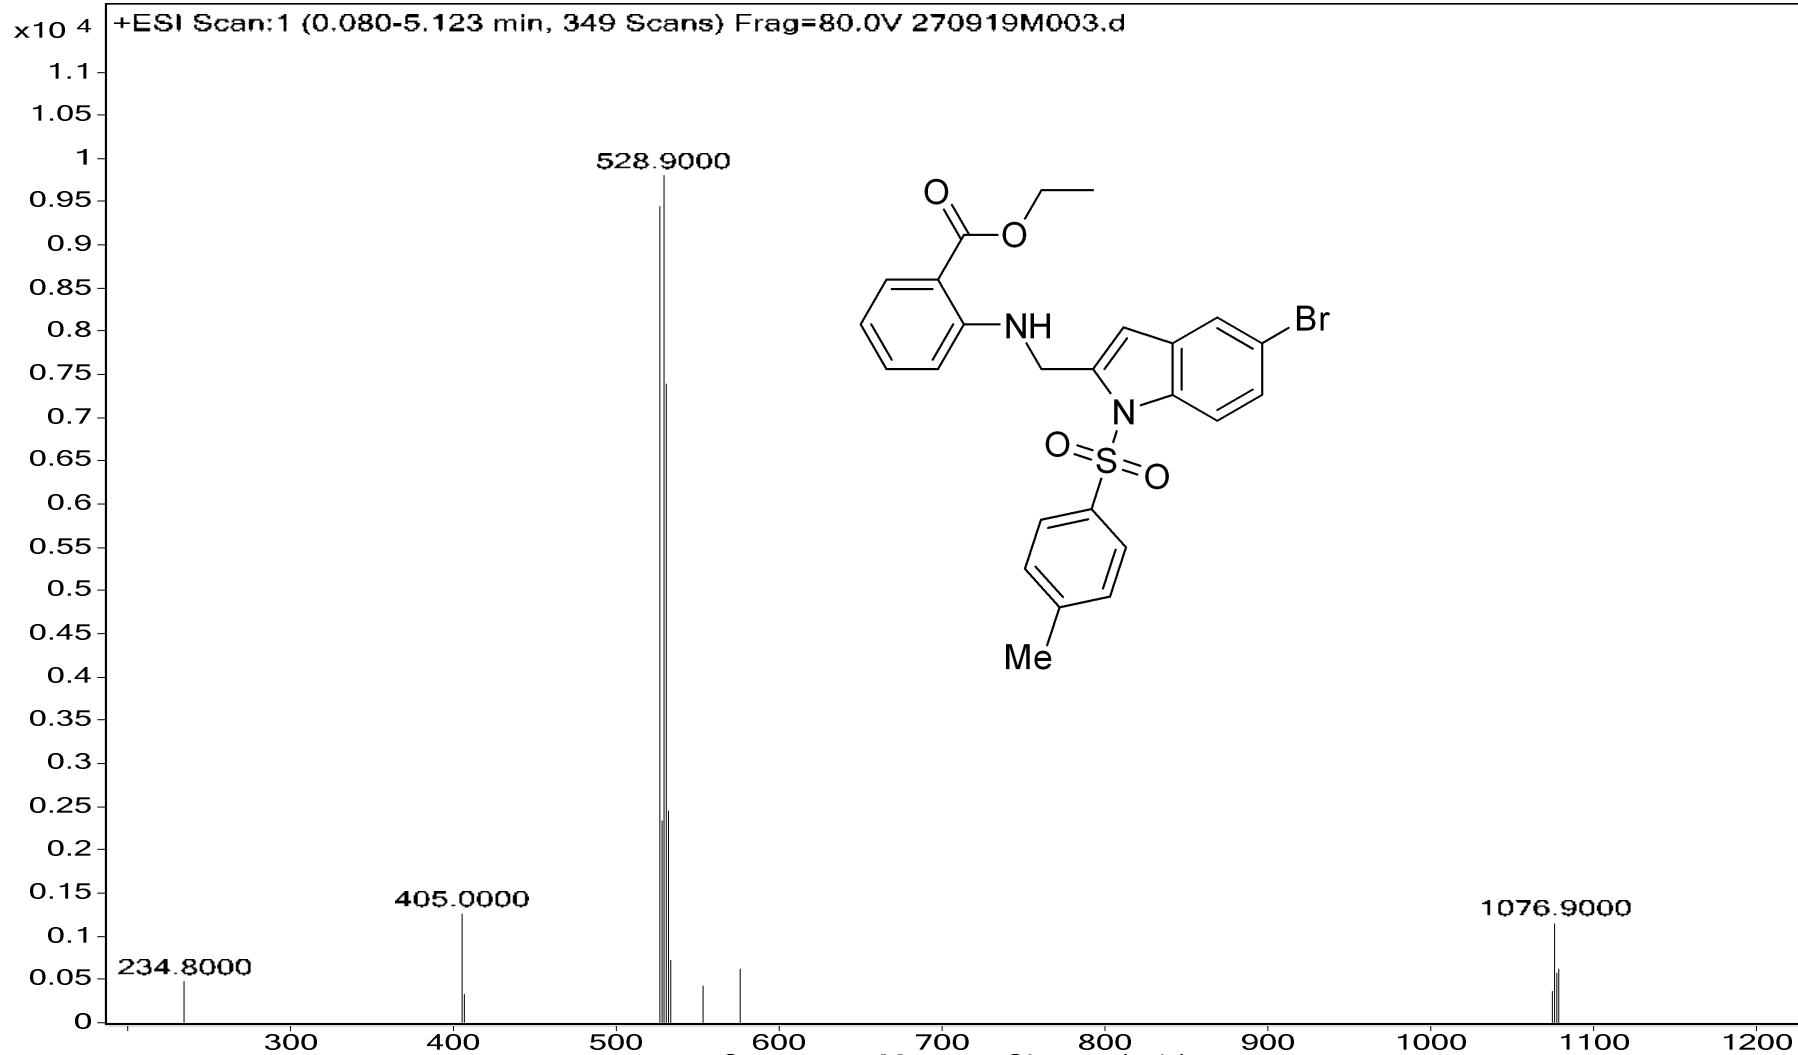

# Mass spectrum of compound 4c

|                      |               |                    |          |                        |          |                               |                      |
|----------------------|---------------|--------------------|----------|------------------------|----------|-------------------------------|----------------------|
| <b>Sample Name</b>   | ILS-GSR-I2-F2 | <b>Position</b>    | Vial 33  | <b>Instrument Name</b> | LCMS     | <b>User Name</b>              |                      |
| <b>Inj Vol</b>       | 5             | <b>InjPosition</b> |          | <b>SampleType</b>      | Sample   | <b>IRM Calibration Status</b> | Not Applicable       |
| <b>Data Filename</b> | 260919M018B.d | <b>ACQ Method</b>  | MMI-SM.m | <b>Comment</b>         | MM19I059 | <b>Acquired Time</b>          | 9/26/2019 4:10:50 PM |

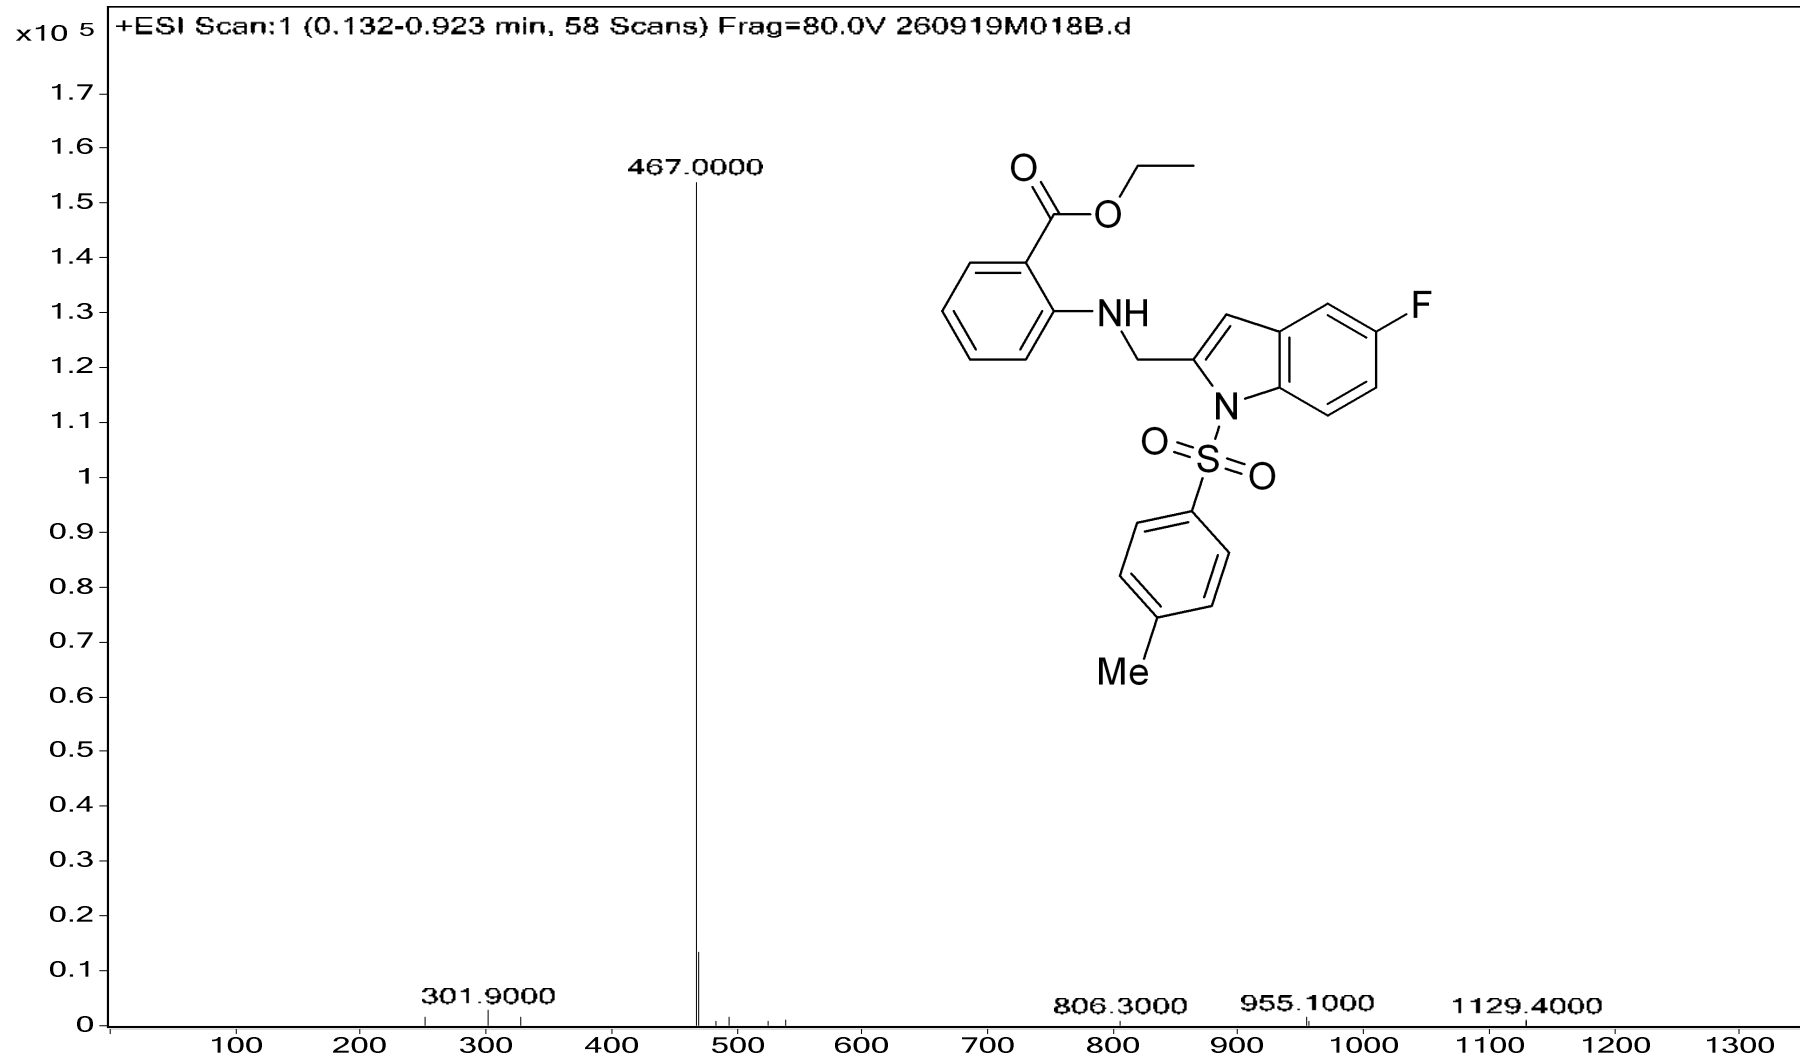

# Mass spectrum of compound 4d

|                      |              |                    |          |                        |          |                               |                       |
|----------------------|--------------|--------------------|----------|------------------------|----------|-------------------------------|-----------------------|
| <b>Sample Name</b>   | ILS-GSR-TS2  | <b>Position</b>    | Vial 42  | <b>Instrument Name</b> | LCMS     | <b>User Name</b>              |                       |
| <b>Inj Vol</b>       | 5            | <b>InjPosition</b> |          | <b>SampleType</b>      | Sample   | <b>IRM Calibration Status</b> | Not Applicable        |
| <b>Data Filename</b> | 270919M002.d | <b>ACQ Method</b>  | MMI-SM.m | <b>Comment</b>         | MM19I062 | <b>Acquired Time</b>          | 9/27/2019 10:46:13 AM |

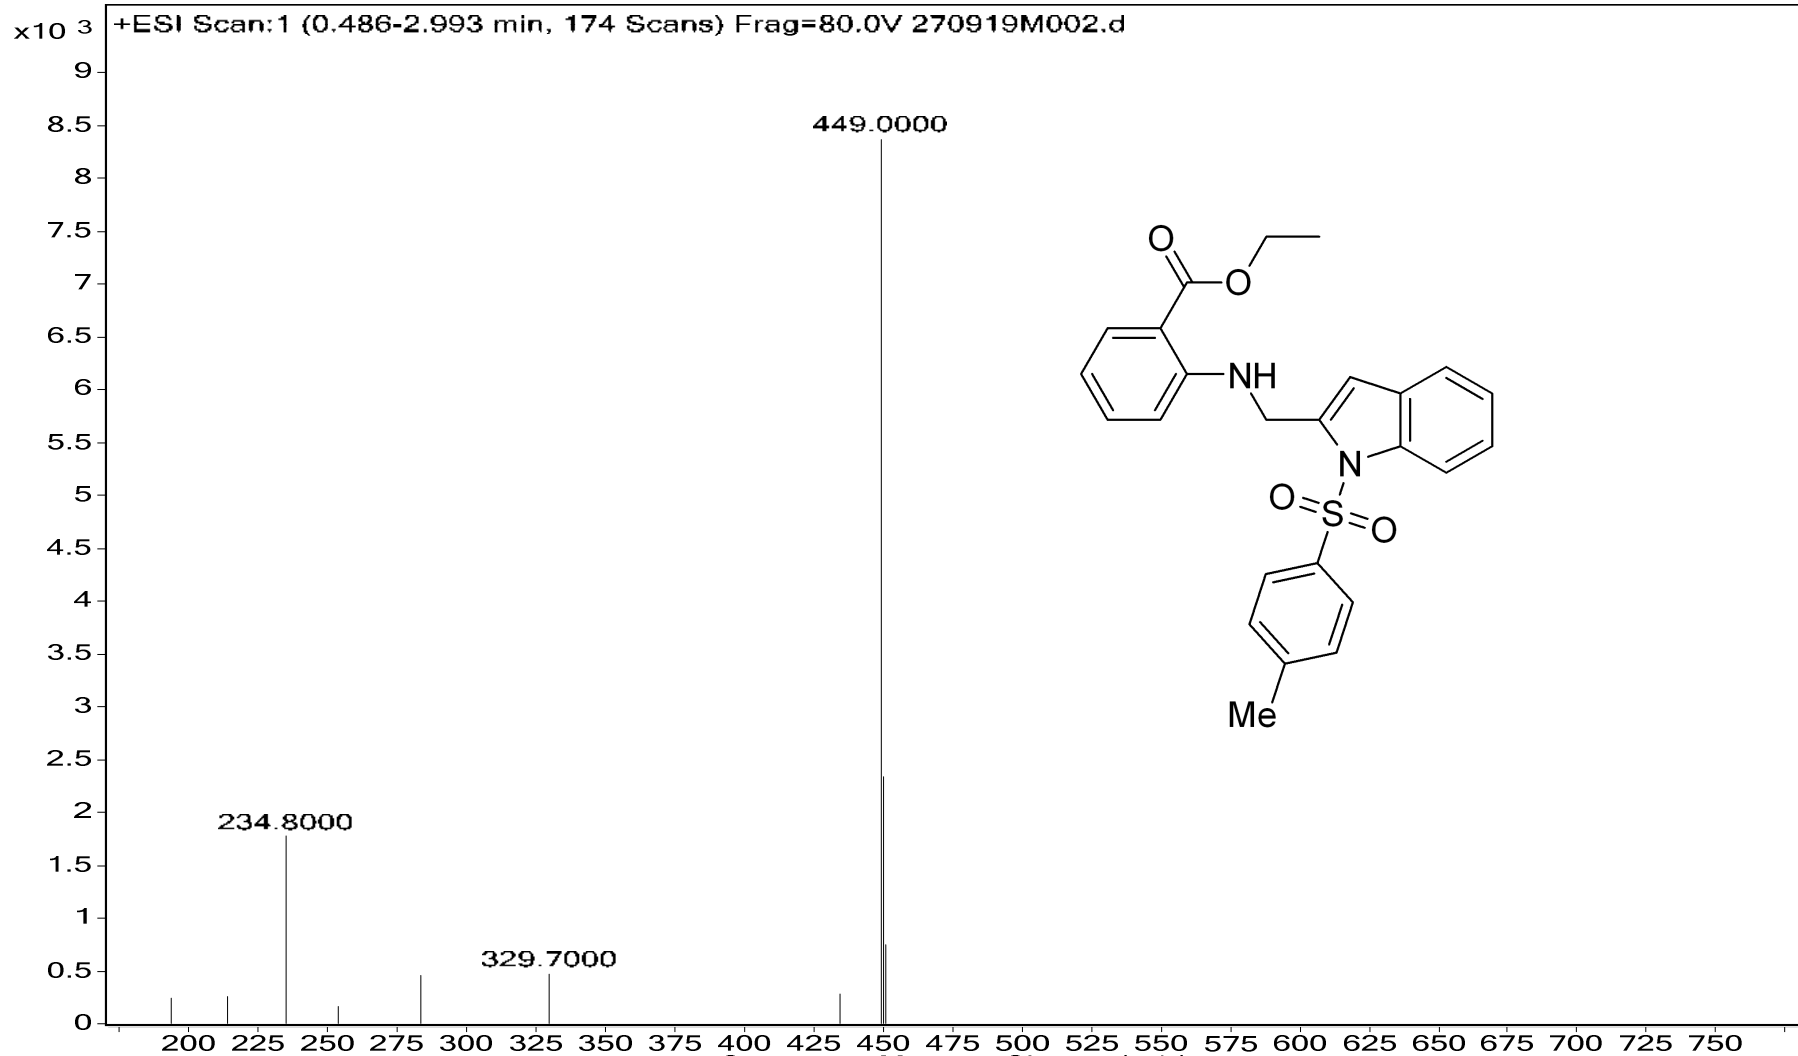

# Mass spectrum of compound 4e

|                      |                |                    |          |                        |          |                               |                       |
|----------------------|----------------|--------------------|----------|------------------------|----------|-------------------------------|-----------------------|
| <b>Sample Name</b>   | ILS-GSR-I2-CL2 | <b>Position</b>    | Vial 27  | <b>Instrument Name</b> | LCMS     | <b>User Name</b>              |                       |
| <b>Inj Vol</b>       | 2              | <b>InjPosition</b> |          | <b>SampleType</b>      | Sample   | <b>IRM Calibration Status</b> | Not Applicable        |
| <b>Data Filename</b> | 211118M039.d   | <b>ACQ Method</b>  | MMI-SM.m | <b>Comment</b>         | MM18K021 | <b>Acquired Time</b>          | 11/21/2018 4:11:41 PM |

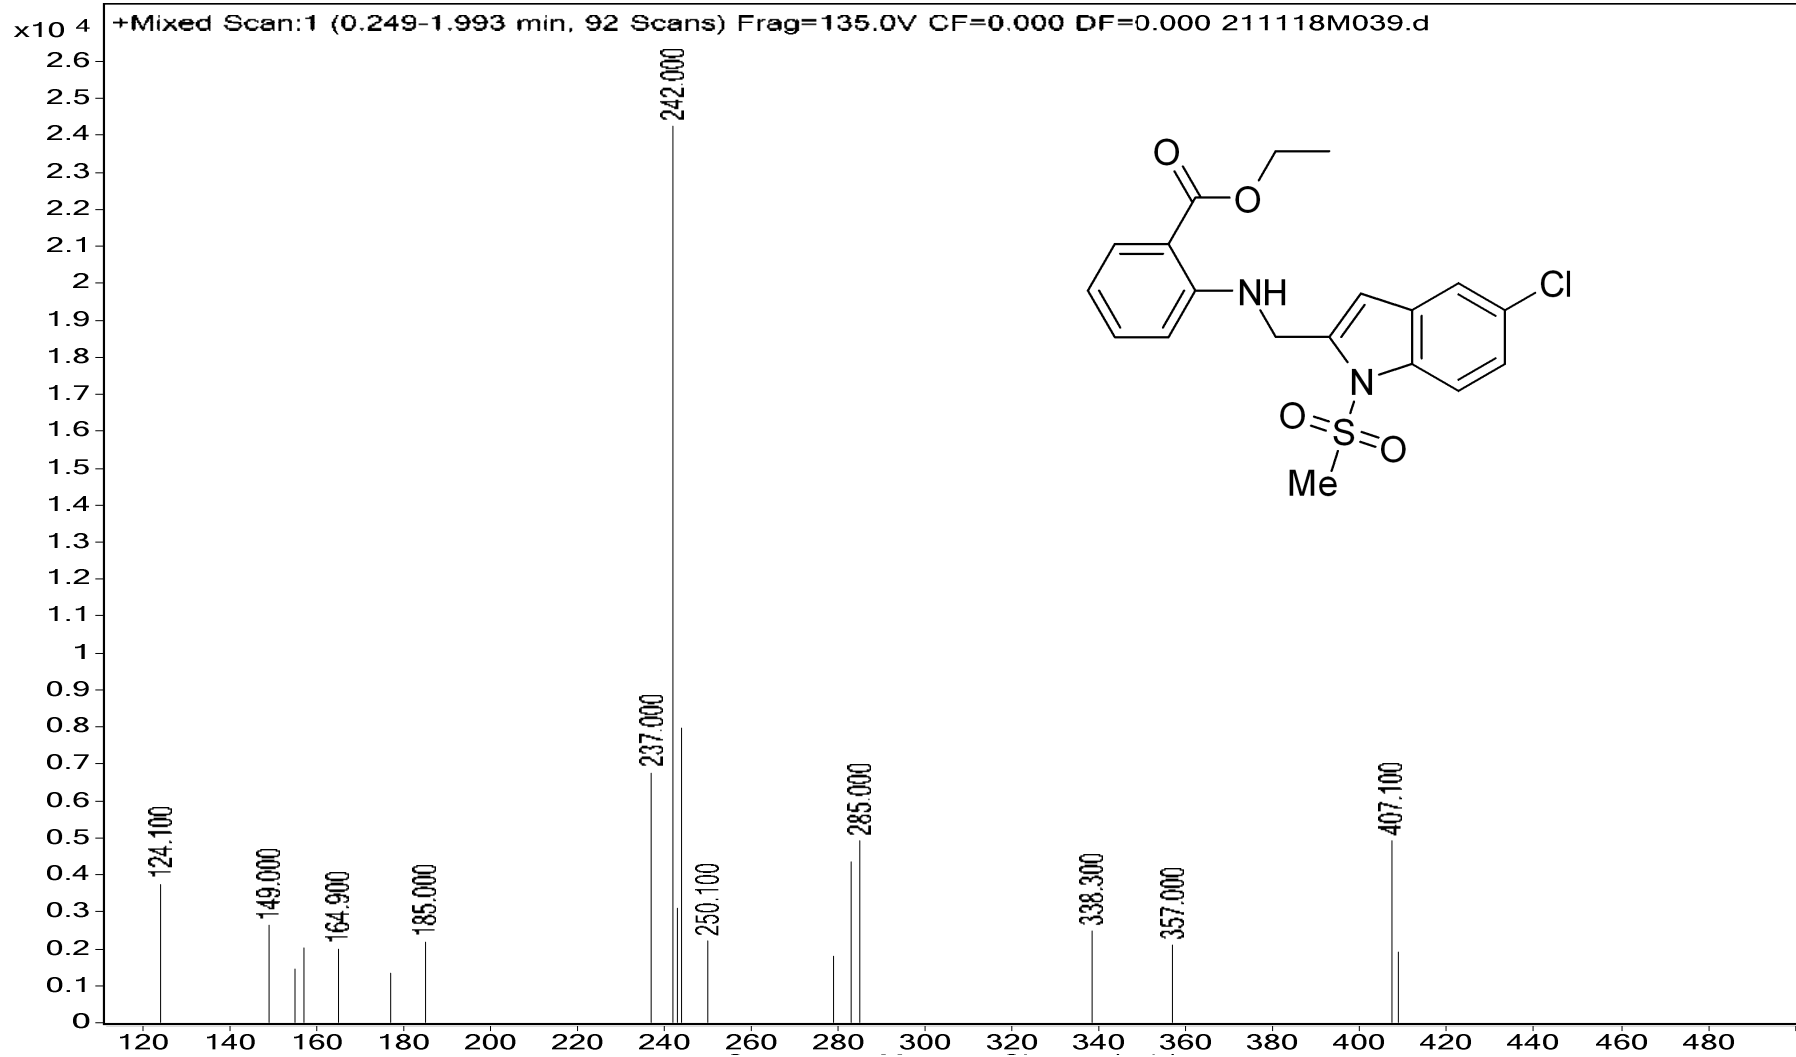

# Mass spectrum of compound 4f

|                      |               |                    |          |                        |          |                               |                       |
|----------------------|---------------|--------------------|----------|------------------------|----------|-------------------------------|-----------------------|
| <b>Sample Name</b>   | ILS-GSR-Ben2  | <b>Position</b>    | Vial 44  | <b>Instrument Name</b> | LCMS     | <b>User Name</b>              |                       |
| <b>Inj Vol</b>       | 5             | <b>InjPosition</b> |          | <b>SampleType</b>      | Sample   | <b>IRM Calibration Status</b> | Not Applicable        |
| <b>Data Filename</b> | 270919M004A.d | <b>ACQ Method</b>  | MMI-SM.m | <b>Comment</b>         | MM19I064 | <b>Acquired Time</b>          | 9/27/2019 11:10:00 AM |

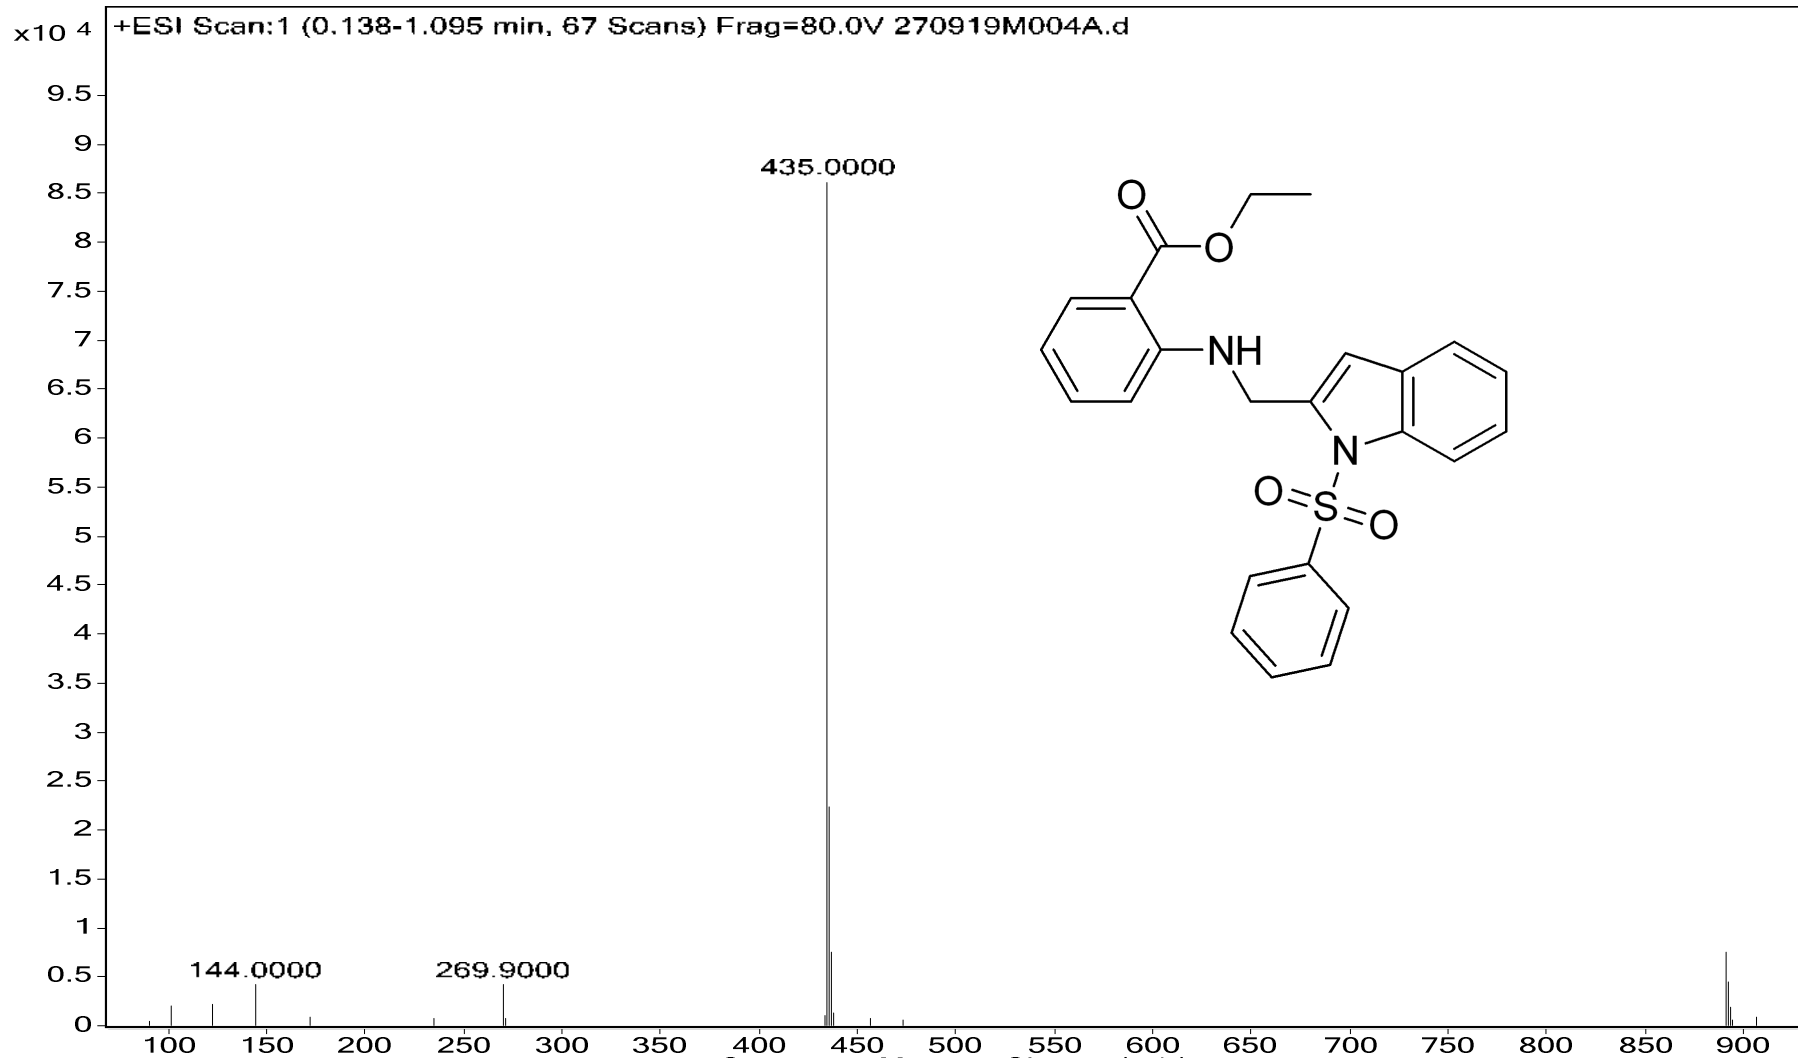

# Mass spectrum of compound 4g

|                      |                |                    |          |                        |          |                               |                       |
|----------------------|----------------|--------------------|----------|------------------------|----------|-------------------------------|-----------------------|
| <b>Sample Name</b>   | ILS-GSR-I2-Th2 | <b>Position</b>    | Vial 10  | <b>Instrument Name</b> | LCMS     | <b>User Name</b>              |                       |
| <b>Inj Vol</b>       | 3              | <b>InjPosition</b> |          | <b>SampleType</b>      | Sample   | <b>IRM Calibration Status</b> | Not Applicable        |
| <b>Data Filename</b> | 171019M011.d   | <b>ACQ Method</b>  | MMI-SM.m | <b>Comment</b>         | MM19J032 | <b>Acquired Time</b>          | 10/17/2019 1:36:25 PM |

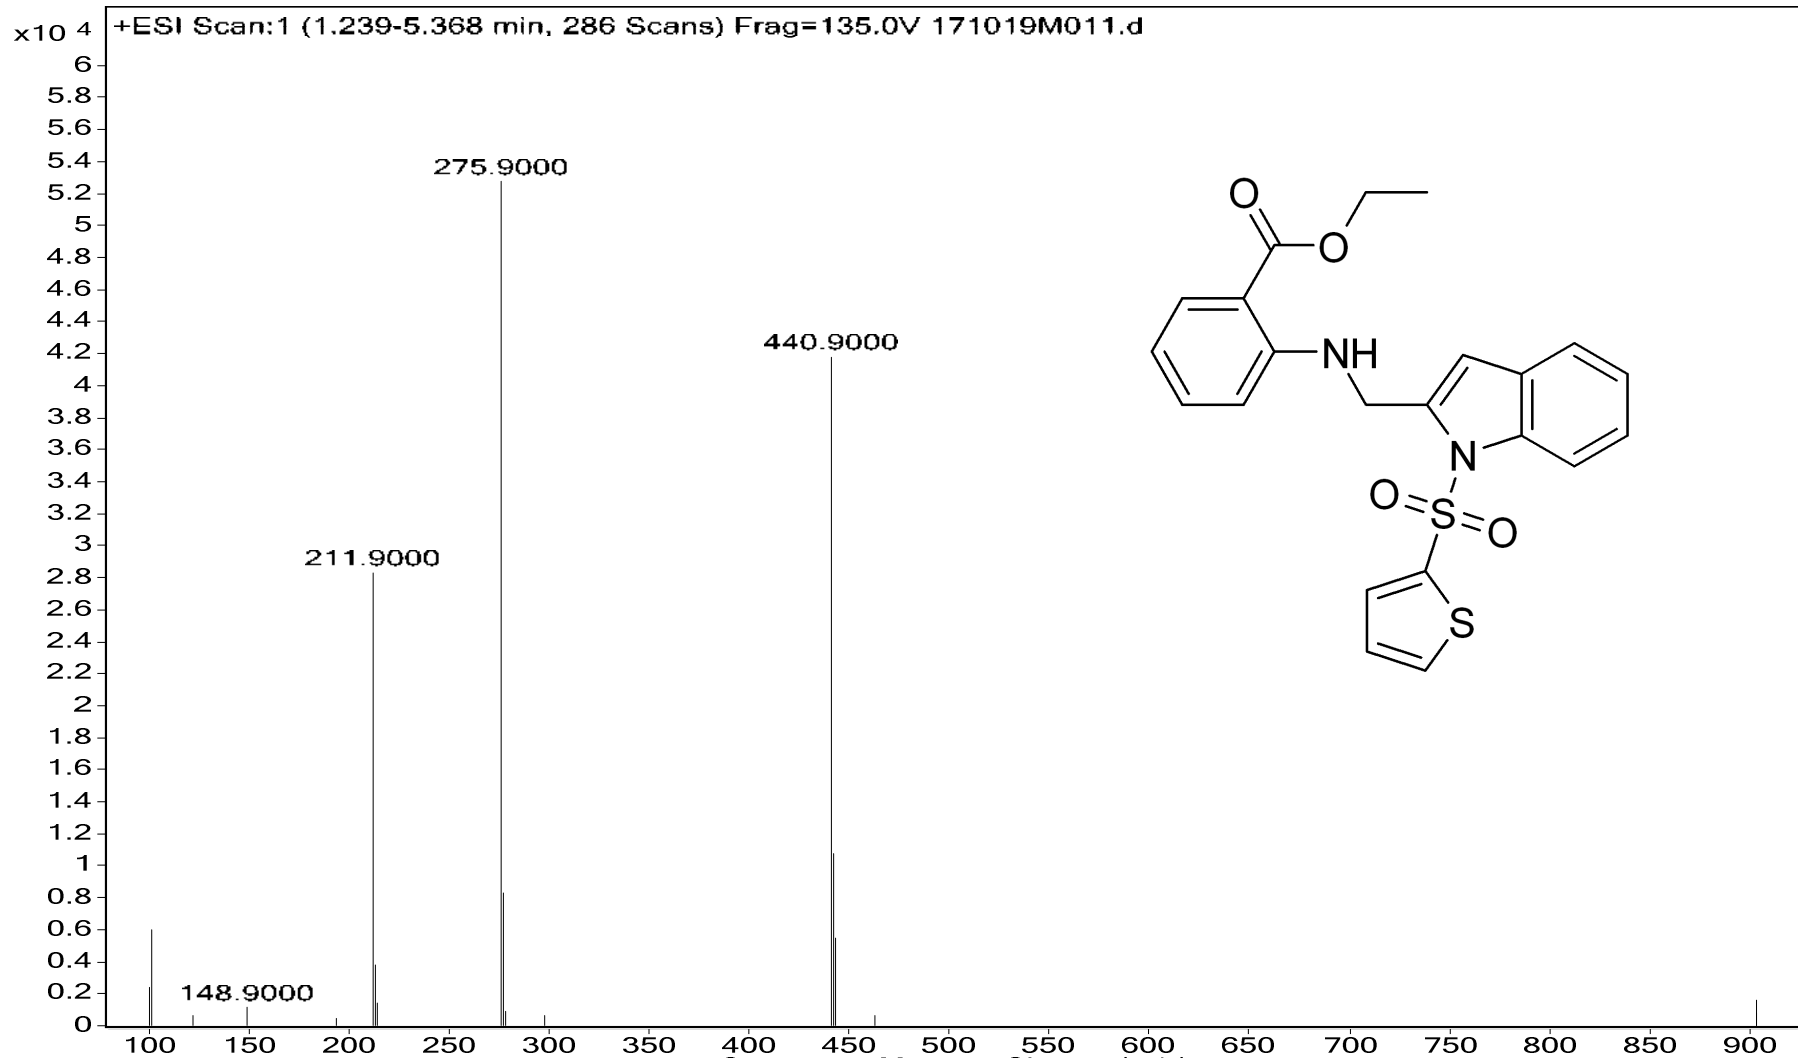

# Mass spectrum of compound 4h

|                      |                |                    |          |                        |          |                               |                      |
|----------------------|----------------|--------------------|----------|------------------------|----------|-------------------------------|----------------------|
| <b>Sample Name</b>   | ILS-GSR-I2-MS2 | <b>Position</b>    | Vial 39  | <b>Instrument Name</b> | LCMS     | <b>User Name</b>              |                      |
| <b>Inj Vol</b>       | 3              | <b>InjPosition</b> |          | <b>SampleType</b>      | Sample   | <b>IRM Calibration Status</b> | Not Applicable       |
| <b>Data Filename</b> | 041119M015.d   | <b>ACQ Method</b>  | MMI-SM.m | <b>Comment</b>         | MM19K007 | <b>Acquired Time</b>          | 11/4/2019 4:11:01 PM |

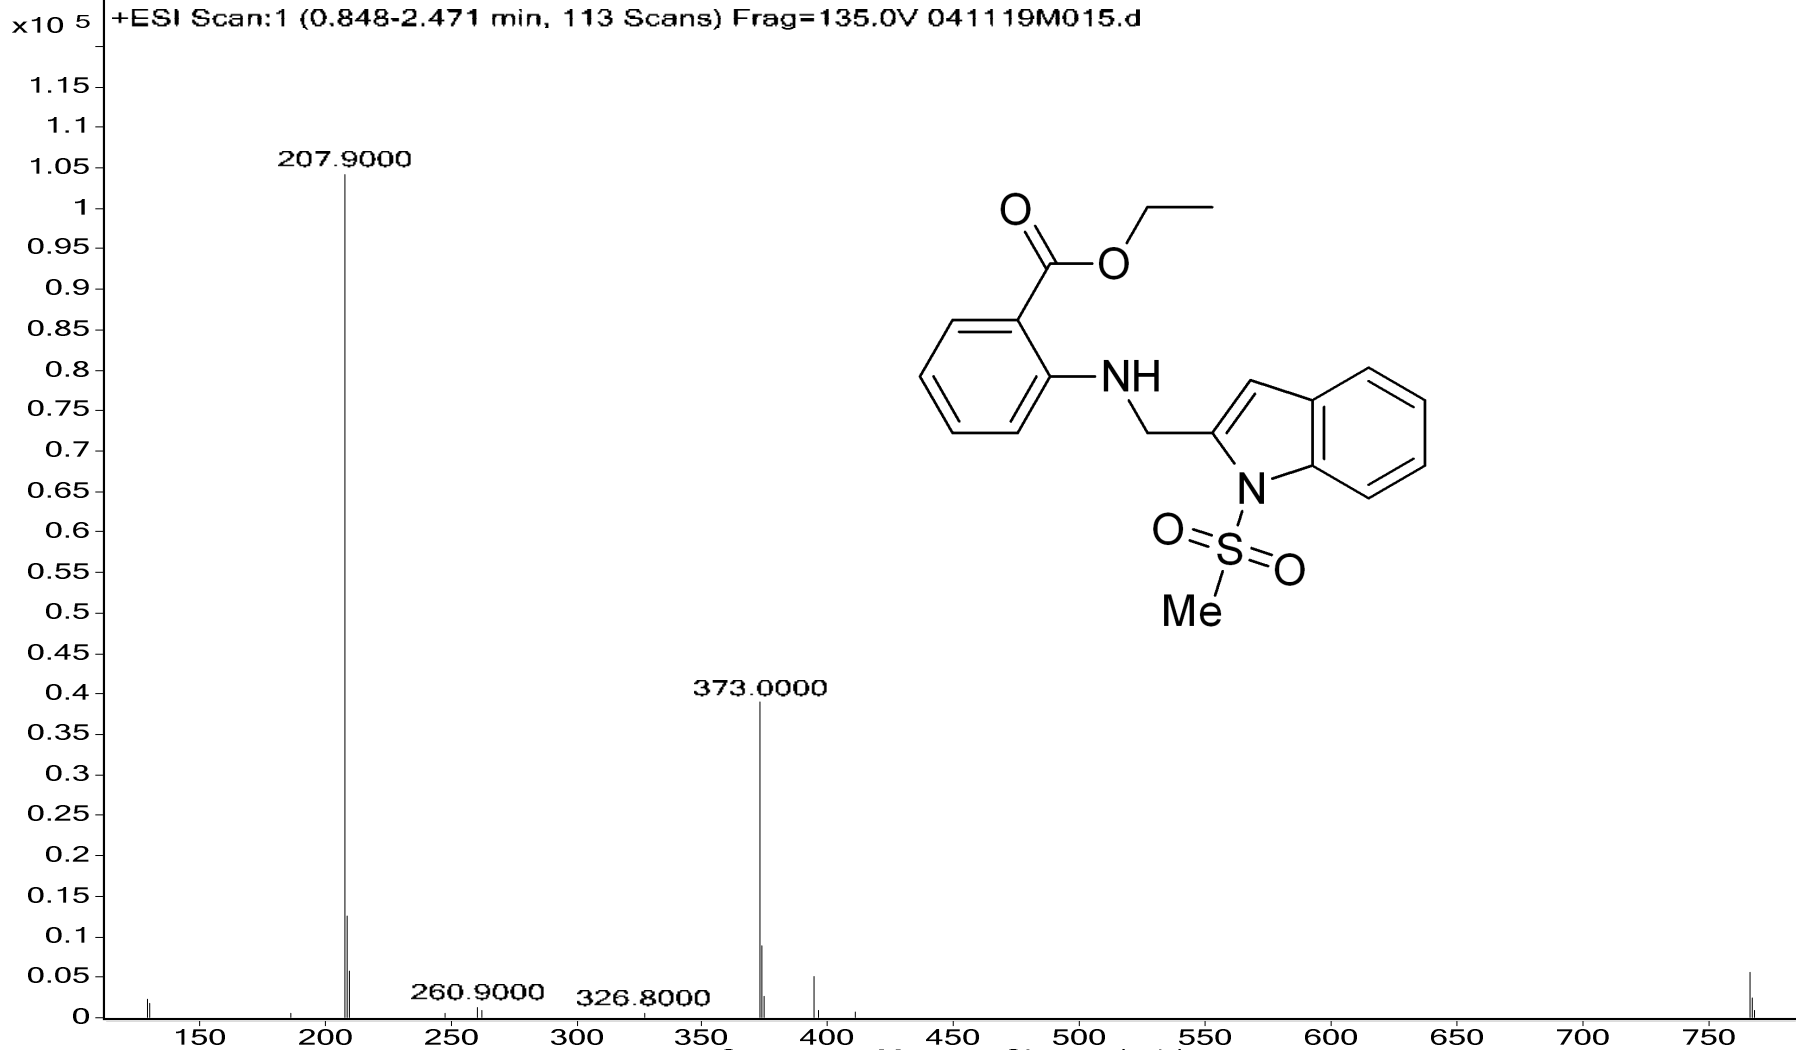

# Mass spectrum of compound 4i

|                      |                  |                    |          |                        |          |                               |                        |
|----------------------|------------------|--------------------|----------|------------------------|----------|-------------------------------|------------------------|
| <b>Sample Name</b>   | ILS-GSR-I2-MS-Me | <b>Position</b>    | Vial 9   | <b>Instrument Name</b> | LCMS     | <b>User Name</b>              |                        |
| <b>Inj Vol</b>       | 3                | <b>InjPosition</b> |          | <b>SampleType</b>      | Sample   | <b>IRM Calibration Status</b> | Not Applicable         |
| <b>Data Filename</b> | 211019M006.d     | <b>ACQ Method</b>  | MMI-SM.m | <b>Comment</b>         | MM19J037 | <b>Acquired Time</b>          | 10/21/2019 12:40:12 PM |

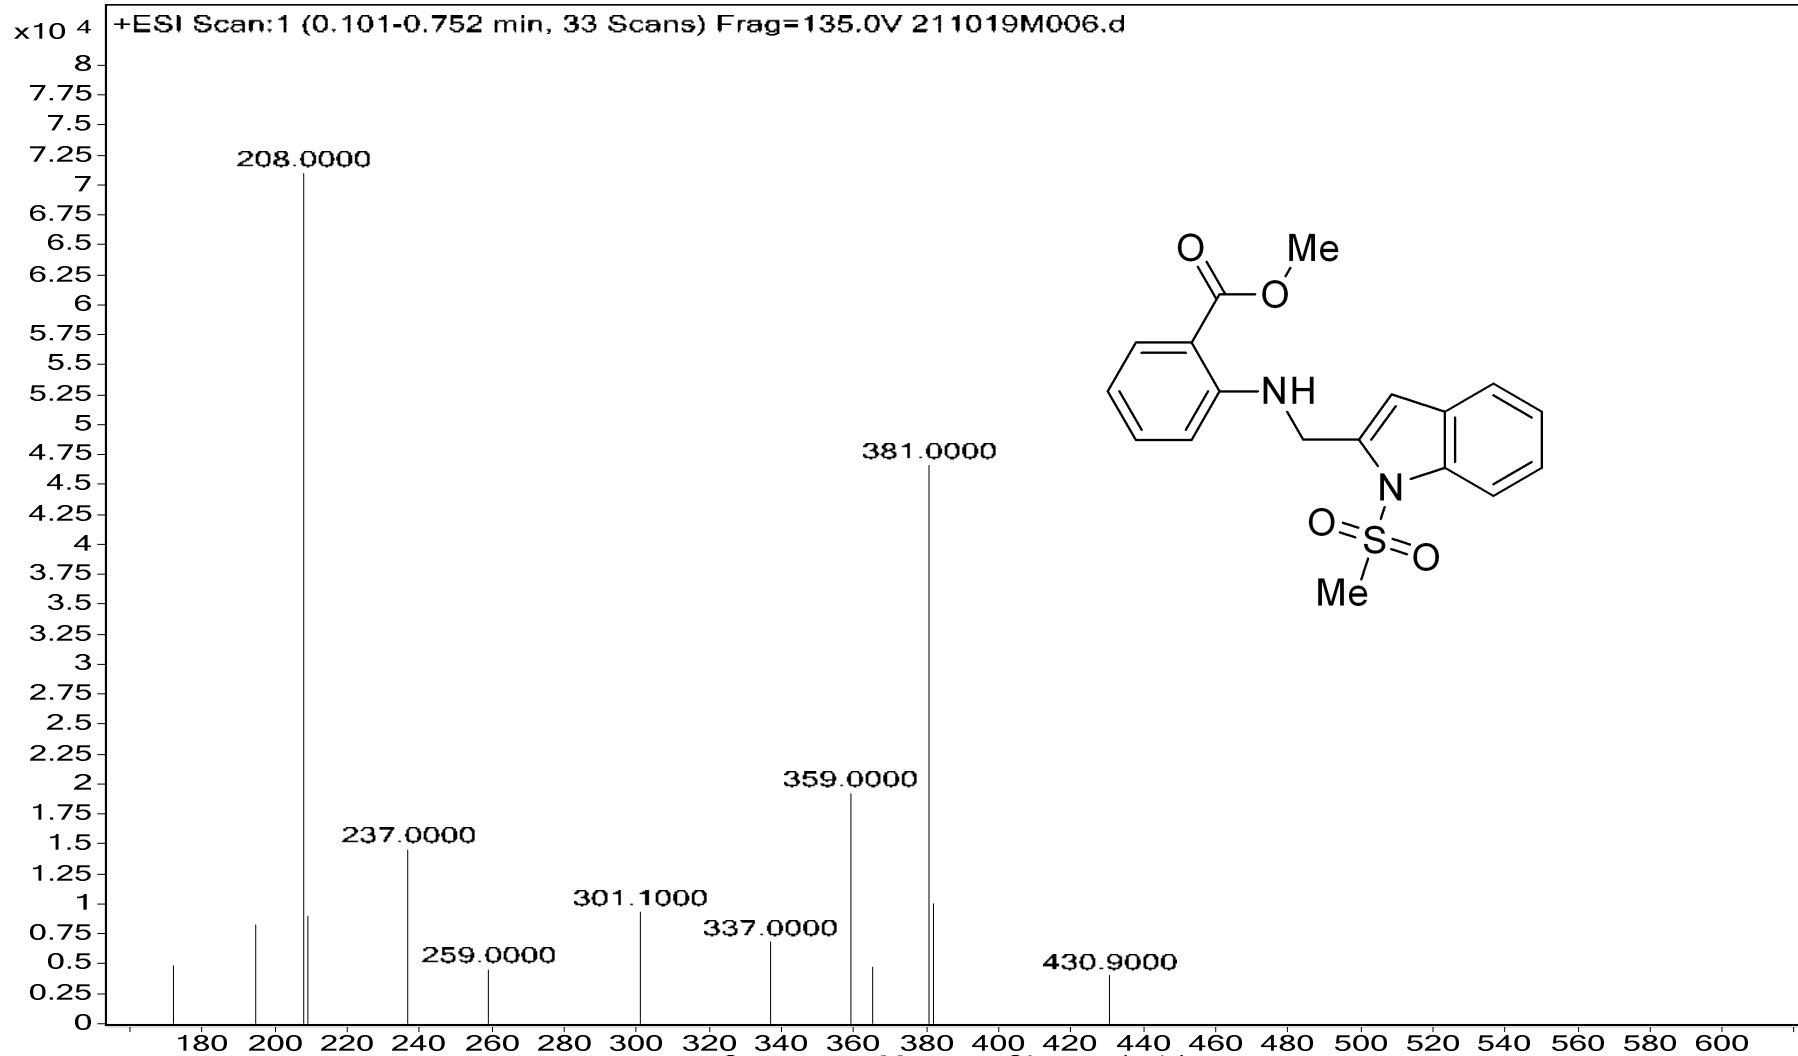



# Mass spectrum of compound 4j

|                      |                  |                    |          |                        |          |                               |                       |
|----------------------|------------------|--------------------|----------|------------------------|----------|-------------------------------|-----------------------|
| <b>Sample Name</b>   | ILS-GSR-I2-Cl-Me | <b>Position</b>    | Vial 59  | <b>Instrument Name</b> | LCMS     | <b>User Name</b>              |                       |
| <b>Inj Vol</b>       | 3                | <b>InjPosition</b> |          | <b>SampleType</b>      | Sample   | <b>IRM Calibration Status</b> | Not Applicable        |
| <b>Data Filename</b> | 291019M021.d     | <b>ACQ Method</b>  | MMI-SM.m | <b>Comment</b>         | MM19J058 | <b>Acquired Time</b>          | 10/29/2019 4:03:21 PM |

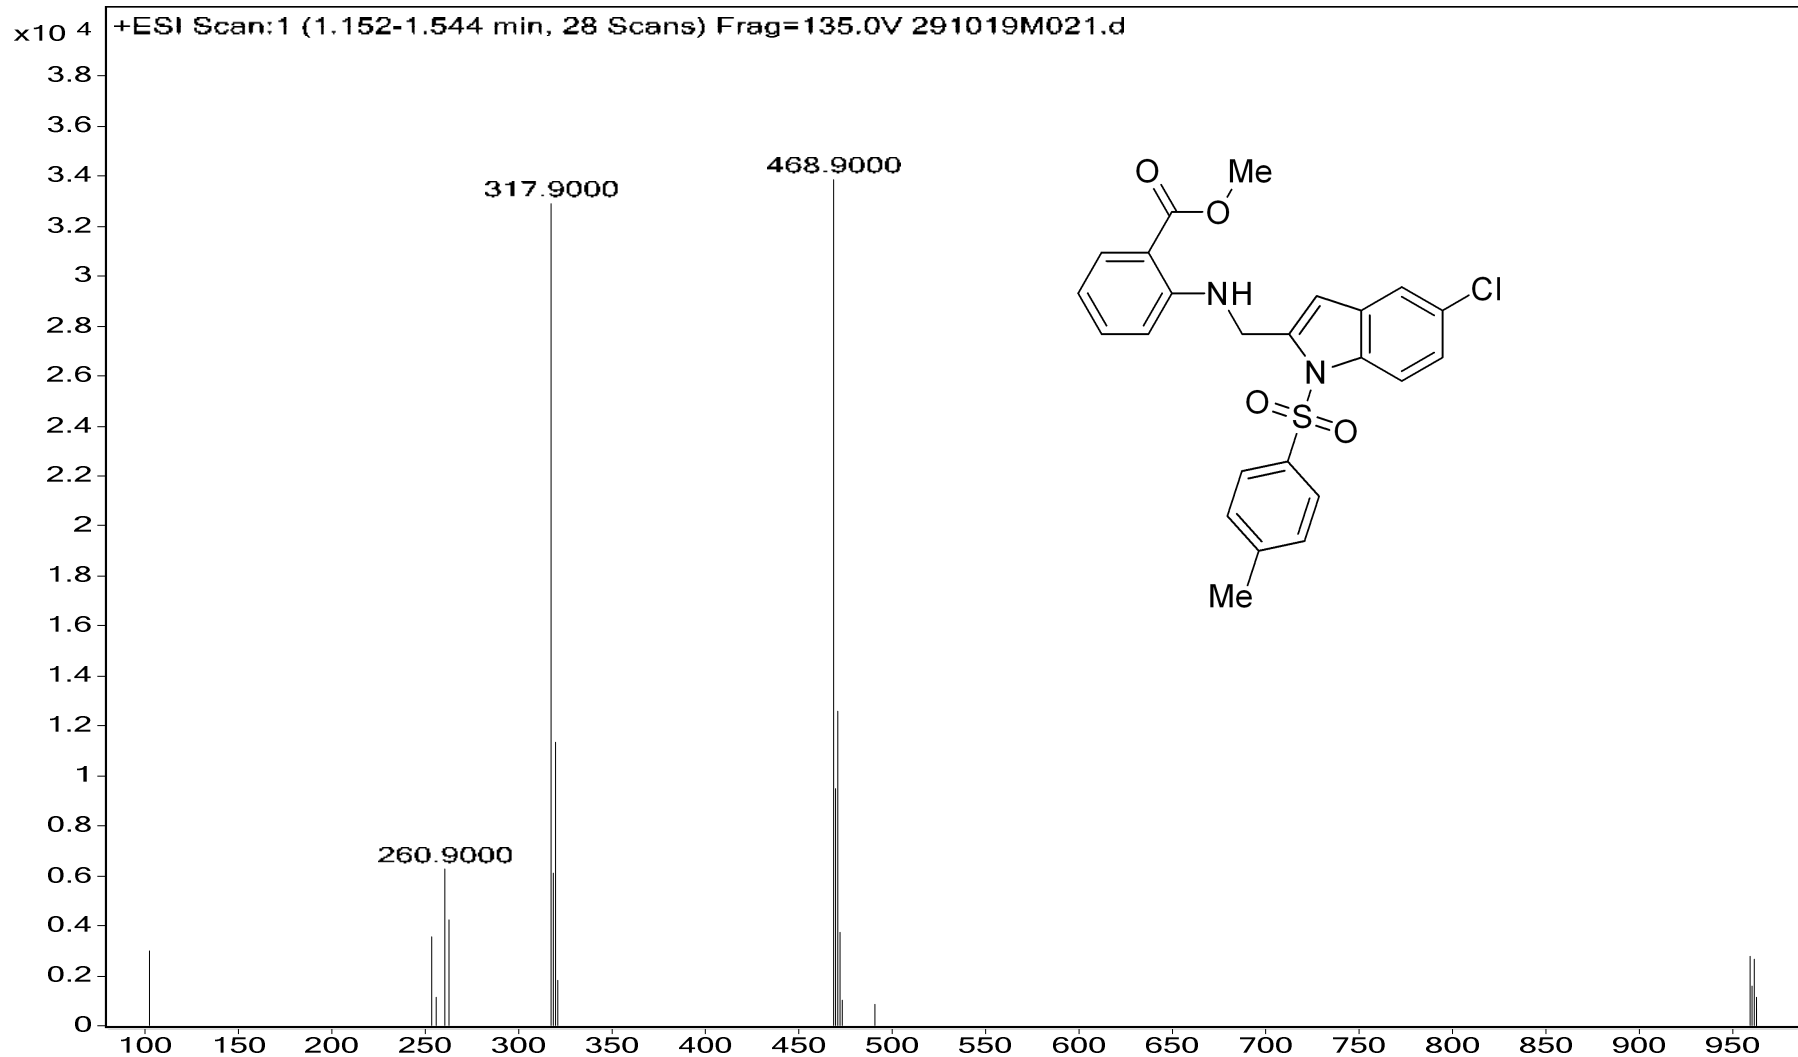

# Mass spectrum of compound 5a

|                      |              |                    |          |                        |          |                               |                     |
|----------------------|--------------|--------------------|----------|------------------------|----------|-------------------------------|---------------------|
| <b>Sample Name</b>   | ILS-GSR-Z-TS | <b>Position</b>    | Vial 30  | <b>Instrument Name</b> | LCMS     | <b>User Name</b>              |                     |
| <b>Inj Vol</b>       | 3            | <b>InjPosition</b> |          | <b>SampleType</b>      | Sample   | <b>IRM Calibration Status</b> | Not Applicable      |
| <b>Data Filename</b> | 050419M012.d | <b>ACQ Method</b>  | MMI-SM.m | <b>Comment</b>         | MM19D006 | <b>Acquired Time</b>          | 4/5/2019 3:57:09 PM |

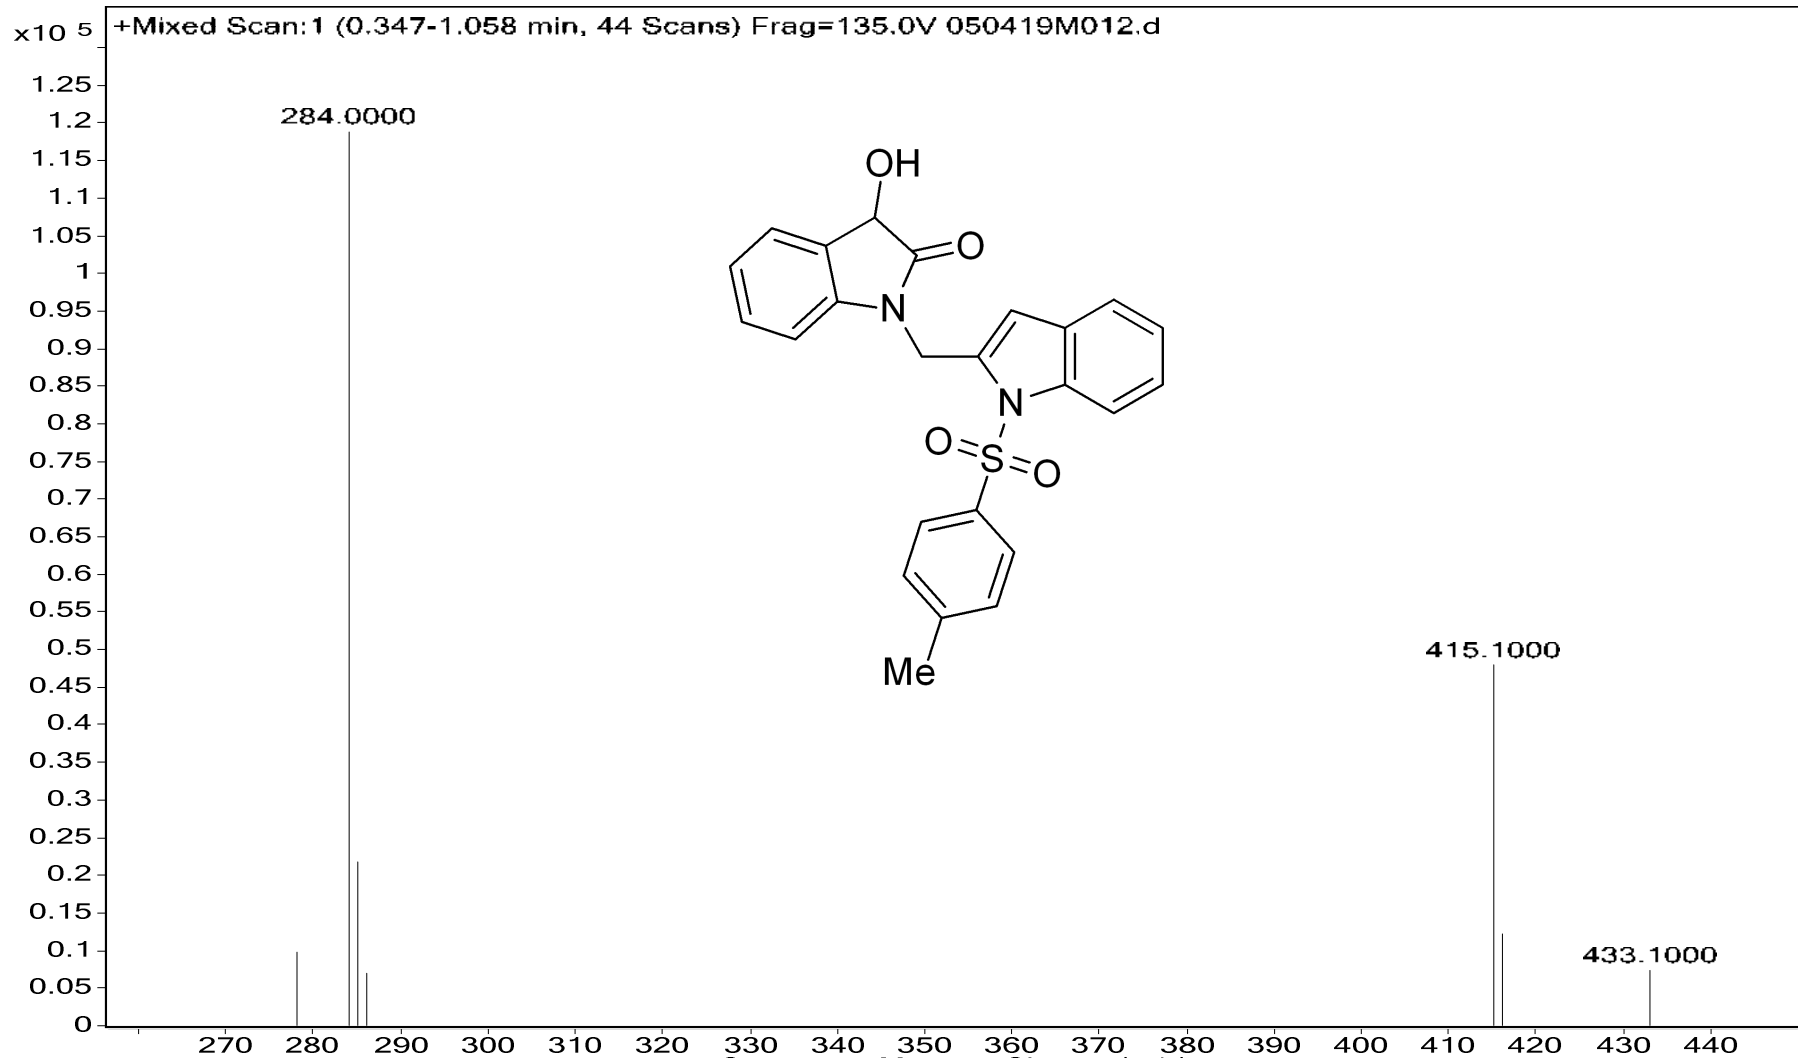

# Mass spectrum of compound 5b

|                      |               |                    |          |                        |          |                               |                     |
|----------------------|---------------|--------------------|----------|------------------------|----------|-------------------------------|---------------------|
| <b>Sample Name</b>   | ILS-GSR-Z-Ben | <b>Position</b>    | Vial 25  | <b>Instrument Name</b> | LCMS     | <b>User Name</b>              |                     |
| <b>Inj Vol</b>       | 4             | <b>InjPosition</b> |          | <b>SampleType</b>      | Sample   | <b>IRM Calibration Status</b> | Not Applicable      |
| <b>Data Filename</b> | 020419M008.d  | <b>ACQ Method</b>  | MMI-SM.m | <b>Comment</b>         | MM19D001 | <b>Acquired Time</b>          | 4/2/2019 1:05:12 PM |

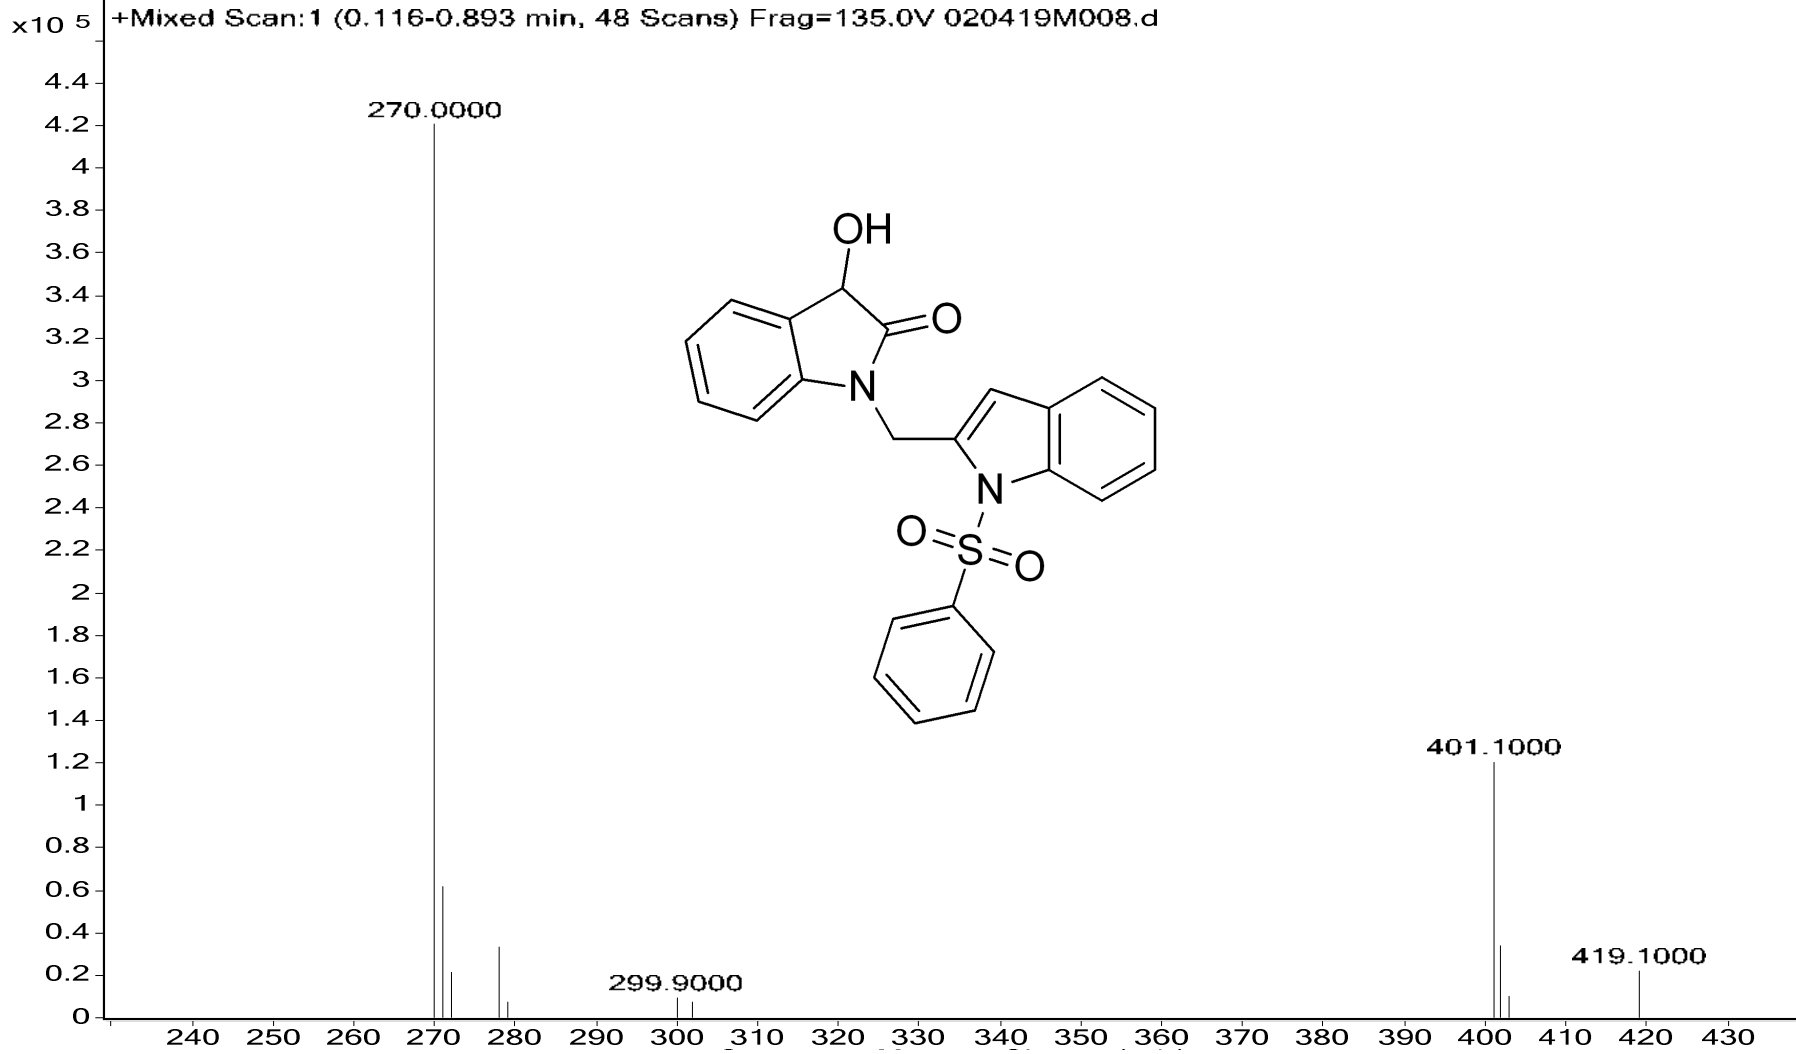

# Mass spectrum of compound 5c

|                      |              |                    |          |                        |          |                               |                      |
|----------------------|--------------|--------------------|----------|------------------------|----------|-------------------------------|----------------------|
| <b>Sample Name</b>   | ILS-GSR-Z-MS | <b>Position</b>    | Vial 49  | <b>Instrument Name</b> | LCMS     | <b>User Name</b>              |                      |
| <b>Inj Vol</b>       | 10           | <b>InjPosition</b> |          | <b>SampleType</b>      | Sample   | <b>IRM Calibration Status</b> | Not Applicable       |
| <b>Data Filename</b> | 280319M016.d | <b>ACQ Method</b>  | MMI-SM.m | <b>Comment</b>         | MM19C036 | <b>Acquired Time</b>          | 3/28/2019 6:19:58 PM |

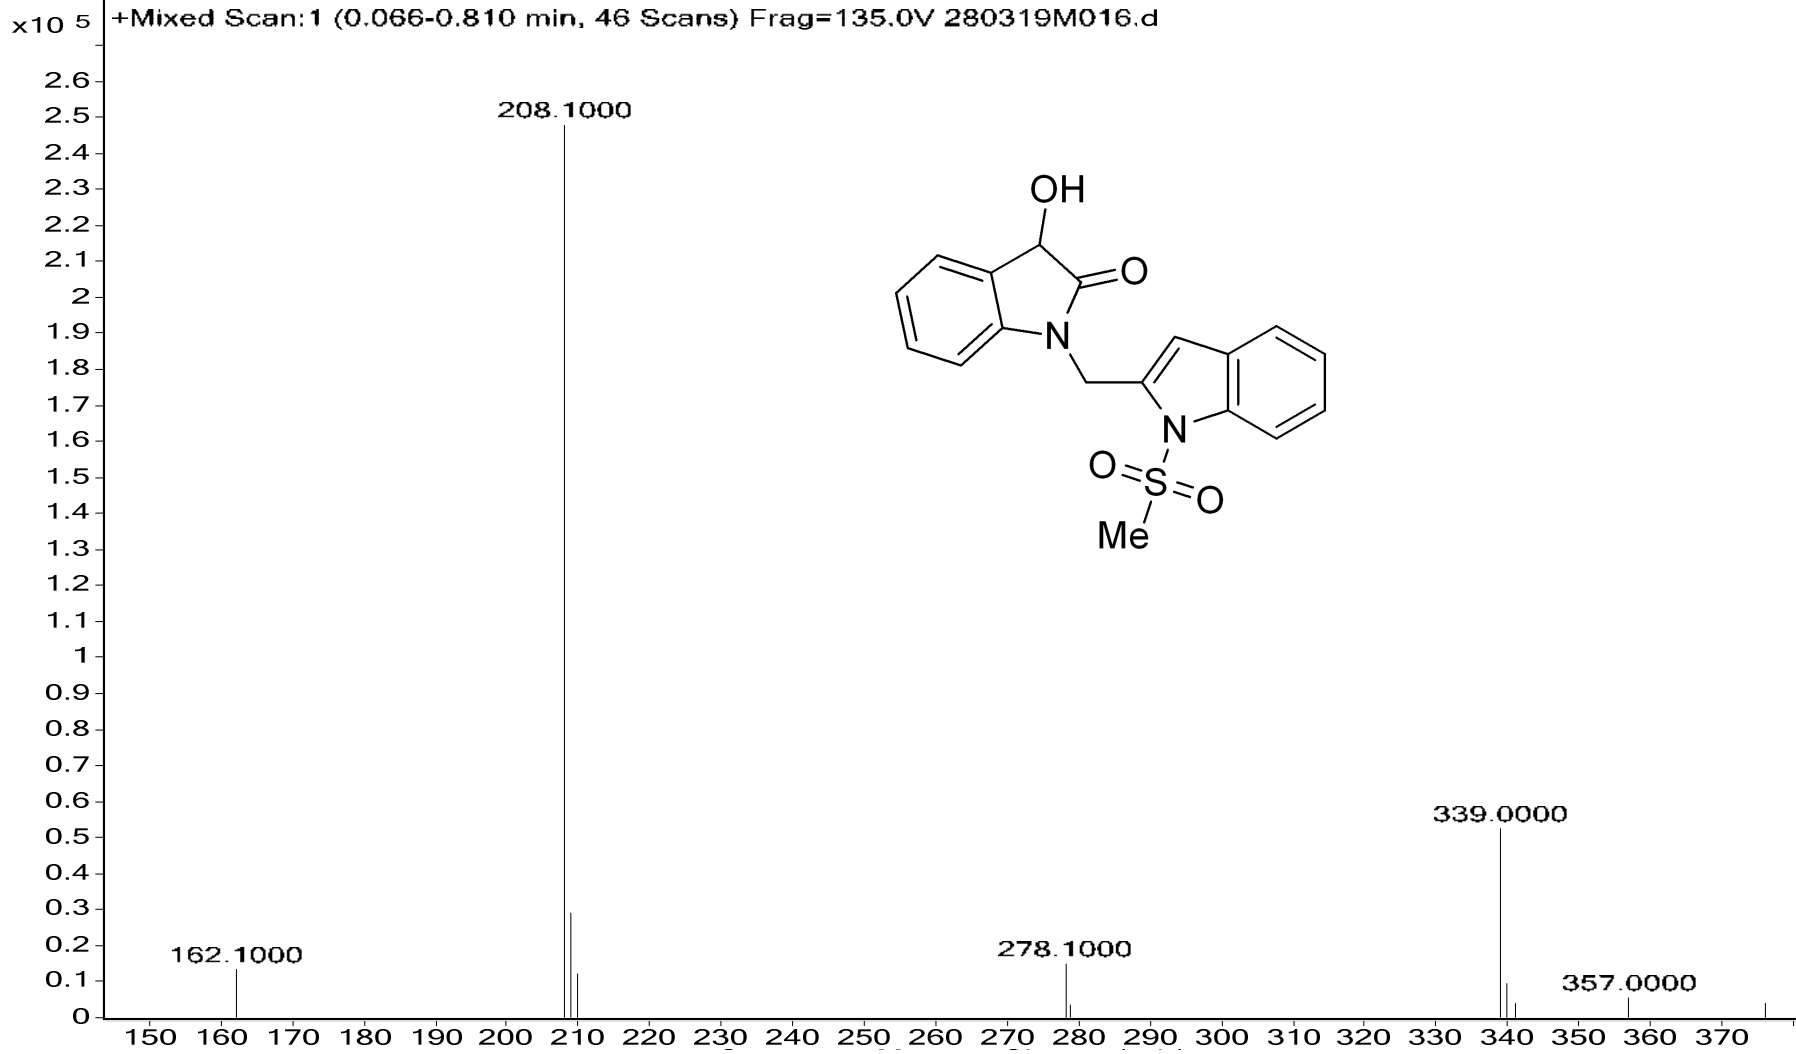

# Mass spectrum of compound 5d

|                      |               |                    |          |                        |          |                               |                     |
|----------------------|---------------|--------------------|----------|------------------------|----------|-------------------------------|---------------------|
| <b>Sample Name</b>   | ILS-GSR-Z-DTS | <b>Position</b>    | Vial 17  | <b>Instrument Name</b> | LCMS     | <b>User Name</b>              |                     |
| <b>Inj Vol</b>       | 4             | <b>InjPosition</b> |          | <b>SampleType</b>      | Sample   | <b>IRM Calibration Status</b> | Not Applicable      |
| <b>Data Filename</b> | 040419M007.d  | <b>ACQ Method</b>  | MMI-SM.m | <b>Comment</b>         | MA19D004 | <b>Acquired Time</b>          | 4/4/2019 3:52:49 PM |

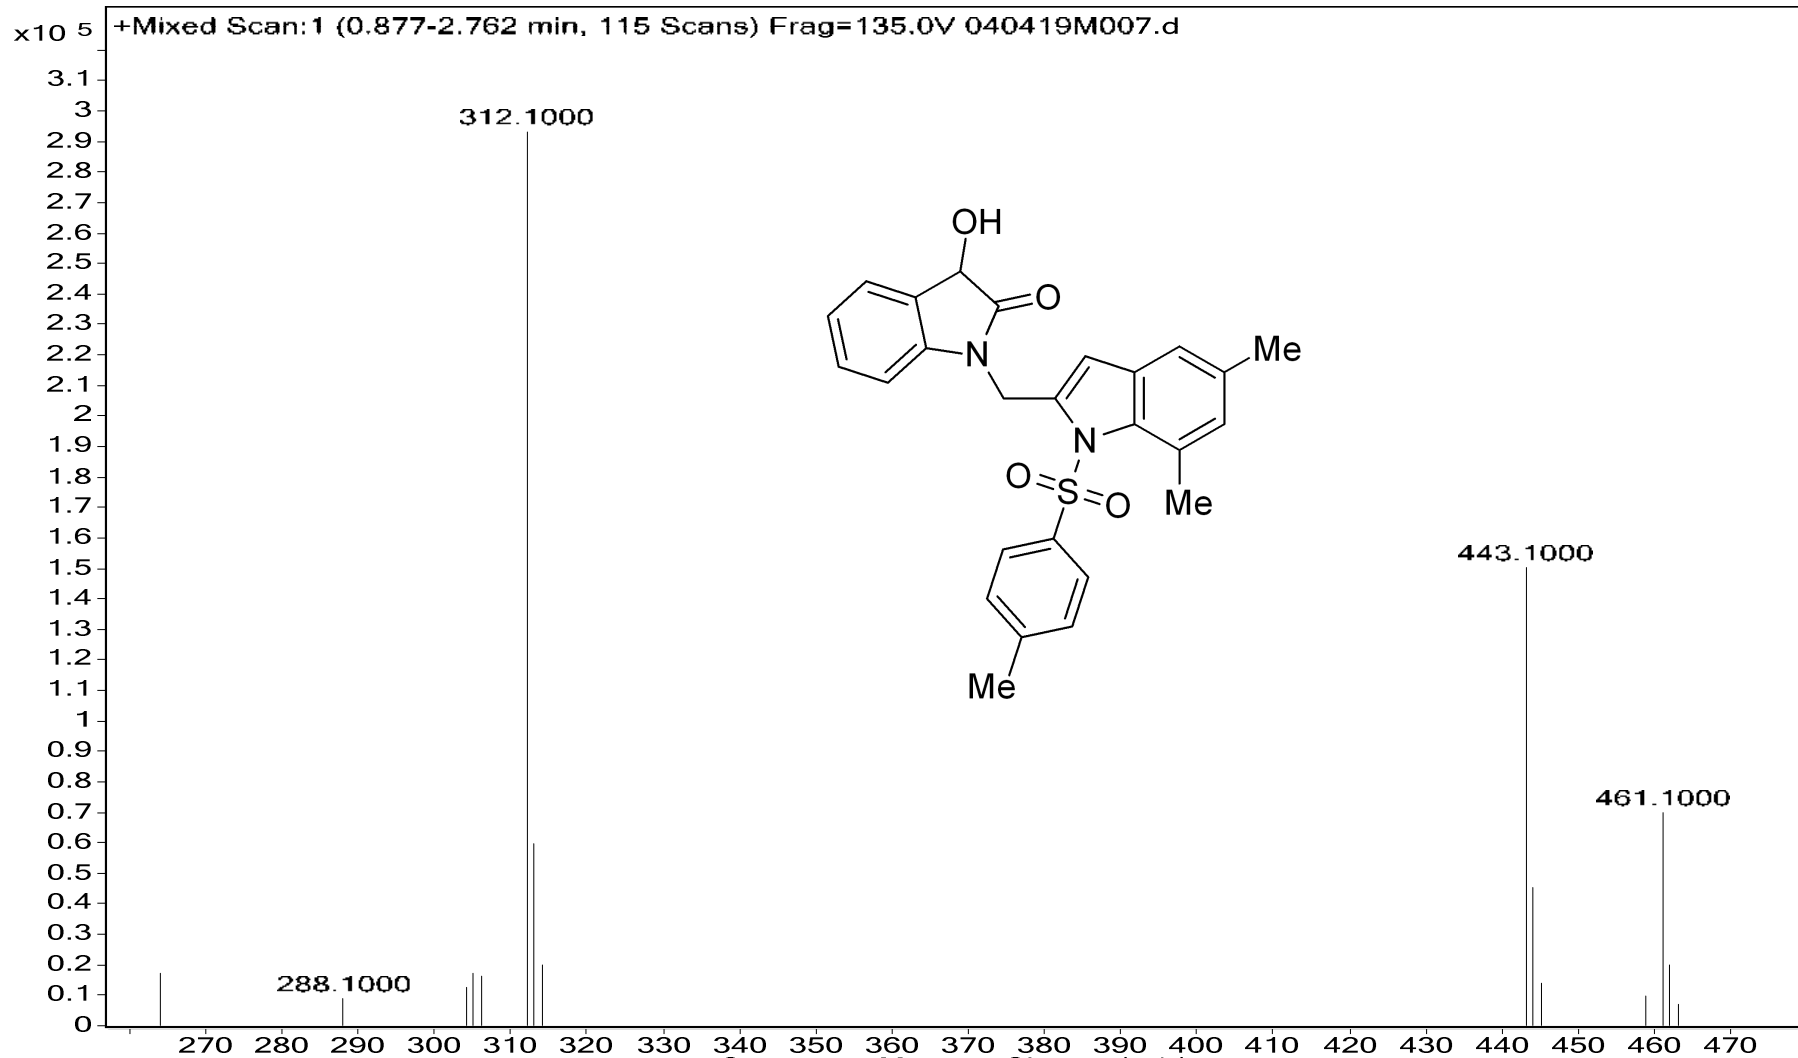

# Mass spectrum of compound 6a

|                      |               |                    |          |                        |          |                               |                       |
|----------------------|---------------|--------------------|----------|------------------------|----------|-------------------------------|-----------------------|
| <b>Sample Name</b>   | ILS-GSR-I2-An | <b>Position</b>    | Vial 14  | <b>Instrument Name</b> | LCMS     | <b>User Name</b>              |                       |
| <b>Inj Vol</b>       | 2             | <b>InjPosition</b> |          | <b>SampleType</b>      | Sample   | <b>IRM Calibration Status</b> | Not Applicable        |
| <b>Data Filename</b> | 311018M020.d  | <b>ACQ Method</b>  | MMI-SM.m | <b>Comment</b>         | MM18J042 | <b>Acquired Time</b>          | 10/31/2018 4:15:43 PM |

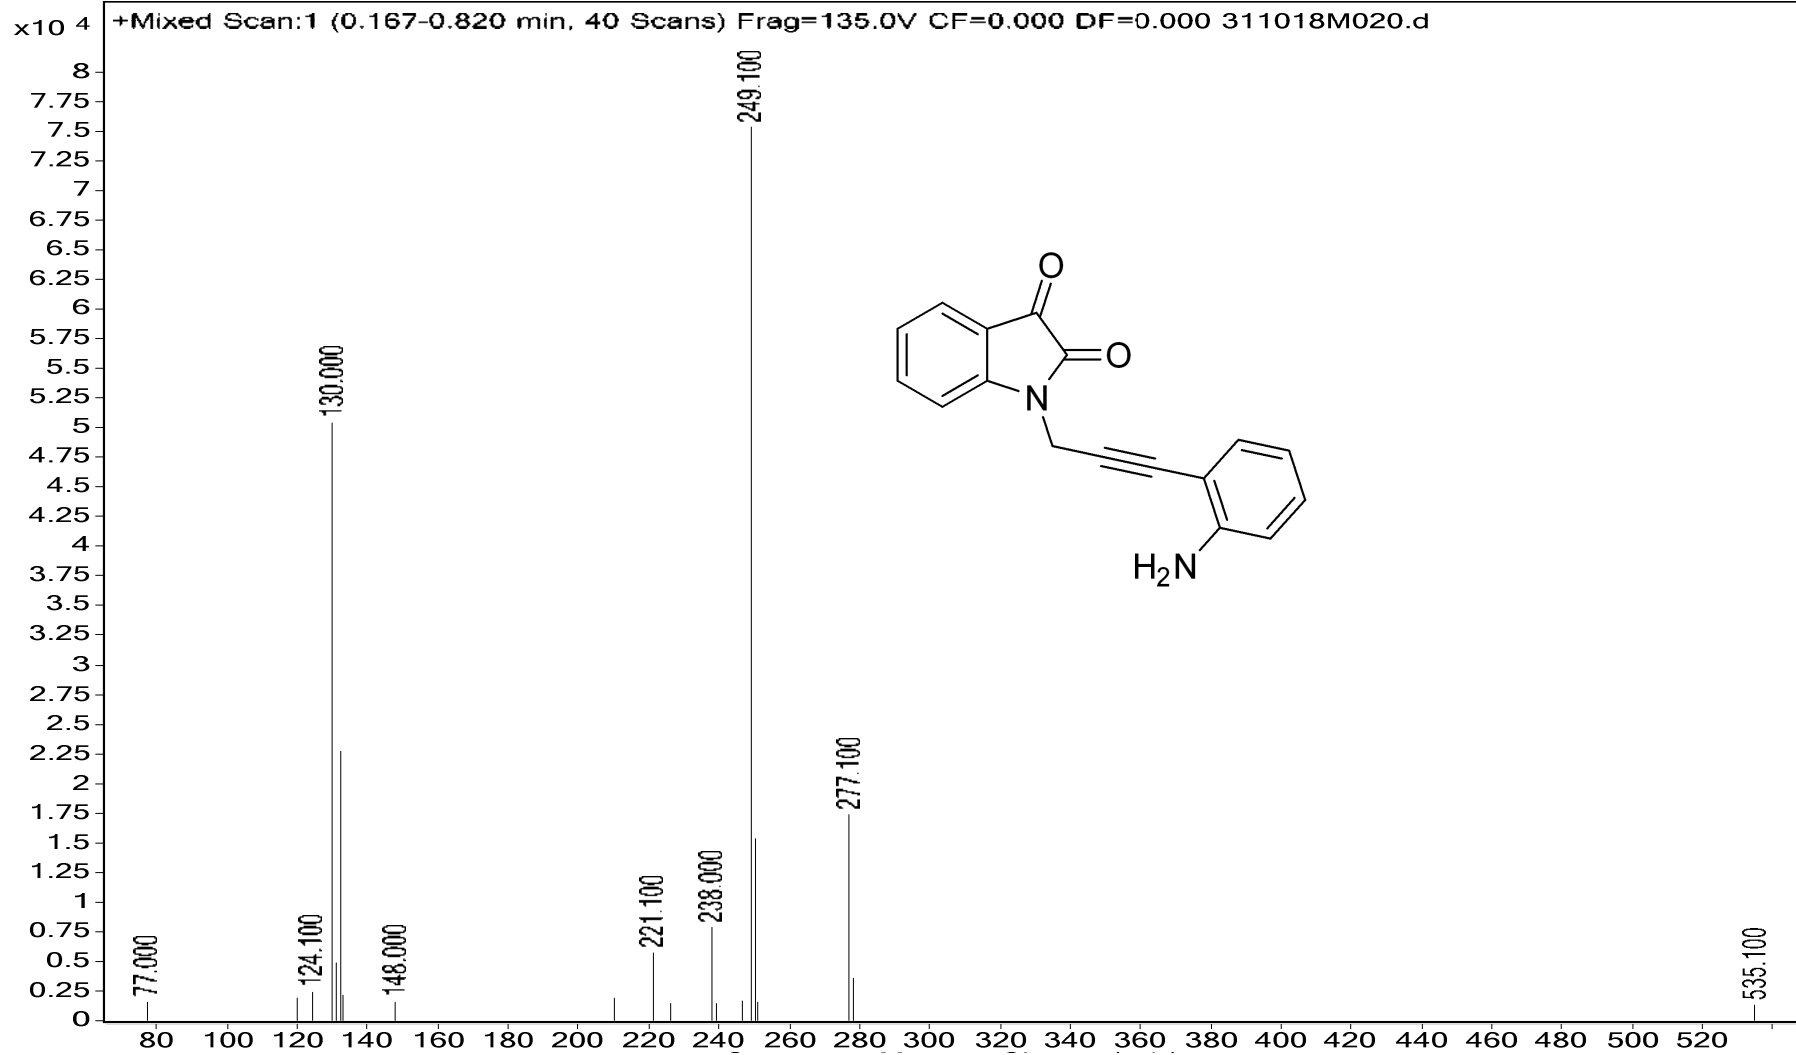

# Mass spectrum of compound **6b**

|                      |               |                    |          |                        |          |                               |                       |
|----------------------|---------------|--------------------|----------|------------------------|----------|-------------------------------|-----------------------|
| <b>Sample Name</b>   | ILS-GSR-I2-CO | <b>Position</b>    | Vial 26  | <b>Instrument Name</b> | LCMS     | <b>User Name</b>              |                       |
| <b>Inj Vol</b>       | 3             | <b>InjPosition</b> |          | <b>SampleType</b>      | Sample   | <b>IRM Calibration Status</b> | Not Applicable        |
| <b>Data Filename</b> | 041219M005.d  | <b>ACQ Method</b>  | MMI-SM.m | <b>Comment</b>         | MM19L005 | <b>Acquired Time</b>          | 12/4/2019 12:57:29 PM |

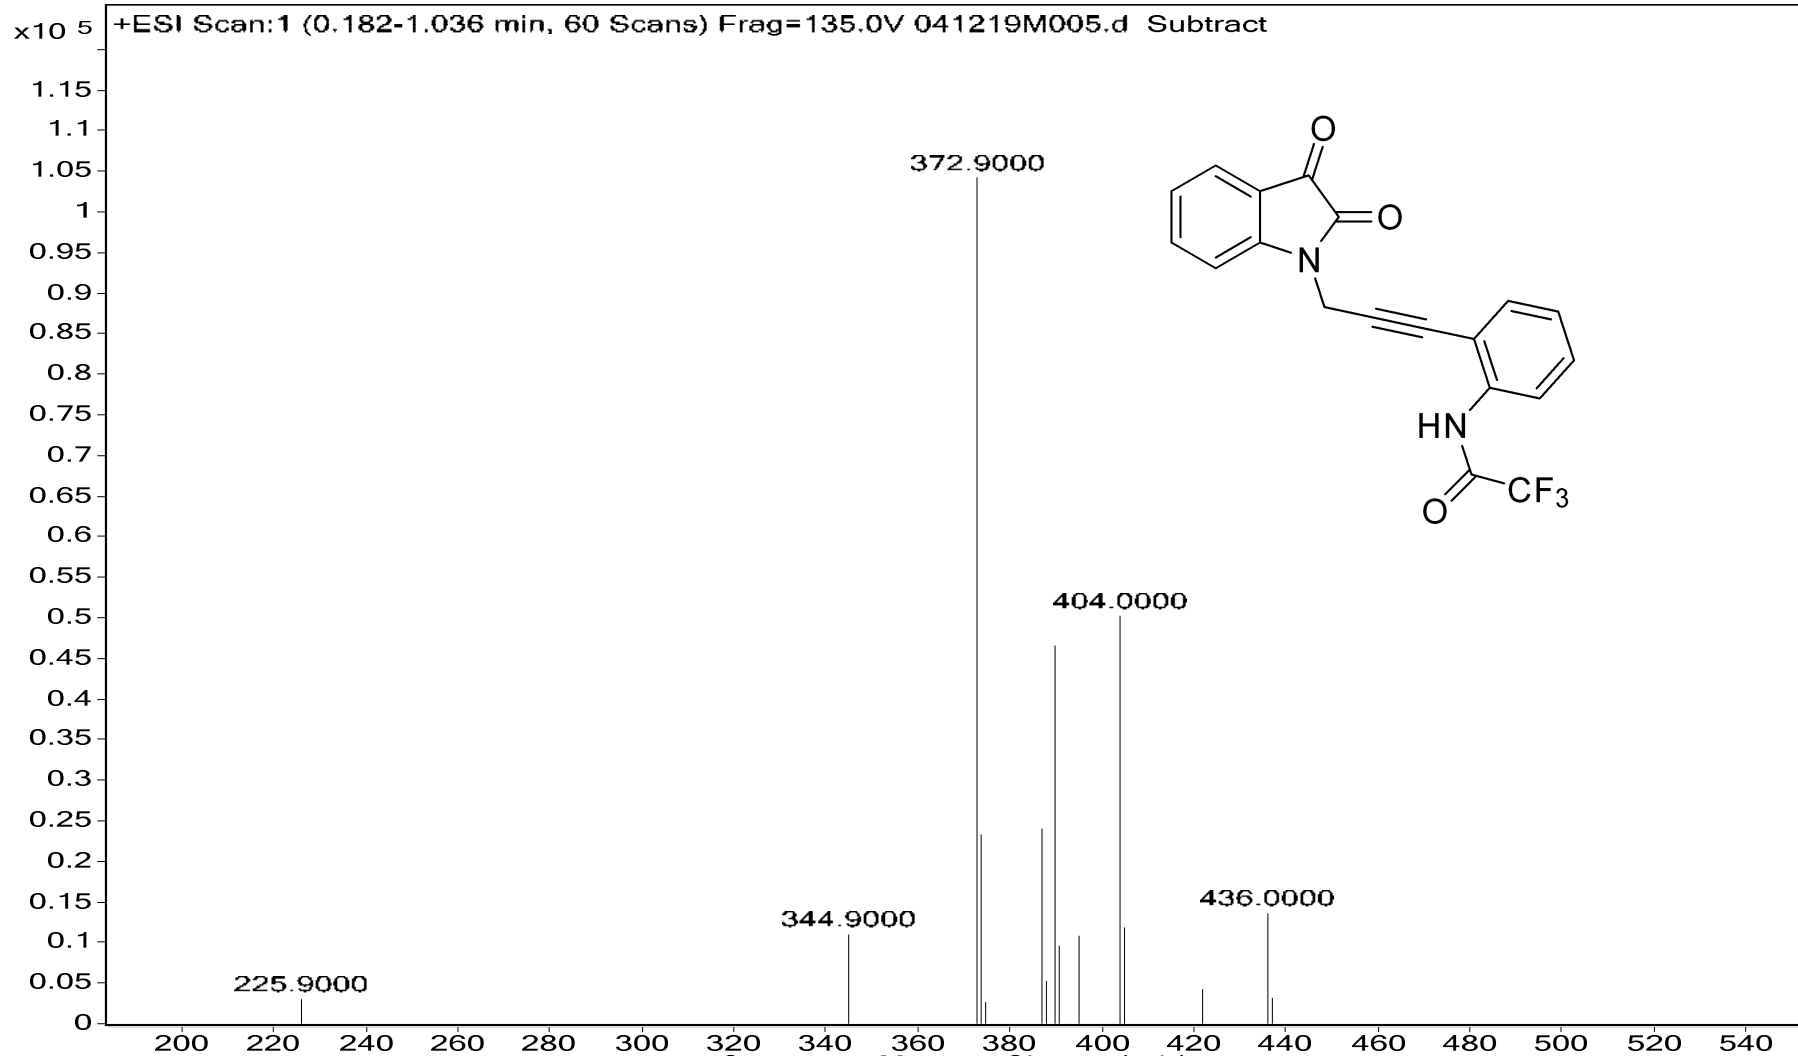

# HRMS spectrum of compound 3e

## Acquisition Parameter

|             |            |                       |           |                  |           |
|-------------|------------|-----------------------|-----------|------------------|-----------|
| Source Type | ESI        | Ion Polarity          | Positive  | Set Nebulizer    | 0.4 Bar   |
| Focus       | Not active | Set Capillary         | 3800 V    | Set Dry Heater   | 200 °C    |
| Scan Begin  | 50 m/z     | Set End Plate Offset  | -500 V    | Set Dry Gas      | 6.0 l/min |
| Scan End    | 1800 m/z   | Set Collision Cell RF | 350.0 Vpp | Set Divert Valve | Waste     |

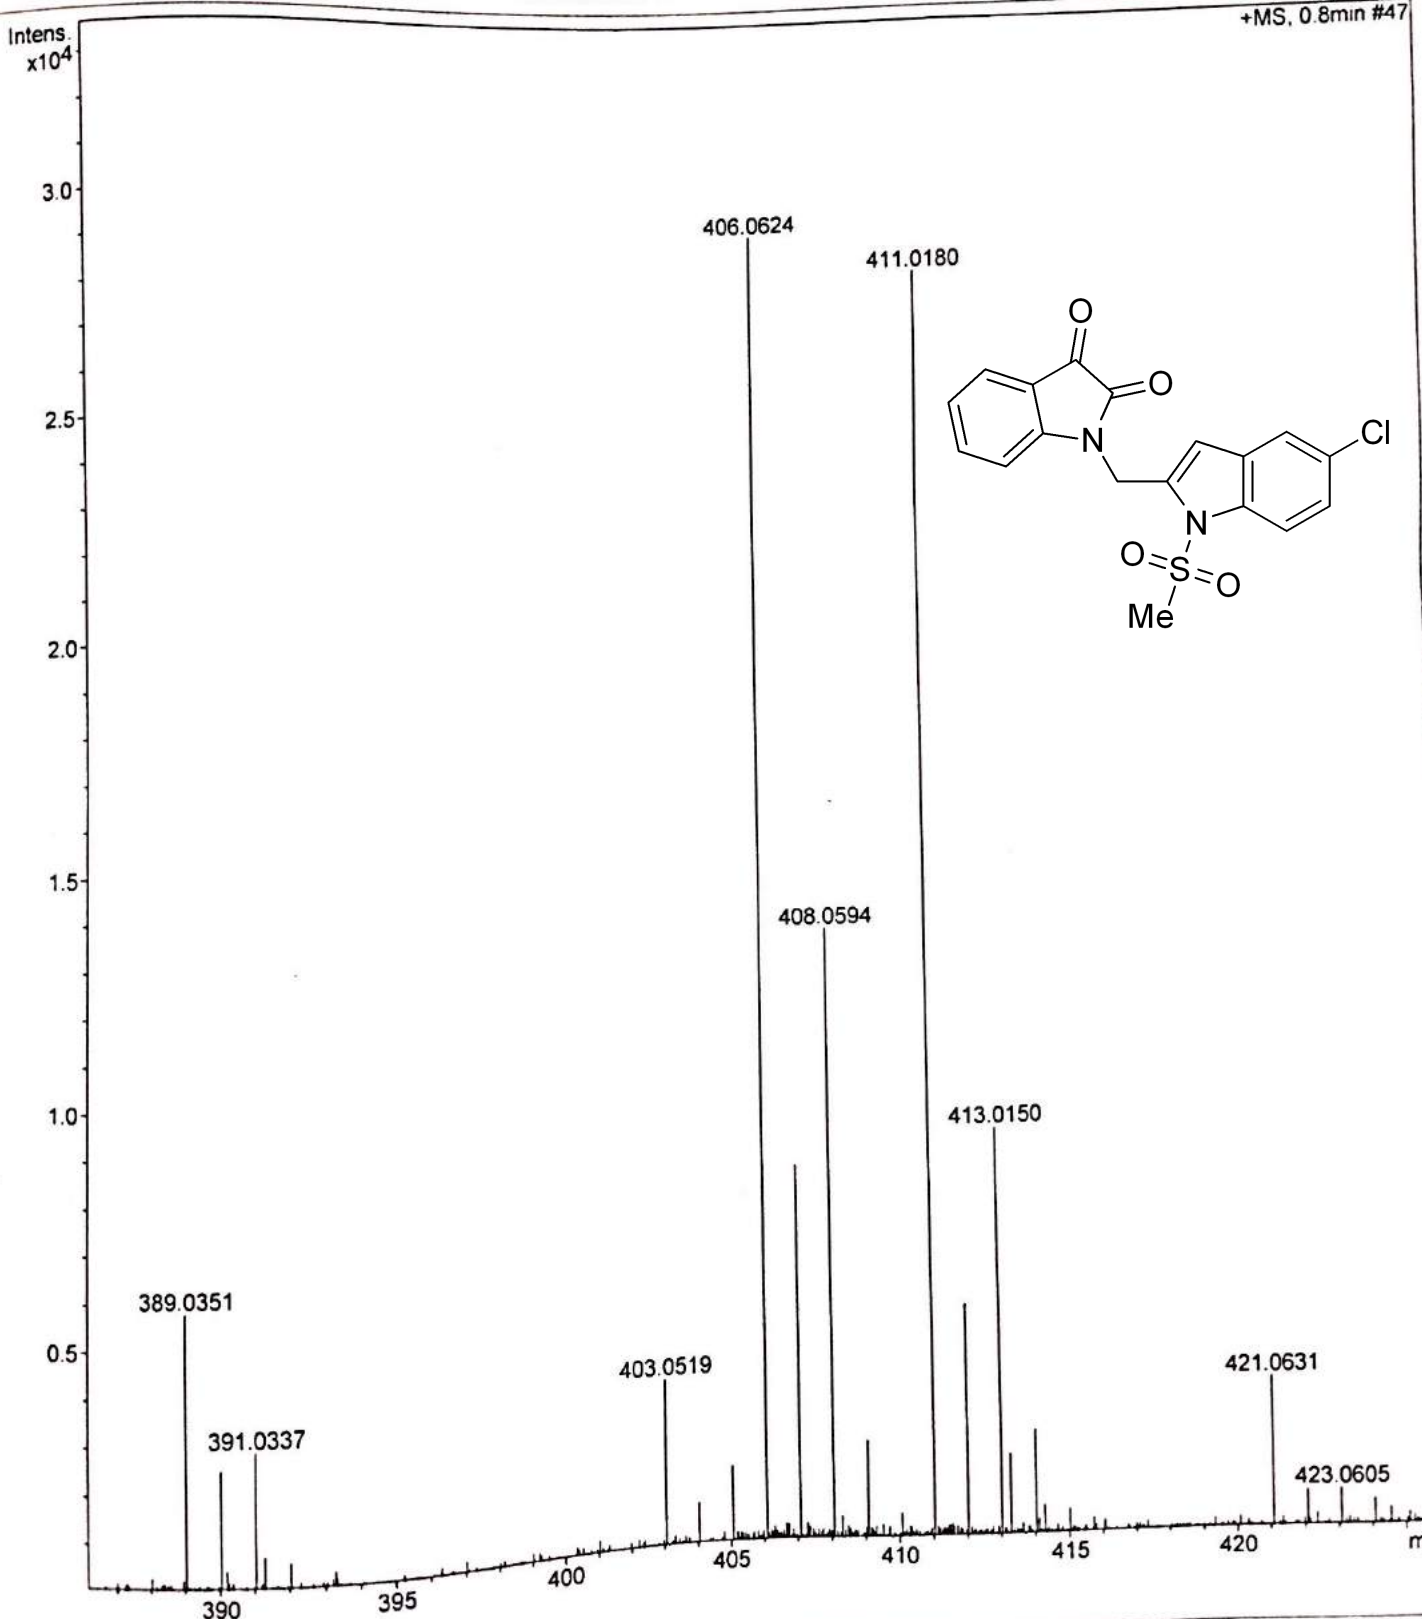

printed: 12/5/2019 3:25:33 AM

Page 1 of 1



# HRMS spectrum of compound 3f

## Acquisition Parameter

|             |            |                       |           |                  |           |
|-------------|------------|-----------------------|-----------|------------------|-----------|
| Source Type | ESI        | Ion Polarity          | Positive  | Set Nebulizer    | 0.4 Bar   |
| Focus       | Not active | Set Capillary         | 3800 V    | Set Dry Heater   | 200 °C    |
| Scan Begin  | 50 m/z     | Set End Plate Offset  | -500 V    | Set Dry Gas      | 6.0 l/min |
| Scan End    | 1800 m/z   | Set Collision Cell RF | 350.0 Vpp | Set Divert Valve | Waste     |

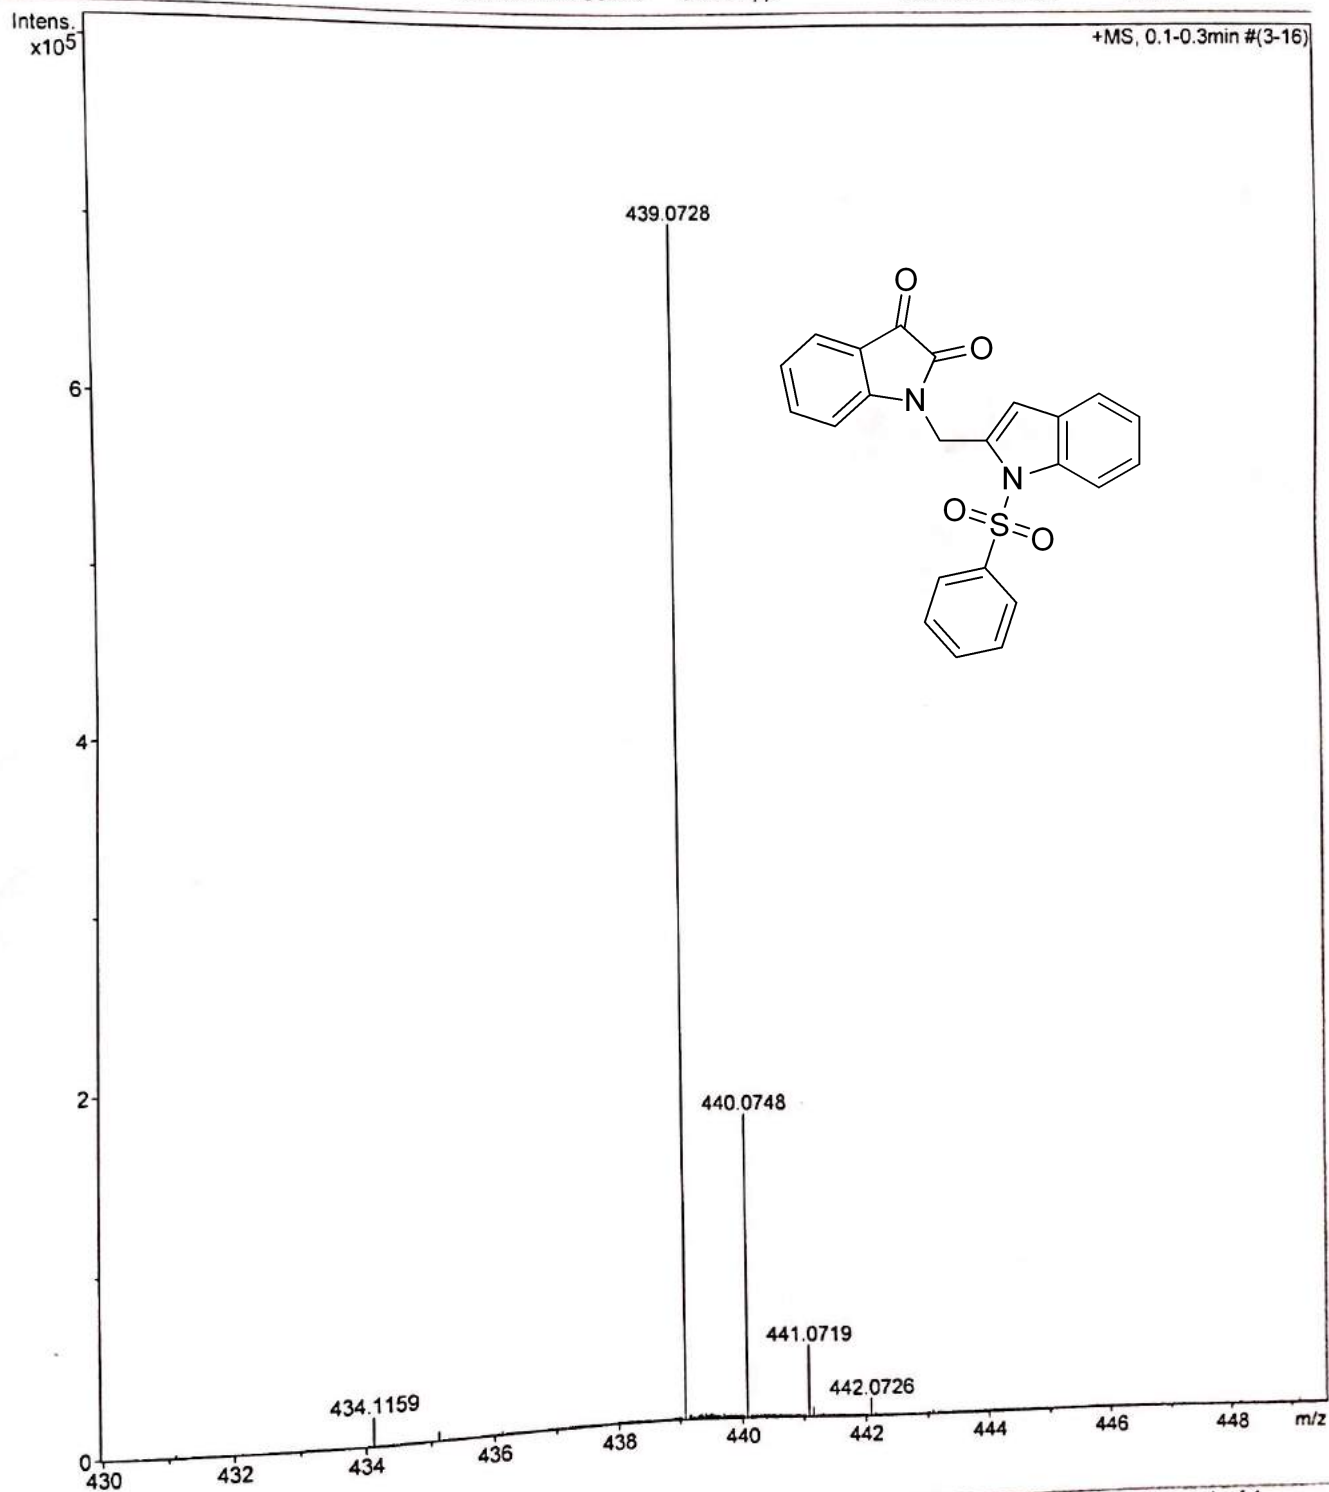

## SAMPLE INFORMATION

|                                            |                  |                     |              |
|--------------------------------------------|------------------|---------------------|--------------|
| Sample Name:                               | ILS-GSR-I2-CI-Ts | Acquired By:        | System       |
| AR Number :                                | CM18L011         | Sample Set Name:    | 26122018_005 |
| Vial:                                      | 70               | Acq. Method Set:    | API LVO_M    |
| Injection #:                               | 1                | Processing Method:  | ILS PROC     |
| Injection Volume:                          | 10.00 ul         | Channel Name:       | 245.0nm      |
| Run Time:                                  | 25.0 Minutes     | Proc. Chnl. Descr.: | PDA 245.0 nm |
| Date Acquired: 12/26/2018 10:52:41 AM IST  |                  |                     |              |
| Date Processed: 12/26/2018 12:42:50 PM IST |                  |                     |              |

Column : Symmetry C18 4.6\*75mm 3.5um  
 Mobile phase : A) 10mM Ammonium Formate in water B) ACN  
 T/B: 0/10, 3/10, 15/95, 20/95, 21/10, 25/10  
 Flow: 1.0ml/min, Diluent: ACN:water(80:20)

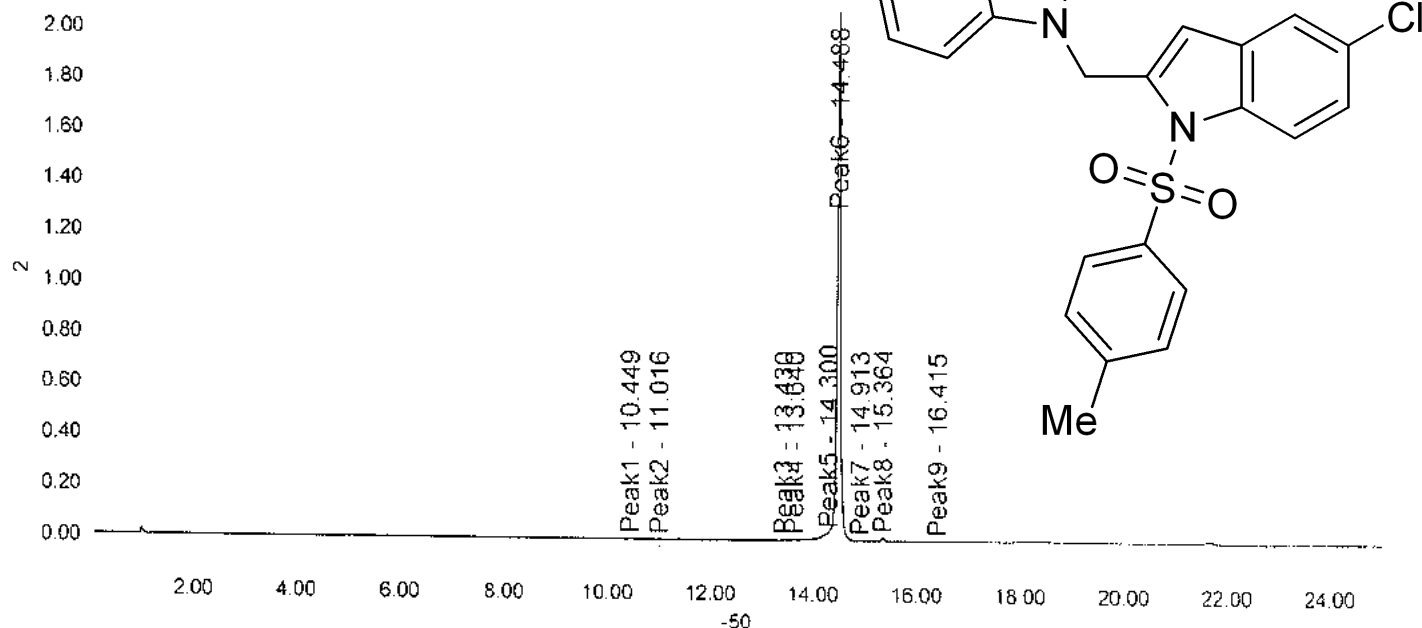

| Peak Name | RT     | Area    | % Area |
|-----------|--------|---------|--------|
| 1 Peak1   | 10.449 | 7731    | 0.08   |
| 2 Peak2   | 11.016 | 2411    | 0.02   |
| 3 Peak3   | 13.430 | 7498    | 0.07   |
| 4 Peak4   | 13.640 | 6863    | 0.07   |
| 5 Peak5   | 14.300 | 197026  | 1.95   |
| 6 Peak6   | 14.488 | 9803070 | 97.15  |
| 7 Peak7   | 14.913 | 10534   | 0.10   |
| 8 Peak8   | 15.364 | 52651   | 0.52   |

| Peak Name | RT     | Area | % Area |
|-----------|--------|------|--------|
| 9 Peak9   | 16.415 | 3233 | 0.03   |

Injection Date : Tue, 6. Nov. 2018      Seq Line : 1  
 Sample Name : ILS-GSR-I2-BrTs      Sample Name : 2  
 Acq Operator : RAMESH G      Inj. No. : 1  
 A R Number : CM18K003      -> Inj. Vol. : 5 µl  
 Acq. Method : D:\DATA\2018\NOV-2018\06112018-002 2018-11-06 14-37-->  
 Analysis Method : D:\CHEM32\1\METHODS\LVO IMP\_M2.M  
 Last Changed : Tue, 6. Nov. 2018, 03:37:23 pm

Column : Cosmicsil Aura ODS 150\*4.6mm 5µm  
 Mobile phase: A) 0.1% TFA in water , B) ACN  
 T/B%: 0/30,20/95,30/95,31/30,35/30.  
 Flow:1.0ml/min, Diluent: ACN:Water (80:20).

\*DAD1, Sig=245.00, 1.00 Ref=off, EXT of 06112018-006.D

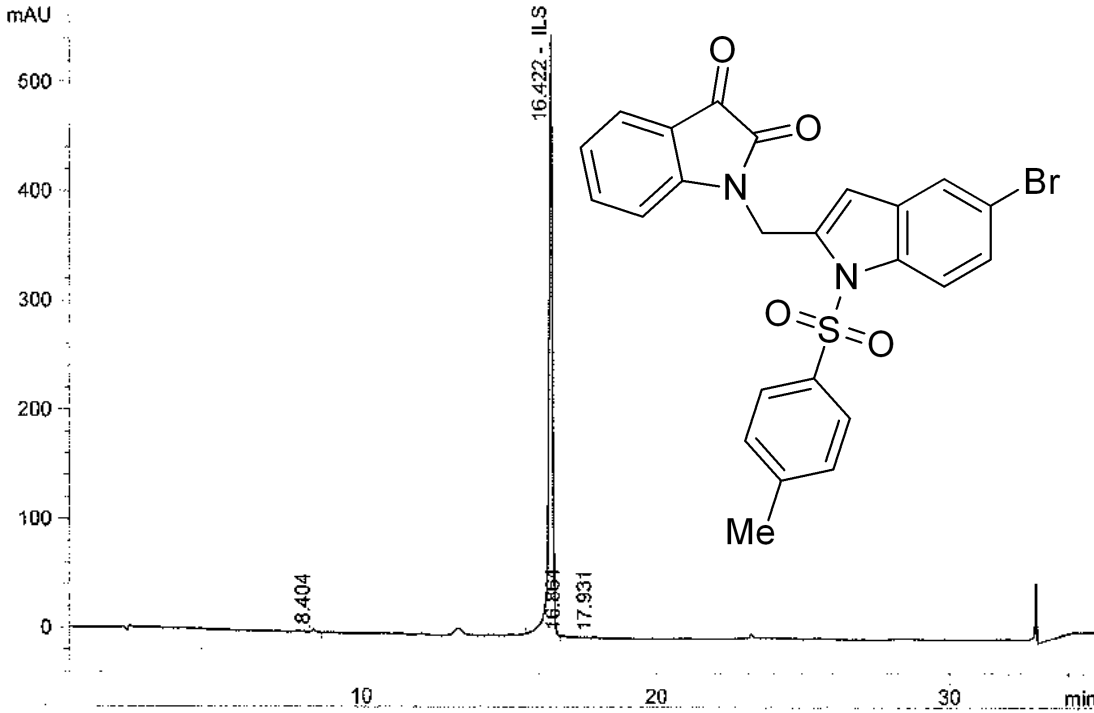

Customized Report: test2

Sorted By Signal  
 Calib. Data Modified : Tue, 6. Nov. 2018, 03:37:23 pm

| # | Compound Name | RT     | RelRT | Area     | Area%  | Symmetry | Plates    | Resolution |
|---|---------------|--------|-------|----------|--------|----------|-----------|------------|
| 1 |               | 8.404  | 0.51  | 22.799   | 0.451  | 0.865    | 22010.08  |            |
| 2 | ILS           | 16.422 | 1.00  | 5019.009 | 99.353 | 1.248    | 89939.64  | 35.929     |
| 3 |               | 16.864 | 1.03  | 3.938    | 0.078  | 0.640    | 70025.63  | 1.861      |
| 4 |               | 17.931 | 1.09  | 5.940    | 0.118  | 0.907    | 100192.05 | 4.424      |

Analyzed By

Checked By *Rep*

\*\*\* End of Report \*\*\*

*06/11/18*

*06/11/2018*



Injection Date : Tue, 30. Oct. 2018  
 Sample Name : ILS-GSR-I2-TS  
 Acq Operator : RamaDevi  
 A R Number : CM18J022  
 Acq. Method : D:\DATA\2018\OCT-2018\30102018-02-SIP 2018-10-30 13-->  
 Analysis Method : D:\CHEM32\1\METHODS\API SIP\_M2.M  
 Last Changed : Tue, 30. Oct. 2018, 03:54:27 pm

Seq Line : 3  
 Sample Name : 12  
 Inj. No. : 1  
 Inj. Vol. : 5 µl

Column : X- Bridge C18 150\*4.6mm 5µm  
 Mobile phase: A) 0.1% TFA in water , B) ACN  
 T/B%: 0/5, 25/90, 35/90, 36/5, 40/5  
 Flow: 1.0ml/min, Diluent: ACN:H2O (80:20)

DAD1 G, Sig=240,16 Ref=off (D:\DATA\2018\OCT-2018\30102018-02-SIP 2018-10-30 13-01-49\30102018-005.

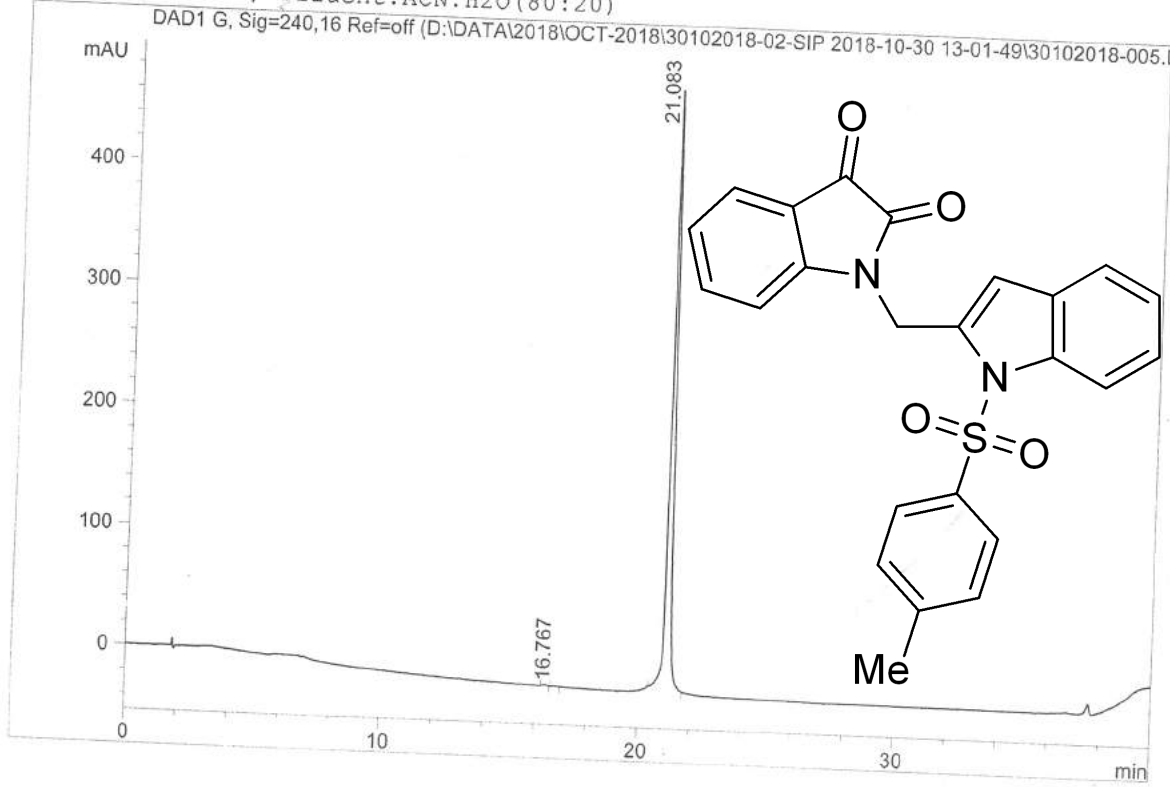

Customized Report: test2

Sorted By Signal  
 Calib. Data Modified : Tue, 30. Oct. 2018, 03:54:27 pm

| # | Compound Name | RT     | RelRT | Area     | Area%  | Symmetry | Plates    | Resolution |
|---|---------------|--------|-------|----------|--------|----------|-----------|------------|
| 1 |               | 16.376 | 0.78  | 10.325   | 0.209  | 0.686    | 69067.33  |            |
| 2 |               | 16.767 | 0.80  | 3.978    | 0.081  | 0.581    | 36463.84  | 1.299      |
| 3 |               | 21.083 | 1.00  | 4923.281 | 99.710 | 0.711    | 134012.57 | 14.820     |

Analyzed By: *[Signature]* 30/10/2018  
 Checked By: *[Signature]* 30/10/2018

\*\*\* End of Report \*\*\*

# HPLC of compound 3e

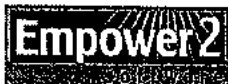

CPRI@DRILS

## SAMPLE INFORMATION

|                   |                           |                     |              |
|-------------------|---------------------------|---------------------|--------------|
| Sample Name:      | ILS-GSR-I2-CL-MS          | Acquired By:        | System       |
| A.R.Number:       | CM19L001                  | Sample Set Name:    | 02122019002  |
| Vial:             | 67                        | Acq. Method Set:    | API ABT_M    |
| Injection #:      | 1                         | Processing Method:  | ILS PRO      |
| Injection Volume: | 5.00 ul                   | Channel Name:       | 225.0nm      |
| Run Time:         | 35.0 Minutes              | Proc. Chnl. Descr.: | PDA 225.0 nm |
| Date Acquired:    | 12/2/2019 11:42:45 PM IST |                     |              |
| Date Processed:   | 12/3/2019 9:48:45 AM IST  |                     |              |

Column: X-Bridge C-18 150\*4.6mm 5µm  
 Mobile phase: A) 5mMNH4OAC in water B) ACN  
 T/%B: 0/5, 20/90,30/90, 31/5, 35/5  
 Flow: 1.0ml/min, Diluent: ACN:H2O (80:20)

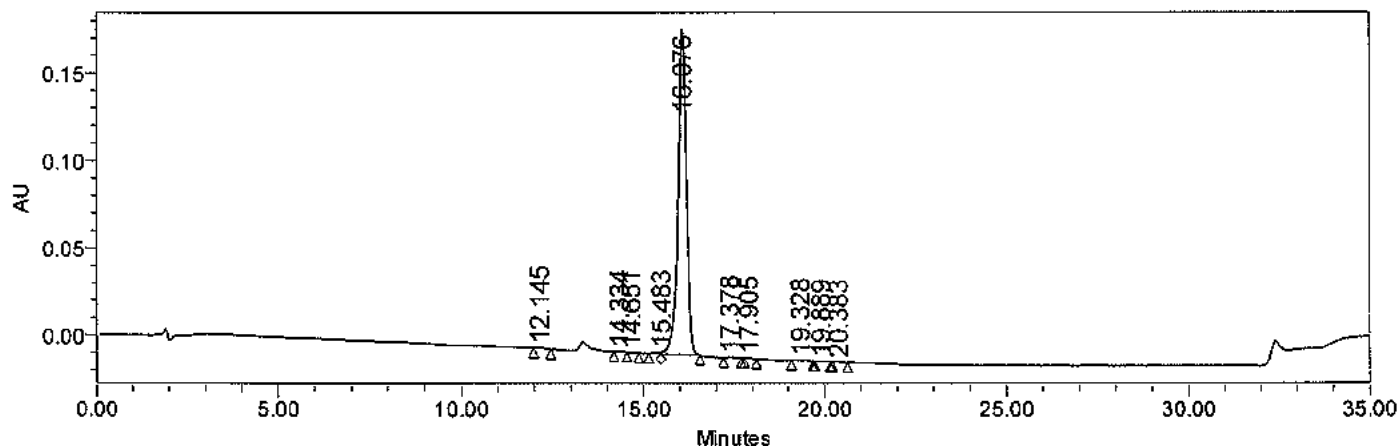

|    | RT     | Height | Area    | % Area |
|----|--------|--------|---------|--------|
| 1  | 12.145 | 564    | 7860    | 0.26   |
| 2  | 14.334 | 190    | 2461    | 0.08   |
| 3  | 14.651 | 179    | 2122    | 0.07   |
| 4  | 15.483 | 1008   | 13426   | 0.45   |
| 5  | 16.076 | 186642 | 2955091 | 98.40  |
| 6  | 17.378 | 407    | 5722    | 0.19   |
| 7  | 17.905 | 255    | 2908    | 0.10   |
| 8  | 19.328 | 505    | 9265    | 0.31   |
| 9  | 19.889 | 133    | 1852    | 0.06   |
| 10 | 20.383 | 180    | 2413    | 0.08   |

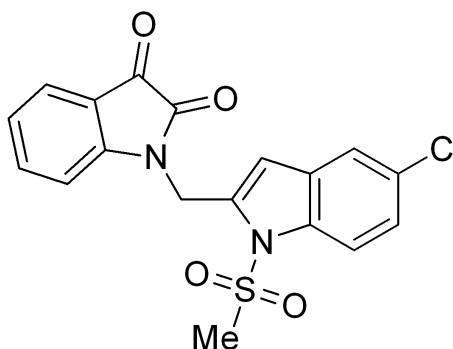



## SAMPLE INFORMATION

|                   |                |                     |              |
|-------------------|----------------|---------------------|--------------|
| Sample Name:      | ILS-GSR-I2-Ben | Acquired By:        | System       |
| A.R.Number:       | CM18L006       | Sample Set Name:    | 17122018_004 |
| Vial:             | 27             | Acq. Method Set:    | API CRI_M    |
| Injection #:      | 1              | Processing Method:  | ILS PROC     |
| Injection Volume: | 10.00 ul       | Channel Name:       | 245.0nm      |
| Run Time:         | 35.0 Minutes   | Proc. Chnl. Descr.: | PDA 245.0 nm |

Date Acquired: 12/17/2018 8:58:35 PM IST  
Date Processed: 12/18/2018 10:55:03 AM IST

Column: Cosmicsil Aura ODS C-18 150\*4.6mm 5um  
Mobile phase: A) 0.1% TFA in water B) ACN  
T/%B: 0/10,20/95,27/95,31/10,35/10  
Flow: 1.0ml/min, Diluent: ACN :H2O (80:20)

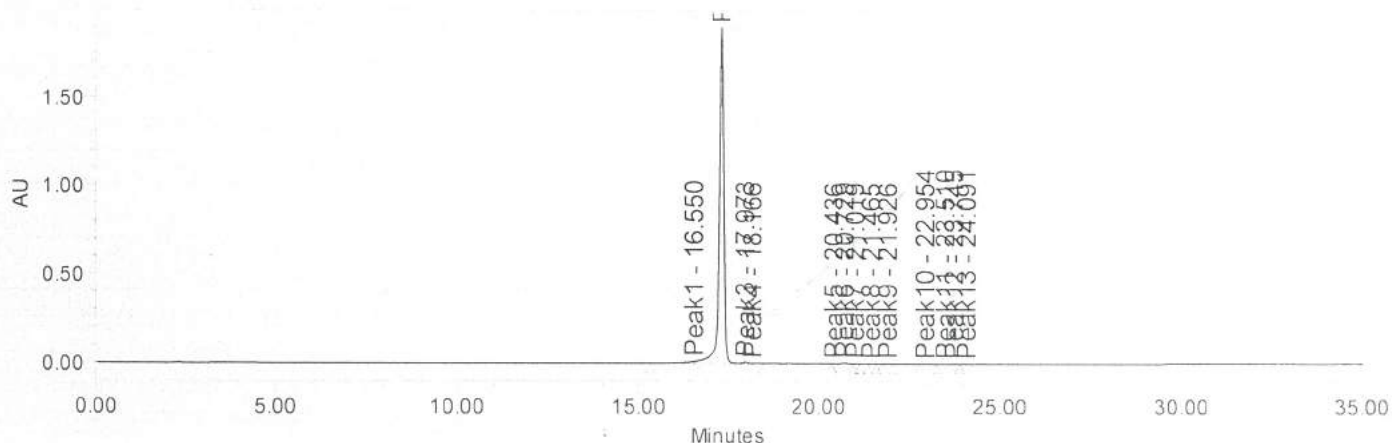

| Peak Name | RT     | Height  | Area     | % Area |
|-----------|--------|---------|----------|--------|
| 1 Peak1   | 16.550 | 10876   | 207920   | 1.24   |
| 2 Peak2   | 17.316 | 1895676 | 16387912 | 97.92  |
| 3 Peak3   | 17.973 | 9328    | 79452    | 0.47   |
| 4 Peak4   | 18.166 | 553     | 5933     | 0.04   |
| 5 Peak5   | 20.436 | 98      | 591      | 0.00   |
| 6 Peak6   | 20.729 | 4210    | 33049    | 0.20   |
| 7 Peak7   | 21.019 | 68      | 415      | 0.00   |
| 8 Peak8   | 21.465 | 98      | 701      | 0.00   |
| 9 Peak9   | 21.926 | 1450    | 11162    | 0.07   |
| 10 Peak10 | 22.954 | 183     | 1996     | 0.01   |
| 11 Peak11 | 23.510 | 95      | 1024     | 0.01   |

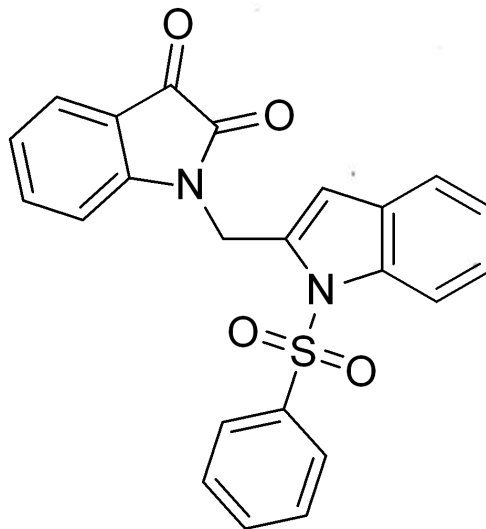

## SAMPLE INFORMATION

|                   |                            |                     |              |
|-------------------|----------------------------|---------------------|--------------|
| Sample Name:      | ILS-GSR-I2-TH              | Acquired By:        | System       |
| A.R.Number:       | CA19J031                   | Sample Set Name:    | 18102019_02  |
| Vial:             | 56                         | Acq. Method Set:    | ILS_RS_MET   |
| Injection #:      | 1                          | Processing Method:  | ILS PRO      |
| Injection Volume: | 5.00 ul                    | Channel Name:       | 245.0nm      |
| Run Time:         | 35.0 Minutes               | Proc. Chnl. Descr.: | PDA 245.0 nm |
| Date Acquired:    | 10/18/2019 10:51:25 PM IST |                     |              |
| Date Processed:   | 10/21/2019 5:05:36 PM IST  |                     |              |

Column: X-BRIDGE C-18 150\*4.6mm 5µm  
 Mobile phase: A) 5mMNH4OAC in water B) ACN  
 T/%B: 0/20, 20/90,30/90, 31/20, 35/20  
 Flow: 1.0ml/min, Diluent: ACN:THF

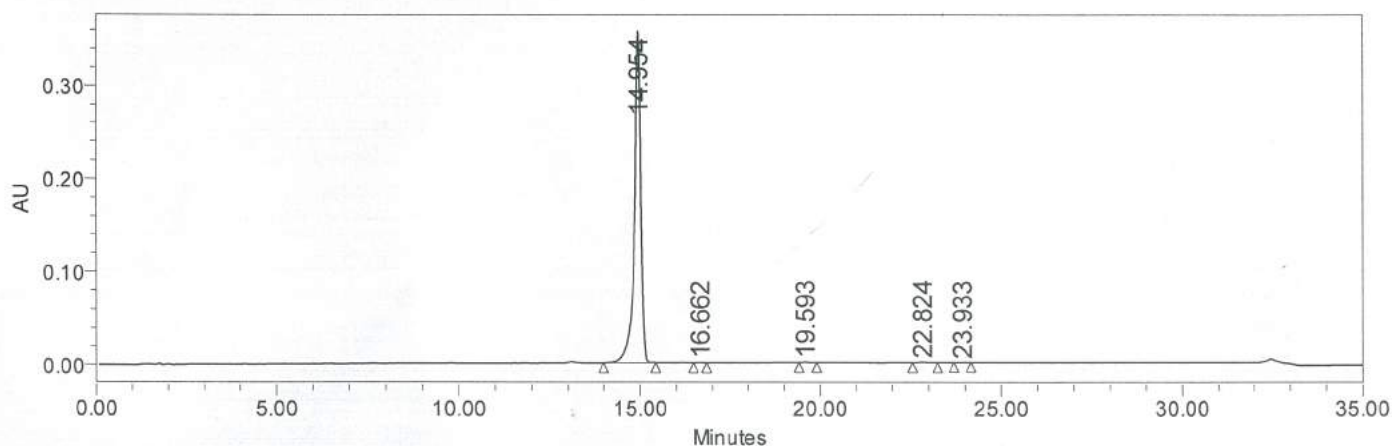

|   | RT     | Height | Area    | % Area |
|---|--------|--------|---------|--------|
| 1 | 14.954 | 356962 | 4363138 | 99.57  |
| 2 | 16.662 | 196    | 1789    | 0.04   |
| 3 | 19.593 | 589    | 5894    | 0.13   |
| 4 | 22.824 | 732    | 8833    | 0.20   |
| 5 | 23.933 | 131    | 2227    | 0.05   |

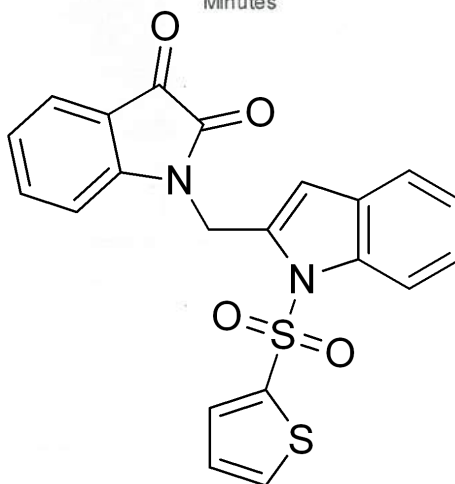

Analysed by

*Amey*  
21/10/19

Checked by

*lp*  
21/10/19





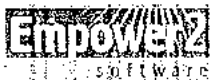

# HPLC of compound 3i

CPRI@DRILS

## SAMPLE INFORMATION

Sample Name: ILS-GSR-I2-DTS  
A.R.Number:  
Vial: 95  
Injection #: 1  
Injection Volume: 5.00 ul  
Run Time: 35.0 Minutes

Acquired By: System  
Sample Set Name: FF  
Acq. Method Set: ILS\_MET  
Processing Method: ILS\_PRO  
Channel Name: 245.0nm  
Proc. Chnl. Descr.: PDA 245.0 nm

Date Acquired: 4/4/2019 8:59:06 PM IST

Date Processed: 4/5/2019 9:49:40 AM IST

Column: X-BRIDGEC18 150\*4.6mm 5m  
Mobile phase: A) 5MM AMMONIUM ACETATE B) ACN  
T/%B:0/10,23/90,30/90,31/10,35/10  
Flow: 1ml/min, Diluent: DMSO

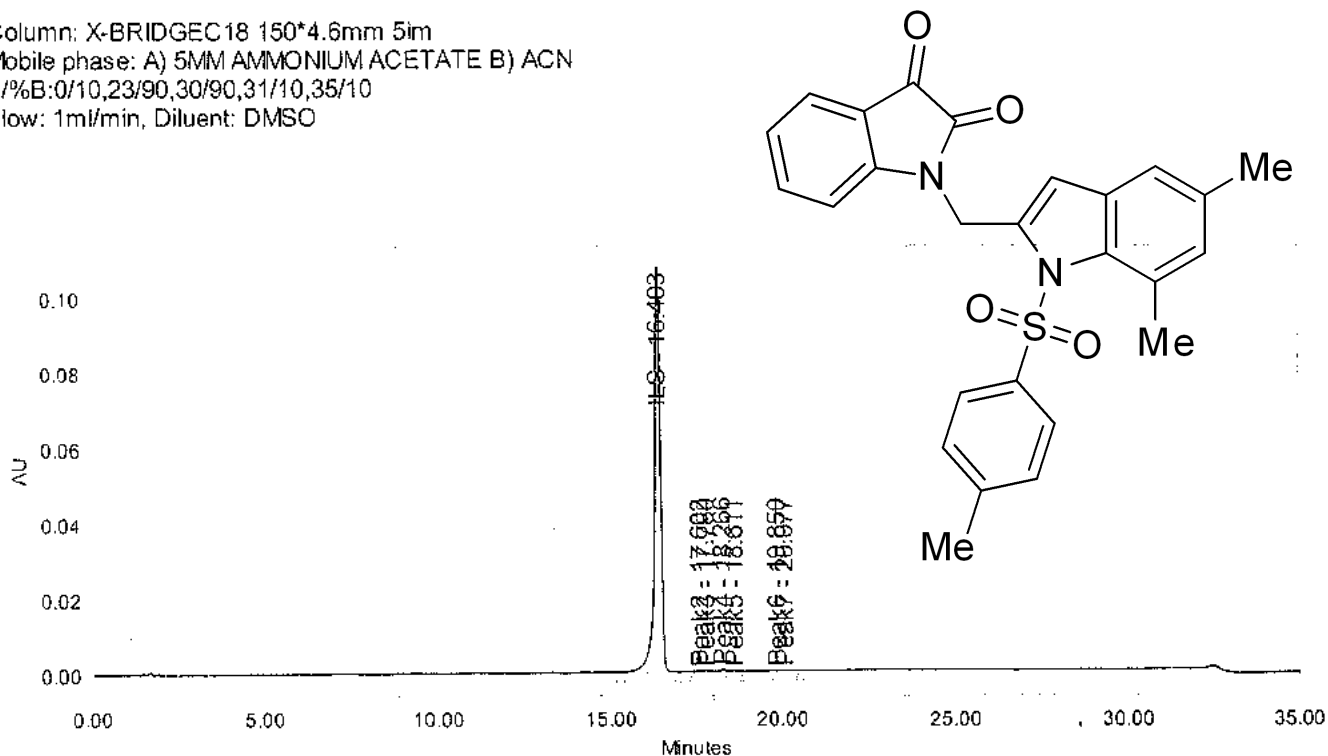

| Peak Name | RT     | Height | Area    | % Area | RT Ratio |
|-----------|--------|--------|---------|--------|----------|
| 1 ILS     | 16.403 | 107752 | 1271511 | 98.77  |          |
| 2 Peak2   | 17.602 | 144    | 1306    | 0.10   | 1.07     |
| 3 Peak3   | 17.780 | 282    | 3666    | 0.28   | 1.08     |
| 4 Peak4   | 18.266 | 499    | 5133    | 0.40   | 1.11     |
| 5 Peak5   | 18.611 | 212    | 2261    | 0.18   | 1.13     |
| 6 Peak6   | 19.850 | 40     | 382     | 0.03   | 1.21     |

Injection Date : Wed, 17. Apr. 2019 Seq Line : 2  
 Location : Vial 42  
 Sample Name : ILS-GSR-I2-DMS Inj. No. : 1  
 AR Number : CA19D008 -> Inj. Vol. : 5 µl

Acq. Method : C:\Chem32\1\DATA\2019\APR-2019\17042019-004-ILS 2019->  
 Analysis Method : C:\CHEM32\1\METHODS\API ILS.M  
 Last Changed : Mon, 22. Apr. 2019, 05:13:52 pm  
 (modified after loading)

COLUMN: X-BRIDGE C18, 150\*4.6mm 3.5µm  
 A) 0.1% TEA IN WATER (pH 3) B) ACN  
 T/%B: 0/10, 3/10, 15/95, 23/95, 25/10, 30/10  
 Flow rate: 1.0mL/min DILUENT: ACN: H2O (20:80)

A) 0.1% TEA in WATER pH-3 with OPA.

# HPLC of compound 3j

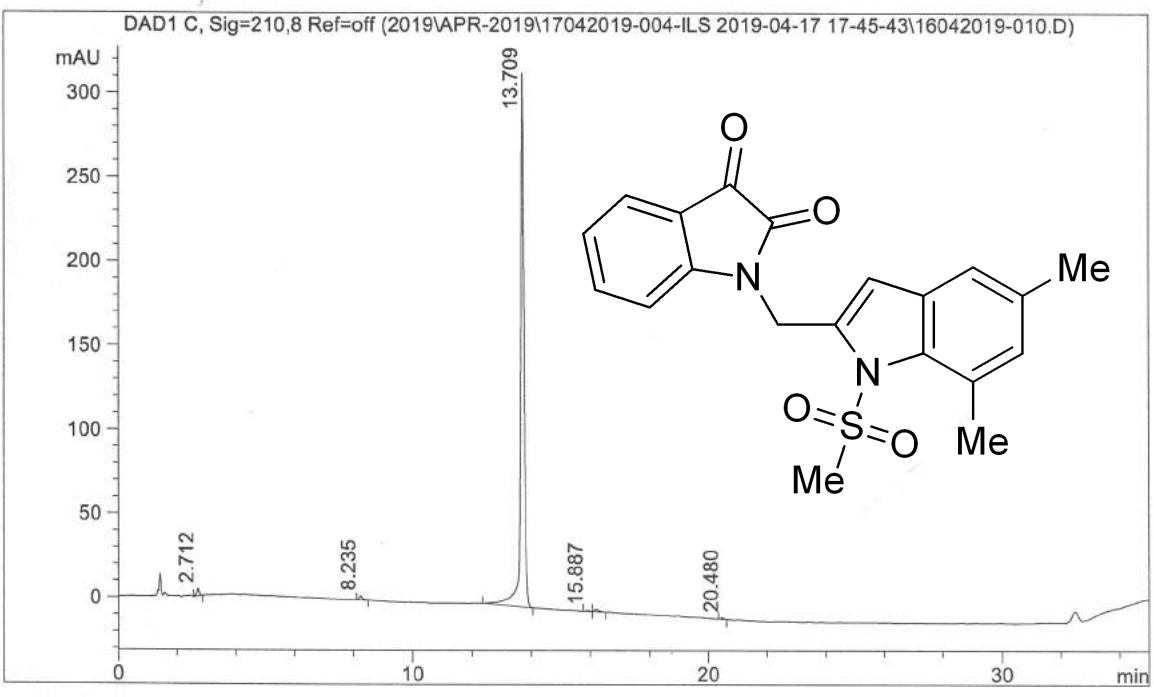

Customized Report: Short

Sorted By Signal  
 Calib. Data Modified : Mon, 22. Apr. 2019, 05:13:51 pm  
 Multiplier : 1.000000  
 Dilution : 1.000000  
 Uncalibrated Peaks : not reported

Signal 1: DAD1 C, Sig=210,8 Ref=off

| Peak # | RT [min] | Type | Width [min] | Area     | Area % | Name |
|--------|----------|------|-------------|----------|--------|------|
| 1      | 2.712    | MM   | 0.106       | 28.207   | 1.025  |      |
| 2      | 8.235    | MM   | 0.135       | 18.232   | 0.662  |      |
| 3      | 13.709   | MM   | 0.141       | 2677.587 | 97.284 | ILS  |
| 4      | 15.887   | MF   | 0.166       | 5.870    | 0.213  |      |
| 5      | 16.193   | FM   | 0.178       | 15.830   | 0.575  |      |
| 6      | 20.480   | MM   | 0.111       | 6.624    | 0.241  |      |

M. Renuka.  
22/04/2019.

Handwritten signature and date: 22/04/2019

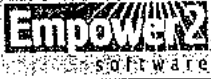

# HPLC of compound 3k

CPRI@DRILS

## SAMPLE INFORMATION

|                   |                           |                     |                    |
|-------------------|---------------------------|---------------------|--------------------|
| Sample Name:      | ILS-GSR-I2-DB             | Acquired By:        | System             |
| A.R.Number:       | CA19D013                  | Sample Set Name:    | 22042019_002       |
| Vial:             | 103                       | Acq. Method Set:    | API BDM IMP01 B4_M |
| Injection #:      | 1                         | Processing Method:  | BDM PRO            |
| Injection Volume: | 5.00 ul                   | Channel Name:       | 240.0nm            |
| Run Time:         | 30.0 Minutes              | Proc. Chnl. Descr.: | PDA 240.0 nm       |
| Date Acquired:    | 4/22/2019 7:10:08 PM IST  |                     |                    |
| Date Processed:   | 4/23/2019 11:25:52 AM IST |                     |                    |

Column: COSMOSIL C-18 150\*4.6mm 5µm  
Mobile phase: A) 5MM AMMONIUM ACETATE in water B) ACN  
T/%B: 0/5,20/90,25/90,26/5,30/5  
Flow: 1.0ml/min, Diluent: ACN:H2O (80:20)

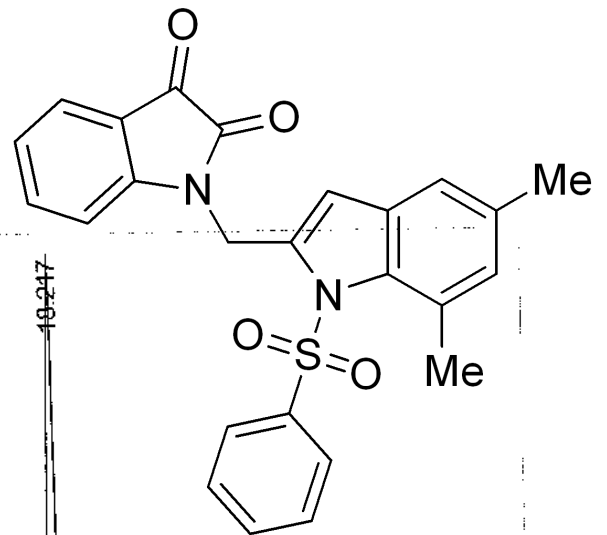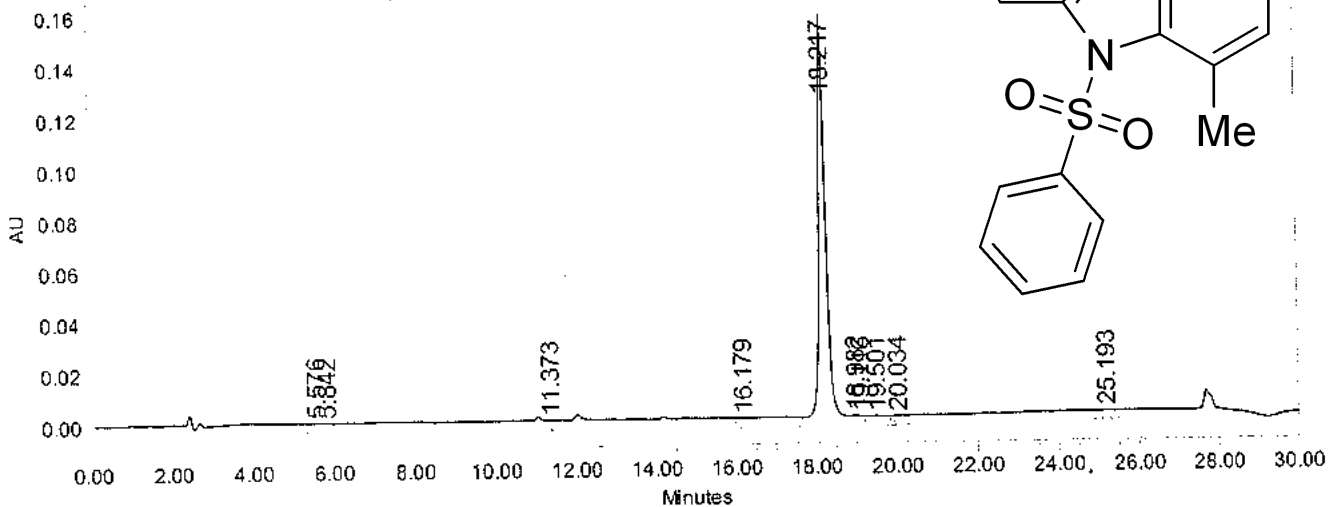

|   | RT     | Height | Area    | % Area |
|---|--------|--------|---------|--------|
| 1 | 5.576  | 103    | 1247    | 0.07   |
| 2 | 5.842  | 52     | 479     | 0.03   |
| 3 | 11.373 | 95     | 567     | 0.03   |
| 4 | 16.179 | 94     | 864     | 0.05   |
| 5 | 18.217 | 157152 | 1853508 | 98.95  |
| 6 | 18.982 | 601    | 7746    | 0.41   |

|    | RT     | Height | Area | % Area |
|----|--------|--------|------|--------|
| 7  | 19.116 | 271    | 2359 | 0.13   |
| 8  | 19.501 | 227    | 3892 | 0.21   |
| 9  | 20.034 | 122    | 1155 | 0.06   |
| 10 | 25.193 | 124    | 1316 | 0.07   |

# HPLC of compound 4a

## SAMPLE INFORMATION

|                   |                            |                     |              |
|-------------------|----------------------------|---------------------|--------------|
| Sample Name:      | ILS-GSR-I-CL-TS            | Acquired By:        | System       |
| A.R.Number:       | CM19J023                   | Sample Set Name:    | 14102019_03  |
| Vial:             | 108                        | Acq. Method Set:    | ILS_RS_MET   |
| Injection #:      | 1                          | Processing Method:  | ILS_PRO      |
| Injection Volume: | 5.00 ul                    | Channel Name:       | 220.0nm      |
| Run Time:         | 35.0 Minutes               | Proc. Chnl. Descr.: | PDA 220.0 nm |
| Date Acquired:    | 10/14/2019 11:22:15 PM IST |                     |              |
| Date Processed:   | 10/15/2019 10:31:16 AM IST |                     |              |

Column: X-Bridge C-18 150\*4.6mm 5um  
 Mobile phase: A) 5mMNH4OAC in water B) ACN  
 T/%B: 0/20, 20/90,30/90, 31/20, 35/20  
 Flow: 1.0ml/min, Diluent: THF:ACN:H2O (80:20)

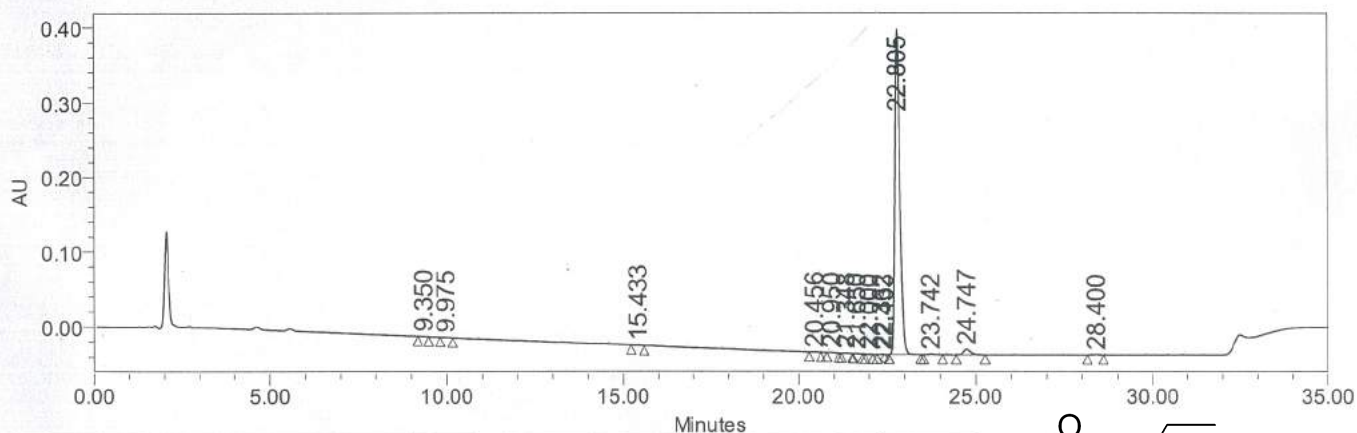

|    | RT     | Height | Area    | % Area |
|----|--------|--------|---------|--------|
| 1  | 9.350  | 194    | 1781    | 0.04   |
| 2  | 9.975  | 377    | 3955    | 0.09   |
| 3  | 15.433 | 339    | 3722    | 0.08   |
| 4  | 20.456 | 192    | 1956    | 0.04   |
| 5  | 20.950 | 212    | 2267    | 0.05   |
| 6  | 21.348 | 278    | 2771    | 0.06   |
| 7  | 21.650 | 154    | 1159    | 0.03   |
| 8  | 22.000 | 89     | 648     | 0.01   |
| 9  | 22.362 | 96     | 723     | 0.02   |
| 10 | 22.433 | 71     | 333     | 0.01   |
| 11 | 22.805 | 434335 | 4380168 | 97.13  |

|    | RT     | Height | Area  | % Area |
|----|--------|--------|-------|--------|
| 12 | 23.742 | 634    | 9127  | 0.20   |
| 13 | 24.747 | 7271   | 96556 | 2.14   |
| 14 | 28.400 | 343    | 4532  | 0.10   |

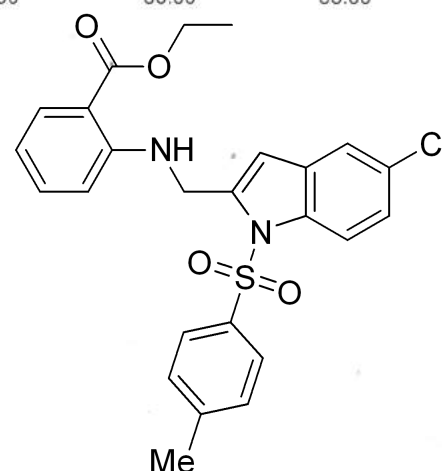

*M. Kenuka*  
15/10/19

*Ref*  
15/10/19



## SAMPLE INFORMATION

|                                          |                |                     |              |
|------------------------------------------|----------------|---------------------|--------------|
| Sample Name:                             | ILS-GSR/I2-Br2 | Acquired By:        | System       |
| A.R.Number:                              | MC19I043       | Sample Set Name:    | 28092019_02  |
| Vial:                                    | 12             | Acq. Method Set:    | ILS_RS_MET   |
| Injection #:                             | 1              | Processing Method:  | ILS PRO      |
| Injection Volume:                        | 5.00 ul        | Channel Name:       | 220.0nm      |
| Run Time:                                | 35.0 Minutes   | Proc. Chnl. Descr.: | PDA 220.0 nm |
| Date Acquired: 9/28/2019 10:13:20 PM IST |                |                     |              |
| Date Processed: 9/30/2019 3:45:08 PM IST |                |                     |              |

Column: X-BRIDGE C-18 150\*4.6mm 5µm  
 Mobile phase: A) 5mMNH4OAC in water B) ACN  
 T/%B: 0/20, 20/90,30/90, 31/20, 35/20  
 Flow: 1.0ml/min, Diluent: ACN:H2O (80:20)

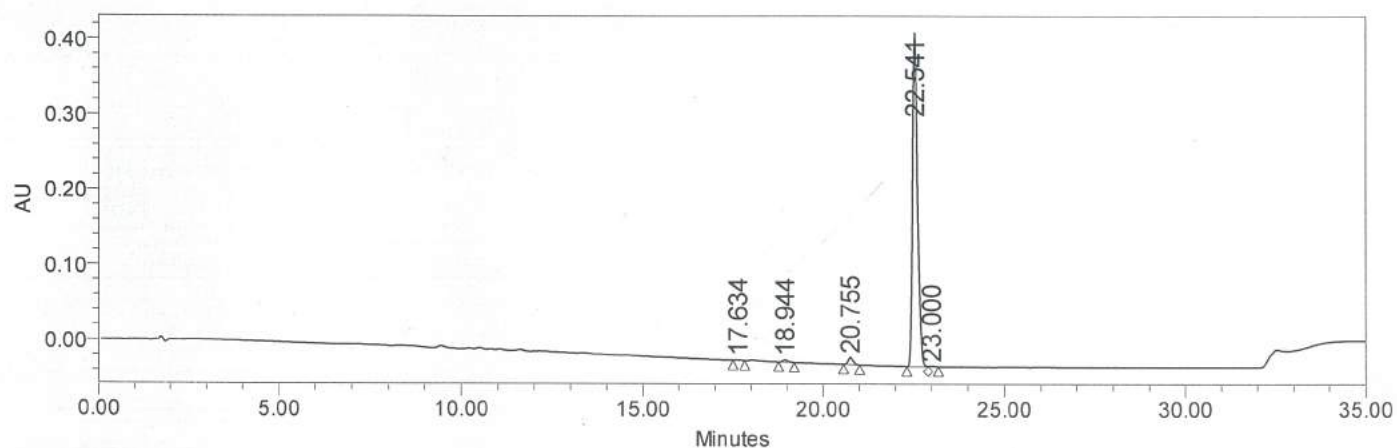

|   | RT     | Height | Area    | % Area |
|---|--------|--------|---------|--------|
| 1 | 17.634 | 617    | 5296    | 0.11   |
| 2 | 18.944 | 2874   | 28824   | 0.62   |
| 3 | 20.755 | 9333   | 93273   | 2.01   |
| 4 | 22.541 | 445850 | 4497948 | 97.12  |
| 5 | 23.000 | 622    | 6171    | 0.13   |

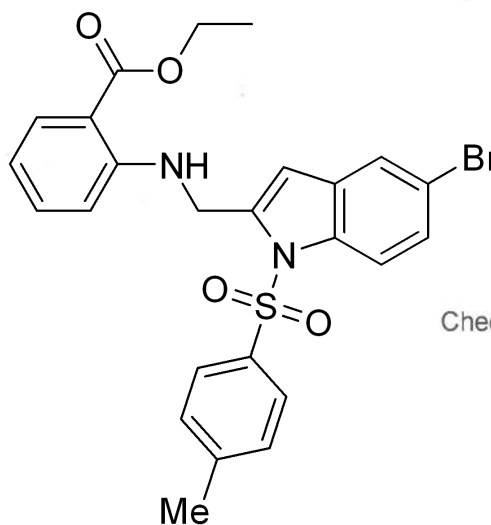

Analysed by

*Handwritten signature*  
30/09/19

Checked by

*Handwritten signature*  
30/09/19

## SAMPLE INFORMATION

|                                            |               |                     |              |
|--------------------------------------------|---------------|---------------------|--------------|
| Sample Name:                               | ILS-GSR-I2-F2 | Acquired By:        | System       |
| A.R.Number:                                | CM19I042      | Sample Set Name:    | 21102019_03  |
| Vial:                                      | 56            | Acq. Method Set:    | ILS_RS_MET2  |
| Injection #:                               | 1             | Processing Method:  | ILS PRO      |
| Injection Volume:                          | 5.00 ul       | Channel Name:       | 220.0nm      |
| Run Time:                                  | 45.0 Minutes  | Proc. Chnl. Descr.: | PDA 220.0 nm |
| Date Acquired: 10/22/2019 1:14:28 AM IST   |               |                     |              |
| Date Processed: 10/22/2019 11:46:13 AM IST |               |                     |              |

Column: Eclipse plus C18 250\*4.6mm 5µm  
 Mobile phase: A) 5mMNH4OAC in water B) ACN  
 T/%B: 0/30,30/90,40/90,41/30,45/30  
 Flow: 1.0ml/min, Diluent: ACN:THF

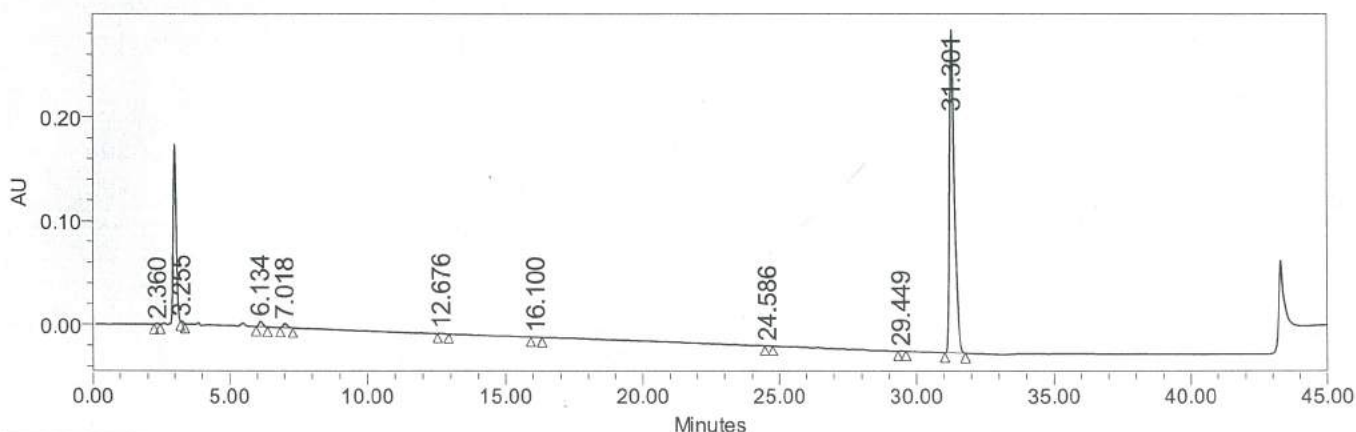

|   | RT     | Height | Area    | % Area |
|---|--------|--------|---------|--------|
| 1 | 2.360  | 778    | 4810    | 0.13   |
| 2 | 3.255  | 942    | 5128    | 0.13   |
| 3 | 6.134  | 5528   | 54547   | 1.43   |
| 4 | 7.018  | 3771   | 39405   | 1.03   |
| 5 | 12.676 | 471    | 5115    | 0.13   |
| 6 | 16.100 | 183    | 2404    | 0.06   |
| 7 | 24.586 | 231    | 2389    | 0.06   |
| 8 | 29.449 | 309    | 2759    | 0.07   |
| 9 | 31.301 | 310569 | 3702334 | 96.95  |

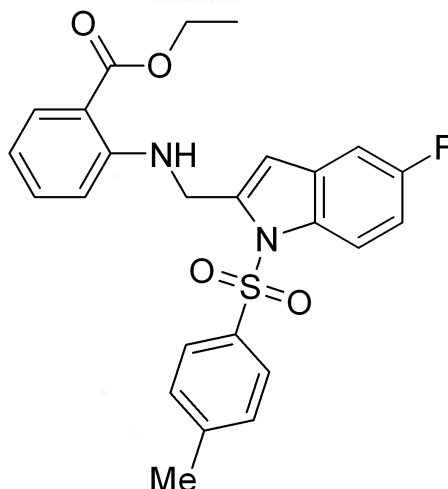

Analysed by

*M. Renuka* 22/10/2019

Checked by

*U*  
22/10/19

## SAMPLE INFORMATION

|                   |                           |                     |              |
|-------------------|---------------------------|---------------------|--------------|
| Sample Name:      | ILS-GSR-I2-TS2            | Acquired By:        | System       |
| A.R.Number:       | CM18L016                  | Sample Set Name:    | 10122018_001 |
| Vial:             | 3                         | Acq. Method Set:    | EST IMP_M    |
| Injection #:      | 1                         | Processing Method:  | ILS PROC     |
| Injection Volume: | 10.00 ul                  | Channel Name:       | 220.0nm      |
| Run Time:         | 35.0 Minutes              | Proc. Chnl. Descr.: | PDA 220.0 nm |
| Date Acquired:    | 12/10/2018 1:14:50 PM IST |                     |              |
| Date Processed:   | 12/10/2018 2:03:15 PM IST |                     |              |

Column: X-Bridge C18 150\*4.6mm 5µm  
 Mobile phase: A) 0.1% TFA in water B) ACN  
 T/%B: 0/5,20/90,30/90,31/5,35/5  
 Flow: 1.0ml/min, Diluent: ACN :H2O (80:20)

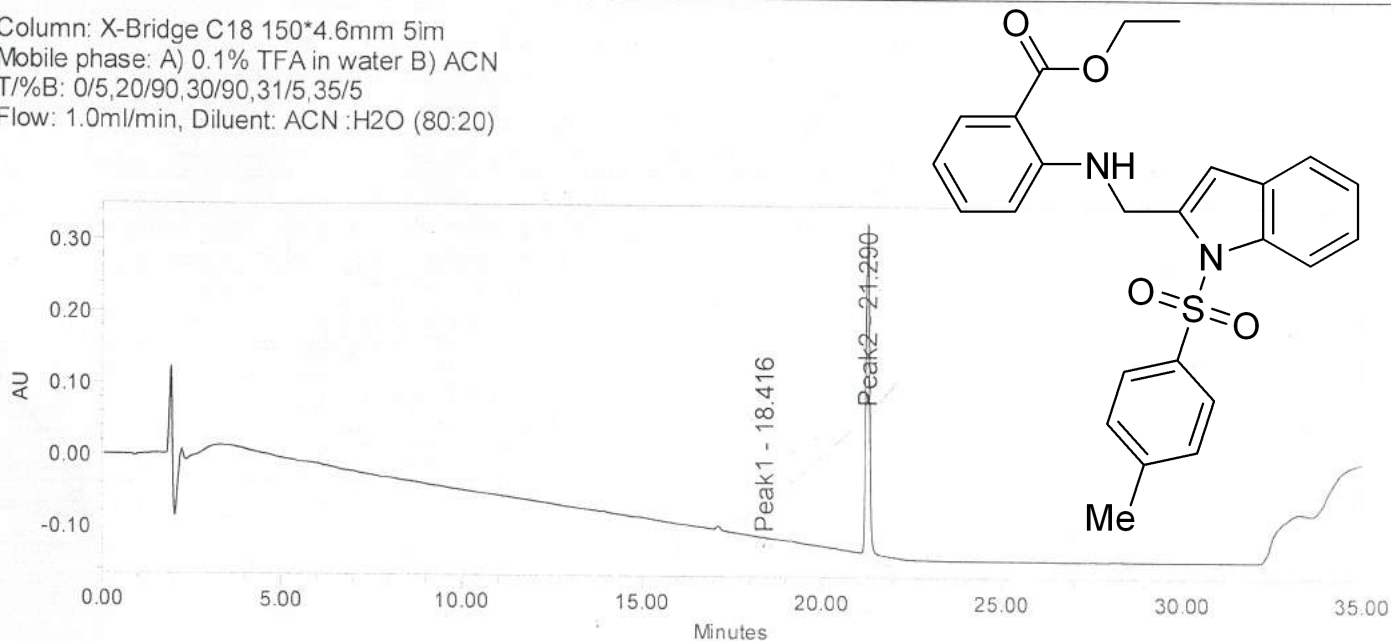

| Peak Name | RT     | Height | Area    | % Area |
|-----------|--------|--------|---------|--------|
| 1 Peak1   | 18.416 | 344    | 1969    | 0.06   |
| 2 Peak2   | 21.290 | 462214 | 3331685 | 99.94  |

Analysed by

*MO*  
10/12/18

Checked by

*dep*  
10/12/2018



## SAMPLE INFORMATION

|                   |                            |                     |              |
|-------------------|----------------------------|---------------------|--------------|
| Sample Name:      | ILS-GSR-I2-Cl2             | Acquired By:        | System       |
| A.R.Number:       | CM18K004                   | Sample Set Name:    | 14112018_003 |
| Vial:             | 28                         | Acq. Method Set:    | EST IMP_M    |
| Injection #:      | 1                          | Processing Method:  | ILS PROC     |
| Injection Volume: | 10.00 ul                   | Channel Name:       | 225.0nm      |
| Run Time:         | 35.0 Minutes               | Proc. Chnl. Descr.: | PDA 225.0 nm |
| Date Acquired:    | 11/14/2018 10:00:55 PM IST |                     |              |
| Date Processed:   | 11/15/2018 10:03:33 AM IST |                     |              |

Column: X-Bridge C18 150\*4.6mm 5µm  
 Mobile phase: A) 0.1% TFA in water B) ACN  
 T%B: 0/5,20/90,30/70,31/5,35/5  
 Flow: 1.0ml/min, Diluent: ACN :H2O (80:20)

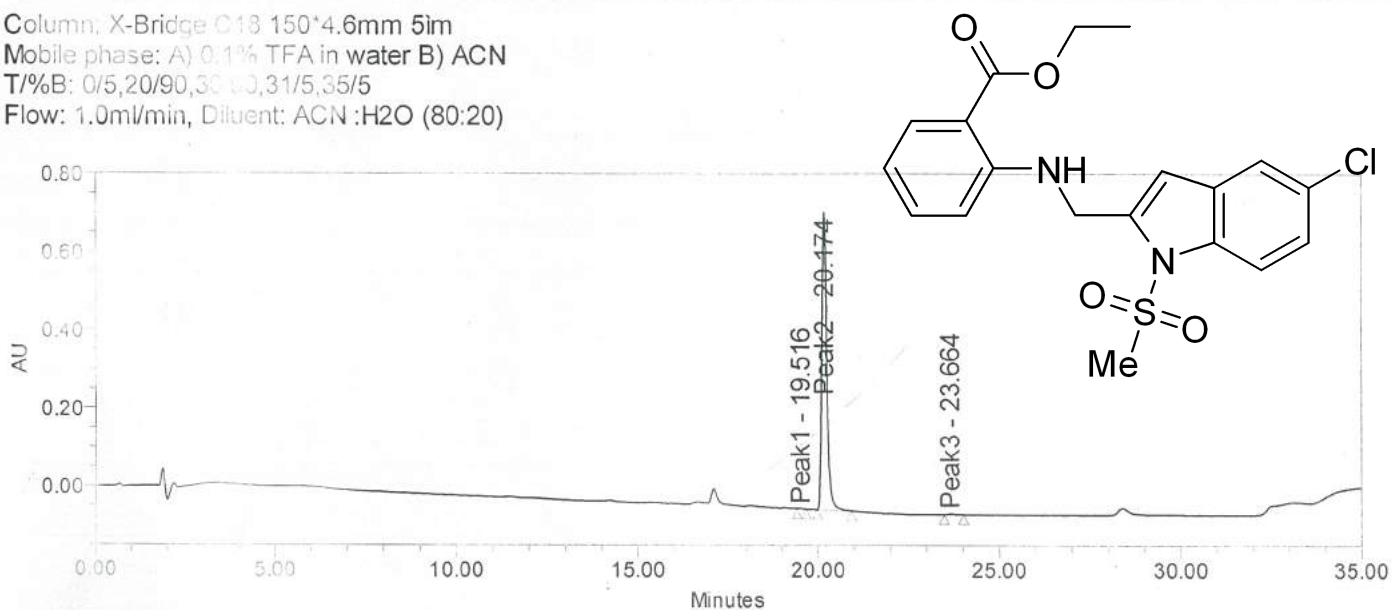

| Peak Name | RT     | Height | Area    | % Area |
|-----------|--------|--------|---------|--------|
| 1 Peak1   | 19.516 | 1336   | 9956    | 0.14   |
| 2 Peak2   | 20.174 | 765836 | 7319701 | 99.53  |
| 3 Peak3   | 23.664 | 2360   | 24250   | 0.33   |

Analysed by

*Handwritten signature*  
15/11/18

Checked by

*Handwritten signature*  
15/11/18

## SAMPLE INFORMATION

|                   |                            |                     |              |
|-------------------|----------------------------|---------------------|--------------|
| Sample Name:      | ILS-GSR-I2-BEN2            | Acquired By:        | System       |
| A.R.Number:       | CM18L003                   | Sample Set Name:    | 12122018_004 |
| Vial:             | 13                         | Acq. Method Set:    | API HMA1     |
| Injection #:      | 1                          | Processing Method:  | ILS PROC     |
| Injection Volume: | 10.00 ul                   | Channel Name:       | 218.0nm@1    |
| Run Time:         | 35.0 Minutes               | Proc. Chnl. Descr.: | PDA 218.0 nm |
| Date Acquired:    | 12/12/2018 8:44:30 PM IST  |                     |              |
| Date Processed:   | 12/13/2018 11:06:21 AM IST |                     |              |

Column: Eclipse XDB C18 150\*4.6mm 5µm  
 Mobile phase: A) 0.05% TFA in water B) 0.05% TFA in ACN  
 T/%B: 0/10,5/10,25/90,30/90,31/10,35/10  
 Flow: 1.0ml/min, Diluent: ACN :H2O (80:20)

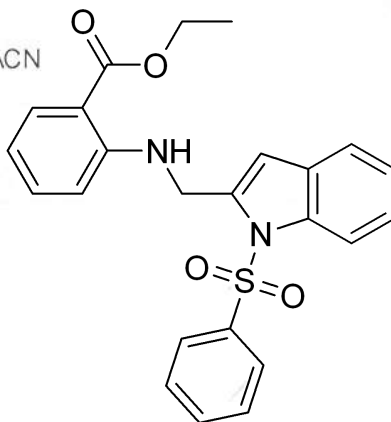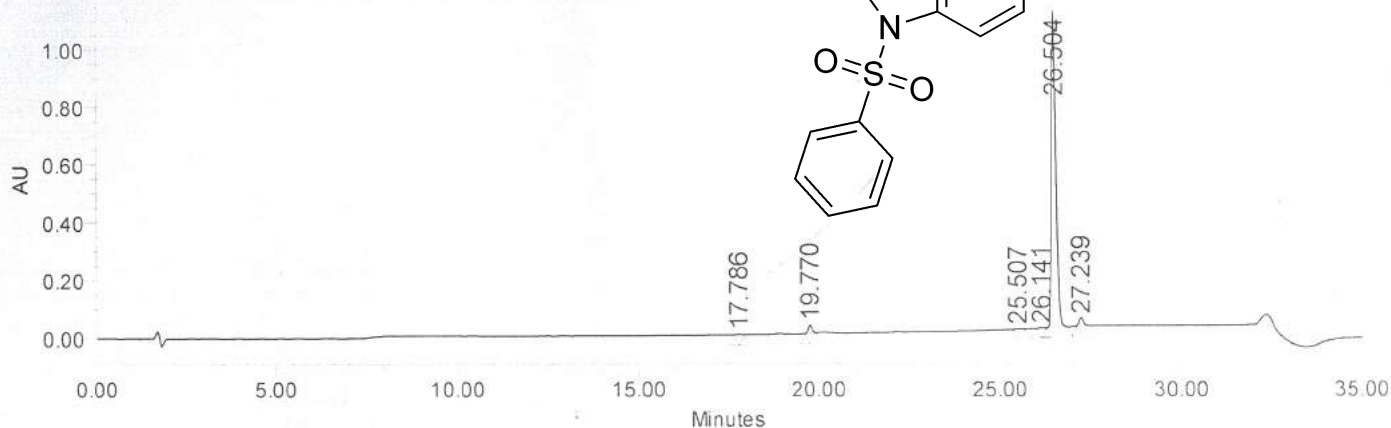

|   | RT     | Height  | Area    | % Area |
|---|--------|---------|---------|--------|
| 1 | 17.786 | 1100    | 8575    | 0.09   |
| 2 | 19.770 | 28638   | 217966  | 2.21   |
| 3 | 25.507 | 1311    | 11876   | 0.12   |
| 4 | 26.141 | 1378    | 10114   | 0.10   |
| 5 | 26.504 | 1095421 | 9384780 | 95.11  |
| 6 | 27.239 | 27376   | 234215  | 2.37   |

Analysed by

*[Signature]*  
13/12/2018

Checked by

*[Signature]*  
13/12/2018

## SAMPLE INFORMATION

|                                           |                |                     |              |
|-------------------------------------------|----------------|---------------------|--------------|
| Sample Name:                              | ILS-GSR-I2-TH2 | Acquired By:        | System       |
| A.R.Number:                               | CA19J030       | Sample Set Name:    | 18102019_02  |
| Vial:                                     | 55             | Acq. Method Set:    | ILS_RS_MET   |
| Injection #:                              | 1              | Processing Method:  | ILS PRO      |
| Injection Volume:                         | 5.00 ul        | Channel Name:       | 220.0nm      |
| Run Time:                                 | 35.0 Minutes   | Proc. Chnl. Descr.: | PDA 220.0 nm |
| Date Acquired: 10/18/2019 10:12:56 PM IST |                |                     |              |
| Date Processed: 10/21/2019 5:04:11 PM IST |                |                     |              |

Column: X-BRIDGE C-18 150\*4.6mm 5µm  
 Mobile phase: A) 5mMNH4OAC in water B) ACN  
 T/%B: 0/20, 20/90,30/90, 31/20, 35/20  
 Flow: 1.0ml/min, Diluent: ACN:THF:H<sub>2</sub>O (80:20)

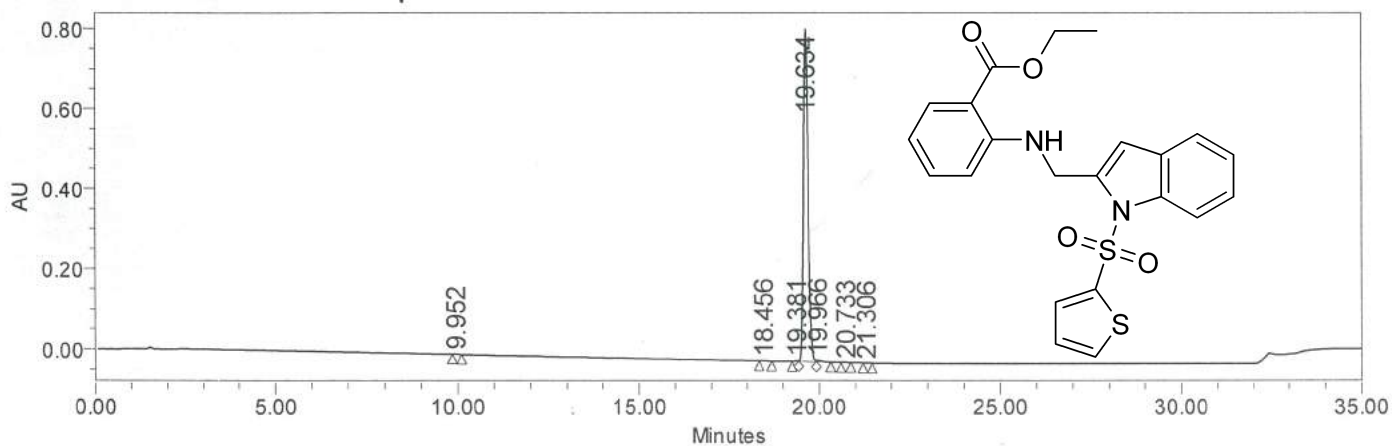

|   | RT     | Height | Area    | % Area |
|---|--------|--------|---------|--------|
| 1 | 9.952  | 689    | 5648    | 0.07   |
| 2 | 18.456 | 696    | 6437    | 0.08   |
| 3 | 19.381 | 1519   | 9517    | 0.13   |
| 4 | 19.634 | 827522 | 7547546 | 99.20  |
| 5 | 19.966 | 4102   | 37224   | 0.49   |
| 6 | 20.733 | 181    | 1401    | 0.02   |
| 7 | 21.306 | 99     | 874     | 0.01   |

Analysed by *Lomy*  
21/10/19

Checked by *del*  
21/10/19

Injection Date : Tue, 5. Nov. 2019 Seq Line : 5  
Sample Name : ILS-GSR-I2-MS2 Location : Vial 4  
CM19K002 -> CM19K002 -> Inj. No. : 1  
Inj. Vol. : 5 µl

Acq. Method : C:\Chem32\1\DATA\NOV-19\05112019-03-ABT 2019-11-05 1->  
Analysis Method : C:\CHEM32\1\METHODS\ILS NP\_M.M  
Last Changed : Wed, 6. Nov. 2019, 09:50:20 am  
(modified after loading)

Column : X-Bridge C18 150\*4.6mm 5µm  
Mobile phase: A) 5mM NH4OAC in H2O B) ACN  
T/B% : 0/30,30/90,40/90,41/5,45/5  
Flow:1.0mL/min ,Diluent: ACN :THF

## HPLC of compound 4h

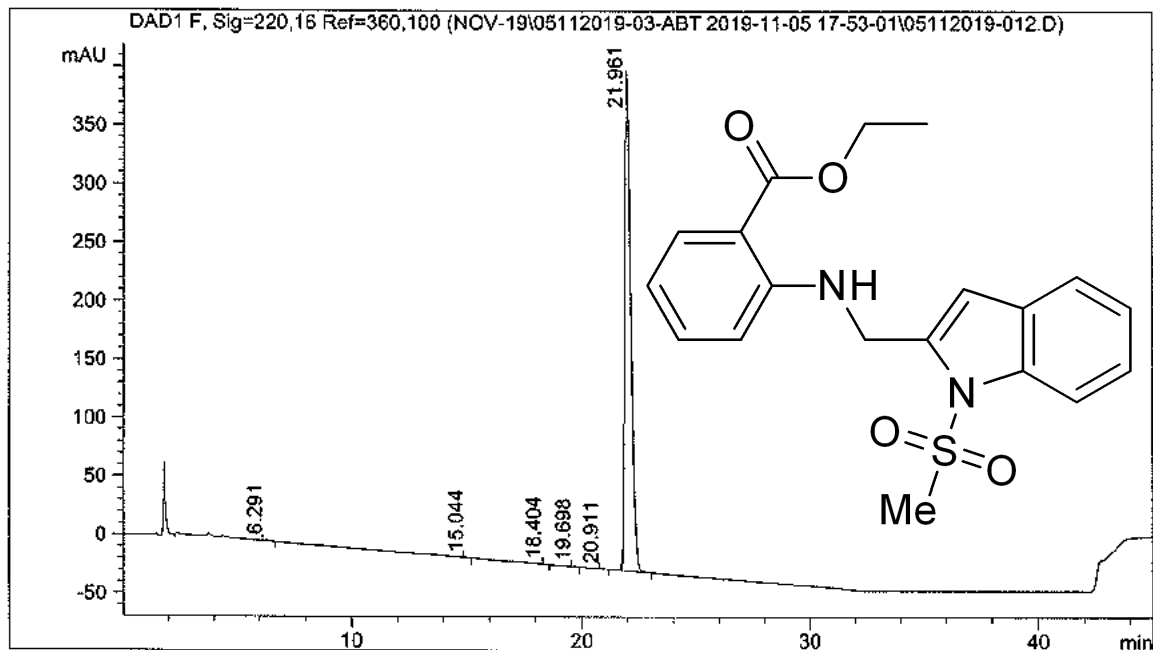

Customized Report: Short

Sorted By Signal

Calib. Data Modified : Wed, 6. Nov. 2019, 09:50:20 am  
Multiplier : 1.000000  
Dilution : 1.000000  
Uncalibrated Peaks : not reported

Signal 1: DAD1 F, Sig=220,16 Ref=360,100

| Peak # | RT [min] | Type | Width [min] | Area     | Area % | Name |
|--------|----------|------|-------------|----------|--------|------|
| 1      | 6.291    | MM   | 0.226       | 9.488    | 0.121  |      |
| 2      | 15.044   | MM   | 0.249       | 2.003    | 0.026  |      |
| 3      | 18.404   | MM   | 0.159       | 1.235    | 0.016  |      |
| 4      | 19.698   | MM   | 0.158       | 2.227    | 0.028  |      |
| 5      | 20.911   | MM   | 0.221       | 2.751    | 0.035  |      |
| 6      | 21.961   | MM   | 0.304       | 7799.881 | 99.774 |      |



## SAMPLE INFORMATION

|                                           |                  |                     |              |
|-------------------------------------------|------------------|---------------------|--------------|
| Sample Name:                              | ILS-GSR-I2-MS-Me | Acquired By:        | System       |
| A.R.Number:                               | CM19J033         | Sample Set Name:    | 30102019_03  |
| Vial:                                     | 12               | Acq. Method Set:    | ILS_RS_MET3  |
| Injection #:                              | 1                | Processing Method:  | ILS PRO      |
| Injection Volume:                         | 5.00 ul          | Channel Name:       | 215.0nm      |
| Run Time:                                 | 35.0 Minutes     | Proc. Chnl. Descr.: | PDA 215.0 nm |
| Date Acquired: 10/30/2019 11:19:44 PM IST |                  |                     |              |
| Date Processed: 10/31/2019 9:23:58 AM IST |                  |                     |              |

Column: ECLIPSE PLUS C-18 250\*4.6mm 5µm  
 Mobile phase: A) 5mMNH4OAC in water B) ACN  
 T/%B: 0/30, 20/90,30/90, 31/30, 35/30  
 Flow: 1.0ml/min, Diluent: ACN:H2O (80:20)

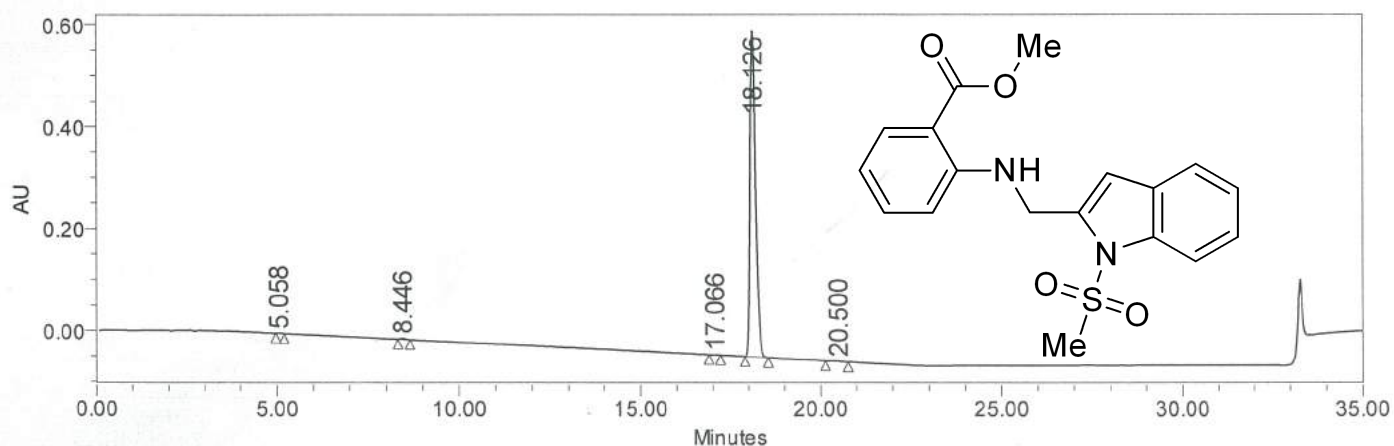

|   | RT     | Height | Area    | % Area |
|---|--------|--------|---------|--------|
| 1 | 5.058  | 285    | 2422    | 0.04   |
| 2 | 8.446  | 2199   | 20270   | 0.30   |
| 3 | 17.066 | 492    | 5327    | 0.08   |
| 4 | 18.126 | 640850 | 6677323 | 99.42  |
| 5 | 20.500 | 646    | 10690   | 0.16   |

Analysed by

*M. Renuka*  
31/10/2019

Checked by

*lep*  
31/10/19

# HPLC of compound 4j

## SAMPLE INFORMATION

|                   |                            |                     |              |
|-------------------|----------------------------|---------------------|--------------|
| Sample Name:      | ILS-GSR-l2-CI-Me           | Acquired By:        | System       |
| A.R.Number:       | CM19J053                   | Sample Set Name:    | 30102019_03  |
| Vial:             | 13                         | Acq. Method Set:    | ILS_RS_MET3  |
| Injection #:      | 1                          | Processing Method:  | ILS PRO      |
| Injection Volume: | 5.00 ul                    | Channel Name:       | 215.0nm      |
| Run Time:         | 35.0 Minutes               | Proc. Chnl. Descr.: | PDA 215.0 nm |
| Date Acquired:    | 10/30/2019 11:58:10 PM IST |                     |              |
| Date Processed:   | 10/31/2019 9:26:29 AM IST  |                     |              |

Column: ECLIPSE PLUS C-18 250\*4.6mm 5µm  
 Mobile phase: A) 5mMNH4OAC in water B) ACN  
 T/%B: 0/30, 20/90,30/90, 31/30, 35/30  
 Flow: 1.0ml/min, Diluent: ACN:H2O (80:20)

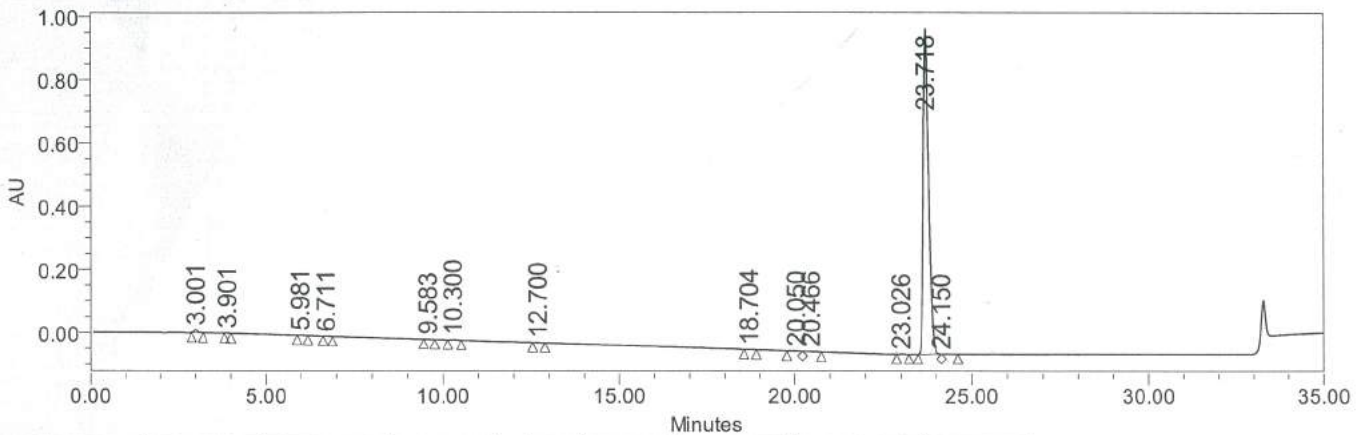

|    | RT     | Height | Area  | % Area |
|----|--------|--------|-------|--------|
| 1  | 3.001  | 8505   | 62206 | 0.57   |
| 2  | 3.901  | 1781   | 10421 | 0.10   |
| 3  | 5.981  | 850    | 7560  | 0.07   |
| 4  | 6.711  | 349    | 3319  | 0.03   |
| 5  | 9.583  | 214    | 2108  | 0.02   |
| 6  | 10.300 | 1469   | 14176 | 0.13   |
| 7  | 12.700 | 272    | 3042  | 0.03   |
| 8  | 18.704 | 673    | 8046  | 0.07   |
| 9  | 20.050 | 811    | 12156 | 0.11   |
| 10 | 20.466 | 808    | 14765 | 0.14   |
| 11 | 23.026 | 1661   | 14792 | 0.14   |

|    | RT     | Height  | Area     | % Area |
|----|--------|---------|----------|--------|
| 12 | 23.718 | 1028493 | 10659619 | 98.51  |
| 13 | 24.150 | 670     | 8390     | 0.08   |

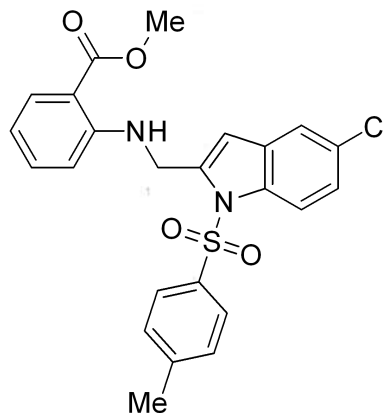

*M. Renuka*  
 31/10/2019

## SAMPLE INFORMATION

|                   |                          |                     |              |
|-------------------|--------------------------|---------------------|--------------|
| Sample Name:      | ILS-GSR-Z-TS             | Acquired By:        | System       |
| A.R.Number:       | CA19D006                 | Sample Set Name:    | 05042019_003 |
| Vial:             | 30                       | Acq. Method Set:    | ILS_MET      |
| Injection #:      | 2                        | Processing Method:  | ILS_PRO      |
| Injection Volume: | 5.00 ul                  | Channel Name:       | 250.0nm      |
| Run Time:         | 35.0 Minutes             | Proc. Chnl. Descr.: | PDA 250.0 nm |
| Date Acquired:    | 4/6/2019 12:13:09 AM IST |                     |              |
| Date Processed:   | 4/9/2019 10:43:39 AM IST |                     |              |

Column: Eclips XDB C18 150\*4.6mm 5µm  
 Mobile phase: A) 0.05% TFA in water B) 0.05% TFA in ACN  
 T/%B: 0/30,20/90,30/90,31/30,35/30  
 Flow: 1.0ml/min, Diluent: ACN:WATER (80:20)

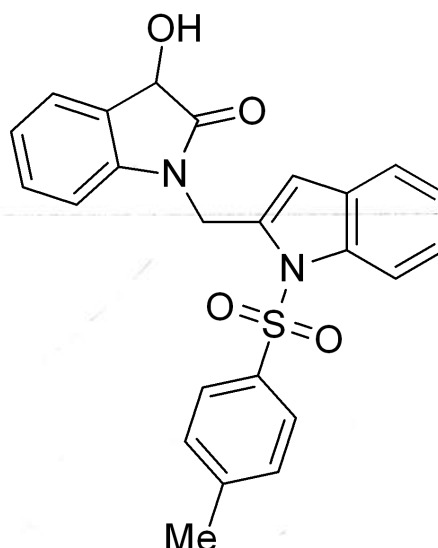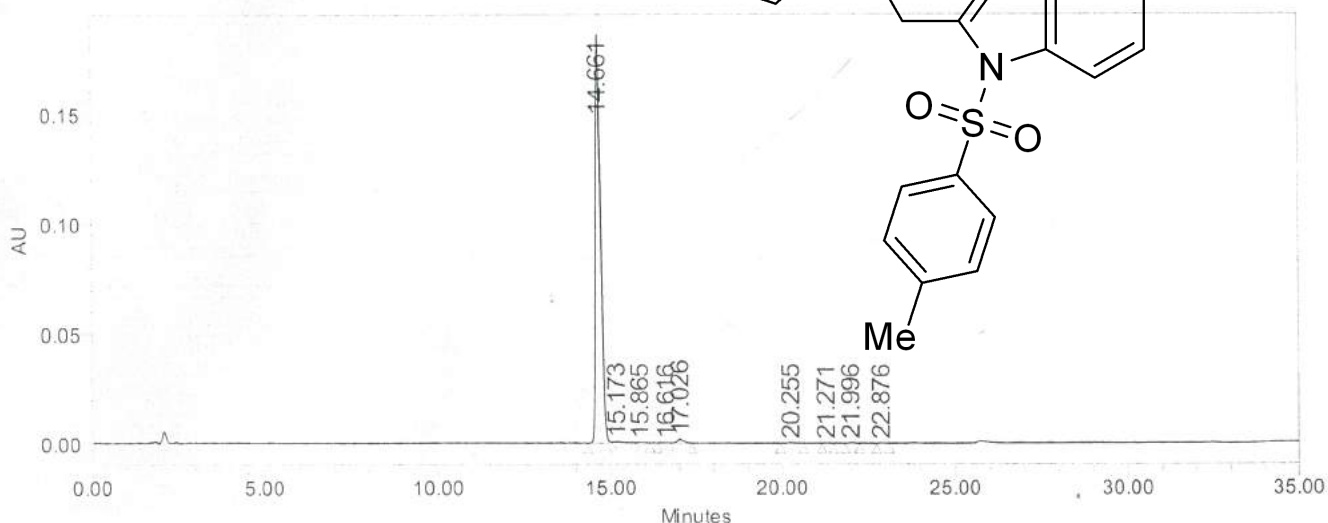

|   | RT     | Height | Area    | % Area |
|---|--------|--------|---------|--------|
| 1 | 14.661 | 186475 | 2026338 | 97.90  |
| 2 | 15.173 | 560    | 10821   | 0.52   |
| 3 | 15.865 | 179    | 2426    | 0.12   |
| 4 | 16.616 | 60     | 873     | 0.04   |
| 5 | 17.026 | 1833   | 22617   | 1.09   |
| 6 | 20.255 | 123    | 2077    | 0.10   |

|   | RT     | Height | Area | % Area |
|---|--------|--------|------|--------|
| 7 | 21.271 | 62     | 686  | 0.03   |
| 8 | 21.996 | 284    | 3288 | 0.16   |
| 9 | 22.876 | 63     | 741  | 0.04   |

*M. Benyka*  
*09/04/2019*

*dep*  
*09/04/19*

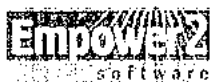

# HPLC of compound 5b

CPRI@DRILS

## SAMPLE INFORMATION

|                   |                           |                     |                    |
|-------------------|---------------------------|---------------------|--------------------|
| Sample Name:      | ILS-GSR-Z-BEN             | Acquired By:        | System             |
| A.R.Number:       | CA19D014                  | Sample Set Name:    | 22042019_002       |
| Vial:             | 104                       | Acq. Method Set:    | API BDM IMP01 B4_M |
| Injection #:      | 1                         | Processing Method:  | BDM PRO            |
| Injection Volume: | 5.00 ul                   | Channel Name:       | 210.0nm            |
| Run Time:         | 30.0 Minutes              | Proc. Chnl. Descr.: | PDA 210.0 nm       |
| Date Acquired:    | 4/22/2019 7:41:42 PM IST  |                     |                    |
| Date Processed:   | 4/23/2019 11:33:57 AM IST |                     |                    |

Column: COSMICSIL C-18 150\*4.6mm 5um  
Mobile phase: A) 5MM AMMONIUM ACETATE in water B) ACN  
T/%B: 0/5,20/90,25/90,26/5,30/5  
Flow: 1.0ml/min, Diluent: ACN:H2O (80:20)

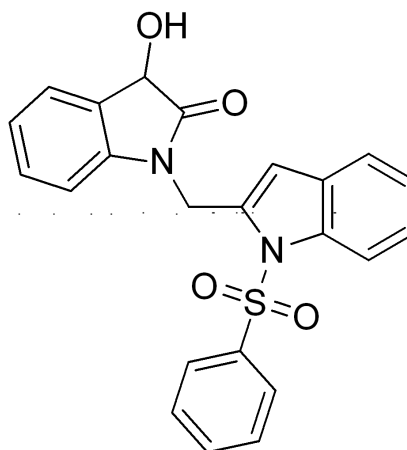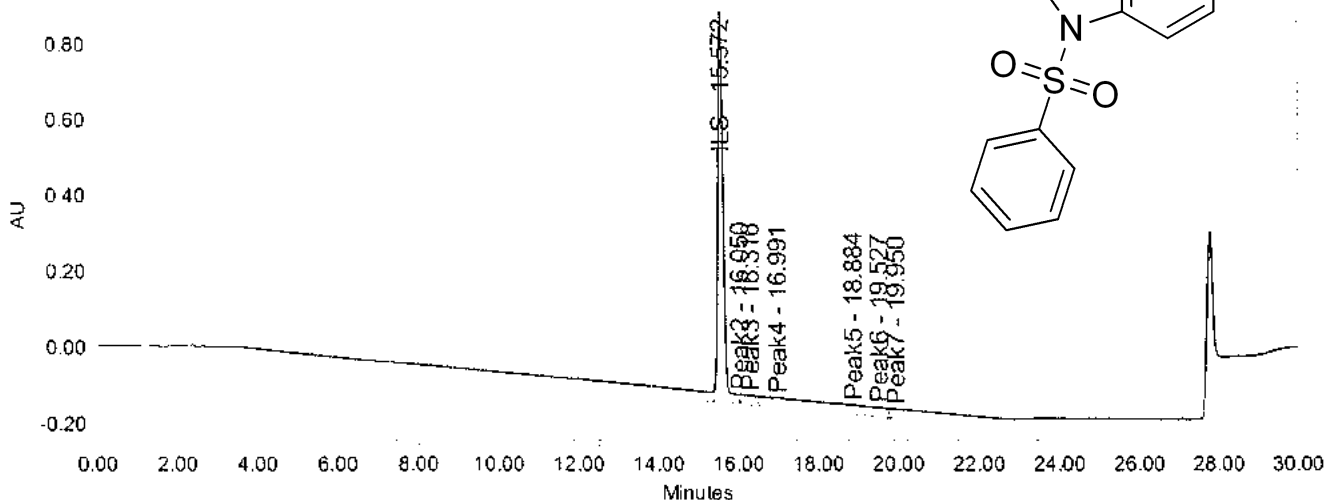

| Peak Name | RT     | Height  | Area    | % Area |
|-----------|--------|---------|---------|--------|
| 1 ILS     | 15.572 | 1005543 | 8302178 | 99.26  |
| 2 Peak2   | 16.050 | 491     | 3855    | 0.05   |
| 3 Peak3   | 16.316 | 328     | 3500    | 0.04   |
| 4 Peak4   | 16.991 | 2285    | 22383   | 0.27   |
| 5 Peak5   | 18.884 | 1499    | 12097   | 0.14   |
| 6 Peak6   | 19.527 | 1898    | 15178   | 0.18   |

| Peak Name | RT     | Height | Area | % Area |
|-----------|--------|--------|------|--------|
| 7 Peak7   | 19.950 | 528    | 4608 | 0.06   |

Reported by User: System  
Report Method: CPRI@DRILS\_RRT  
Report Method ID: 4191  
Page: 1 of 2

Project Name: 2019\APR-2019  
Date Printed:  
4/23/2019  
11:34:17 AM Asia/Calcutta



## SAMPLE INFORMATION

|                                          |              |                     |              |
|------------------------------------------|--------------|---------------------|--------------|
| Sample Name:                             | ILS/GSR/Z/MS | Acquired By:        | System       |
| AR Number :                              | CM19D012     | Sample Set Name:    | 12042019_004 |
| Vial:                                    | 105          | Acq. Method Set:    | API LEC      |
| Injection #:                             | 1            | Processing Method:  | ILS PRO      |
| Injection Volume:                        | 5.00 ul      | Channel Name:       | 210.0nm@1    |
| Run Time:                                | 30.0 Minutes | Proc. Chnl. Descr.: | PDA 210.0 nm |
| Date Acquired: 4/12/2019 9:05:00 PM IST  |              |                     |              |
| Date Processed: 4/13/2019 3:46:49 PM IST |              |                     |              |

Column : COSMICSIL C18 150\*4.6mm 5µm  
 Mobile phase : A) 0.05%TFA in water B) 0.05%TFA in ACN  
 T/%B: 0/5,20/90,25/90,26/5,30/5  
 Flow:1.0ml/min,Diluent: ACN:H2O(80:20)

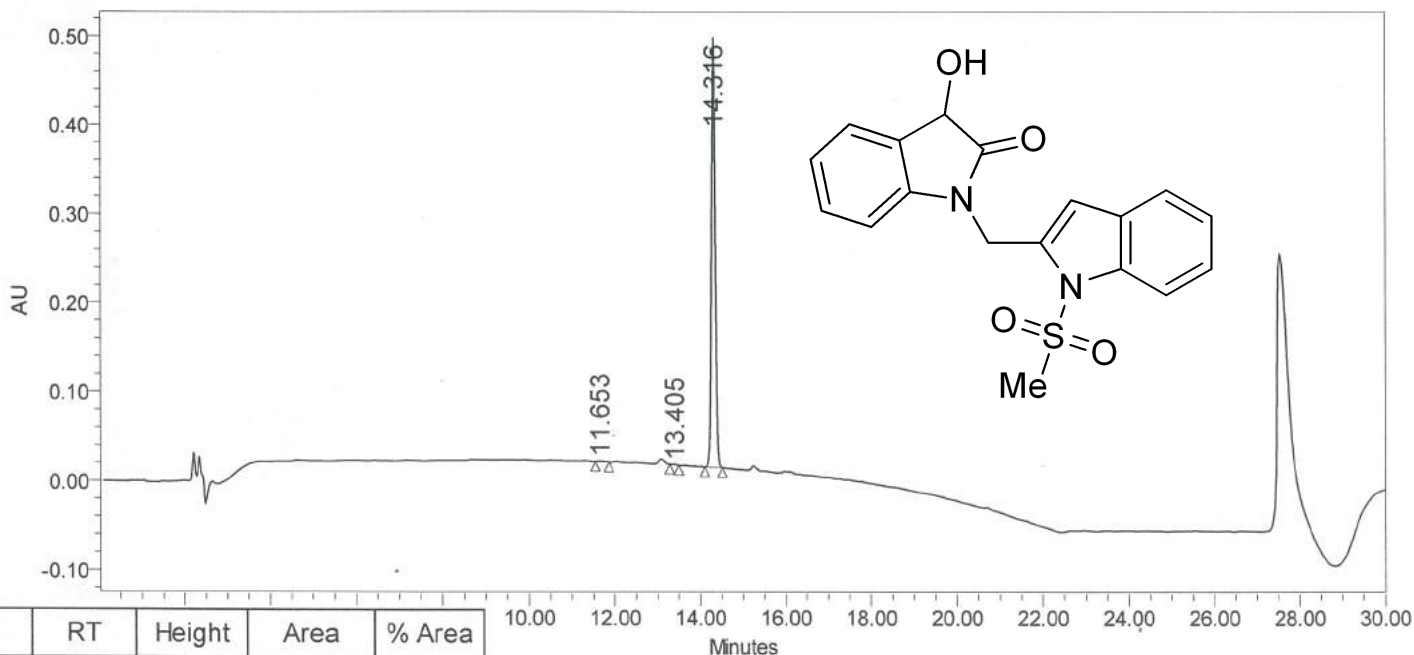

|   | RT     | Height | Area    | % Area |
|---|--------|--------|---------|--------|
| 1 | 11.653 | 957    | 10455   | 0.38   |
| 2 | 13.405 | 829    | 4947    | 0.18   |
| 3 | 14.316 | 477224 | 2750816 | 99.44  |

Analysed By:

*[Signature]*  
13/04/2019

Checked By:

*[Signature]*  
15/04/2019

## SAMPLE INFORMATION

|                   |                          |                     |              |
|-------------------|--------------------------|---------------------|--------------|
| Sample Name:      | ILS-GSR-Z-DTS            | Acquired By:        | System       |
| A.R.Number:       | CA19D005                 | Sample Set Name:    | 05042019_003 |
| Vial:             | 29                       | Acq. Method Set:    | ILS_MET      |
| Injection #:      | 1                        | Processing Method:  | ILS_PRO      |
| Injection Volume: | 5.00 ul                  | Channel Name:       | 215.0nm      |
| Run Time:         | 35.0 Minutes             | Proc. Chnl. Descr.: | PDA 215.0 nm |
| Date Acquired:    | 4/5/2019 10:23:35 PM IST |                     |              |
| Date Processed:   | 4/8/2019 11:36:06 AM IST |                     |              |

Column: X BRIDGE PHENYL C18 150\*4.6mm 5µm  
 Mobile phase: A) 0.05%TFA IN WATER B) ACN:WATER(90:10)  
 T/%B: 0/2,5/2,20/90,25/90,26/2,30/2  
 Flow: 1.0ml/min, Diluent: THF:ACN:WATER (80:20)

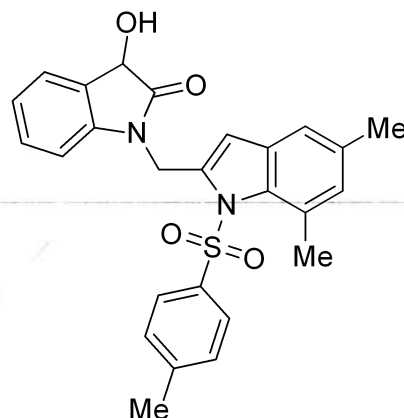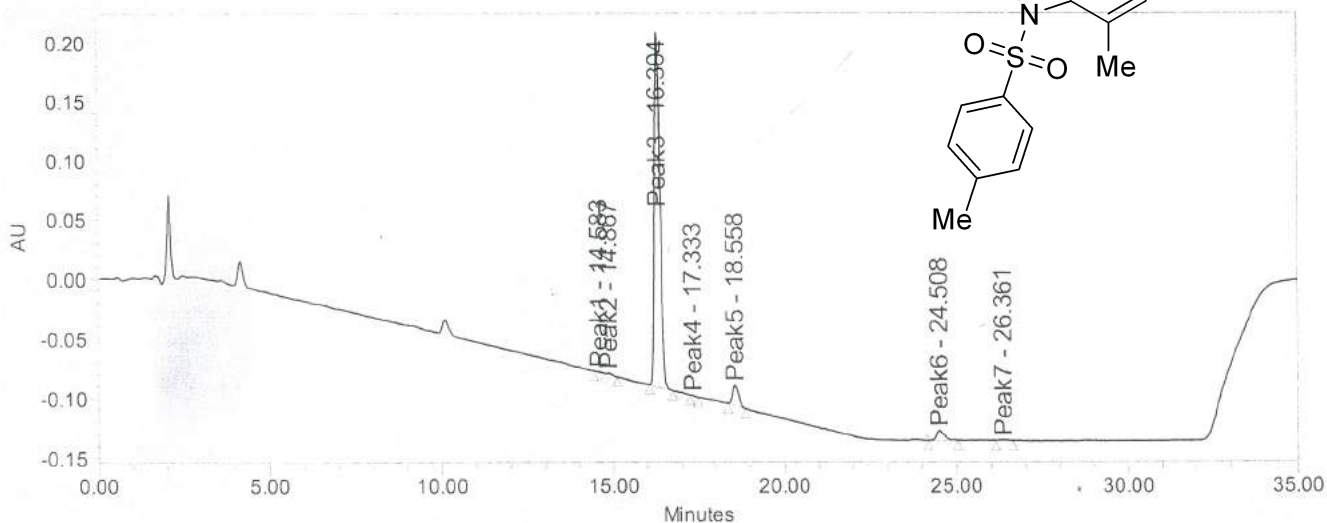

|   | Peak Name | RT     | Height | Area    | % Area |
|---|-----------|--------|--------|---------|--------|
| 1 | Peak1     | 14.583 | 453    | 6116    | 0.16   |
| 2 | Peak2     | 14.867 | 1146   | 15057   | 0.40   |
| 3 | Peak3     | 16.304 | 298825 | 3407381 | 90.54  |
| 4 | Peak4     | 17.333 | 292    | 2318    | 0.06   |
| 5 | Peak5     | 18.558 | 16753  | 203625  | 5.41   |
| 6 | Peak6     | 24.508 | 8123   | 123701  | 3.29   |

|   | Peak Name | RT     | Height | Area | % Area |
|---|-----------|--------|--------|------|--------|
| 7 | Peak7     | 26.361 | 311    | 5044 | 0.13   |

*M. Lenika.*  
08/04/2019

*lp*  
08/04/2019
